# Supplementary material for: Cytochalasans from the Endophytic Fungus Aspergillus sp. LE2: Their Structures, Antibacterial and NO Production Inhibitory Activities
Source: J Fungi (Basel). 2023 Mar 19;9(3):374. doi: 10.3390/jof9030374 (PMC10051723; doi:10.3390/jof9030374)

## **Cytochalasans from the Endophytic Fungus *Aspergillus* sp. LE2: Their Structures, Antibacterial and NO Production Inhibitory Activities**

**Yong-Chao Li <sup>1,3,\*</sup>, Jing Yang <sup>1,3</sup>, Yuan-Zeng Zhao <sup>1,3</sup>, Qin-Di Ma <sup>1,3</sup>, Ben-Guo Liu <sup>2,3</sup>, and Jun-Liang Sun <sup>2,3</sup>**

<sup>1</sup> School of Life Science and Technology, Henan Institute of Science and Technology, Xinxiang 453003, People's Republic of China

<sup>2</sup> School of Food Science, Henan Institute of Science and Technology, Xinxiang 453003, People's Republic of China

<sup>3</sup> Henan International Joint Laboratory of Plant Genetic Improvement and Soil Remediation, Xinxiang 453003, People's Republic of China

\*Correspondence: histlyc@163.com (Y. C. L.)

### **Contents**

#### **Section S1. NMR and MS spectra for Compounds 1–6.**

Figure S1-S7. NMR and mass spectra of aspergicytochalasin A (1).

Figure S8-S14. NMR and mass spectra of aspergicytochalasin B (2).

Figure S15-S21. NMR and mass spectra of aspergicytochalasin C (3).

Figure S22-S28. NMR and mass spectra of aspergicytochalasin D (4).

Figure S29-S35. NMR and mass spectra of aspergicytochalasin E (5).

Figure S36-S42. NMR and mass spectra of aspergicytochalasin F (6).

#### **Section S2. X-Ray Crystallographic Data for aspergicytochalasin A (1).**

## Section S1. NMR and MS spectra for Compounds 1–6.

**Figure S1.**  $^1\text{H}$  NMR (600 MHz, methanol- $d_4$ ) spectrum of aspergicytochalasin A (**1**)

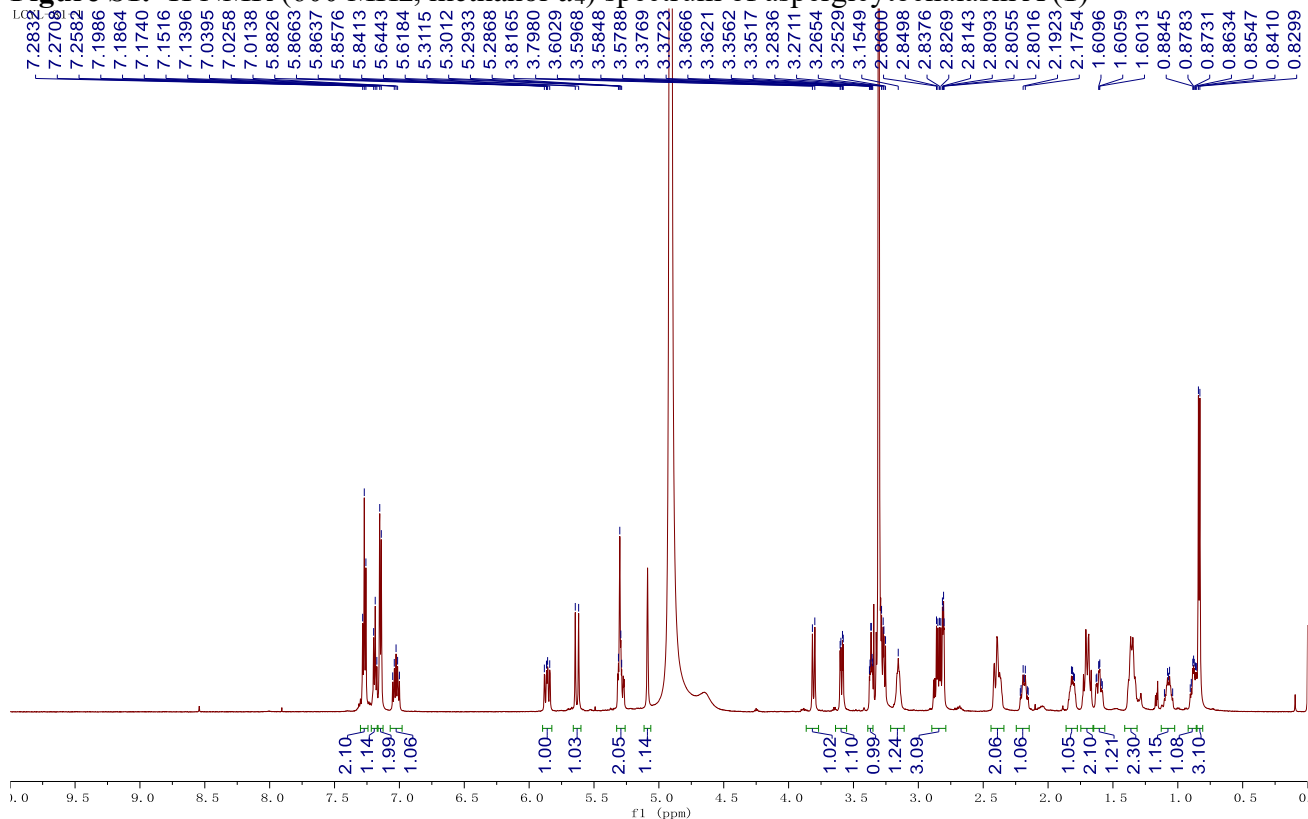

**Figure S2.**  $^{13}\text{C}$  NMR (150 MHz, methanol- $d_4$ ) spectrum of aspergicytochalasin A (**1**)

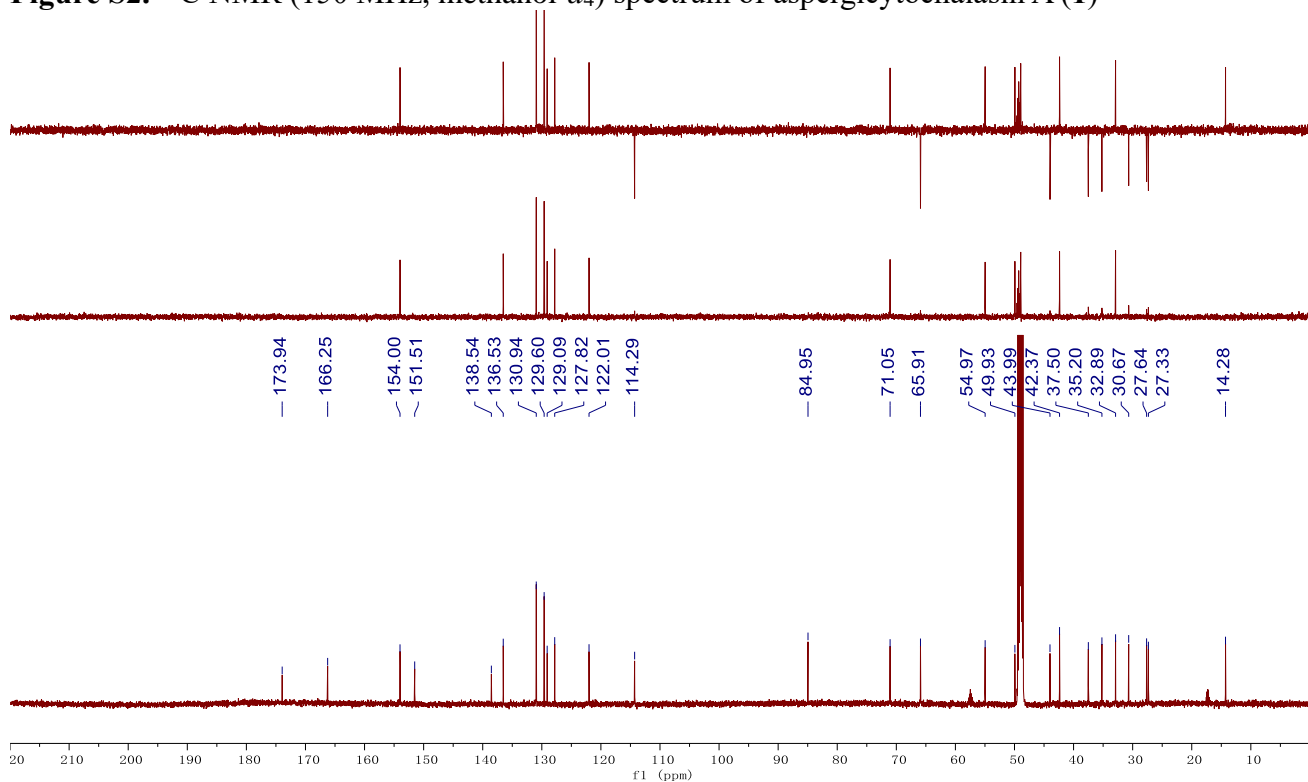

**Figure S3.** HSQC spectrum of aspergicytochalasin A (**1**)

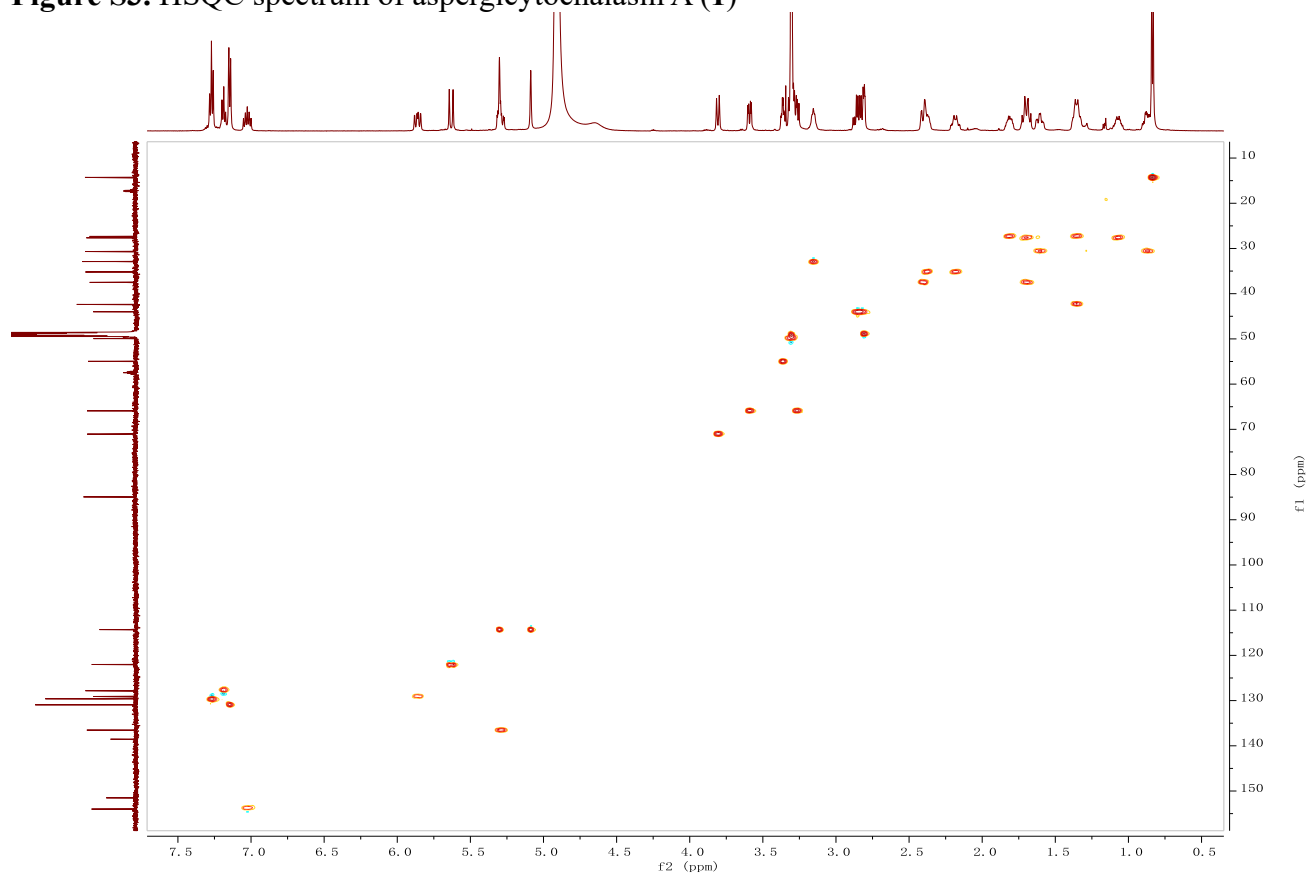

**Figure S4.** HMBC spectrum of aspergicytochalasin A (**1**)

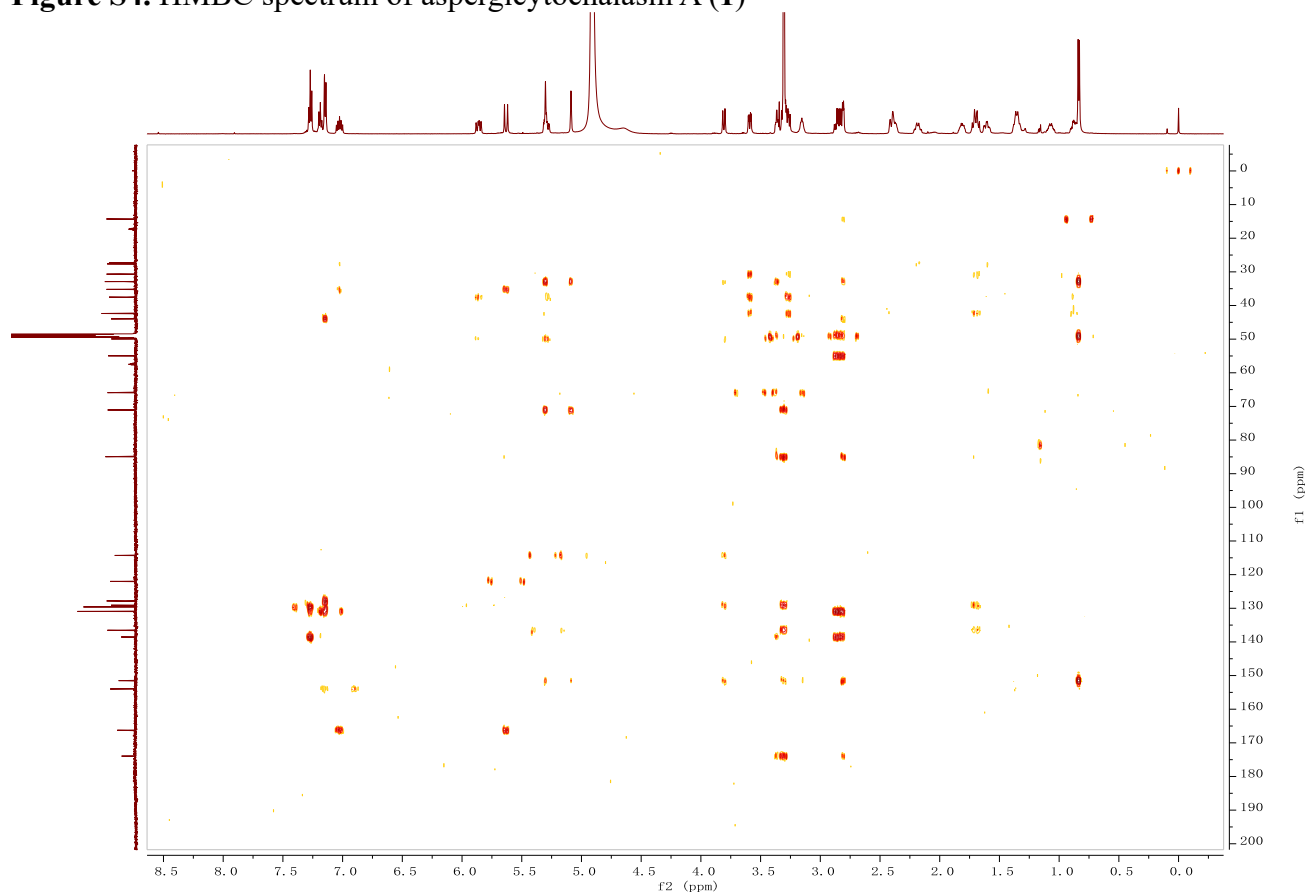

**Figure S5.**  $^1\text{H}$ - $^1\text{H}$  COSY spectrum of aspergicytochalasin A (**1**)

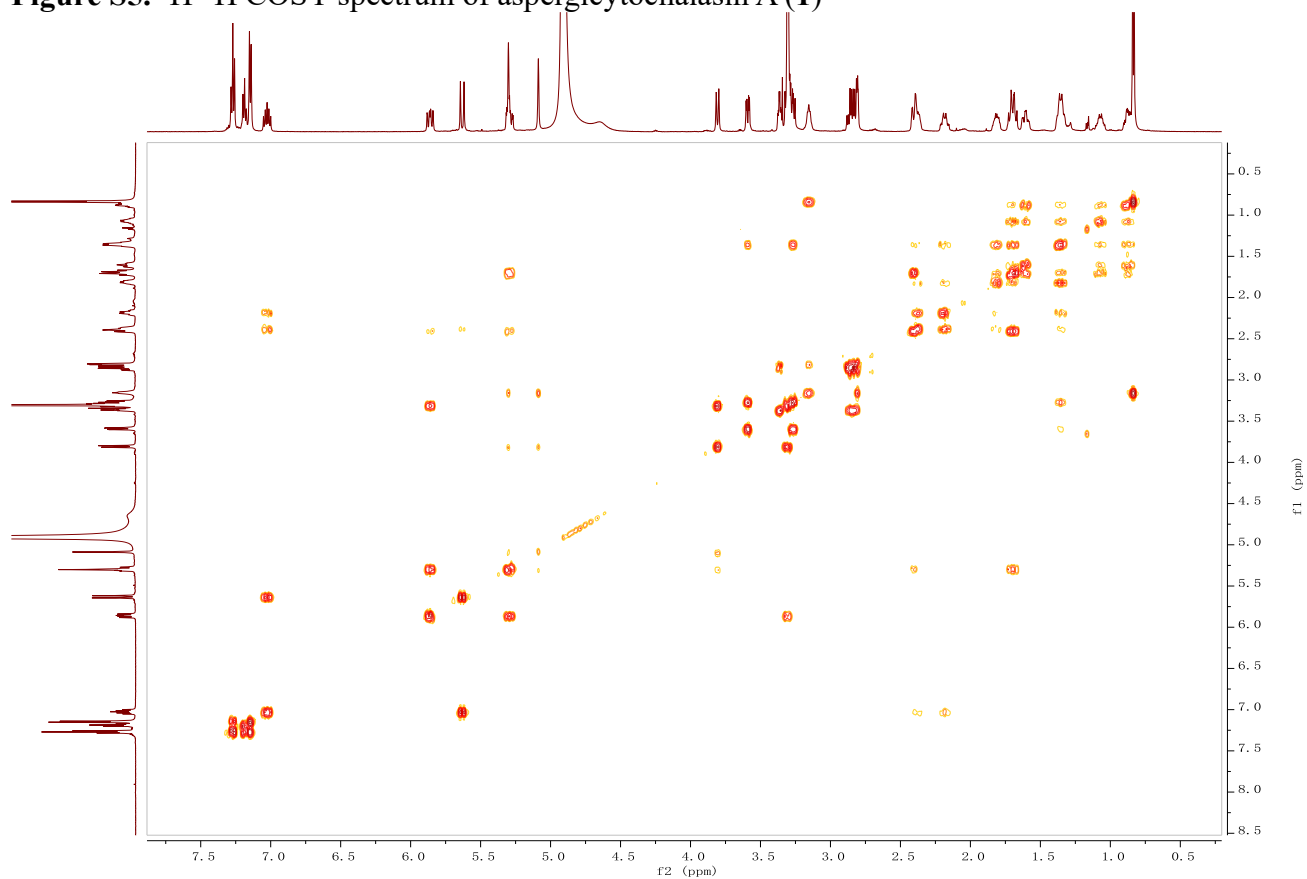

**Figure S6.** ROESY spectrum of aspergicytochalasin A (**1**)

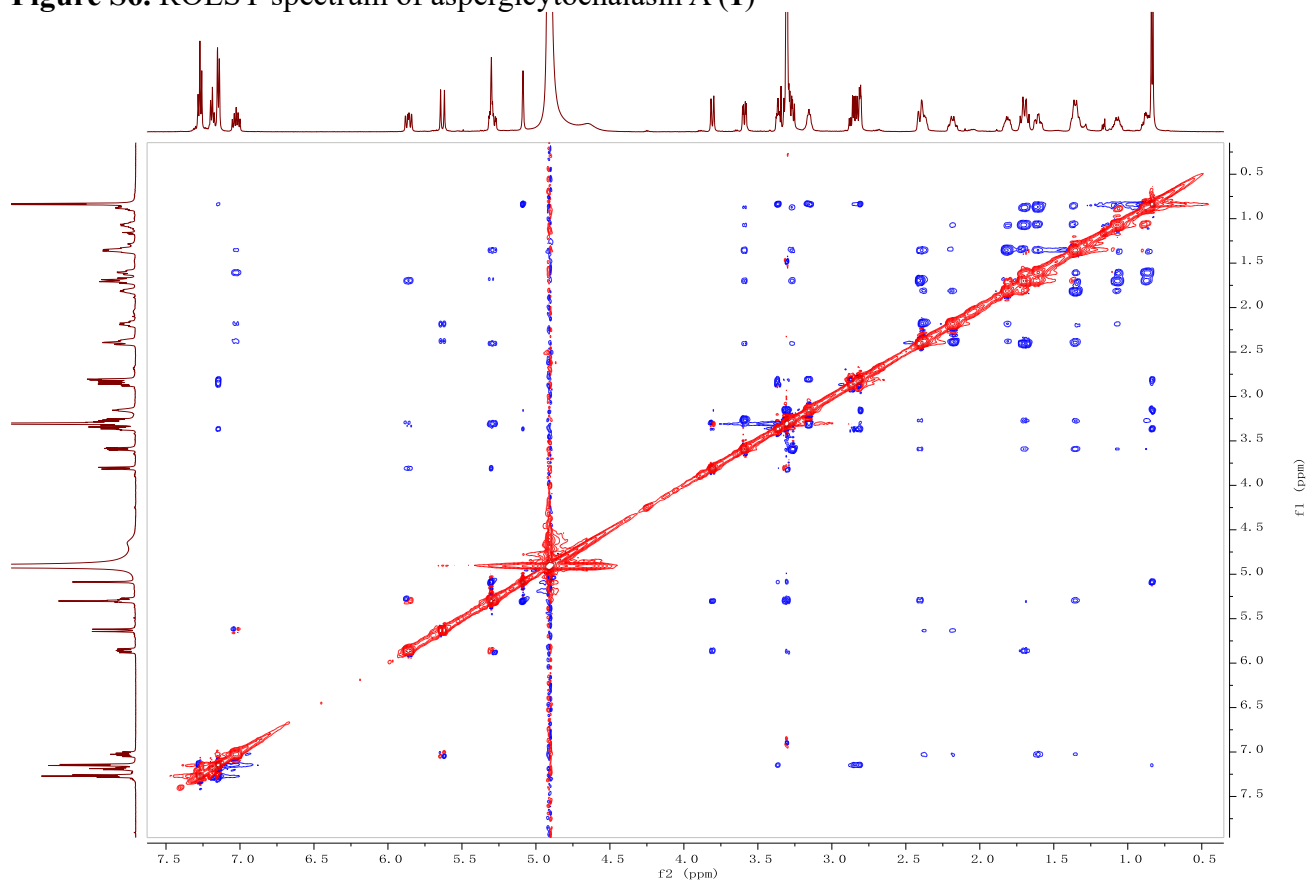

**Figure S7.** HRESIMS of aspergicytochalasin A (**1**)

T: FTMS + p ESI Full lock ms [150.0000-1100.0000]

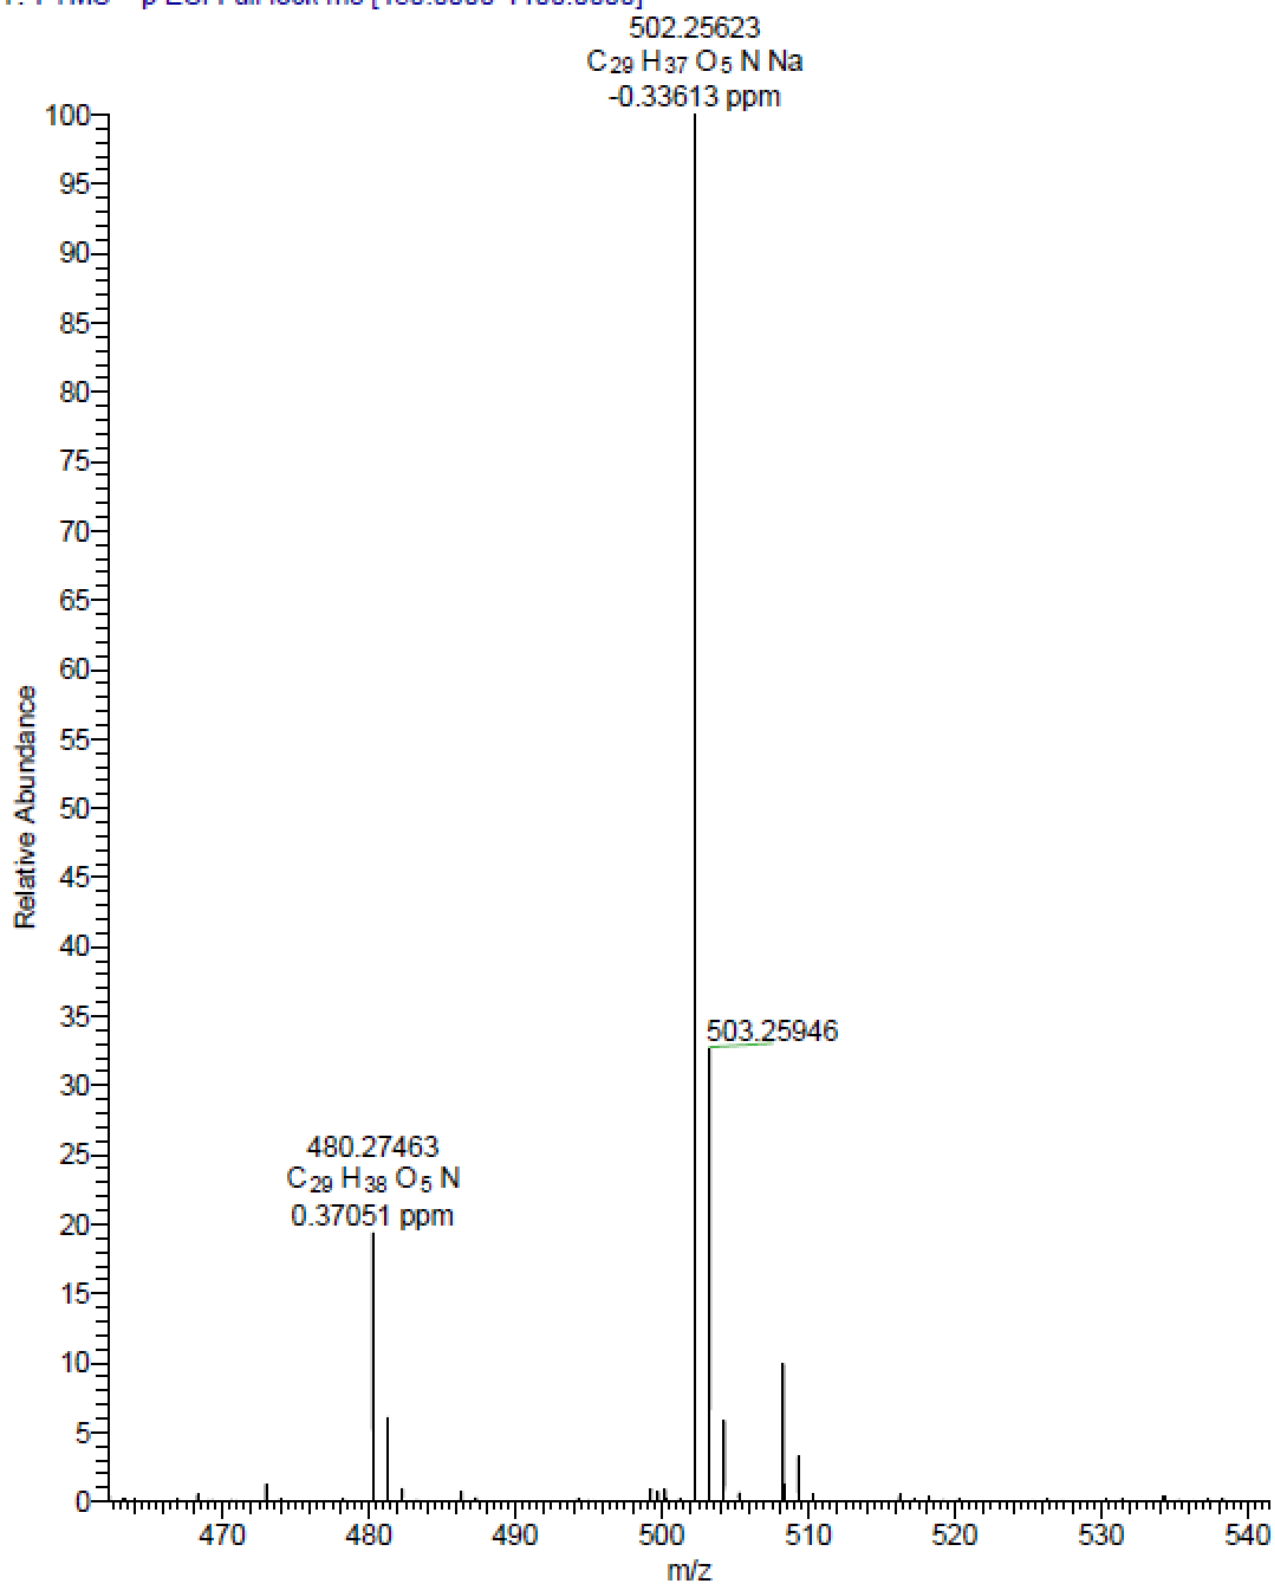

**Figure S8.**  $^1\text{H}$  NMR (600 MHz, methanol- $d_4$ ) spectrum of aspergicytochalasin B (**2**)

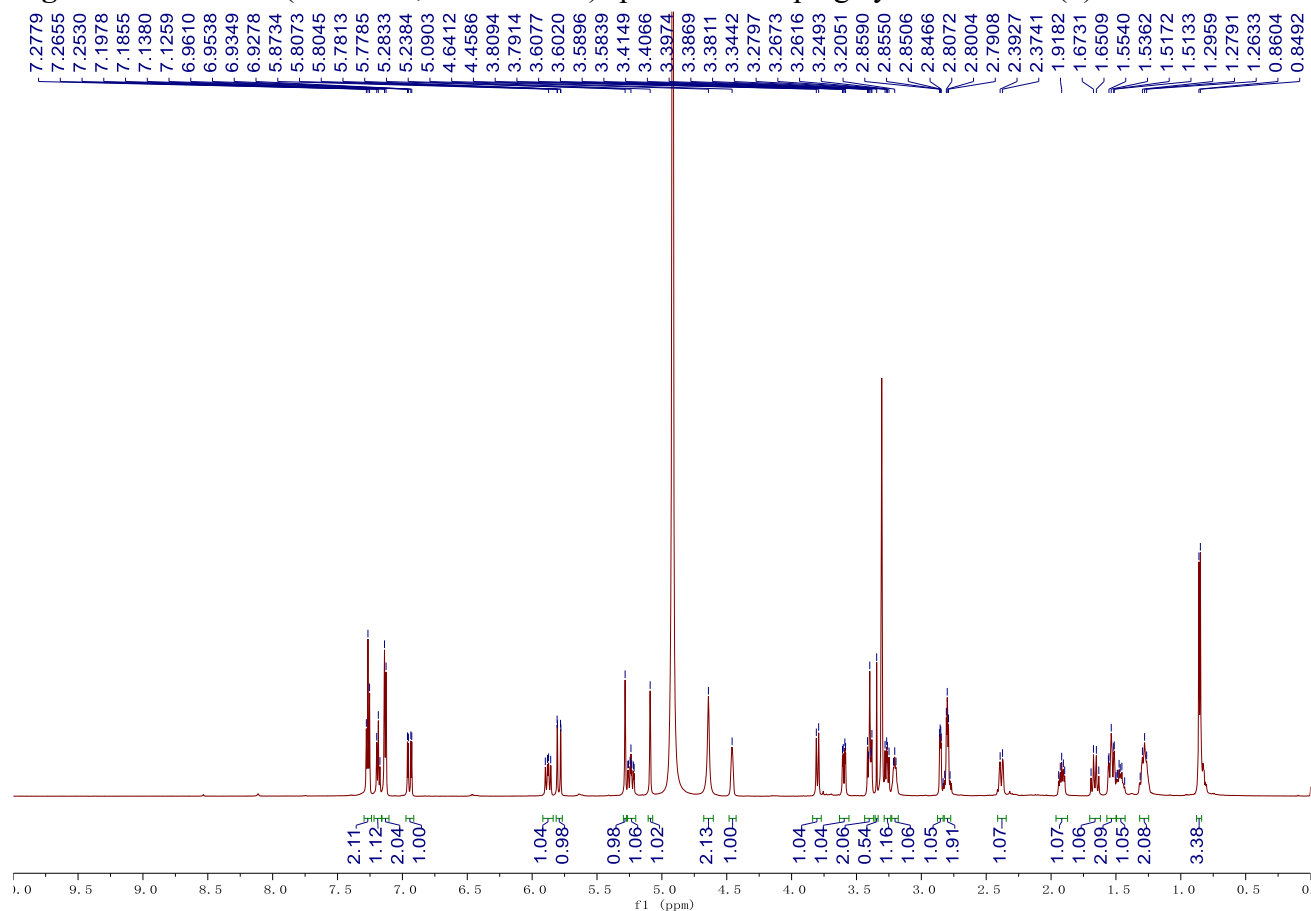

**Figure S9.**  $^{13}\text{C}$  NMR (150 MHz, methanol- $d_4$ ) spectrum of aspergicytochalasin B (**2**)

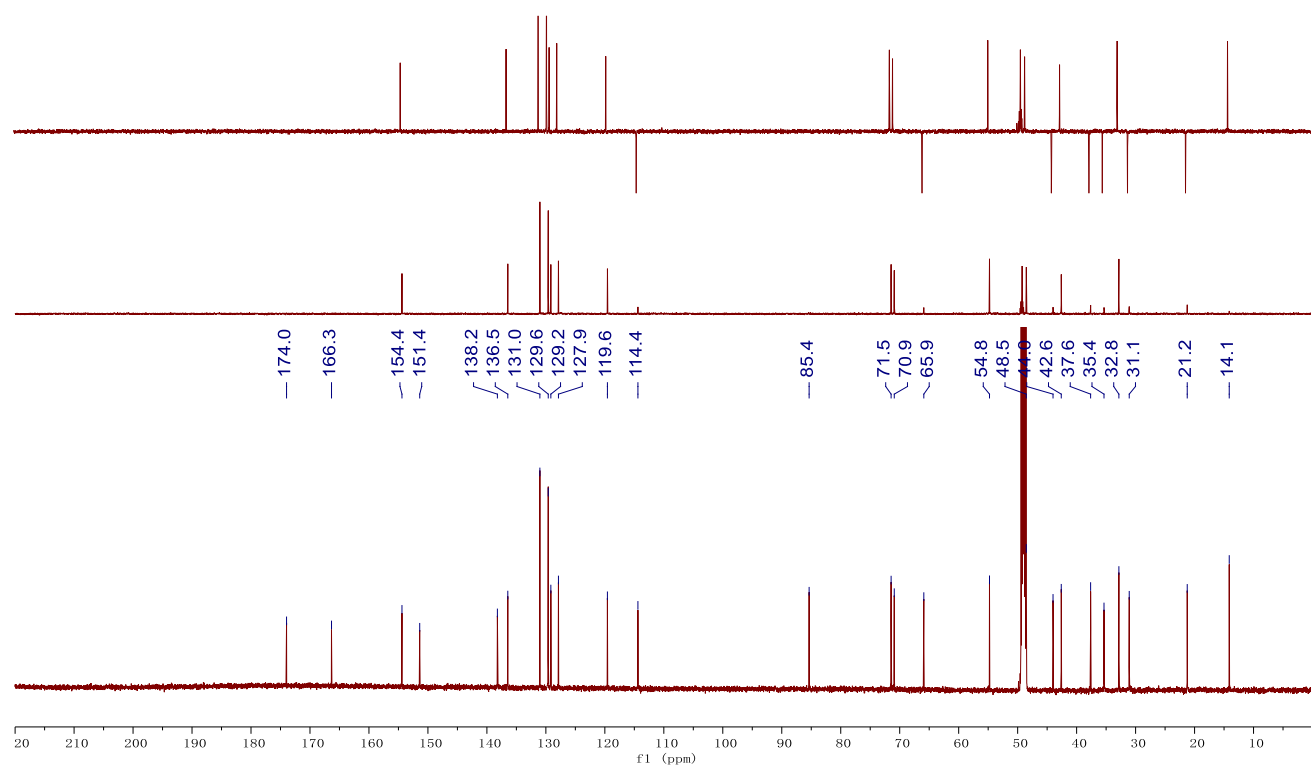

**Figure S10.** HSQC spectrum of aspergicytochalasin B (2)

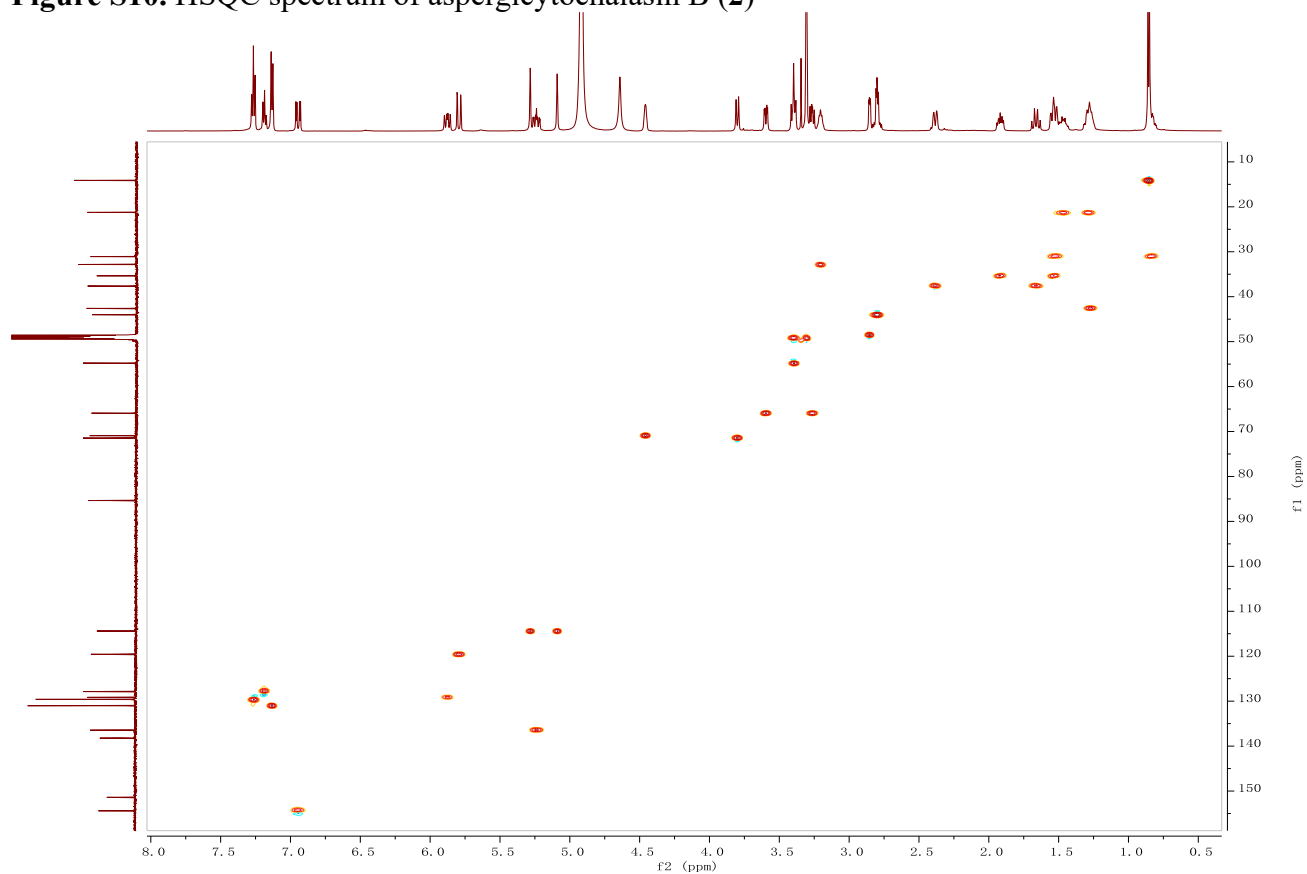

**Figure S11.** HMBC spectrum of aspergicytochalasin B (2)

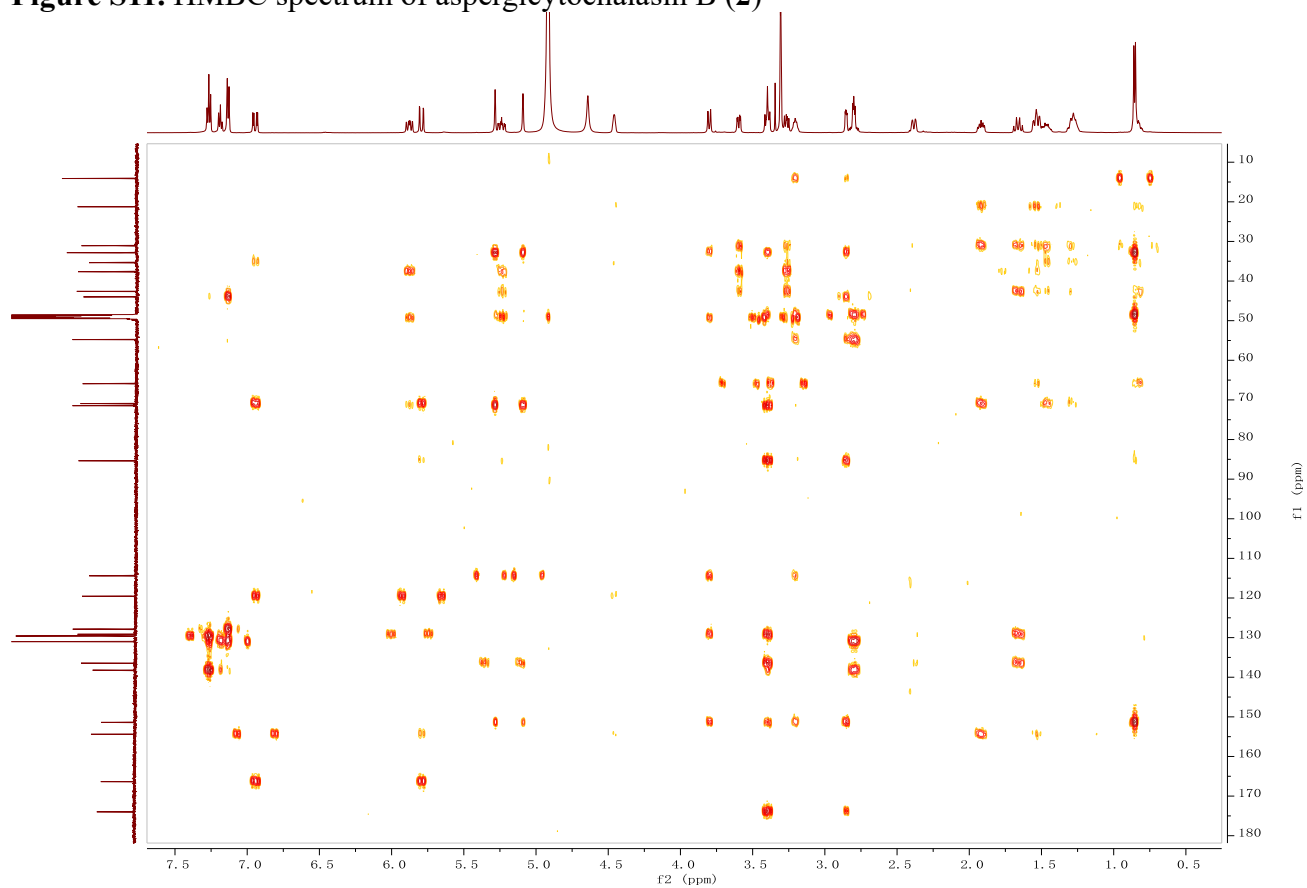

**Figure S12.**  $^1\text{H}$ - $^1\text{H}$  COSY spectrum of aspergicytochalasin B (**2**)

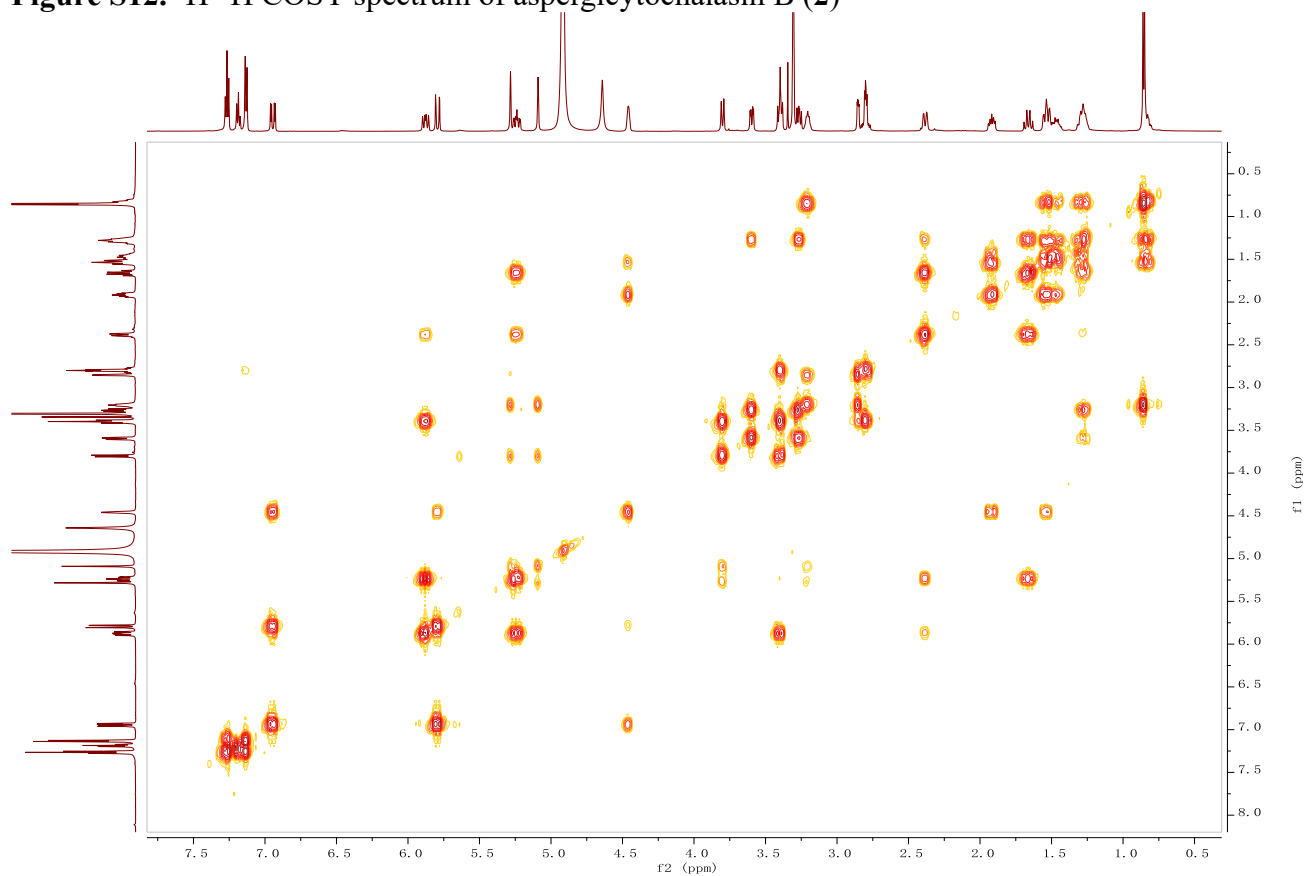

**Figure S13.** ROESY spectrum of aspergicytochalasin B (**2**)

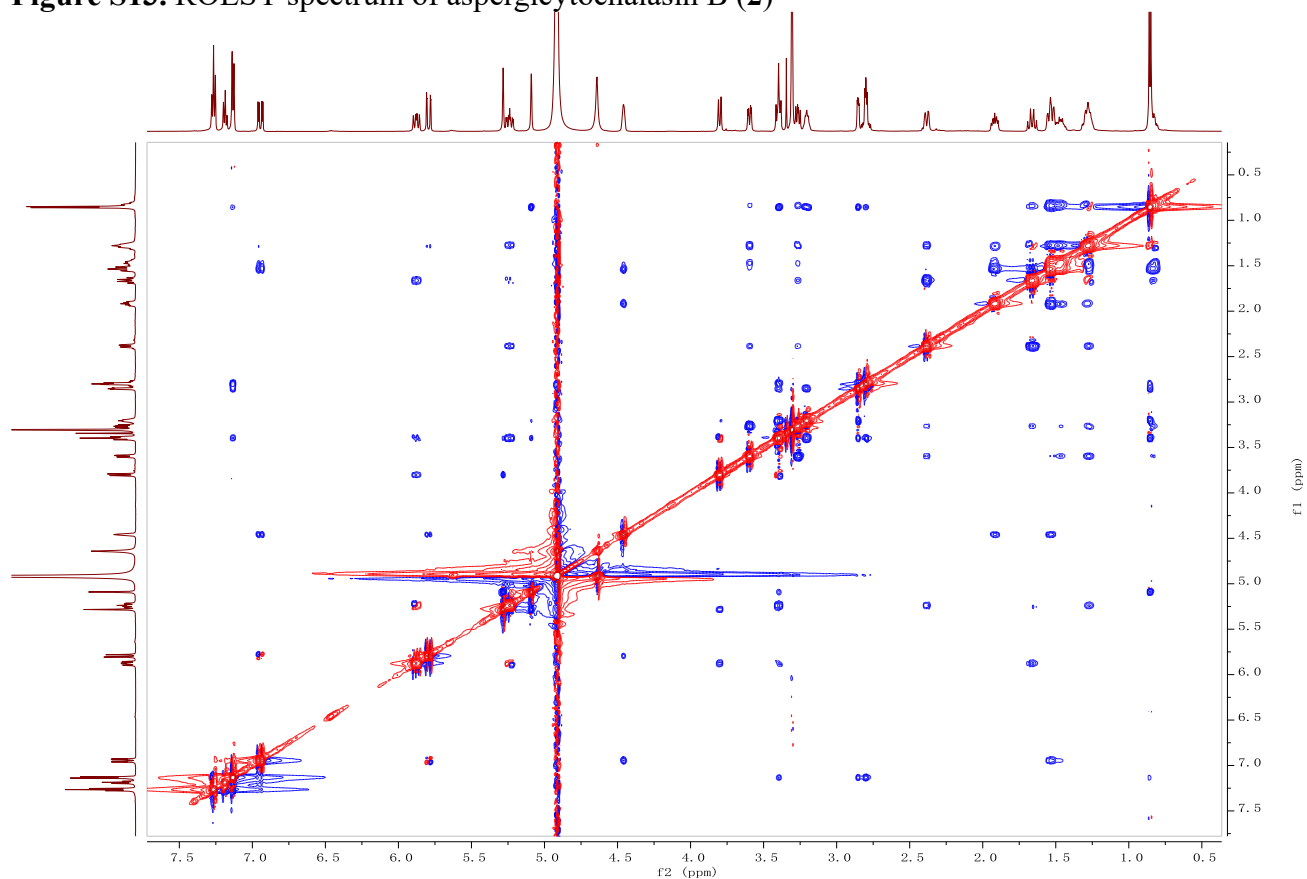

**Figure S14.** HRESIMS of aspergicytochalasin B (2)

T: FTMS + p ESI Full lock ms [150.0000-1100.0000]

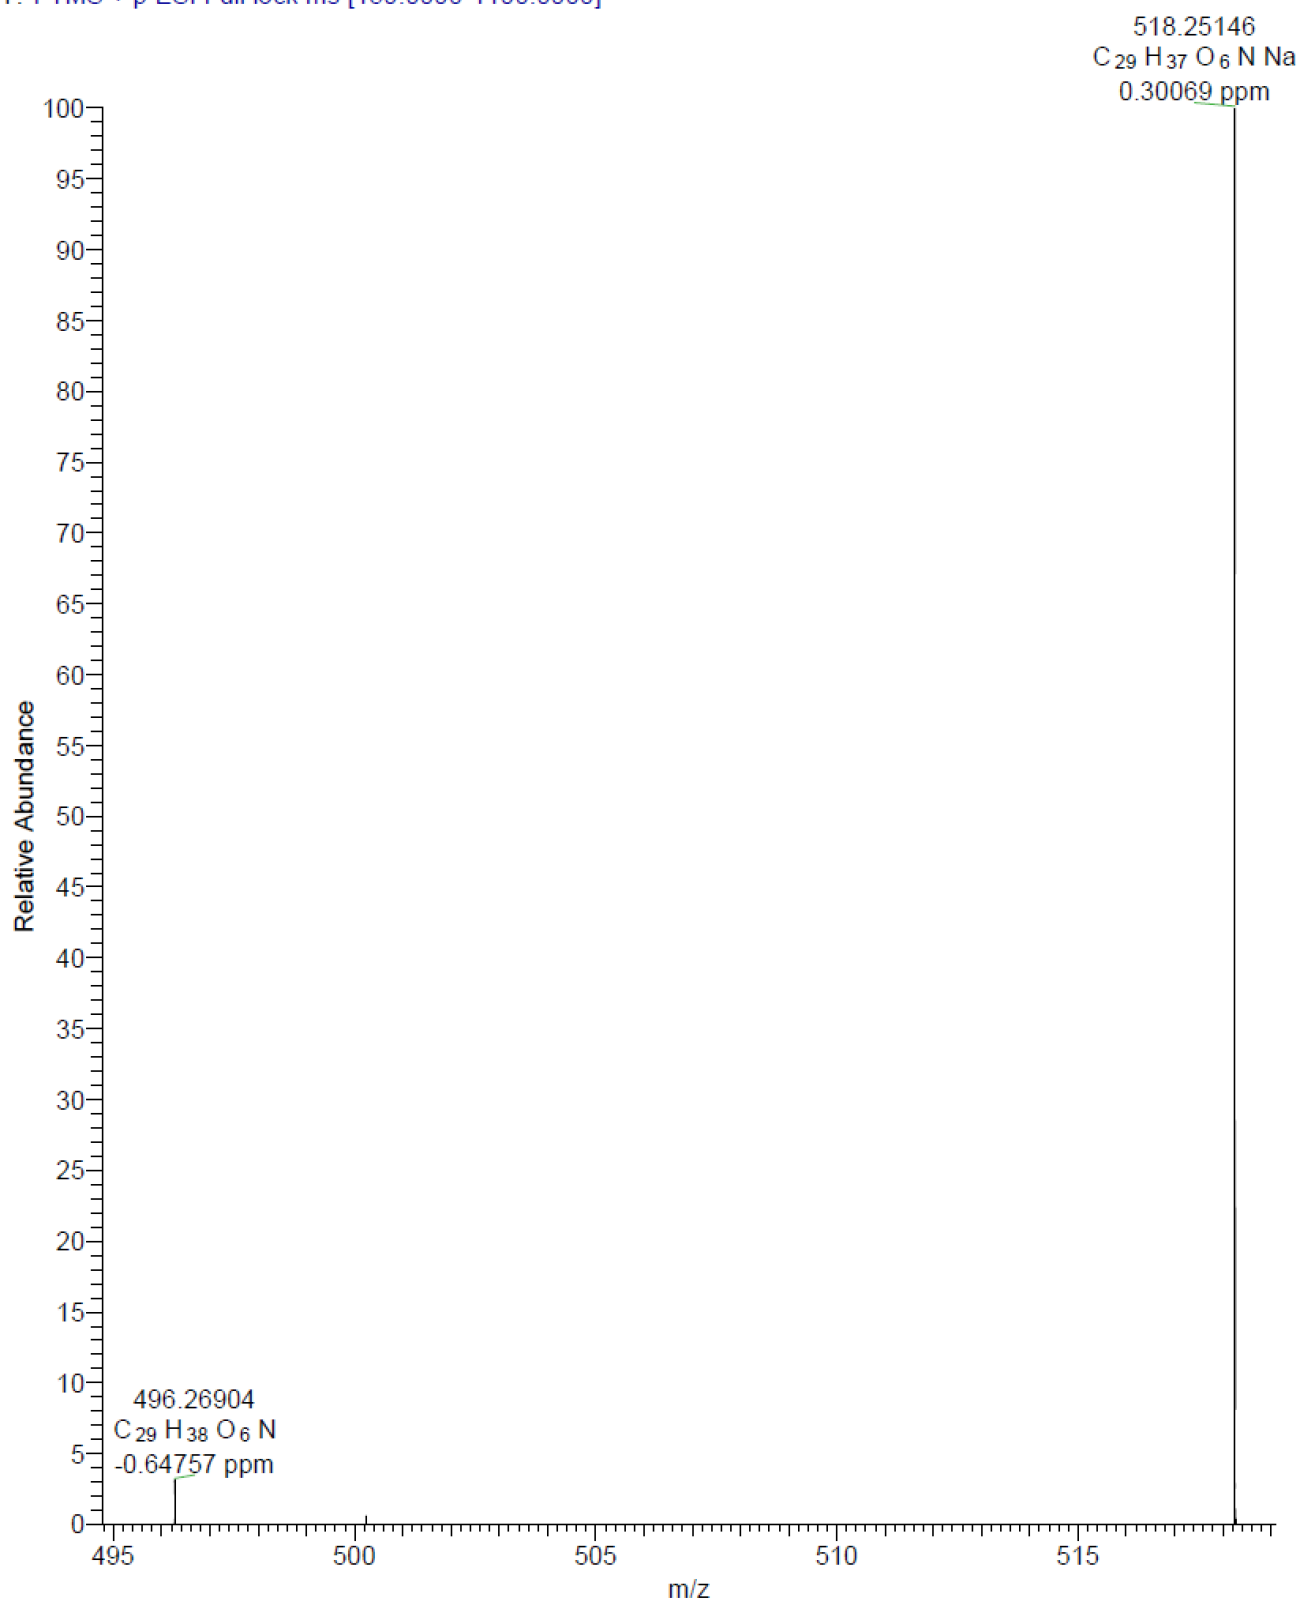

**Figure S15.**  $^1\text{H}$  NMR (600 MHz, methanol- $d_4$ ) spectrum of aspergicytochalasin C (**3**)

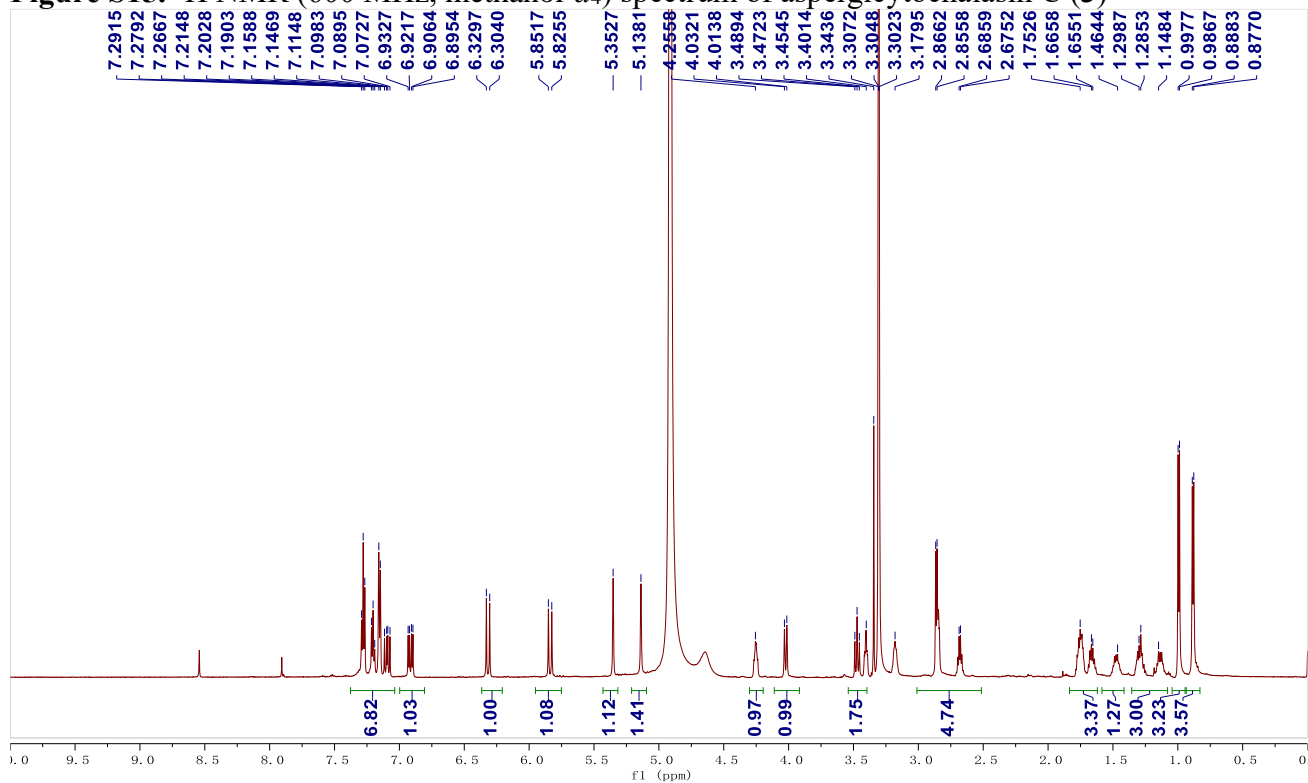

**Figure S16.**  $^{13}\text{C}$  NMR (150 MHz, methanol- $d_4$ ) spectrum of aspergicytochalasin C (**3**)

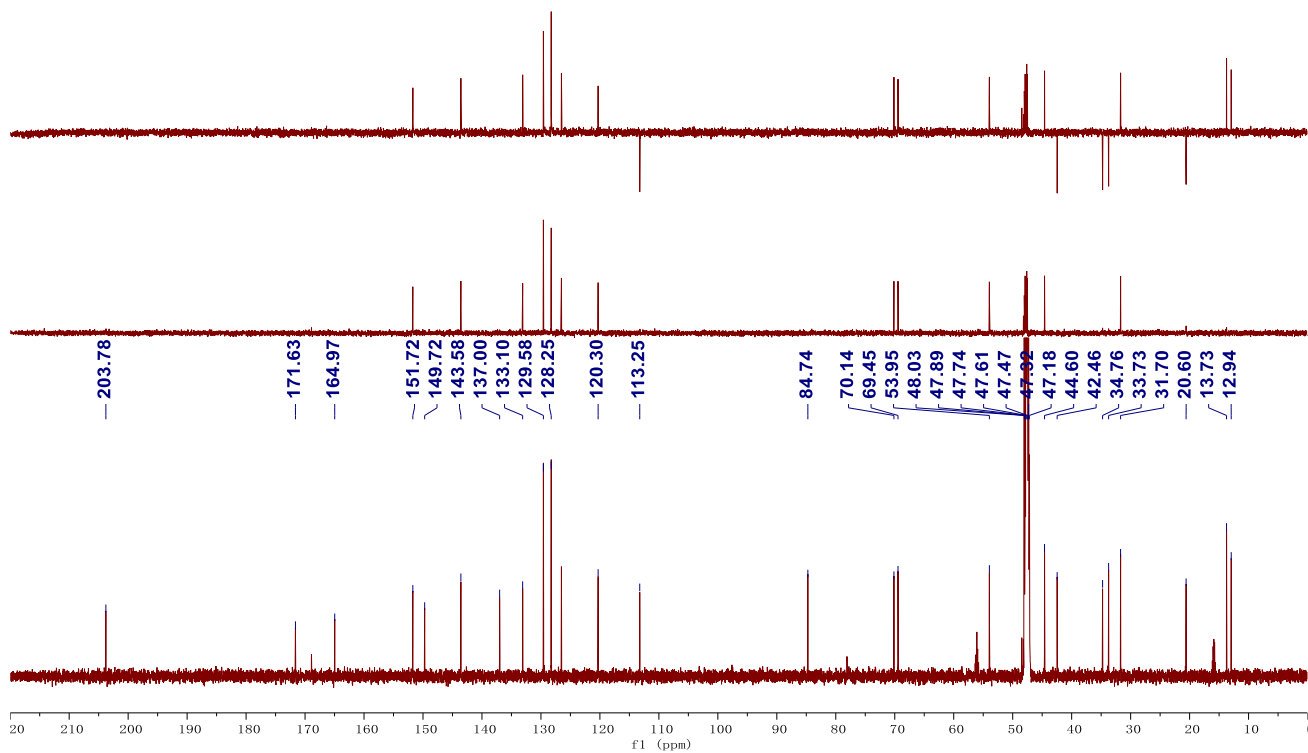

**Figure S17.** HSQC spectrum of aspergicytochalasin C (**3**)

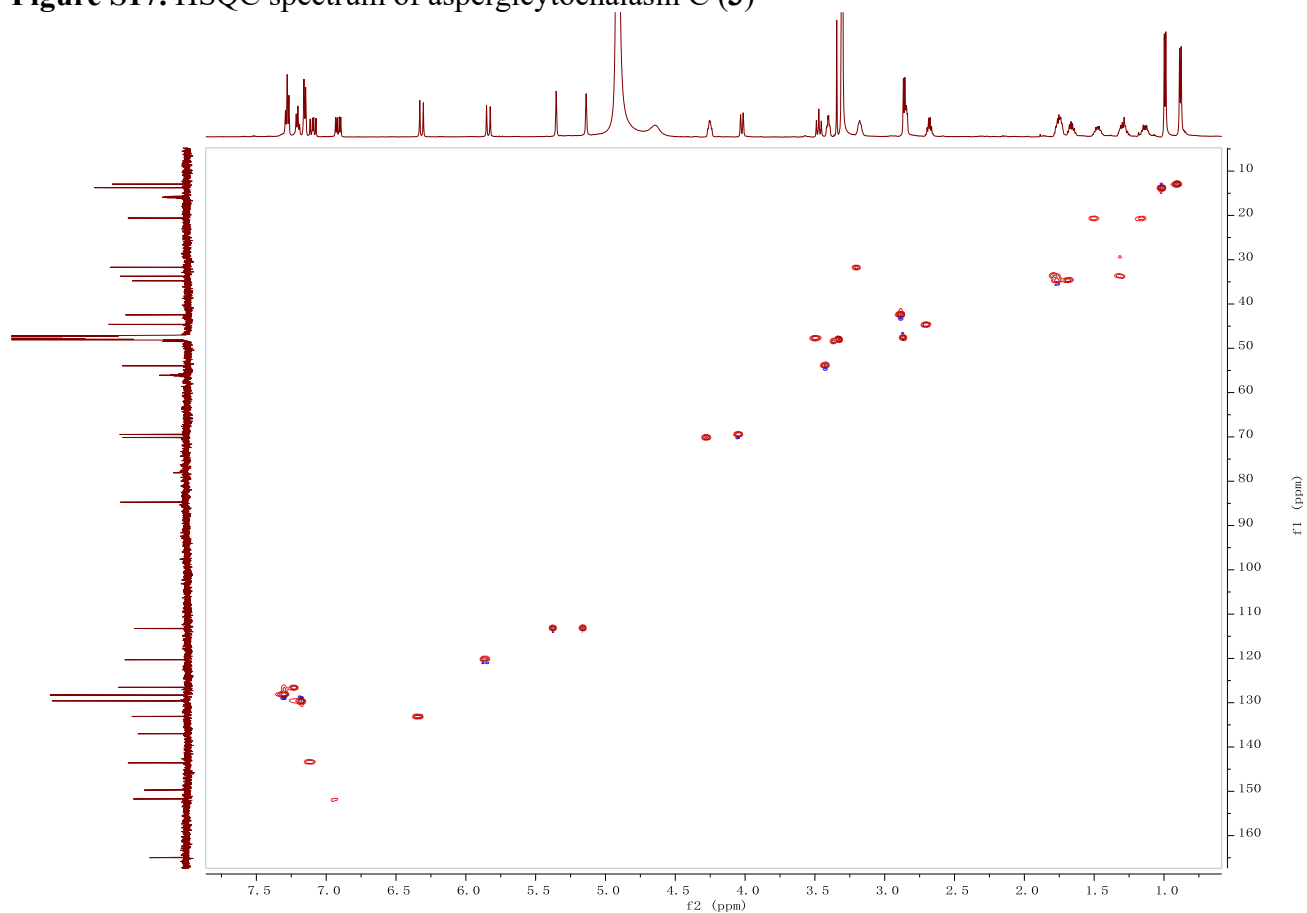

**Figure S18.** HMBC spectrum of aspergicytochalasin C (**3**)

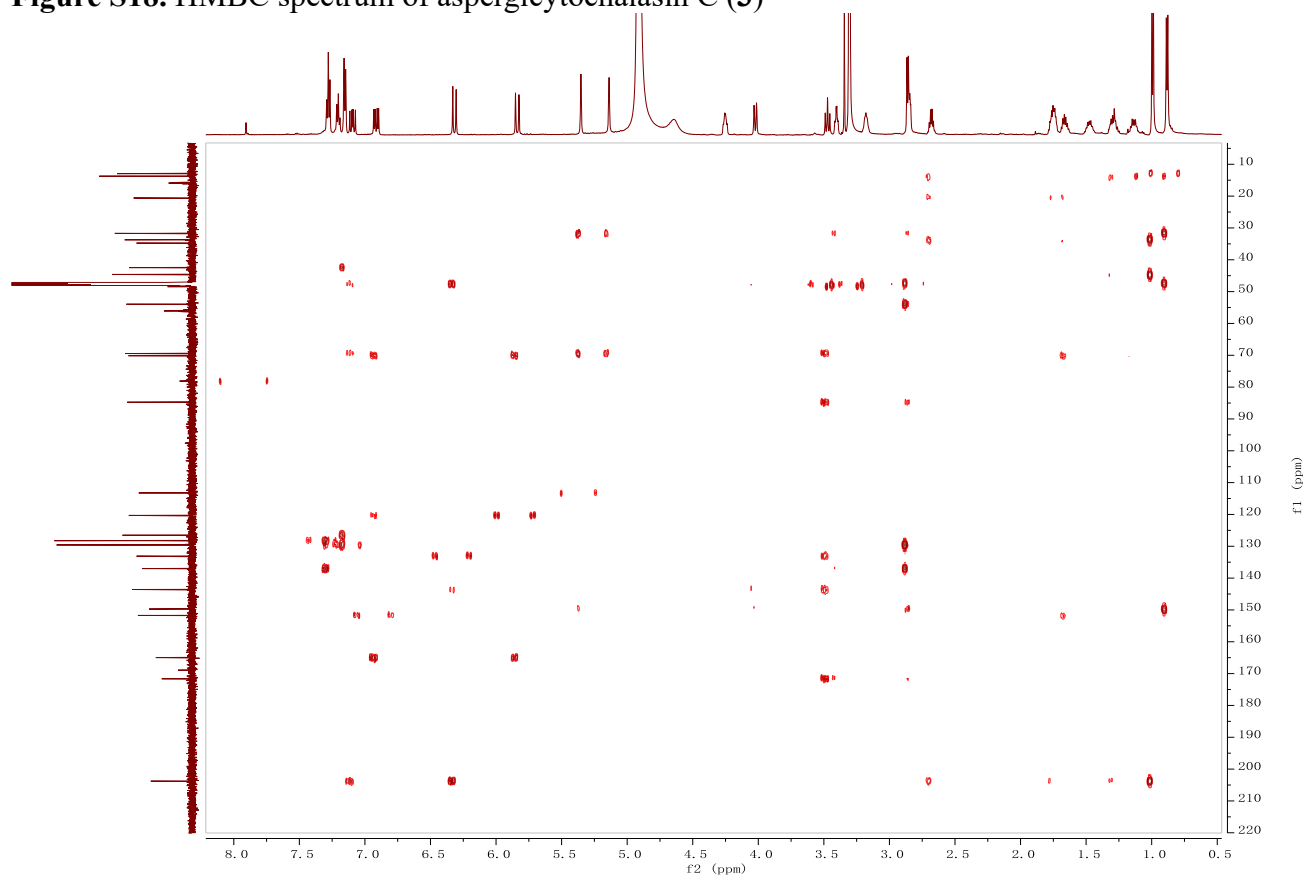

**Figure S19.**  $^1\text{H}$ - $^1\text{H}$  COSY spectrum of aspergicytochalasin C (**3**)

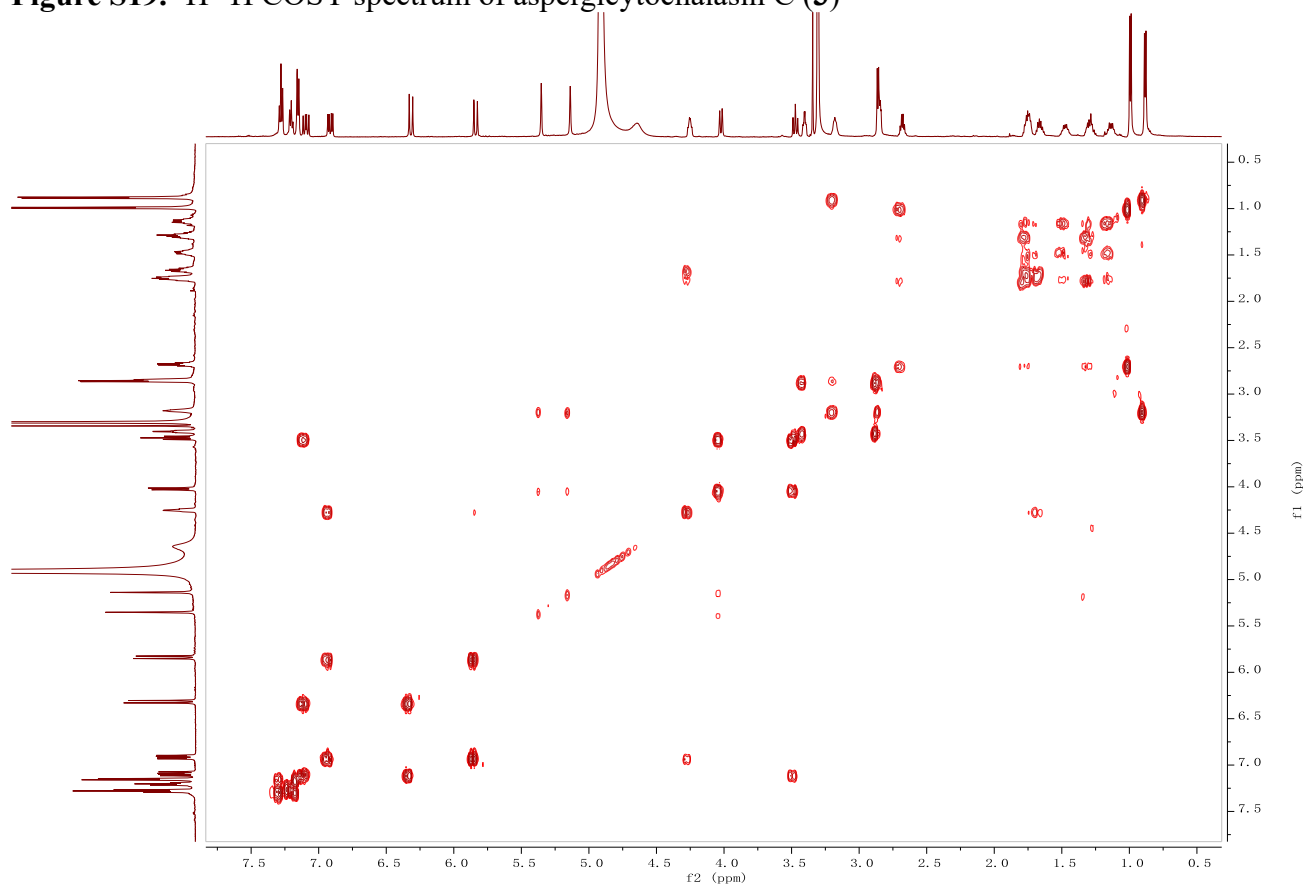

**Figure S20.** ROESY spectrum of aspergicytochalasin C (**3**)

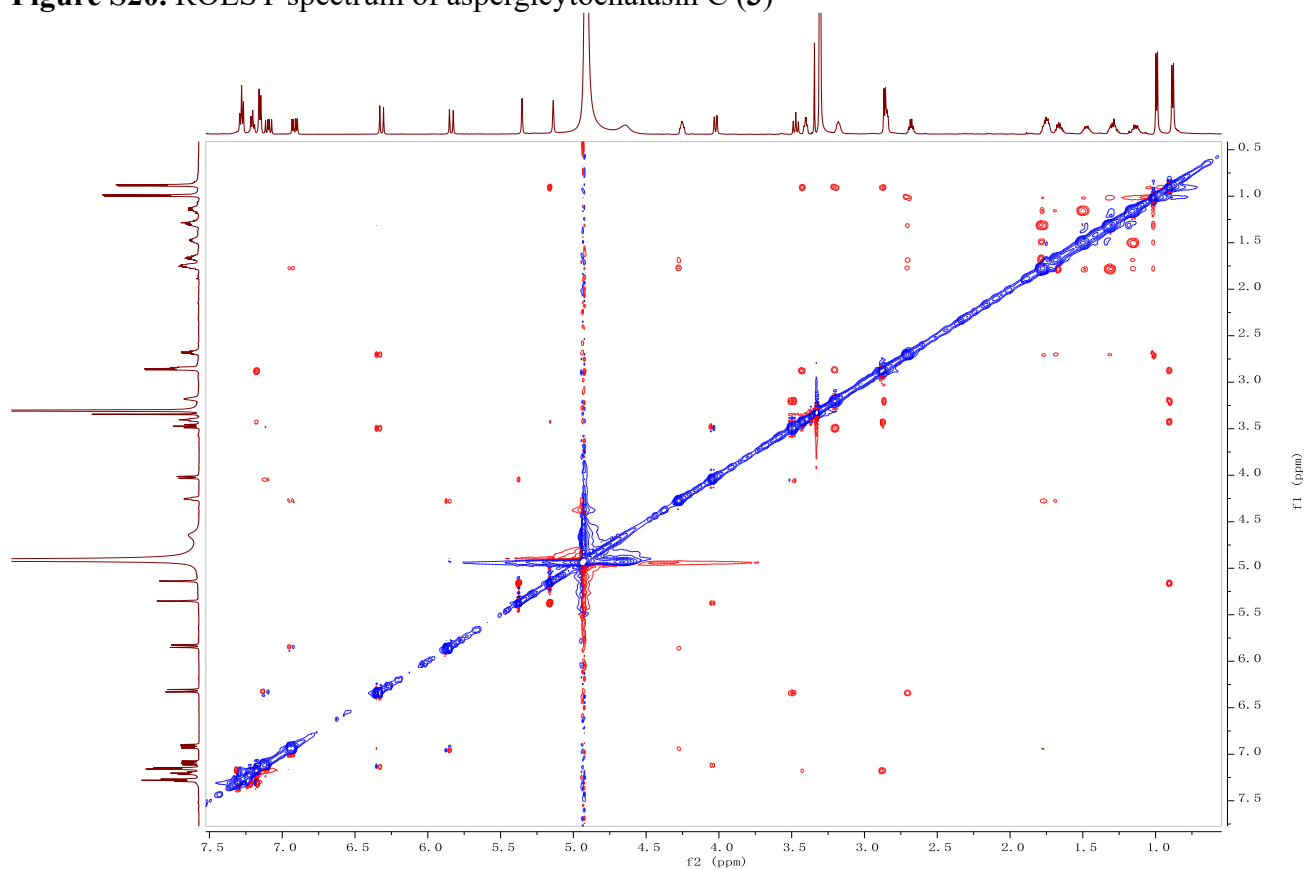

**Figure S21.** HRESIMS of aspergicytochalasin C (**3**)

T: FTMS + p ESI Full lock ms [150.0000-1100.0000]

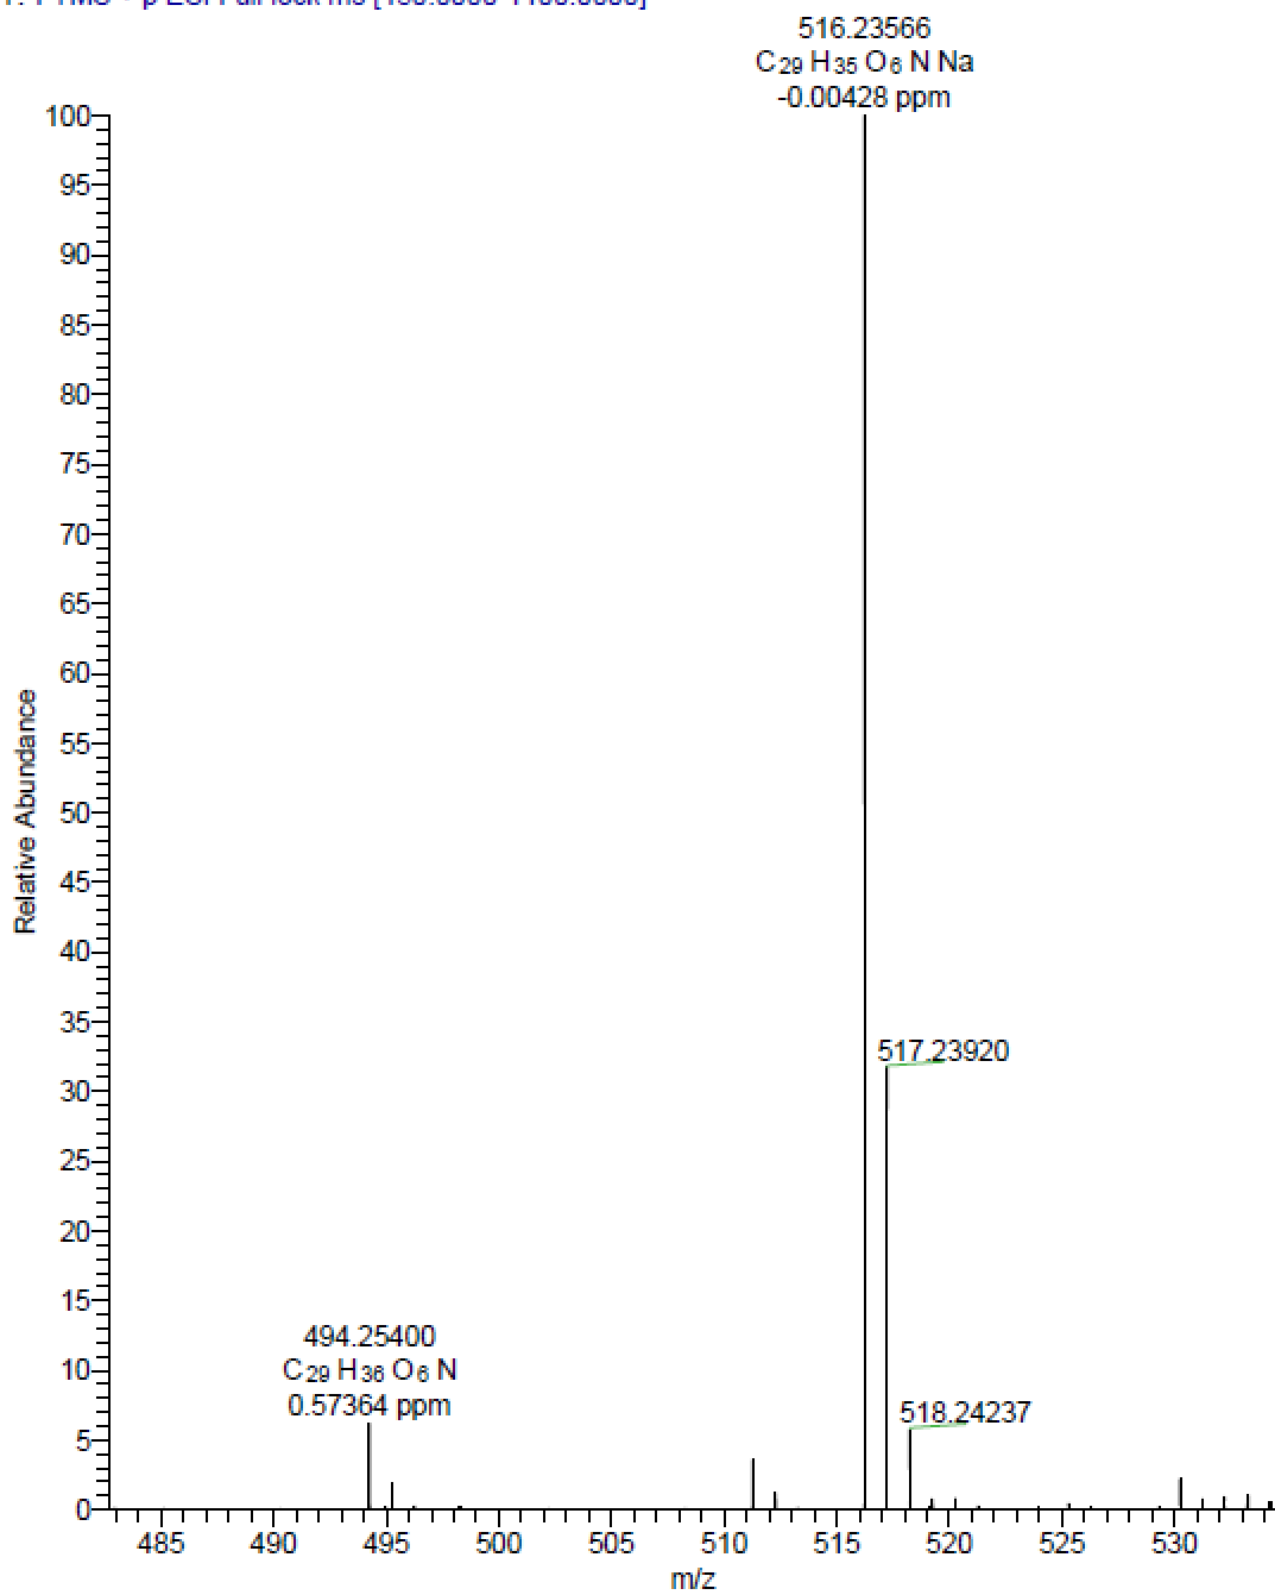

**Figure S22.**  $^1\text{H}$  NMR (600 MHz, methanol- $d_4$ ) spectrum of aspergicytochalasin D (**4**)

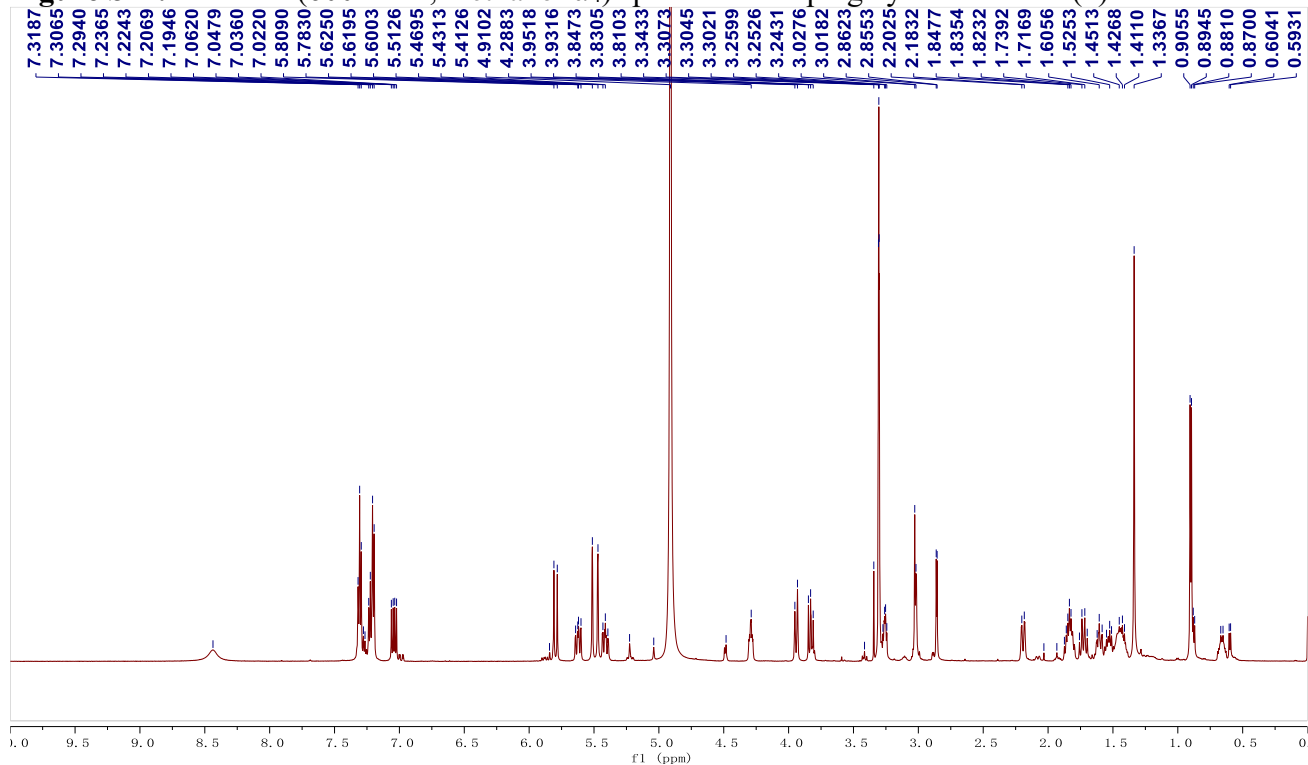

**Figure S23.**  $^{13}\text{C}$  NMR (150 MHz, methanol- $d_4$ ) spectrum of aspergicytochalasin D (**4**)

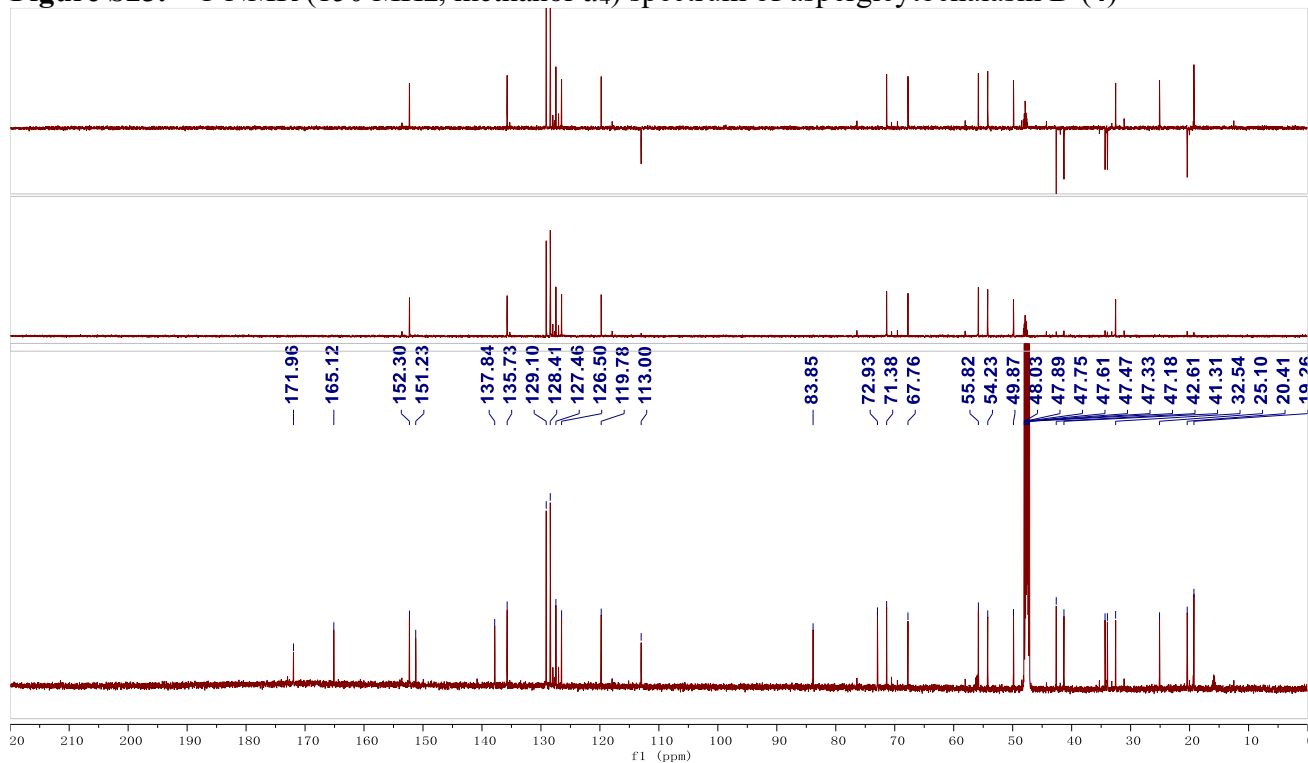

**Figure S24.** HSQC spectrum of aspergicytochalasin D (**4**)

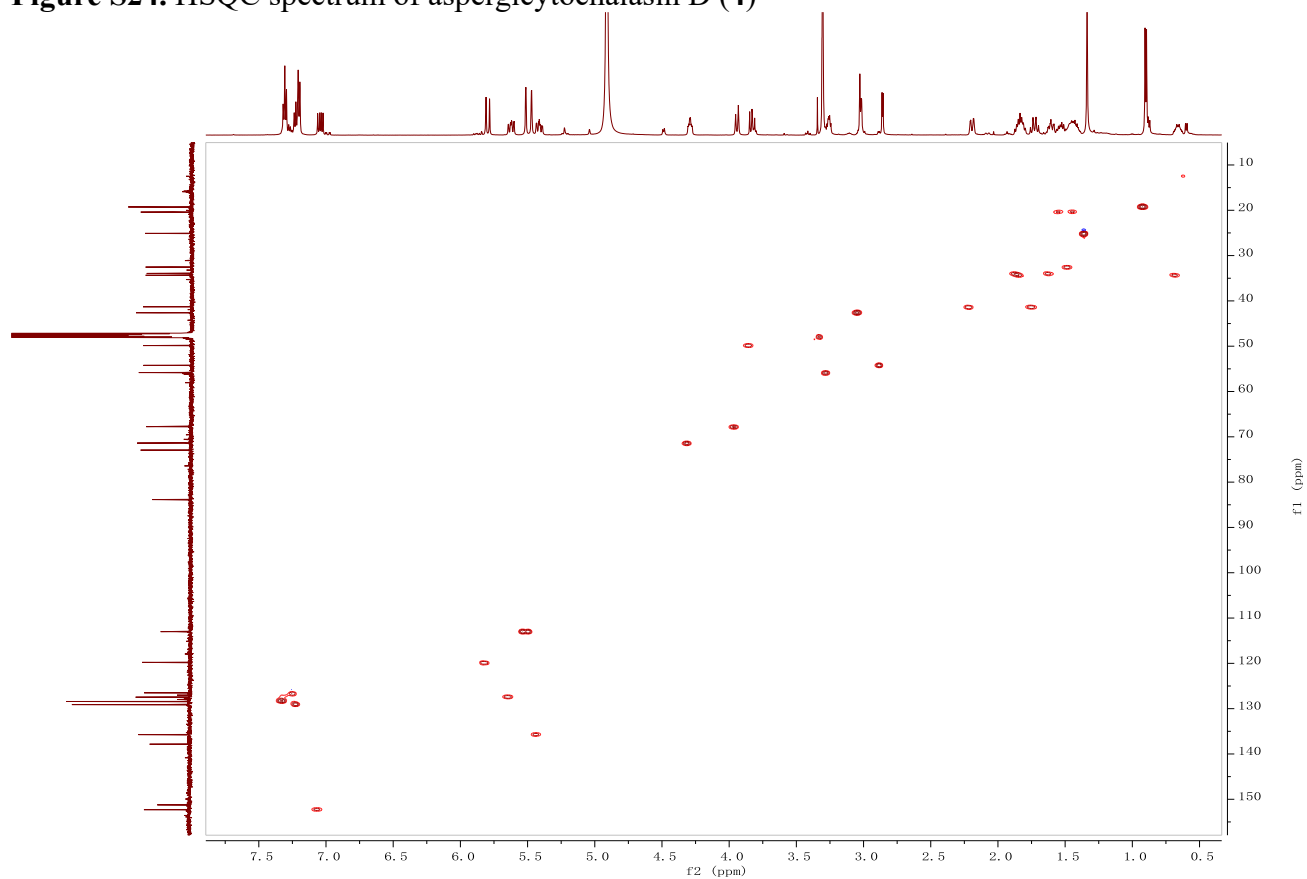

**Figure S25.** HMBC spectrum of aspergicytochalasin D (**4**)

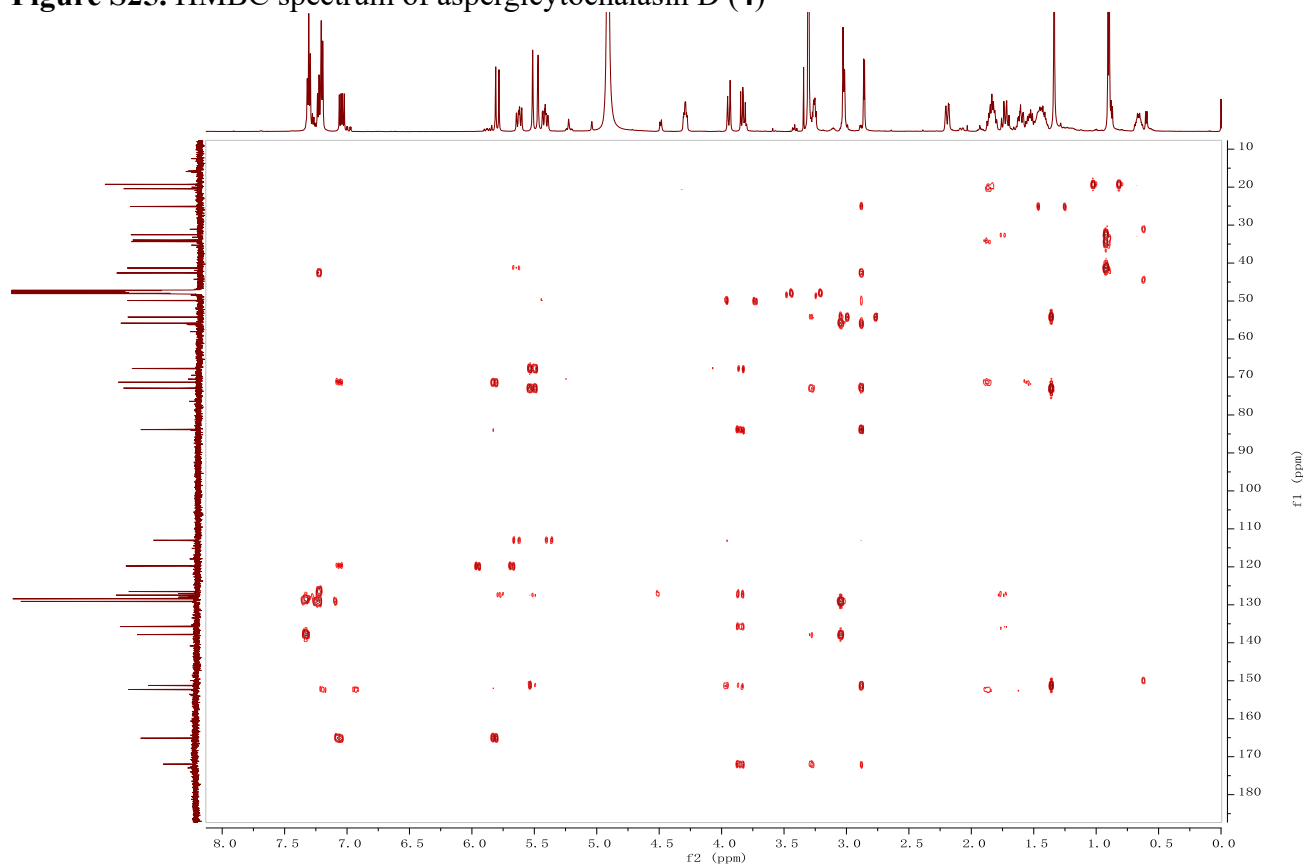

**Figure S26.**  $^1\text{H}$ - $^1\text{H}$  COSY spectrum of aspergicytochalasin D (**4**)

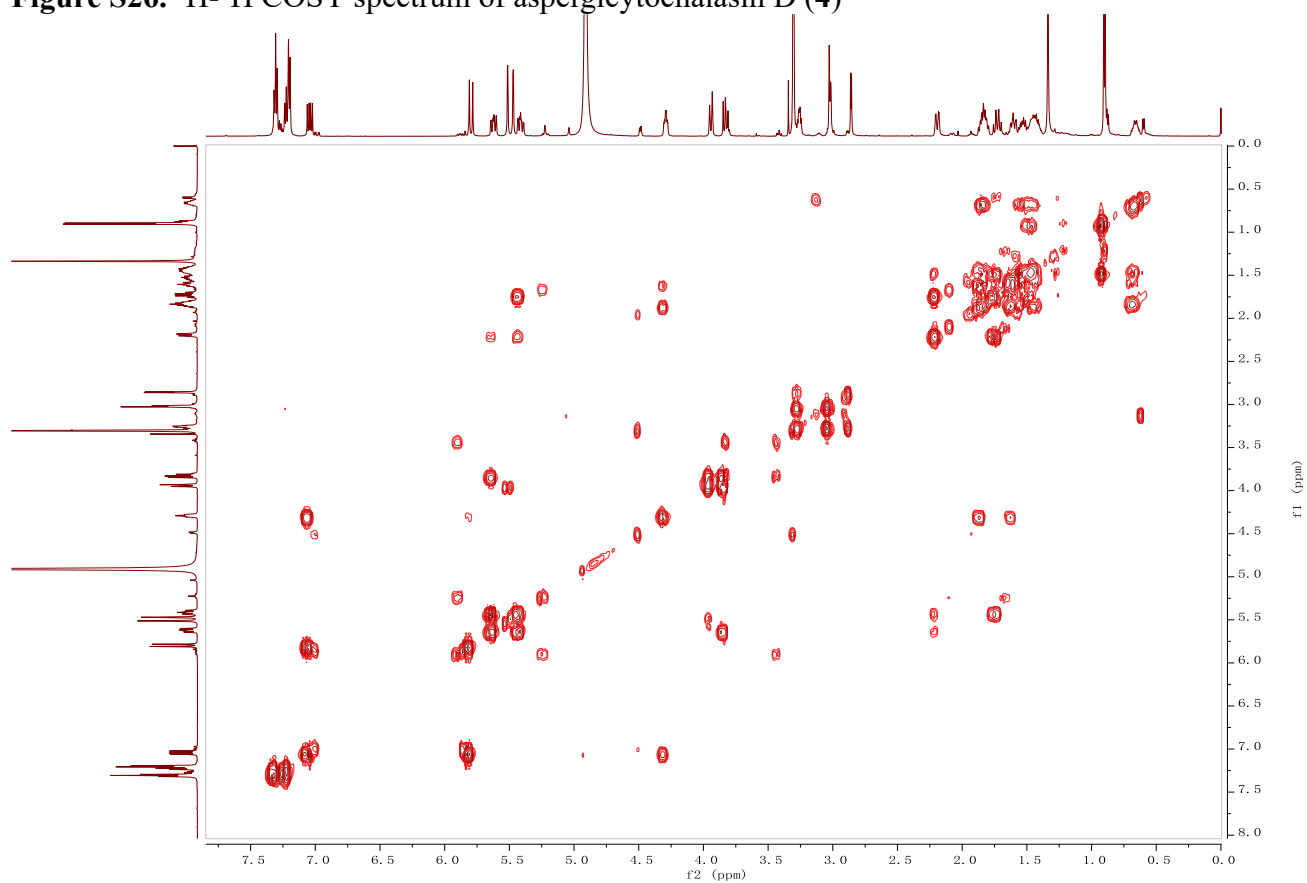

**Figure S27.** ROESY spectrum of aspergicytochalasin D (**4**)

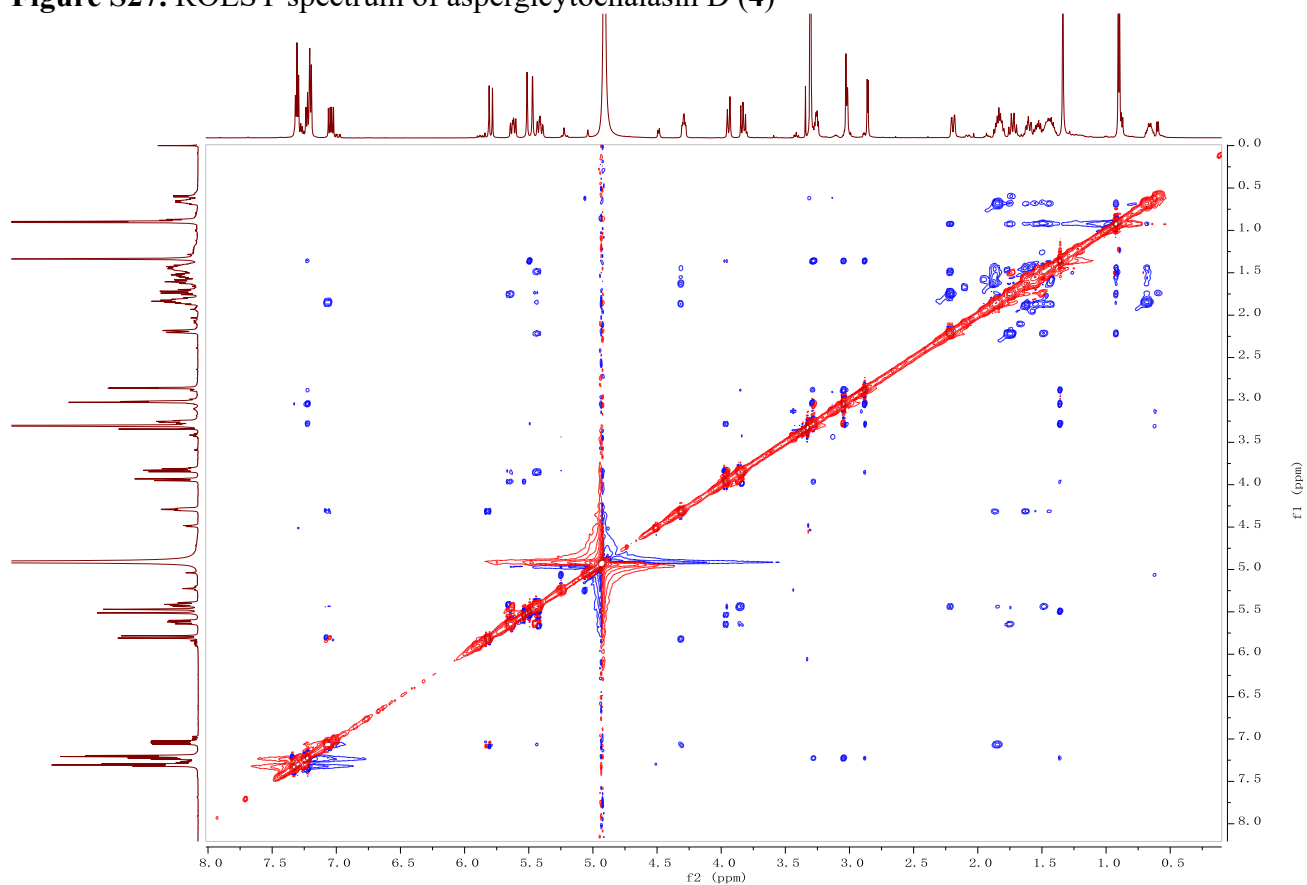

**Figure S28.** HRESIMS of aspergicytochalasin D (**4**)

Γ: FTMS + p ESI Full lock ms [150.0000-1100.0000]

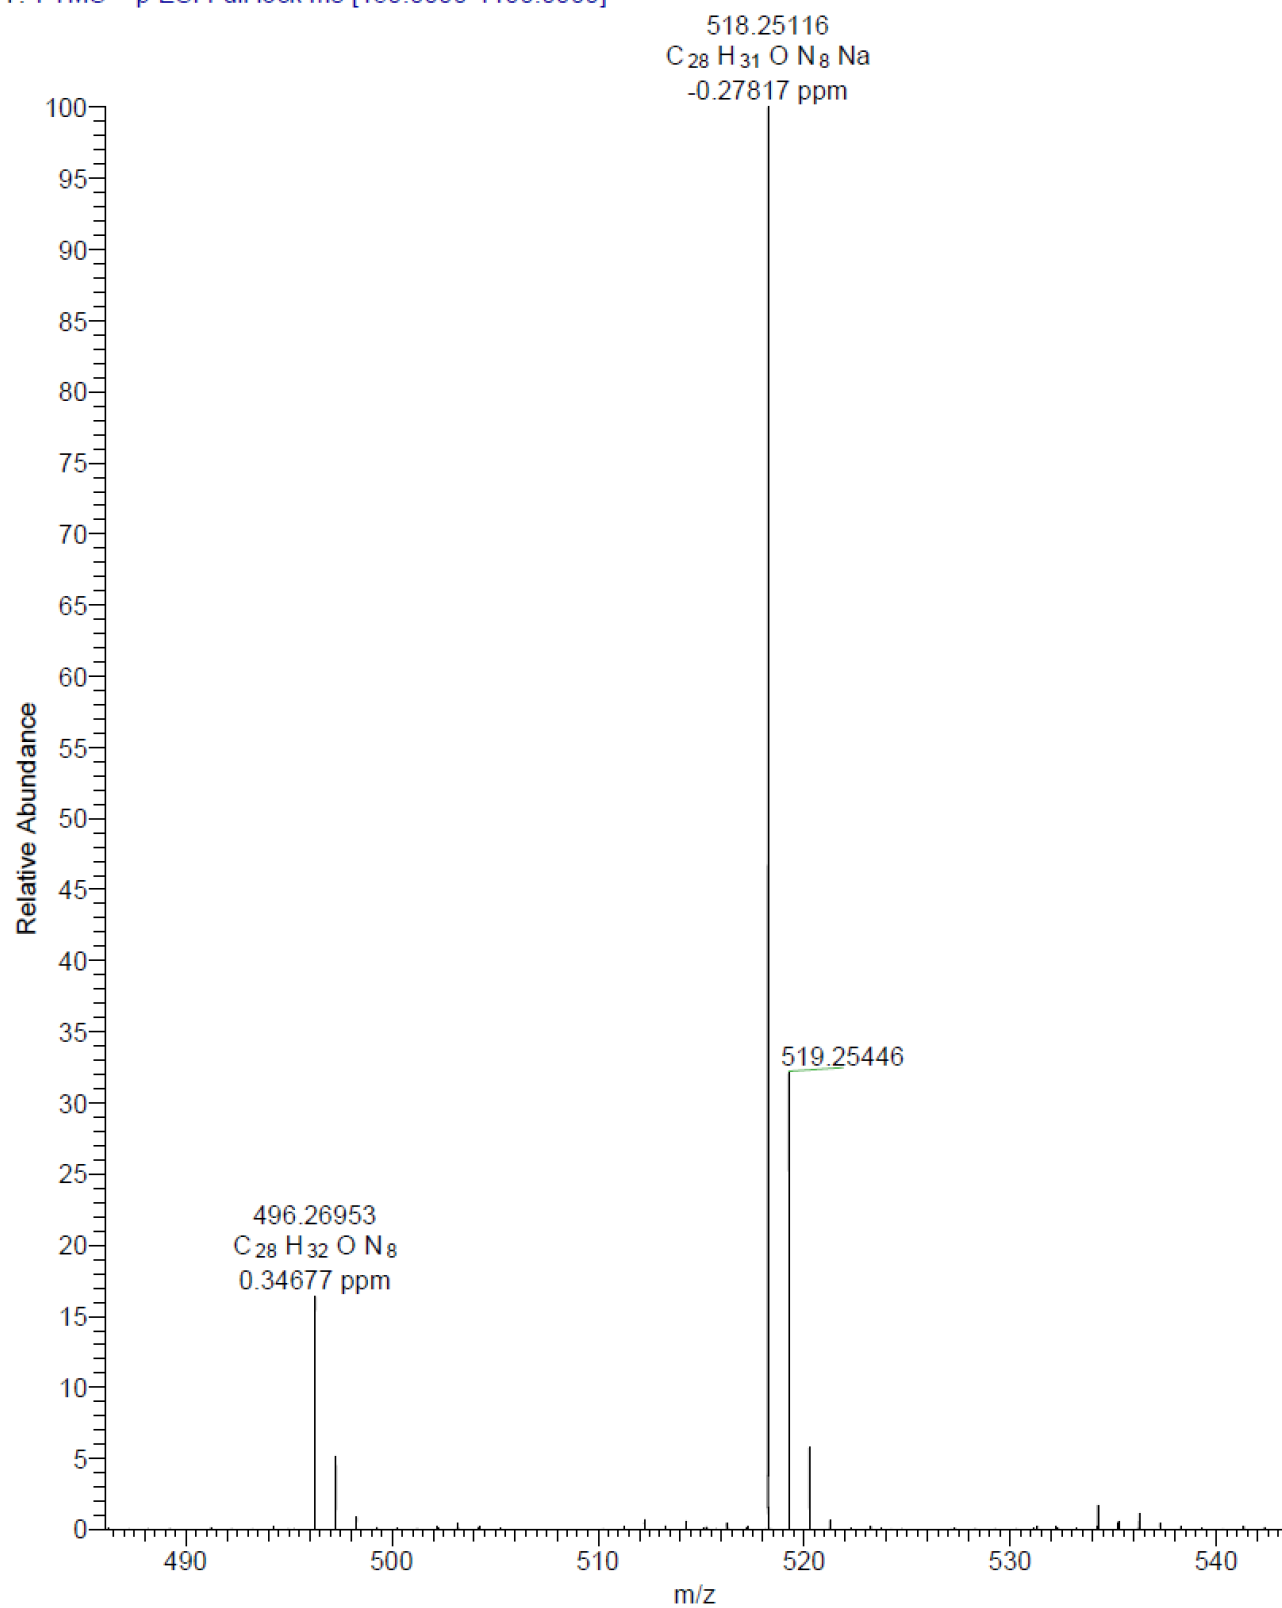

**Figure S29.**  $^1\text{H}$  NMR (600 MHz,  $\text{CDCl}_3$ ) spectrum of aspergicytochalasin E (**5**)

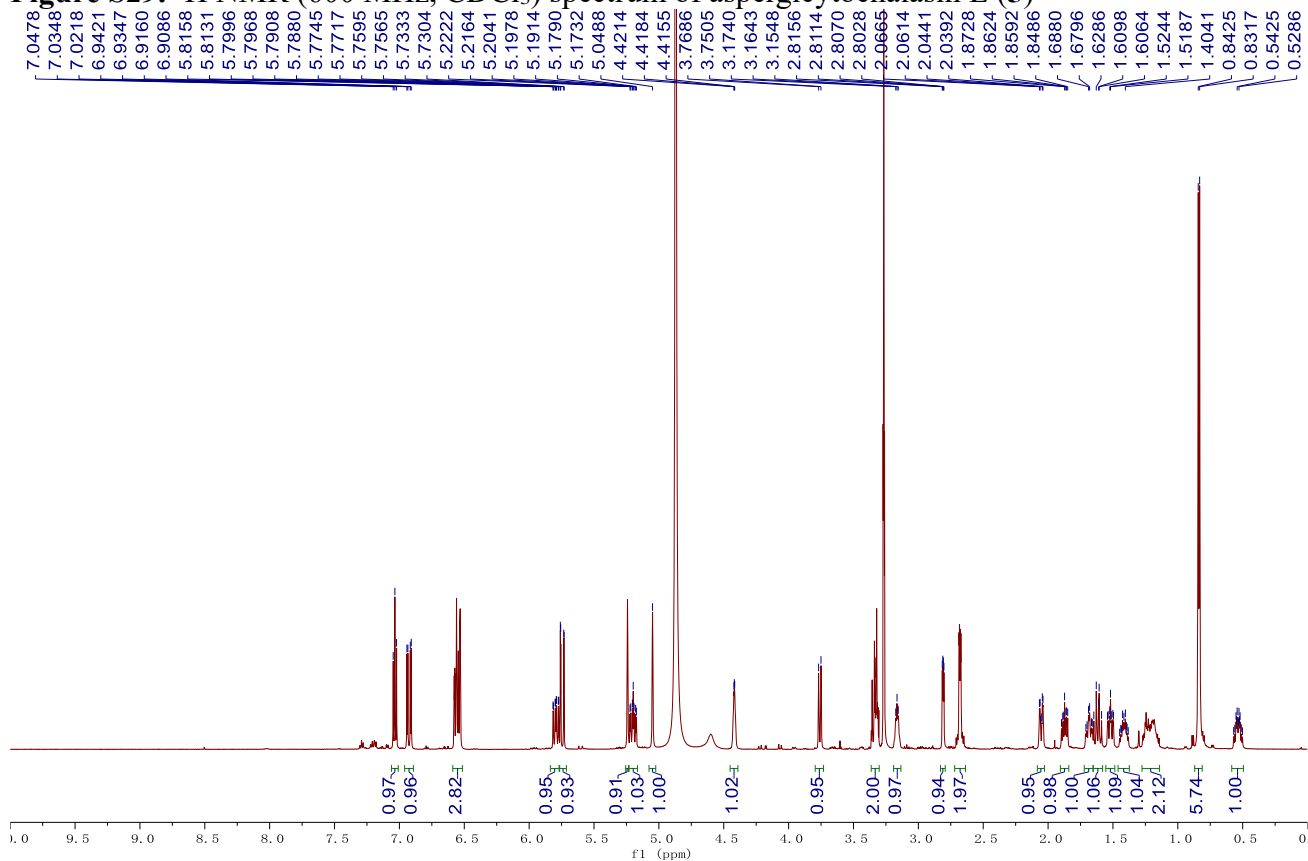

**Figure S30.**  $^{13}\text{C}$  NMR (150 MHz,  $\text{CDCl}_3$ ) spectrum of aspergicytochalasin E (**5**)

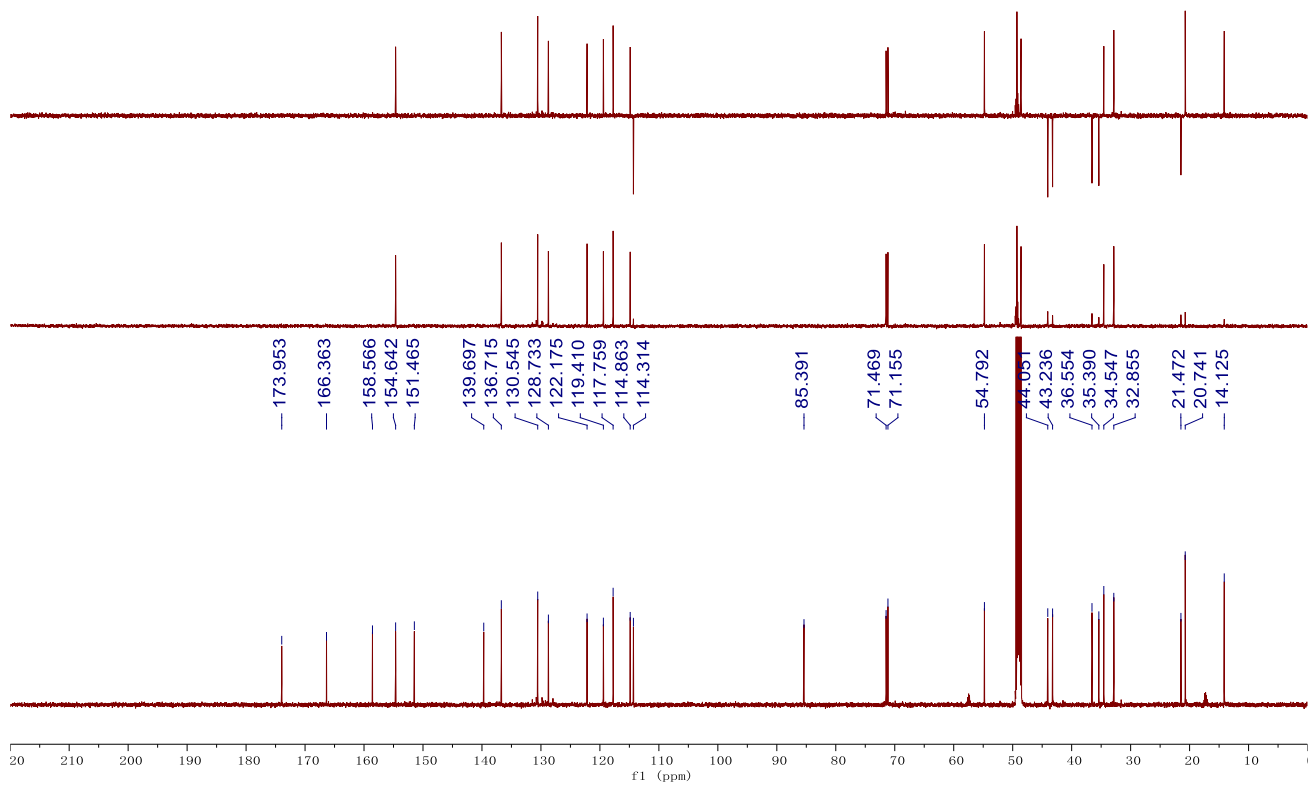

**Figure S31.** HSQC spectrum of aspergicytochalasin E (**5**)

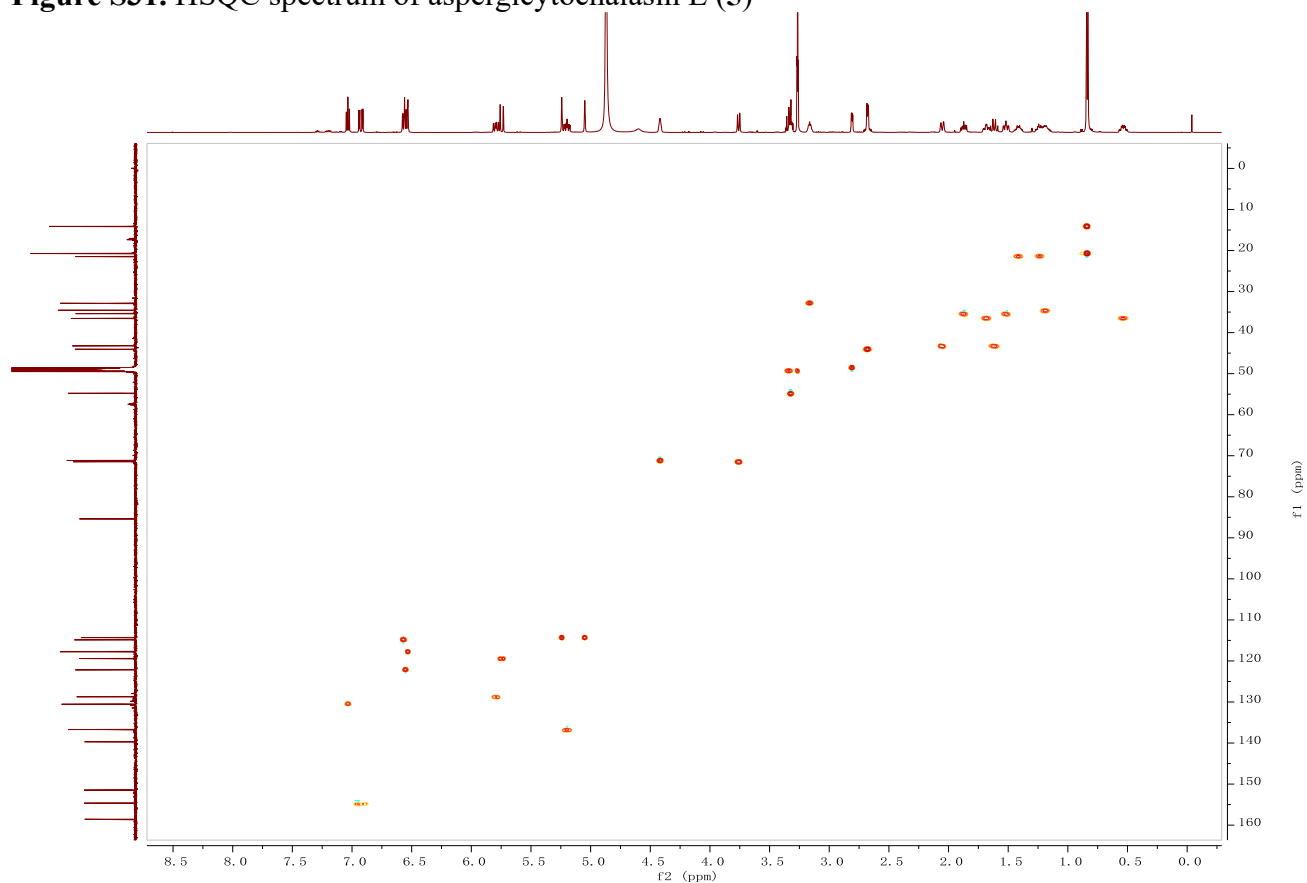

**Figure S32.** HMBC spectrum of aspergicytochalasin E (**5**)

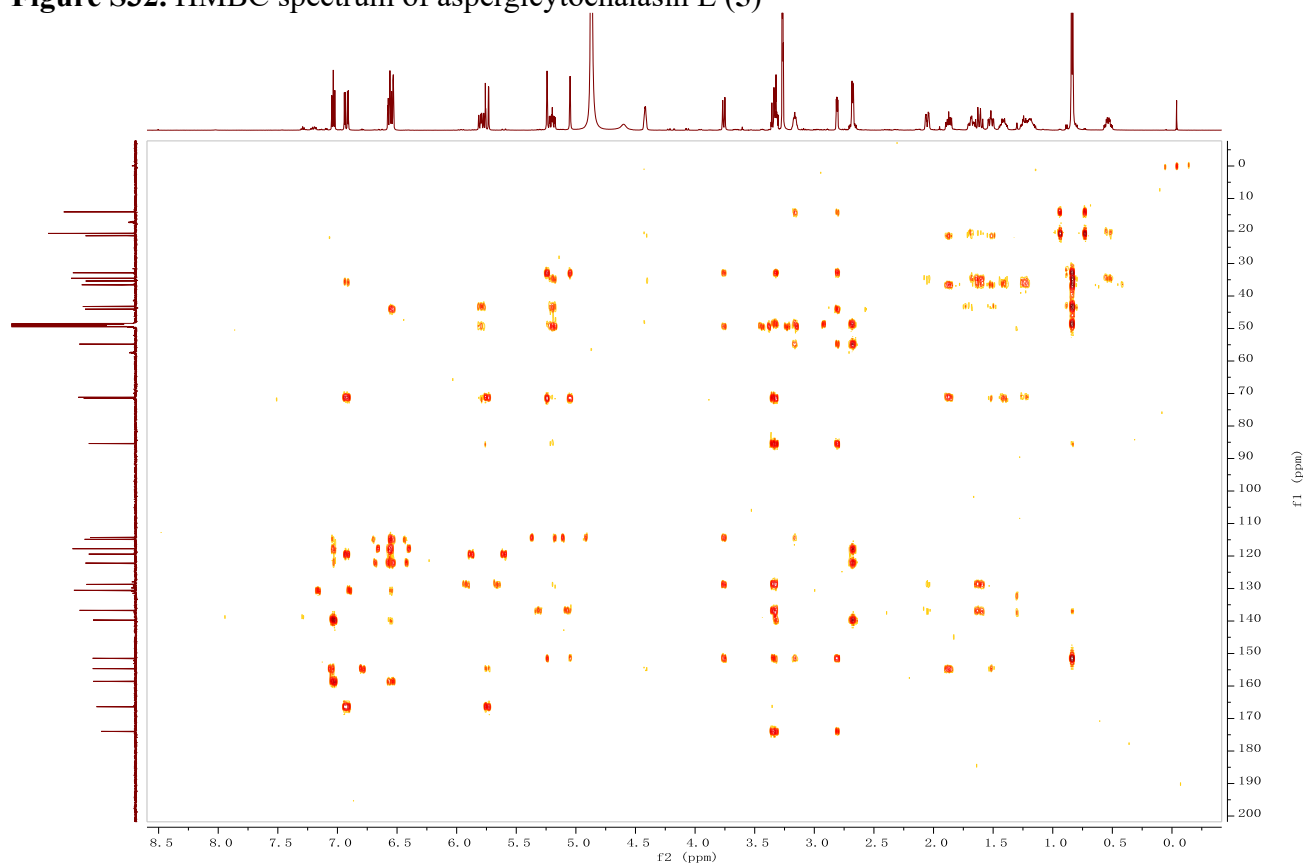

**Figure S33.**  $^1\text{H}$ - $^1\text{H}$  COSY spectrum of aspergicytochalasin E (**5**)

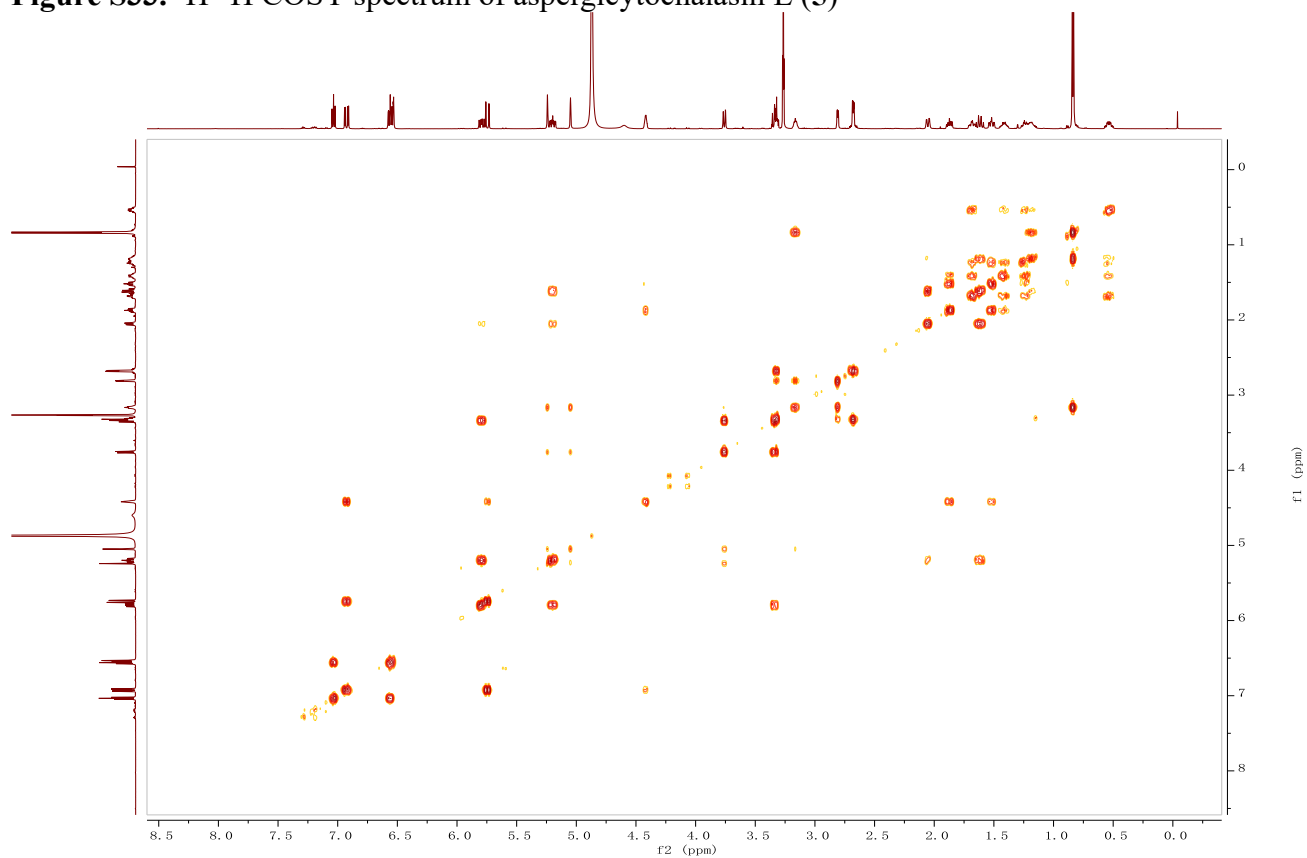

**Figure S34.** ROESY spectrum of aspergicytochalasin E (**5**)

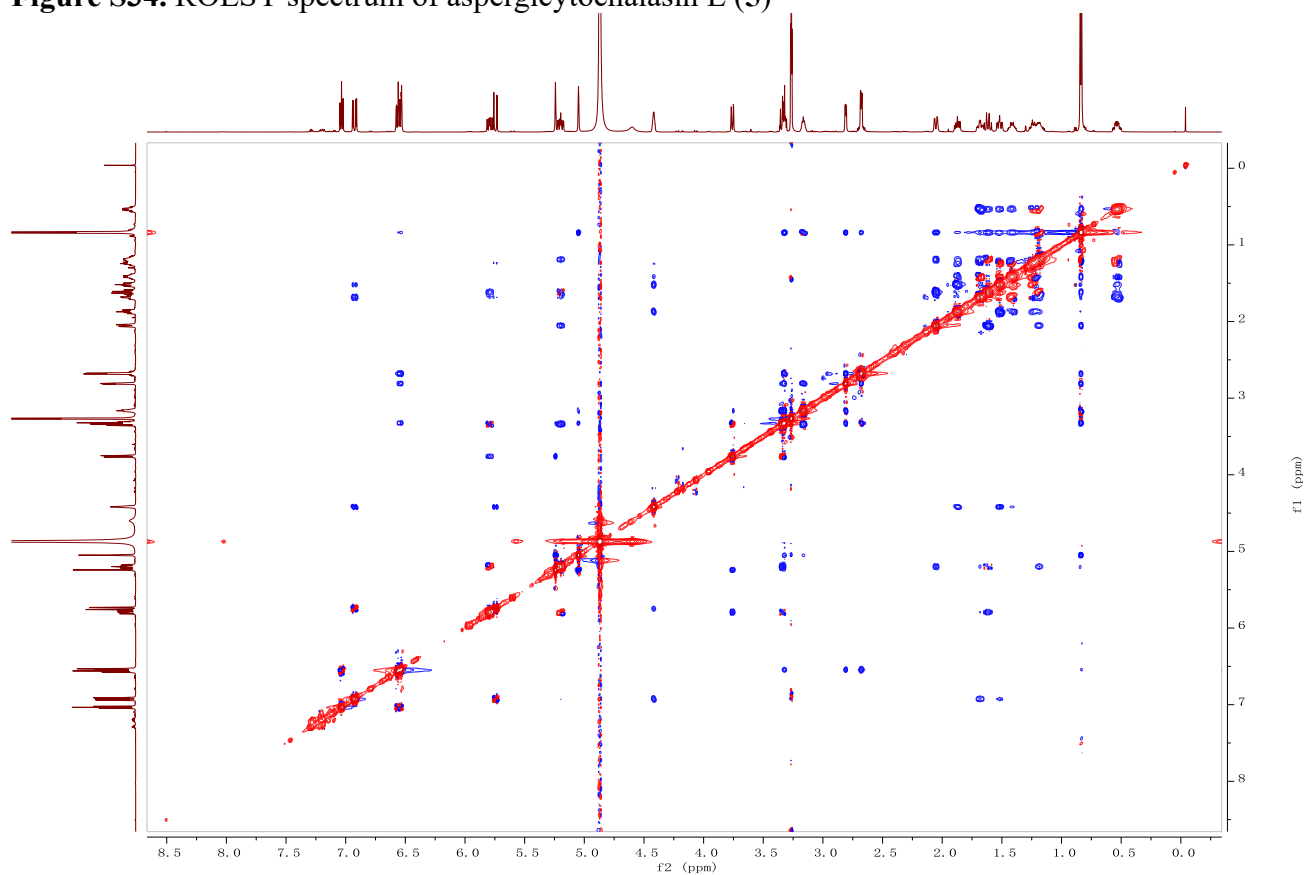

**Figure S35.** HRESIMS of aspergicytochalasin E (**5**)

T: FTMS + p ESI Full lock ms [150.0000-1100.0000]

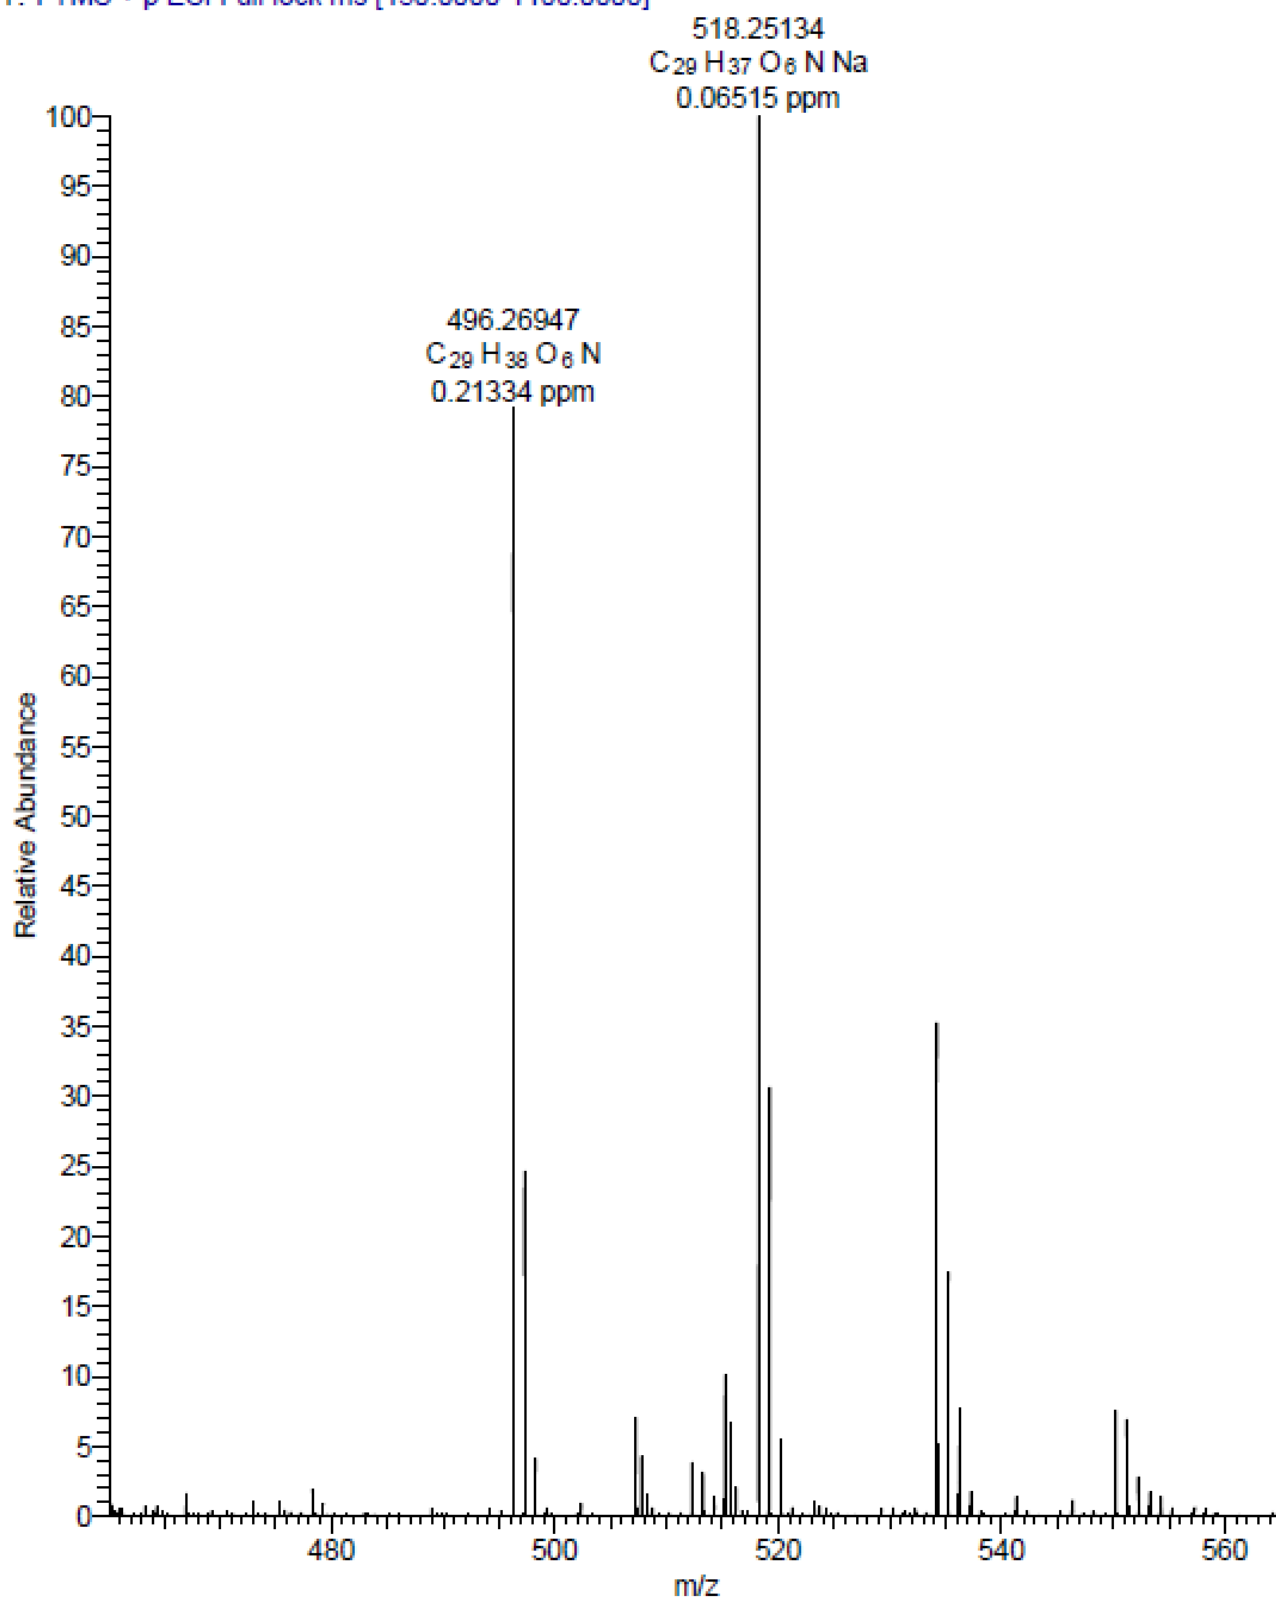

**Figure S36.**  $^1\text{H}$  NMR (600 MHz, methanol- $d_4$ ) spectrum of aspergicytochalasin F (6)

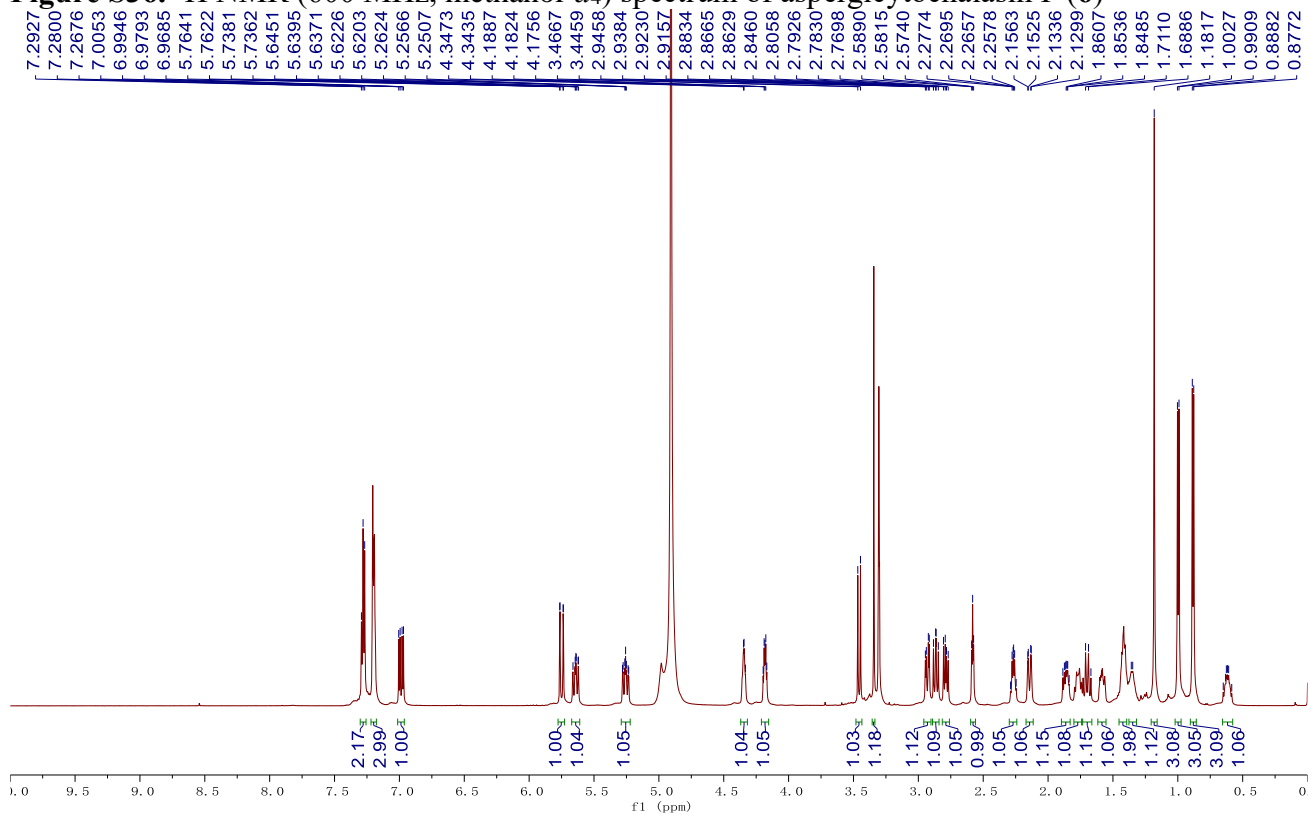

**Figure S37.**  $^{13}\text{C}$  NMR (150 MHz, methanol- $d_4$ ) spectrum of aspergicytochalasin F (6)

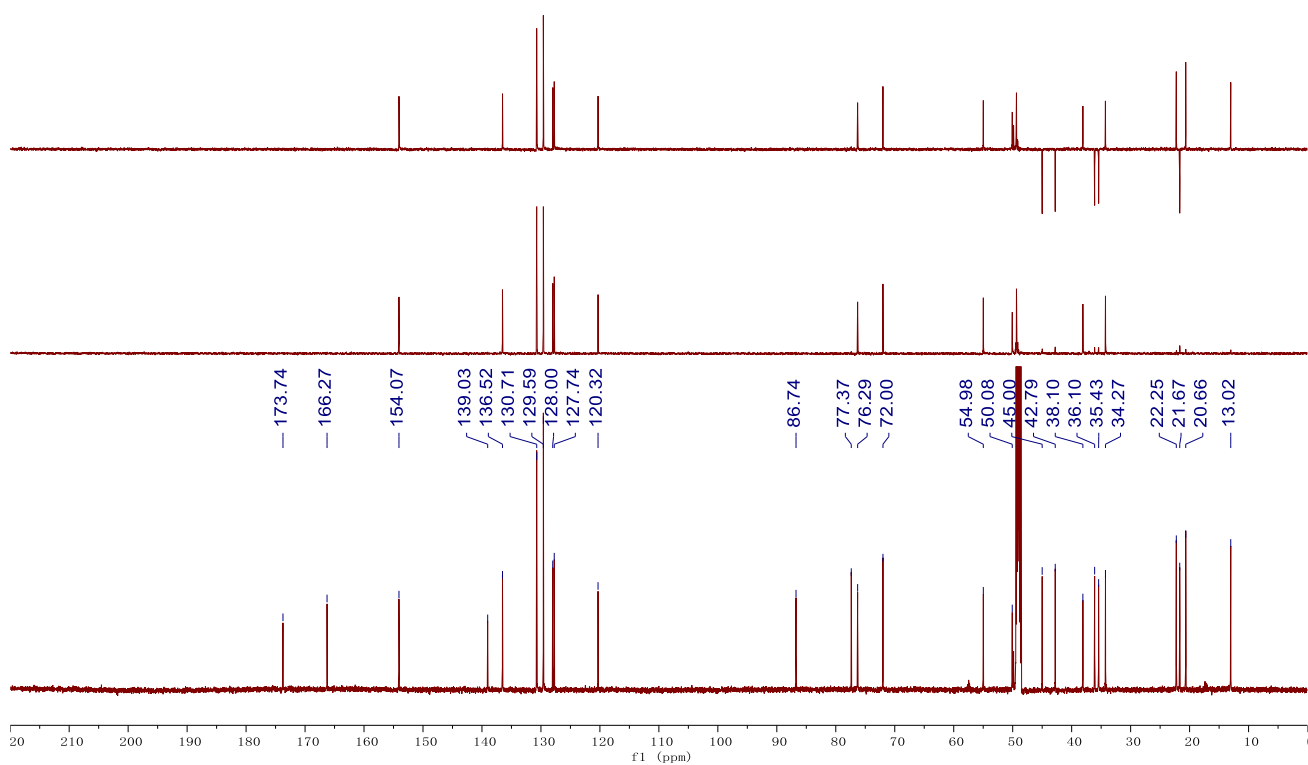

**Figure S38.** HSQC spectrum of aspergicytochalasin F (**6**)

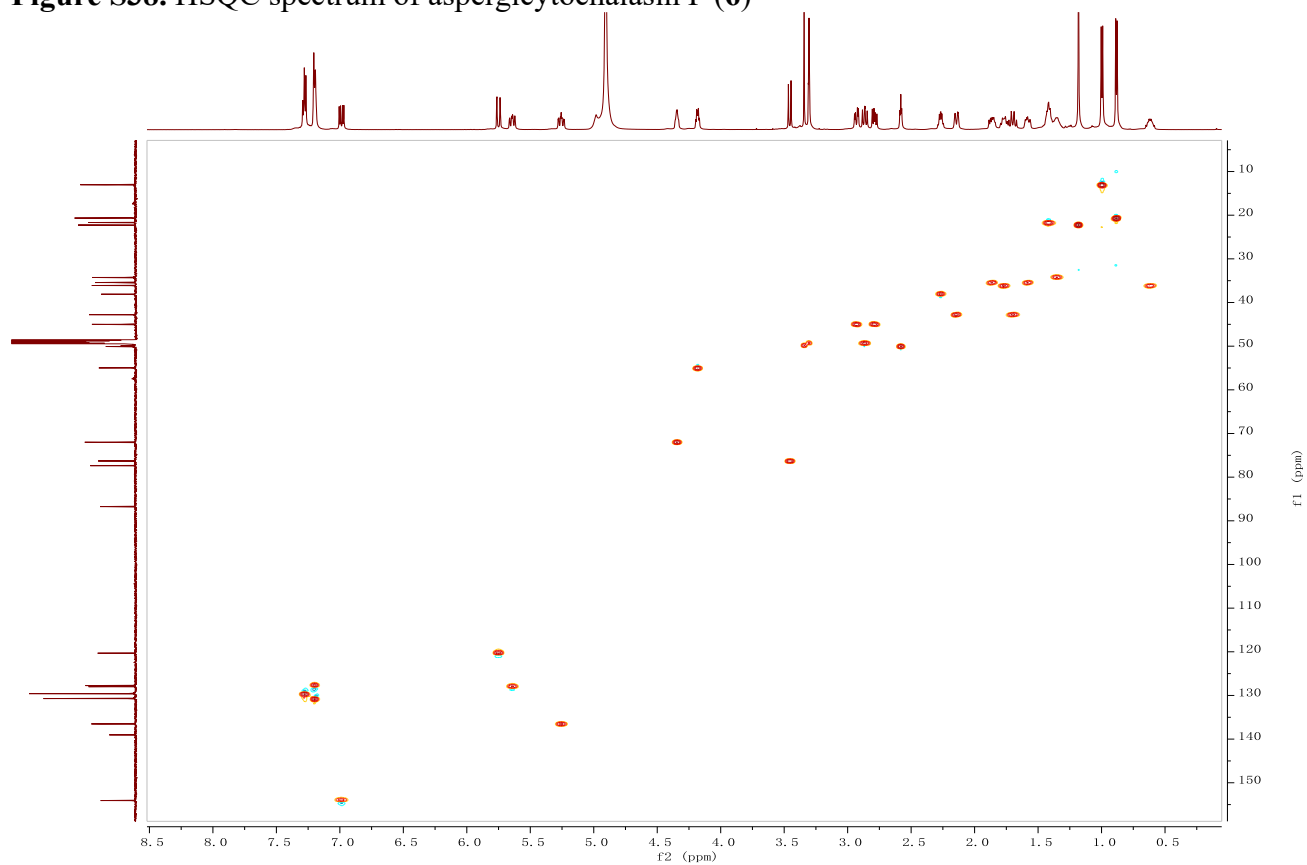

**Figure S39.** HMBC spectrum of aspergicytochalasin F (**6**)

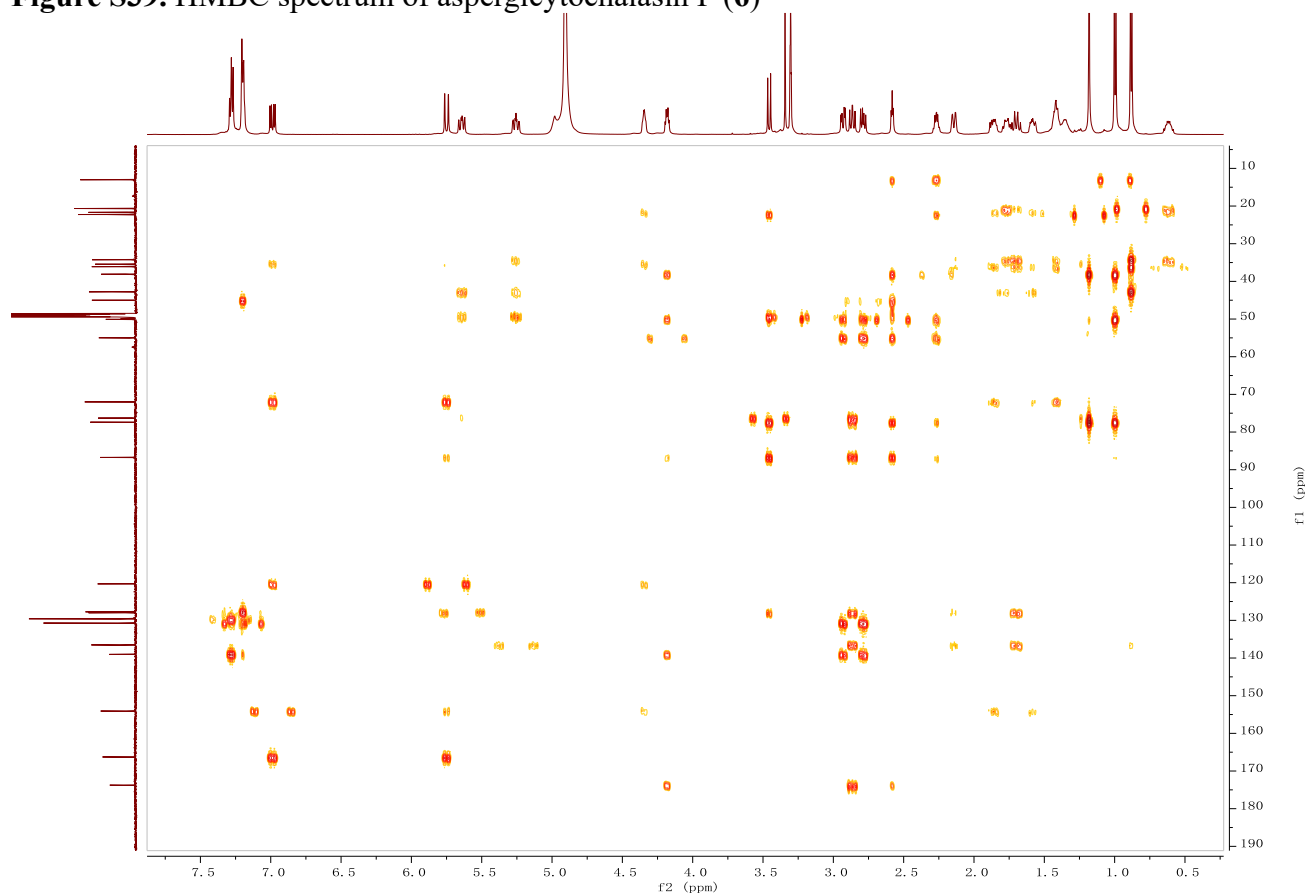

**Figure S40.**  $^1\text{H}$ - $^1\text{H}$  COSY spectrum of aspergicytochalasin F (**6**)

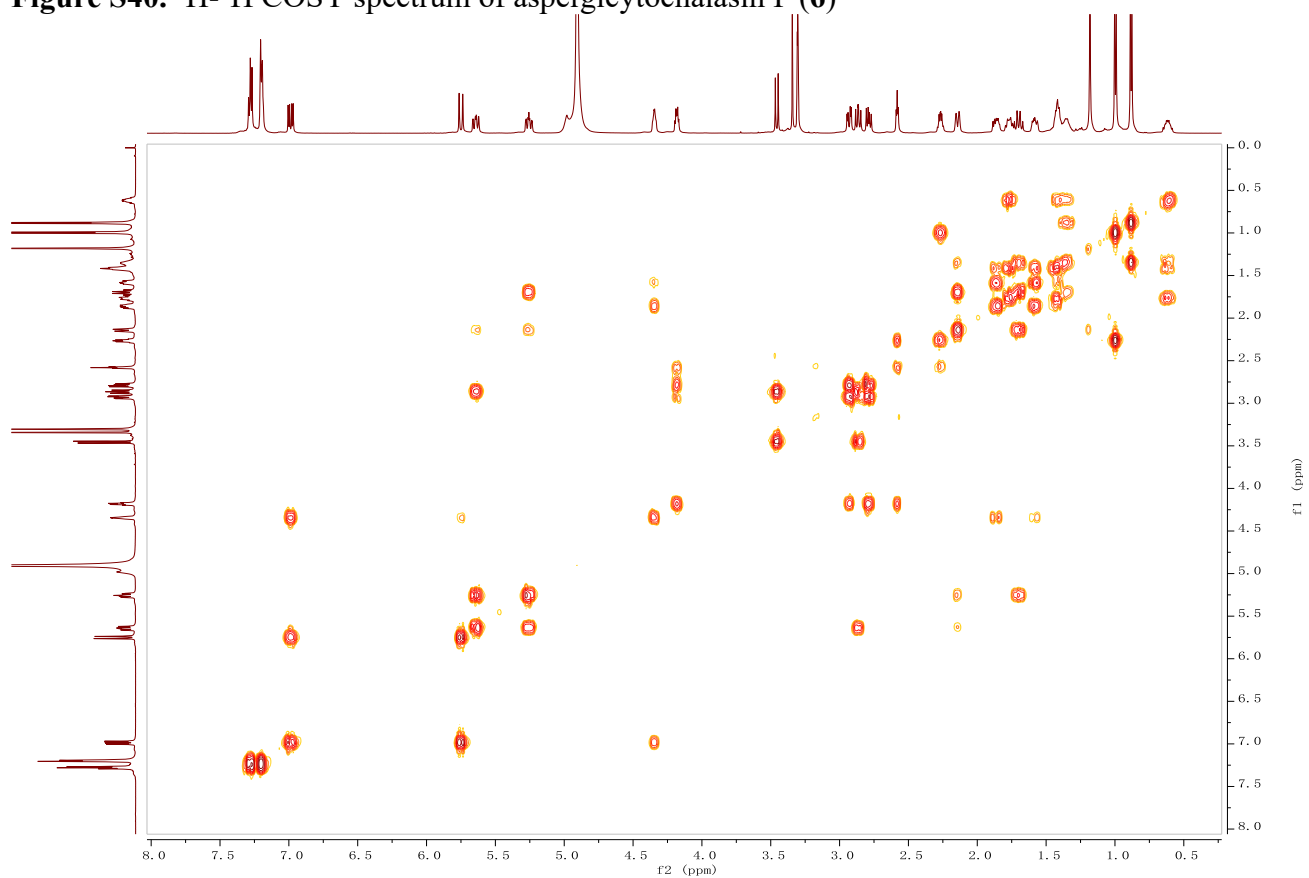

**Figure S41.** ROESY spectrum of aspergicytochalasin F (**6**)

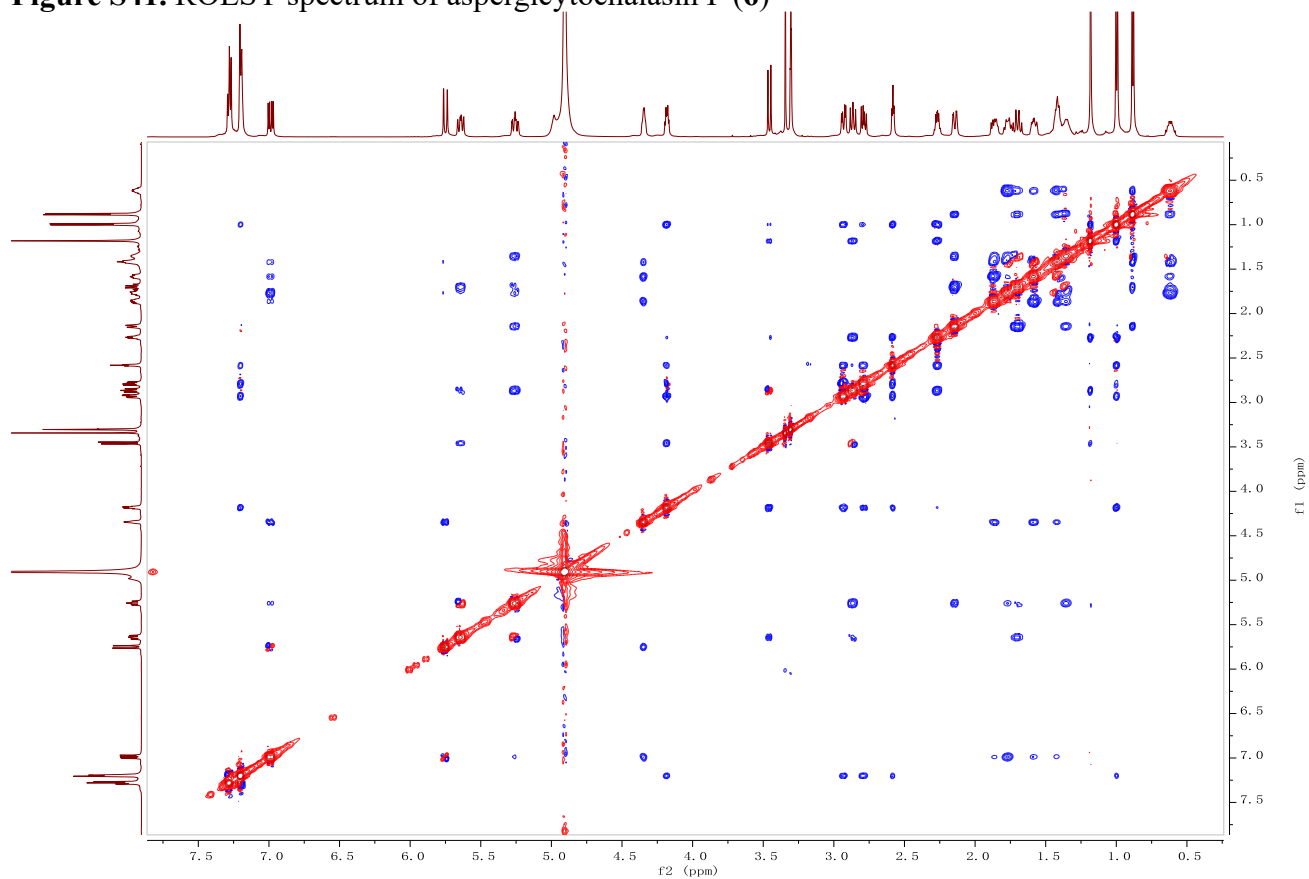

**Figure S42.** HRESIMS of aspergicytochalasin F (**6**)

T: FTMS + p ESI Full lock ms [150.0000-1100.0000]

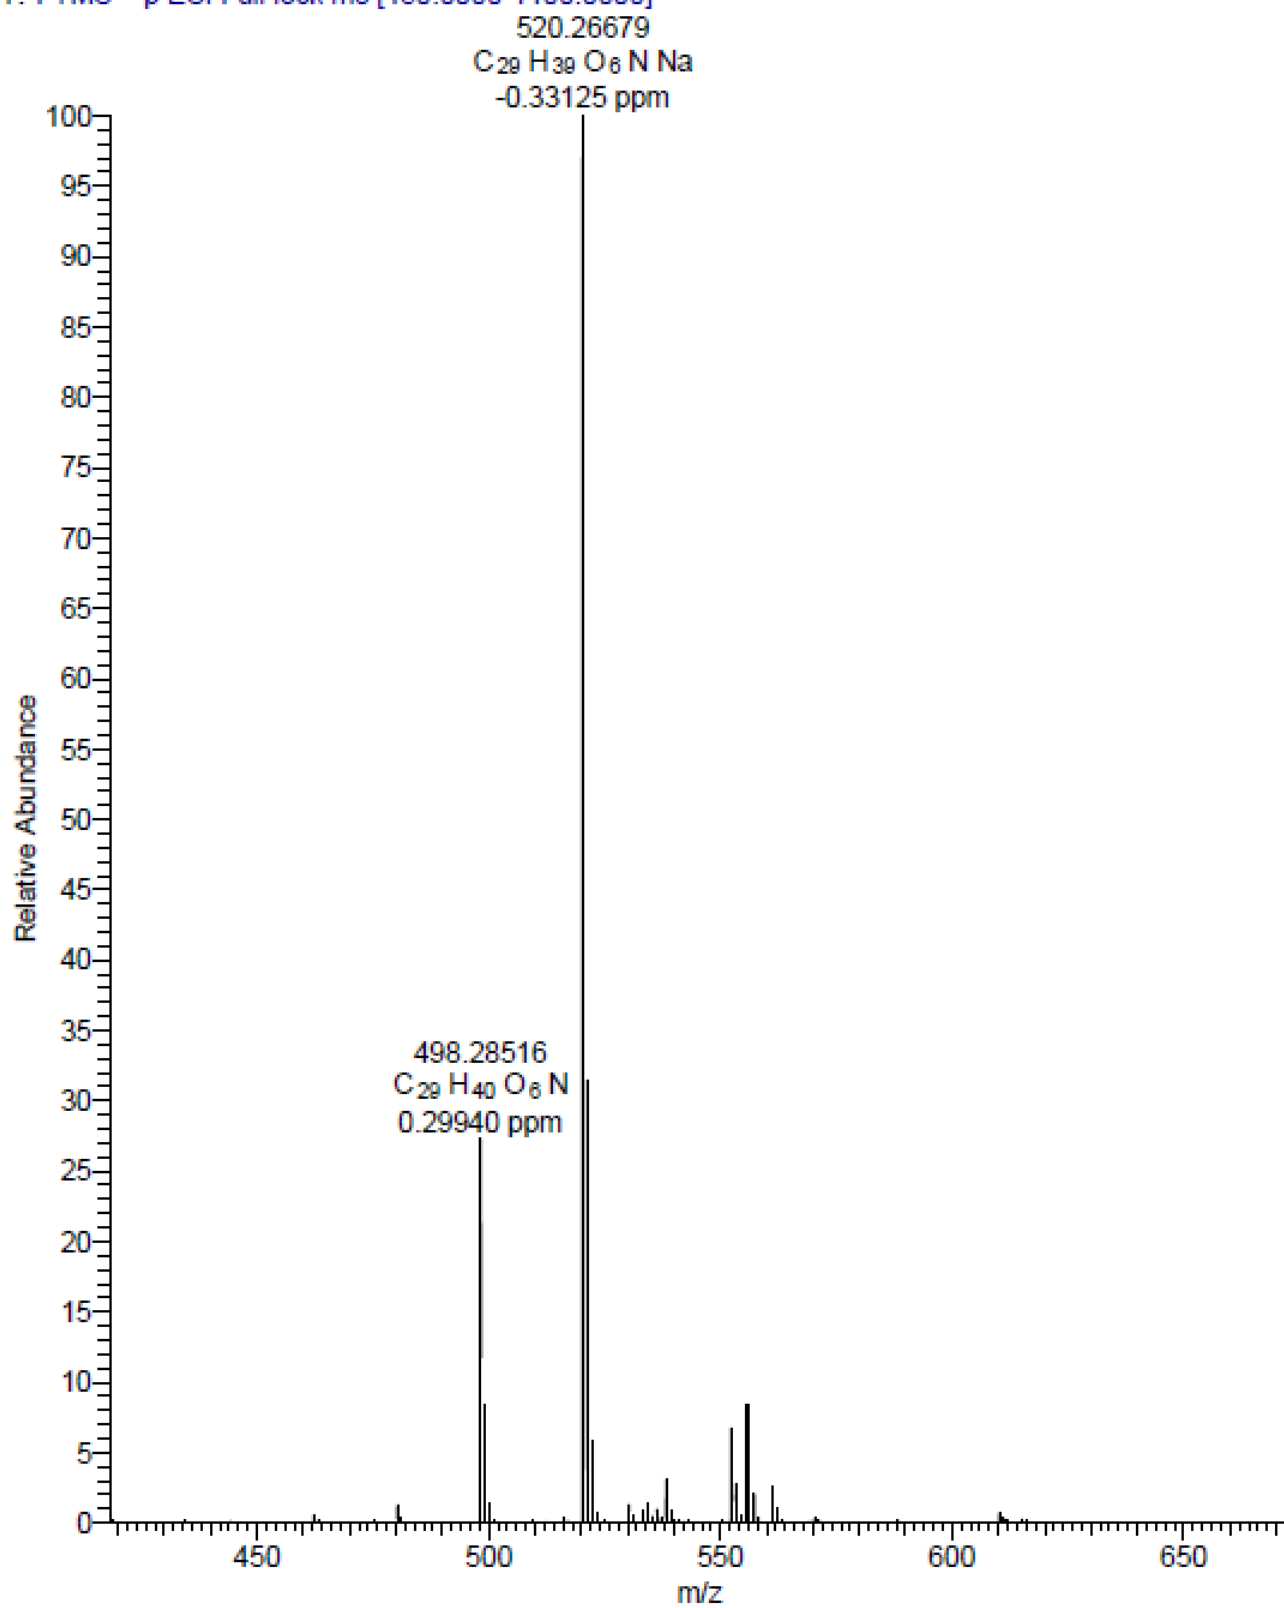

## Section S2. X-Ray Crystallographic Data for aspergicytochalasin A (1).

Crystal data for **cu\_1\_0m**: A light colorless PRISM-like of  $C_{29}H_{37}NO_5 \cdot H_2O$ ,  $M = 497.61$ , approximate dimensions 0.128 mm x 0.131 mm x 0.262 mm, was used for the X-ray crystallographic analysis on the BRUKER D8 QUEST. The integration of the data using a monoclinic unit cell yielded a total of 33558 reflections to a maximum  $\theta$  angle of  $79.22^\circ$  (0.78 Å resolution), of which 5713 were independent (average redundancy 5.874, completeness = 99.7%,  $R_{int} = 5.23\%$ ,  $R_{sig} = 3.83\%$ ) and 5592 (97.88%) were greater than  $2\sigma(F^2)$ . The final cell constants of  $a = 9.8035(6)$  Å,  $b = 12.4869(8)$  Å,  $c = 11.0745(7)$  Å,  $\alpha = 90.00^\circ$ ,  $\beta = 98.951(2)^\circ$ ,  $\gamma = 90.00^\circ$ ,  $V = 1339.18(15)$  Å<sup>3</sup>,  $T = 150.(2)$  K. Data were corrected for absorption effects using the Multi-Scan method (SADABS). The structure was solved and refined using the Bruker SHELXTL Software Package, using the space group  $P 1 2_1 1$ , with  $Z = 2$ ,  $\mu(\text{CuK}\alpha) = 1.54178$ . The final anisotropic full-matrix least-squares refinement on  $F^2$  with 344 variables converged at  $R1 = 3.24\%$ , for the observed data and  $wR2 = 7.65\%$  for all data. The goodness-of-fit was 1.054. The absolute configuration was determined by the Flack parameter = 0.08(4), which was determined using 2534 quotients  $[(I^+)-(I^-)]/[(I^+)+(I^-)]$  (Parsons, Flack and Wagner, Acta Cryst. B69 (2013) 249-259).

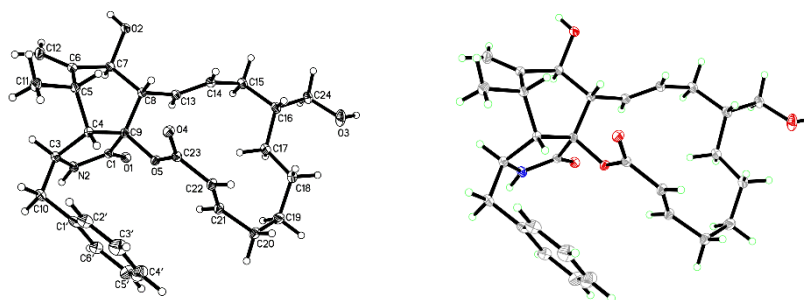

Supplement: Supplementary file 1 [file jof-09-00374-s001.zip › Supporting Information.pdf]
