# Supplementary material for: Cytochalasans from the Endophytic Fungus Aspergillus sp. LE2: Their Structures, Antibacterial and NO Production Inhibitory Activities
Source: J Fungi (Basel). 2023 Mar 19;9(3):374. doi: 10.3390/jof9030374 (PMC10051723; doi:10.3390/jof9030374)
Supplement: Supplementary file 1 [file jof-09-00374-s001.zip › compound 1 cif.cif]

data_global
_audit_creation_method                  'APEX3 v2017.3-0'

_publ_requested_journal                 ?

_publ_contact_author_name               ?
_publ_contact_author_address            
;
;
_publ_contact_author_email              ?
_publ_contact_author_fax                ?
_publ_contact_author_phone              ?

_publ_section_title                     
;
;
_publ_section_abstract                  
;
;
_publ_section_references                
;
;
_publ_section_comment                   
;
;

data_lcyl81
_chemical_name_systematic               ?
_chemical_name_common                   ?
_chemical_formula_moiety                ?
_chemical_formula_sum                   'C29 H39 N O6'
_chemical_formula_iupac                 ?
_chemical_formula_weight                497.61
_chemical_absolute_configuration        ad

_chemical_melting_point                 ?

_space_group_crystal_system             monoclinic
_space_group_name_H-M_alt               'P 1 21 1'
_space_group_name_Hall                  'P 2yb'
loop_
    _space_group_symop_operation_xyz
    'x, y, z'
    '-x, y+1/2, -z'

_cell_length_a                          9.8035(6)
_cell_length_b                          12.4869(8)
_cell_length_c                          11.0745(7)
_cell_angle_alpha                       90
_cell_angle_beta                        98.951(2)
_cell_angle_gamma                       90
_cell_volume                            1339.18(15)
_cell_formula_units_Z                   2
_cell_measurement_reflns_used           9919
_cell_measurement_theta_min             4.0410
_cell_measurement_theta_max             78.9040
_cell_measurement_temperature           150.(2)

_exptl_crystal_description              PRISM
_exptl_crystal_colour                   'light colourless'
_exptl_crystal_size_max                 0.262
_exptl_crystal_size_mid                 0.131
_exptl_crystal_size_min                 0.128
_exptl_crystal_density_diffrn           1.234
_exptl_crystal_density_meas             ?
_exptl_crystal_density_method           'not measured'
_exptl_crystal_F_000                    536

_exptl_absorpt_coefficient_mu           0.691
_exptl_absorpt_correction_type          Multi-Scan
_exptl_absorpt_process_details          
;
SADABS-2016/2 - Bruker AXS area detector scaling and absorption correction
;
_exptl_absorpt_correction_T_min         0.83
_exptl_absorpt_correction_T_max         0.92

_exptl_special_details                  
;
; 

_diffrn_ambient_temperature             150.(2)

_diffrn_source                          ?
_diffrn_source_type                     ?

_diffrn_radiation_type                   'Cu K\a'
_diffrn_radiation_wavelength            1.54178
_diffrn_radiation_monochromator         ?

_diffrn_measurement_device_type         'Bruker APEX-II CCD'
_diffrn_measurement_method              '\f and \w scans' 

_diffrn_detector_area_resol_mean        7.3910

_diffrn_reflns_number                   33558
_diffrn_reflns_av_R_equivalents         0.0523
_diffrn_reflns_av_unetI/netI            0.0383
_diffrn_reflns_theta_min                4.04
_diffrn_reflns_theta_max                79.22
_diffrn_reflns_theta_full               79.22
_diffrn_measured_fraction_theta_max     0.997
_diffrn_measured_fraction_theta_full    0.997
_diffrn_reflns_limit_h_min              -12
_diffrn_reflns_limit_h_max              9
_diffrn_reflns_limit_k_min              -15
_diffrn_reflns_limit_k_max              15
_diffrn_reflns_limit_l_min              -13
_diffrn_reflns_limit_l_max              14

_refine_special_details                 
;
;

_reflns_number_total                    5713
_reflns_number_gt                       5592
_reflns_threshold_expression            'I > 2\s(I)'

_refine_ls_structure_factor_coef        Fsqd
_refine_ls_matrix_type                  full
_refine_ls_R_factor_all                 0.0332
_refine_ls_R_factor_gt                  0.0324
_refine_ls_wR_factor_gt                 0.0757
_refine_ls_wR_factor_ref                0.0765
_refine_ls_goodness_of_fit_ref          1.054
_refine_ls_restrained_S_all             1.054
_refine_ls_number_reflns                5713
_refine_ls_number_parameters            344
_refine_ls_number_restraints            1
_refine_ls_number_constraints           ?
_refine_ls_hydrogen_treatment           mixed
_refine_ls_weighting_scheme             calc
_refine_ls_weighting_details            
    'w=1/[\s^2^(Fo^2^)+(0.0334P)^2^+0.2247P] where P=(Fo^2^+2Fc^2^)/3'

_atom_sites_solution_hydrogens          mixed
_atom_sites_solution_primary            ?
_atom_sites_solution_secondary          ?

_refine_ls_shift/su_max                 0.000
_refine_ls_shift/su_mean                0.000
_refine_diff_density_max                0.203
_refine_diff_density_min                -0.199
_refine_ls_extinction_method            none
_refine_ls_extinction_coef              ?
_refine_ls_abs_structure_details        
;

Flack x determined using 2534 quotients [(I+)-(I-)]/[(I+)+(I-)]
(Parsons, Flack and Wagner, Acta Cryst. B69 (2013) 249-259).
;
_refine_ls_abs_structure_Flack          0.08(4)

loop_
    _atom_type_symbol
    _atom_type_description
    _atom_type_scat_dispersion_real
    _atom_type_scat_dispersion_imag
    _atom_type_scat_source
    C C 0.0181 0.0091 'International Tables Vol C Tables 4.2.6.8 and 6.1.1.4'
    H H 0.0000 0.0000 'International Tables Vol C Tables 4.2.6.8 and 6.1.1.4'
    N N 0.0311 0.0180 'International Tables Vol C Tables 4.2.6.8 and 6.1.1.4'
    O O 0.0492 0.0322 'International Tables Vol C Tables 4.2.6.8 and 6.1.1.4'

_computing_data_collection              ?
_computing_cell_refinement              'SAINT V8.38A (Bruker AXS Inc., 2017)'
_computing_data_reduction               'SAINT V8.38A (Bruker AXS Inc., 2017)'
_computing_structure_solution           'SHELXT 2014/5 (Sheldrick, 2014)'
_computing_structure_refinement         'SHELXL-2016/6 (Sheldrick, 2016)'
_computing_molecular_graphics           'shelXle (C.B. Huebschle, rev 833)'
_computing_publication_material         ?

loop_
    _atom_site_type_symbol
    _atom_site_label
    _atom_site_fract_x
    _atom_site_fract_y
    _atom_site_fract_z
    _atom_site_U_iso_or_equiv
    _atom_site_adp_type
    _atom_site_calc_flag
    _atom_site_refinement_flags_adp
    _atom_site_refinement_flags_occupancy
    _atom_site_refinement_flags_posn
    _atom_site_occupancy
    _atom_site_disorder_assembly
    _atom_site_disorder_group
    O O5 0.20566(12) 0.59044(9) 0.42699(11) 0.0179(2) Uani d . . . 1 . .
    C C5' 0.0861(2) 0.84884(19) 0.2404(2) 0.0376(5) Uani d . . . 1 . .
    H H5' 0.057376 0.901205 0.293405 0.045 Uiso calc U . R 1 . .
    C C5 0.17434(17) 0.35036(14) 0.22749(16) 0.0201(3) Uani d . . . 1 . .
    H H5 0.274766 0.344498 0.261286 0.024 Uiso calc U . R 1 . .
    O O1 -0.04650(12) 0.52979(11) 0.50838(11) 0.0222(3) Uani d . . . 1 . .
    H H2O 0.179(4) 0.153(3) 0.485(3) 0.045(8) Uiso d . . . 1 . .
    H H1N -0.177(3) 0.542(3) 0.290(3) 0.040(7) Uiso d . . . 1 . .
    H H1W 0.324(3) 0.174(2) 0.665(3) 0.028(6) Uiso d . . . 1 . .
    C C1' 0.04660(19) 0.67976(15) 0.13350(16) 0.0242(4) Uani d . . . 1 . .
    C C1 -0.00914(16) 0.51313(13) 0.40908(15) 0.0175(3) Uani d . . . 1 . .
    O O2 0.21883(14) 0.20893(11) 0.49604(12) 0.0246(3) Uani d . . . 1 . .
    C C2' 0.1700(2) 0.69516(18) 0.0878(2) 0.0323(4) Uani d . . . 1 . .
    H H2' 0.199605 0.642648 0.03549 0.039 Uiso calc U . R 1 . .
    N N2 -0.08743(14) 0.51813(12) 0.29944(14) 0.0199(3) Uani d . . . 1 . .
    C C3' 0.2505(2) 0.7860(2) 0.1174(3) 0.0438(6) Uani d . . . 1 . .
    H H3' 0.334244 0.795105 0.085501 0.053 Uiso calc U . R 1 . .
    H H2W 0.429(4) 0.107(3) 0.691(3) 0.051(9) Uiso d . . . 1 . .
    O O3 0.59424(19) 0.64104(16) 1.02367(15) 0.0439(4) Uani d . . . 1 . .
    H H3A 0.607(4) 0.6451(19) 1.108(4) 0.066 Uiso calc U . R 1 . .
    C C6' 0.0057(2) 0.75826(17) 0.2099(2) 0.0294(4) Uani d . . . 1 . .
    H H6' -0.078353 0.749721 0.241553 0.035 Uiso calc U . R 1 . .
    C C3 -0.02123(16) 0.49081(14) 0.19479(16) 0.0197(3) Uani d . . . 1 . .
    H H3 -0.064418 0.423945 0.156546 0.024 Uiso calc U . R 1 . .
    C C12 0.0082(2) 0.20188(18) 0.2561(2) 0.0332(4) Uani d . . . 1 . .
    H H12A -0.013768 0.192498 0.170154 0.04 Uiso calc U . R 1 . .
    H H12B -0.034831 0.158216 0.30953 0.04 Uiso calc U . R 1 . .
    C C4 0.13044(16) 0.46612(13) 0.25151(15) 0.0173(3) Uani d . . . 1 . .
    H H4 0.192808 0.516808 0.216352 0.021 Uiso calc U . R 1 . .
    C C4' 0.2083(3) 0.8629(2) 0.1935(3) 0.0455(6) Uani d . . . 1 . .
    H H4' 0.262756 0.925253 0.213597 0.055 Uiso calc U . R 1 . .
    O O4 0.40313(12) 0.55089(11) 0.35526(12) 0.0227(3) Uani d . . . 1 . .
    C C6 0.09894(18) 0.27602(15) 0.30160(16) 0.0217(3) Uani d . . . 1 . .
    C C9 0.14074(16) 0.48861(13) 0.39031(15) 0.0166(3) Uani d . . . 1 . .
    C C10 -0.03782(18) 0.58072(16) 0.09801(16) 0.0243(4) Uani d . . . 1 . .
    H H10A -0.011925 0.551951 0.021415 0.029 Uiso calc U . R 1 . .
    H H10B -0.136449 0.60131 0.080693 0.029 Uiso calc U . R 1 . .
    C C11 0.1601(2) 0.32581(17) 0.09100(17) 0.0286(4) Uani d . . . 1 . .
    H H11A 0.06245 0.328814 0.054528 0.043 Uiso calc U . R 1 . .
    H H11B 0.196472 0.254057 0.079474 0.043 Uiso calc U . R 1 . .
    H H11C 0.212181 0.37879 0.051417 0.043 Uiso calc U . R 1 . .
    C C15 0.3781(2) 0.45037(16) 0.81145(17) 0.0270(4) Uani d . . . 1 . .
    H H15A 0.426994 0.388656 0.854562 0.032 Uiso calc U . R 1 . .
    H H15B 0.287443 0.457006 0.839547 0.032 Uiso calc U . R 1 . .
    C C19 0.3722(2) 0.85128(17) 0.7433(2) 0.0319(4) Uani d . . . 1 . .
    H H19A 0.408761 0.917169 0.786407 0.038 Uiso calc U . R 1 . .
    H H19B 0.276747 0.84074 0.759771 0.038 Uiso calc U . R 1 . .
    C C8 0.21131(17) 0.39798(13) 0.47154(16) 0.0175(3) Uani d . . . 1 . .
    H H8 0.305262 0.38809 0.448702 0.021 Uiso calc U . R 1 . .
    C C18 0.4608(2) 0.75571(17) 0.7961(2) 0.0331(4) Uani d . . . 1 . .
    H H18A 0.53255 0.742022 0.74422 0.04 Uiso calc U . R 1 . .
    H H18B 0.508359 0.7747 0.878868 0.04 Uiso calc U . R 1 . .
    C C13 0.23167(18) 0.42290(14) 0.60622(16) 0.0204(3) Uani d . . . 1 . .
    H H13 0.152071 0.435551 0.64332 0.024 Uiso calc U . R 1 . .
    C C14 0.35488(19) 0.42821(15) 0.67628(17) 0.0235(3) Uani d . . . 1 . .
    H H14 0.434015 0.417183 0.63803 0.028 Uiso calc U . R 1 . .
    C C16 0.46290(18) 0.55332(16) 0.84689(16) 0.0238(4) Uani d . . . 1 . .
    H H16 0.545849 0.55214 0.80455 0.029 Uiso calc U . R 1 . .
    C C24 0.5125(2) 0.55028(18) 0.98493(18) 0.0304(4) Uani d . . . 1 . .
    H H24A 0.431653 0.548147 1.02843 0.036 Uiso calc U . R 1 . .
    H H24B 0.567347 0.484451 1.006005 0.036 Uiso calc U . R 1 . .
    C C7 0.13185(16) 0.29318(14) 0.43958(16) 0.0194(3) Uani d . . . 1 . .
    H H7 0.043951 0.294564 0.474828 0.023 Uiso calc U . R 1 . .
    C C17 0.37775(19) 0.65296(16) 0.80449(17) 0.0244(4) Uani d . . . 1 . .
    H H17A 0.323804 0.638107 0.722999 0.029 Uiso calc U . R 1 . .
    H H17B 0.311107 0.665556 0.861598 0.029 Uiso calc U . R 1 . .
    C C21 0.31419(18) 0.77158(15) 0.53358(17) 0.0223(3) Uani d . . . 1 . .
    H H21 0.220048 0.753009 0.532601 0.027 Uiso calc U . R 1 . .
    C C20 0.3679(2) 0.86772(16) 0.60498(18) 0.0263(4) Uani d . . . 1 . .
    H H20A 0.308401 0.929965 0.577938 0.032 Uiso calc U . R 1 . .
    H H20B 0.462169 0.883842 0.588449 0.032 Uiso calc U . R 1 . .
    O O1W 0.35476(13) 0.13157(12) 0.71932(12) 0.0237(3) Uani d . . . 1 . .
    C C23 0.33624(17) 0.61025(14) 0.41095(16) 0.0191(3) Uani d . . . 1 . .
    C C22 0.38902(18) 0.70986(15) 0.47101(17) 0.0223(3) Uani d . . . 1 . .
    H H22 0.480704 0.731272 0.464987 0.027 Uiso calc U . R 1 . .

loop_
    _atom_site_aniso_label
    _atom_site_aniso_U_11
    _atom_site_aniso_U_22
    _atom_site_aniso_U_33
    _atom_site_aniso_U_12
    _atom_site_aniso_U_13
    _atom_site_aniso_U_23
    O5 0.0165(5) 0.0161(5) 0.0213(6) -0.0023(4) 0.0033(4) -0.0022(4)
    C5' 0.0396(11) 0.0302(10) 0.0446(13) -0.0025(9) 0.0113(9) -0.0017(9)
    C5 0.0193(7) 0.0214(8) 0.0190(8) 0.0029(6) 0.0012(6) -0.0028(6)
    O1 0.0216(5) 0.0257(6) 0.0201(6) 0.0030(5) 0.0056(4) -0.0009(5)
    C1' 0.0238(8) 0.0281(10) 0.0209(8) 0.0045(7) 0.0036(6) 0.0089(7)
    C1 0.0163(7) 0.0158(7) 0.0203(7) -0.0004(6) 0.0021(6) 0.0006(6)
    O2 0.0263(6) 0.0170(6) 0.0275(7) -0.0017(5) -0.0057(5) 0.0041(5)
    C2' 0.0294(9) 0.0350(11) 0.0346(10) 0.0038(8) 0.0116(8) 0.0086(9)
    N2 0.0152(6) 0.0240(7) 0.0203(7) 0.0011(5) 0.0022(5) 0.0006(6)
    C3' 0.0340(11) 0.0451(14) 0.0559(14) -0.0050(10) 0.0180(10) 0.0108(11)
    O3 0.0488(9) 0.0550(11) 0.0237(7) -0.0180(8) -0.0071(6) -0.0007(7)
    C6' 0.0280(9) 0.0297(10) 0.0317(10) 0.0022(8) 0.0083(7) 0.0041(8)
    C3 0.0175(7) 0.0228(8) 0.0186(7) 0.0006(6) 0.0019(6) 0.0001(6)
    C12 0.0410(11) 0.0265(10) 0.0280(9) -0.0098(8) -0.0074(8) 0.0013(8)
    C4 0.0161(7) 0.0192(8) 0.0165(7) -0.0009(6) 0.0020(5) -0.0003(6)
    C4' 0.0396(12) 0.0370(12) 0.0610(16) -0.0129(10) 0.0108(11) 0.0036(12)
    O4 0.0188(5) 0.0218(6) 0.0283(6) -0.0006(5) 0.0059(4) -0.0041(5)
    C6 0.0222(7) 0.0187(8) 0.0225(8) 0.0014(6) -0.0016(6) 0.0004(7)
    C9 0.0156(7) 0.0165(7) 0.0174(7) -0.0013(6) 0.0018(5) -0.0012(6)
    C10 0.0232(8) 0.0296(9) 0.0190(8) 0.0031(7) -0.0003(6) 0.0043(7)
    C11 0.0328(9) 0.0318(10) 0.0211(9) 0.0026(7) 0.0039(7) -0.0067(7)
    C15 0.0313(9) 0.0273(9) 0.0199(9) 0.0015(7) -0.0034(7) 0.0022(7)
    C19 0.0414(11) 0.0243(9) 0.0292(10) 0.0019(8) 0.0027(8) -0.0051(8)
    C8 0.0164(7) 0.0178(8) 0.0179(7) 0.0000(6) 0.0014(5) 0.0001(6)
    C18 0.0287(9) 0.0291(10) 0.0380(11) -0.0032(8) -0.0062(8) -0.0021(9)
    C13 0.0220(8) 0.0208(8) 0.0179(8) 0.0004(6) 0.0018(6) 0.0011(6)
    C14 0.0250(8) 0.0230(9) 0.0211(8) 0.0023(7) -0.0010(6) -0.0014(7)
    C16 0.0223(8) 0.0287(9) 0.0190(8) 0.0028(7) -0.0008(6) -0.0004(7)
    C24 0.0331(9) 0.0334(10) 0.0216(9) 0.0010(8) -0.0052(7) -0.0015(8)
    C7 0.0179(7) 0.0178(8) 0.0215(8) -0.0006(6) -0.0001(6) 0.0023(6)
    C17 0.0222(8) 0.0291(9) 0.0214(8) 0.0026(7) 0.0018(6) 0.0002(7)
    C21 0.0199(7) 0.0223(8) 0.0247(8) -0.0029(6) 0.0028(6) -0.0019(7)
    C20 0.0272(8) 0.0224(9) 0.0292(9) -0.0021(7) 0.0040(7) -0.0060(7)
    O1W 0.0195(6) 0.0296(7) 0.0218(6) 0.0016(5) 0.0027(5) 0.0042(6)
    C23 0.0180(7) 0.0196(8) 0.0195(8) -0.0005(6) 0.0028(6) 0.0011(6)
    C22 0.0189(7) 0.0221(8) 0.0259(8) -0.0050(6) 0.0034(6) -0.0028(7)

_geom_special_details                   
;

All esds (except the esd in the dihedral angle between two l.s. planes)
are estimated using the full covariance matrix.  The cell esds are taken
into account individually in the estimation of esds in distances, angles
and torsion angles; correlations between esds in cell parameters are only
used when they are defined by crystal symmetry.  An approximate (isotropic)
treatment of cell esds is used for estimating esds involving l.s. planes.
;

loop_
    _geom_bond_atom_site_label_1
    _geom_bond_atom_site_label_2
    _geom_bond_site_symmetry_2
    _geom_bond_distance
    _geom_bond_publ_flag
    O5 C23 . 1.343(2) ?
    O5 C9 . 1.4513(19) ?
    C5' C4' . 1.390(4) ?
    C5' C6' . 1.390(3) ?
    C5' H5' . 0.95 ?
    C5 C6 . 1.507(2) ?
    C5 C11 . 1.527(2) ?
    C5 C4 . 1.543(2) ?
    C5 H5 . 1.0 ?
    O1 C1 . 1.230(2) ?
    C1' C6' . 1.394(3) ?
    C1' C2' . 1.395(3) ?
    C1' C10 . 1.506(3) ?
    C1 N2 . 1.333(2) ?
    C1 C9 . 1.546(2) ?
    O2 C7 . 1.435(2) ?
    O2 H2O . 0.80(4) ?
    C2' C3' . 1.392(4) ?
    C2' H2' . 0.95 ?
    N2 C3 . 1.454(2) ?
    N2 H1N . 0.91(3) ?
    C3' C4' . 1.383(4) ?
    C3' H3' . 0.95 ?
    O3 C24 . 1.415(3) ?
    O3 H3A . 0.92(4) ?
    C6' H6' . 0.95 ?
    C3 C10 . 1.543(2) ?
    C3 C4 . 1.552(2) ?
    C3 H3 . 1.0 ?
    C12 C6 . 1.328(3) ?
    C12 H12A . 0.95 ?
    C12 H12B . 0.95 ?
    C4 C9 . 1.550(2) ?
    C4 H4 . 1.0 ?
    C4' H4' . 0.95 ?
    O4 C23 . 1.219(2) ?
    C6 C7 . 1.527(2) ?
    C9 C8 . 1.541(2) ?
    C10 H10A . 0.99 ?
    C10 H10B . 0.99 ?
    C11 H11A . 0.98 ?
    C11 H11B . 0.98 ?
    C11 H11C . 0.98 ?
    C15 C14 . 1.504(3) ?
    C15 C16 . 1.548(3) ?
    C15 H15A . 0.99 ?
    C15 H15B . 0.99 ?
    C19 C18 . 1.537(3) ?
    C19 C20 . 1.539(3) ?
    C19 H19A . 0.99 ?
    C19 H19B . 0.99 ?
    C8 C13 . 1.506(2) ?
    C8 C7 . 1.536(2) ?
    C8 H8 . 1.0 ?
    C18 C17 . 1.530(3) ?
    C18 H18A . 0.99 ?
    C18 H18B . 0.99 ?
    C13 C14 . 1.332(3) ?
    C13 H13 . 0.95 ?
    C14 H14 . 0.95 ?
    C16 C17 . 1.531(3) ?
    C16 C24 . 1.531(3) ?
    C16 H16 . 1.0 ?
    C24 H24A . 0.99 ?
    C24 H24B . 0.99 ?
    C7 H7 . 1.0 ?
    C17 H17A . 0.99 ?
    C17 H17B . 0.99 ?
    C21 C22 . 1.331(3) ?
    C21 C20 . 1.488(3) ?
    C21 H21 . 0.95 ?
    C20 H20A . 0.99 ?
    C20 H20B . 0.99 ?
    O1W H1W . 0.82(3) ?
    O1W H2W . 0.88(4) ?
    C23 C22 . 1.466(2) ?
    C22 H22 . 0.95 ?

loop_
    _geom_angle_atom_site_label_1
    _geom_angle_atom_site_label_2
    _geom_angle_atom_site_label_3
    _geom_angle_site_symmetry_1
    _geom_angle_site_symmetry_3
    _geom_angle
    _geom_angle_publ_flag
    C23 O5 C9 . . 120.67(13) ?
    C4' C5' C6' . . 120.1(2) ?
    C4' C5' H5' . . 119.9 ?
    C6' C5' H5' . . 119.9 ?
    C6 C5 C11 . . 115.99(16) ?
    C6 C5 C4 . . 108.03(14) ?
    C11 C5 C4 . . 111.94(15) ?
    C6 C5 H5 . . 106.8 ?
    C11 C5 H5 . . 106.8 ?
    C4 C5 H5 . . 106.8 ?
    C6' C1' C2' . . 118.09(19) ?
    C6' C1' C10 . . 122.51(16) ?
    C2' C1' C10 . . 119.40(18) ?
    O1 C1 N2 . . 126.67(15) ?
    O1 C1 C9 . . 125.12(15) ?
    N2 C1 C9 . . 108.14(14) ?
    C7 O2 H2O . . 110.(2) ?
    C3' C2' C1' . . 121.3(2) ?
    C3' C2' H2' . . 119.4 ?
    C1' C2' H2' . . 119.4 ?
    C1 N2 C3 . . 116.73(13) ?
    C1 N2 H1N . . 122.(2) ?
    C3 N2 H1N . . 121.(2) ?
    C4' C3' C2' . . 119.8(2) ?
    C4' C3' H3' . . 120.1 ?
    C2' C3' H3' . . 120.1 ?
    C24 O3 H3A . . 109.5 ?
    C5' C6' C1' . . 120.92(19) ?
    C5' C6' H6' . . 119.5 ?
    C1' C6' H6' . . 119.5 ?
    N2 C3 C10 . . 111.77(14) ?
    N2 C3 C4 . . 104.02(13) ?
    C10 C3 C4 . . 114.60(14) ?
    N2 C3 H3 . . 108.7 ?
    C10 C3 H3 . . 108.7 ?
    C4 C3 H3 . . 108.7 ?
    C6 C12 H12A . . 120.0 ?
    C6 C12 H12B . . 120.0 ?
    H12A C12 H12B . . 120.0 ?
    C5 C4 C9 . . 111.33(13) ?
    C5 C4 C3 . . 113.05(13) ?
    C9 C4 C3 . . 106.00(13) ?
    C5 C4 H4 . . 108.8 ?
    C9 C4 H4 . . 108.8 ?
    C3 C4 H4 . . 108.8 ?
    C3' C4' C5' . . 119.8(2) ?
    C3' C4' H4' . . 120.1 ?
    C5' C4' H4' . . 120.1 ?
    C12 C6 C5 . . 125.41(17) ?
    C12 C6 C7 . . 120.15(17) ?
    C5 C6 C7 . . 114.42(15) ?
    O5 C9 C8 . . 110.03(13) ?
    O5 C9 C1 . . 99.98(12) ?
    C8 C9 C1 . . 114.62(13) ?
    O5 C9 C4 . . 113.22(13) ?
    C8 C9 C4 . . 113.56(13) ?
    C1 C9 C4 . . 104.63(13) ?
    C1' C10 C3 . . 114.96(15) ?
    C1' C10 H10A . . 108.5 ?
    C3 C10 H10A . . 108.5 ?
    C1' C10 H10B . . 108.5 ?
    C3 C10 H10B . . 108.5 ?
    H10A C10 H10B . . 107.5 ?
    C5 C11 H11A . . 109.5 ?
    C5 C11 H11B . . 109.5 ?
    H11A C11 H11B . . 109.5 ?
    C5 C11 H11C . . 109.5 ?
    H11A C11 H11C . . 109.5 ?
    H11B C11 H11C . . 109.5 ?
    C14 C15 C16 . . 113.41(16) ?
    C14 C15 H15A . . 108.9 ?
    C16 C15 H15A . . 108.9 ?
    C14 C15 H15B . . 108.9 ?
    C16 C15 H15B . . 108.9 ?
    H15A C15 H15B . . 107.7 ?
    C18 C19 C20 . . 114.13(18) ?
    C18 C19 H19A . . 108.7 ?
    C20 C19 H19A . . 108.7 ?
    C18 C19 H19B . . 108.7 ?
    C20 C19 H19B . . 108.7 ?
    H19A C19 H19B . . 107.6 ?
    C13 C8 C7 . . 112.86(14) ?
    C13 C8 C9 . . 113.87(14) ?
    C7 C8 C9 . . 109.00(13) ?
    C13 C8 H8 . . 106.9 ?
    C7 C8 H8 . . 106.9 ?
    C9 C8 H8 . . 106.9 ?
    C17 C18 C19 . . 113.55(17) ?
    C17 C18 H18A . . 108.9 ?
    C19 C18 H18A . . 108.9 ?
    C17 C18 H18B . . 108.9 ?
    C19 C18 H18B . . 108.9 ?
    H18A C18 H18B . . 107.7 ?
    C14 C13 C8 . . 123.75(16) ?
    C14 C13 H13 . . 118.1 ?
    C8 C13 H13 . . 118.1 ?
    C13 C14 C15 . . 124.89(17) ?
    C13 C14 H14 . . 117.6 ?
    C15 C14 H14 . . 117.6 ?
    C17 C16 C24 . . 113.56(16) ?
    C17 C16 C15 . . 110.59(15) ?
    C24 C16 C15 . . 107.89(16) ?
    C17 C16 H16 . . 108.2 ?
    C24 C16 H16 . . 108.2 ?
    C15 C16 H16 . . 108.2 ?
    O3 C24 C16 . . 111.09(17) ?
    O3 C24 H24A . . 109.4 ?
    C16 C24 H24A . . 109.4 ?
    O3 C24 H24B . . 109.4 ?
    C16 C24 H24B . . 109.4 ?
    H24A C24 H24B . . 108.0 ?
    O2 C7 C6 . . 110.61(14) ?
    O2 C7 C8 . . 106.18(13) ?
    C6 C7 C8 . . 111.77(14) ?
    O2 C7 H7 . . 109.4 ?
    C6 C7 H7 . . 109.4 ?
    C8 C7 H7 . . 109.4 ?
    C18 C17 C16 . . 115.48(15) ?
    C18 C17 H17A . . 108.4 ?
    C16 C17 H17A . . 108.4 ?
    C18 C17 H17B . . 108.4 ?
    C16 C17 H17B . . 108.4 ?
    H17A C17 H17B . . 107.5 ?
    C22 C21 C20 . . 124.45(16) ?
    C22 C21 H21 . . 117.8 ?
    C20 C21 H21 . . 117.8 ?
    C21 C20 C19 . . 111.94(17) ?
    C21 C20 H20A . . 109.2 ?
    C19 C20 H20A . . 109.2 ?
    C21 C20 H20B . . 109.2 ?
    C19 C20 H20B . . 109.2 ?
    H20A C20 H20B . . 107.9 ?
    H1W O1W H2W . . 101.(3) ?
    O4 C23 O5 . . 123.64(16) ?
    O4 C23 C22 . . 124.45(15) ?
    O5 C23 C22 . . 111.89(14) ?
    C21 C22 C23 . . 122.91(16) ?
    C21 C22 H22 . . 118.5 ?
    C23 C22 H22 . . 118.5 ?

loop_
    _geom_torsion_atom_site_label_1
    _geom_torsion_atom_site_label_2
    _geom_torsion_atom_site_label_3
    _geom_torsion_atom_site_label_4
    _geom_torsion_site_symmetry_1
    _geom_torsion_site_symmetry_2
    _geom_torsion_site_symmetry_3
    _geom_torsion_site_symmetry_4
    _geom_torsion
    _geom_torsion_publ_flag
    C6' C1' C2' C3' . . . . 0.1(3) ?
    C10 C1' C2' C3' . . . . 179.4(2) ?
    O1 C1 N2 C3 . . . . -177.59(17) ?
    C9 C1 N2 C3 . . . . 5.5(2) ?
    C1' C2' C3' C4' . . . . 0.0(4) ?
    C4' C5' C6' C1' . . . . 0.8(4) ?
    C2' C1' C6' C5' . . . . -0.5(3) ?
    C10 C1' C6' C5' . . . . -179.79(19) ?
    C1 N2 C3 C10 . . . . -125.65(16) ?
    C1 N2 C3 C4 . . . . -1.5(2) ?
    C6 C5 C4 C9 . . . . 49.16(17) ?
    C11 C5 C4 C9 . . . . 178.06(14) ?
    C6 C5 C4 C3 . . . . -70.04(17) ?
    C11 C5 C4 C3 . . . . 58.87(19) ?
    N2 C3 C4 C5 . . . . 119.04(15) ?
    C10 C3 C4 C5 . . . . -118.63(16) ?
    N2 C3 C4 C9 . . . . -3.19(17) ?
    C10 C3 C4 C9 . . . . 119.14(16) ?
    C2' C3' C4' C5' . . . . 0.3(4) ?
    C6' C5' C4' C3' . . . . -0.7(4) ?
    C11 C5 C6 C12 . . . . -9.7(3) ?
    C4 C5 C6 C12 . . . . 116.9(2) ?
    C11 C5 C6 C7 . . . . 171.74(15) ?
    C4 C5 C6 C7 . . . . -61.68(18) ?
    C23 O5 C9 C8 . . . . 67.22(18) ?
    C23 O5 C9 C1 . . . . -171.82(14) ?
    C23 O5 C9 C4 . . . . -61.05(18) ?
    O1 C1 C9 O5 . . . . -66.6(2) ?
    N2 C1 C9 O5 . . . . 110.33(14) ?
    O1 C1 C9 C8 . . . . 51.0(2) ?
    N2 C1 C9 C8 . . . . -132.08(15) ?
    O1 C1 C9 C4 . . . . 176.00(16) ?
    N2 C1 C9 C4 . . . . -7.04(17) ?
    C5 C4 C9 O5 . . . . 134.84(13) ?
    C3 C4 C9 O5 . . . . -101.84(14) ?
    C5 C4 C9 C8 . . . . 8.42(18) ?
    C3 C4 C9 C8 . . . . 131.74(14) ?
    C5 C4 C9 C1 . . . . -117.28(14) ?
    C3 C4 C9 C1 . . . . 6.03(17) ?
    C6' C1' C10 C3 . . . . -80.4(2) ?
    C2' C1' C10 C3 . . . . 100.3(2) ?
    N2 C3 C10 C1' . . . . 71.88(18) ?
    C4 C3 C10 C1' . . . . -46.1(2) ?
    O5 C9 C8 C13 . . . . 47.40(18) ?
    C1 C9 C8 C13 . . . . -64.31(19) ?
    C4 C9 C8 C13 . . . . 175.49(13) ?
    O5 C9 C8 C7 . . . . 174.40(12) ?
    C1 C9 C8 C7 . . . . 62.68(18) ?
    C4 C9 C8 C7 . . . . -57.52(17) ?
    C20 C19 C18 C17 . . . . -95.2(2) ?
    C7 C8 C13 C14 . . . . 116.54(19) ?
    C9 C8 C13 C14 . . . . -118.50(19) ?
    C8 C13 C14 C15 . . . . -178.49(17) ?
    C16 C15 C14 C13 . . . . -118.9(2) ?
    C14 C15 C16 C17 . . . . 70.5(2) ?
    C14 C15 C16 C24 . . . . -164.72(16) ?
    C17 C16 C24 O3 . . . . -58.6(2) ?
    C15 C16 C24 O3 . . . . 178.46(17) ?
    C12 C6 C7 O2 . . . . 75.3(2) ?
    C5 C6 C7 O2 . . . . -106.00(16) ?
    C12 C6 C7 C8 . . . . -166.59(18) ?
    C5 C6 C7 C8 . . . . 12.1(2) ?
    C13 C8 C7 O2 . . . . -65.53(17) ?
    C9 C8 C7 O2 . . . . 166.90(13) ?
    C13 C8 C7 C6 . . . . 173.78(14) ?
    C9 C8 C7 C6 . . . . 46.21(18) ?
    C19 C18 C17 C16 . . . . 175.28(17) ?
    C24 C16 C17 C18 . . . . 77.4(2) ?
    C15 C16 C17 C18 . . . . -161.12(17) ?
    C22 C21 C20 C19 . . . . -112.9(2) ?
    C18 C19 C20 C21 . . . . 58.3(2) ?
    C9 O5 C23 O4 . . . . 7.5(2) ?
    C9 O5 C23 C22 . . . . -171.04(14) ?
    C20 C21 C22 C23 . . . . 174.23(18) ?
    O4 C23 C22 C21 . . . . -178.36(19) ?
    O5 C23 C22 C21 . . . . 0.1(3) ?

_shelx_res_file                         
;

TITL LCYL81_0m_a.res in P2(1)
    LCYL81_0m.res
    created by SHELXL-2016/6 at 17:15:36 on 23-Jul-2019
CELL 1.54178 9.8035 12.4869 11.0745 90.000 98.951 90.000
ZERR 2 0.0006 0.0008 0.0007 0.000 0.002 0.000
LATT -1
SYMM -x, y+1/2, -z
SFAC C H N O
UNIT 58 78 2 12
LIST 6 ! automatically inserted. Change 6 to 4 for CHECKCIF!!
TEMP -123.140
SIZE 0.128 0.131 0.262
ACTA
L.S. 15
FMAP 2
PLAN -5 0 0.00
HTAB
BOND $H
CONF
WGHT    0.033400    0.224700
FVAR       1.37005
O5    4    0.205656    0.590439    0.426989    11.00000    0.01654    0.01614 =
         0.02125   -0.00216    0.00332   -0.00230
C5'   1    0.086055    0.848843    0.240400    11.00000    0.03960    0.03018 =
         0.04461   -0.00175    0.01127   -0.00248
AFIX  43
H5'   2    0.057376    0.901205    0.293405    11.00000   -1.20000
AFIX   0
C5    1    0.174344    0.350364    0.227492    11.00000    0.01932    0.02144 =
         0.01903   -0.00278    0.00121    0.00292
AFIX  13
H5    2    0.274766    0.344498    0.261286    11.00000   -1.20000
AFIX   0
O1    4   -0.046501    0.529787    0.508382    11.00000    0.02163    0.02572 =
         0.02013   -0.00085    0.00563    0.00303
H2O   2    0.178950    0.152728    0.485374    11.00000    0.04465
H1N   2   -0.176635    0.541611    0.289519    11.00000    0.04020
H1W   2    0.323576    0.174332    0.665255    11.00000    0.02838
C1'   1    0.046598    0.679756    0.133502    11.00000    0.02376    0.02812 =
         0.02085    0.00894    0.00360    0.00447
C1    1   -0.009136    0.513132    0.409084    11.00000    0.01633    0.01578 =
         0.02028    0.00061    0.00213   -0.00043
O2    4    0.218827    0.208929    0.496037    11.00000    0.02627    0.01704 =
         0.02745    0.00411   -0.00571   -0.00174
C2'   1    0.169990    0.695164    0.087818    11.00000    0.02945    0.03499 =
         0.03459    0.00859    0.01160    0.00382
AFIX  43
H2'   2    0.199605    0.642648    0.035490    11.00000   -1.20000
AFIX   0
N2    3   -0.087430    0.518135    0.299444    11.00000    0.01517    0.02398 =
         0.02035    0.00057    0.00217    0.00108
C3'   1    0.250500    0.785993    0.117446    11.00000    0.03405    0.04508 =
         0.05595    0.01083    0.01805   -0.00501
AFIX  43
H3'   2    0.334244    0.795105    0.085501    11.00000   -1.20000
AFIX   0
H2W   2    0.428542    0.107492    0.690990    11.00000    0.05107
O3    4    0.594238    0.641039    1.023668    11.00000    0.04879    0.05502 =
         0.02374   -0.00074   -0.00710   -0.01801
AFIX 148
H3A   2    0.607322    0.645083    1.107824    11.00000   -1.50000
AFIX   0
C6'   1    0.005662    0.758258    0.209898    11.00000    0.02800    0.02973 =
         0.03166    0.00410    0.00833    0.00222
AFIX  43
H6'   2   -0.078353    0.749721    0.241553    11.00000   -1.20000
AFIX   0
C3    1   -0.021227    0.490811    0.194790    11.00000    0.01750    0.02282 =
         0.01857    0.00009    0.00185    0.00059
AFIX  13
H3    2   -0.064418    0.423945    0.156546    11.00000   -1.20000
AFIX   0
C12   1    0.008169    0.201879    0.256114    11.00000    0.04104    0.02646 =
         0.02801    0.00129   -0.00742   -0.00983
AFIX  93
H12A  2   -0.013768    0.192498    0.170154    11.00000   -1.20000
H12B  2   -0.034831    0.158216    0.309530    11.00000   -1.20000
AFIX   0
C4    1    0.130442    0.466124    0.251507    11.00000    0.01608    0.01916 =
         0.01649   -0.00034    0.00202   -0.00086
AFIX  13
H4    2    0.192808    0.516808    0.216352    11.00000   -1.20000
AFIX   0
C4'   1    0.208335    0.862950    0.193486    11.00000    0.03958    0.03695 =
         0.06105    0.00362    0.01077   -0.01292
AFIX  43
H4'   2    0.262756    0.925253    0.213597    11.00000   -1.20000
AFIX   0
O4    4    0.403132    0.550891    0.355264    11.00000    0.01876    0.02176 =
         0.02835   -0.00412    0.00590   -0.00065
C6    1    0.098939    0.276024    0.301605    11.00000    0.02216    0.01875 =
         0.02251    0.00037   -0.00162    0.00138
C9    1    0.140736    0.488613    0.390307    11.00000    0.01557    0.01652 =
         0.01735   -0.00115    0.00175   -0.00127
C10   1   -0.037821    0.580716    0.098015    11.00000    0.02319    0.02961 =
         0.01898    0.00431   -0.00033    0.00315
AFIX  23
H10A  2   -0.011925    0.551951    0.021415    11.00000   -1.20000
H10B  2   -0.136449    0.601310    0.080693    11.00000   -1.20000
AFIX   0
C11   1    0.160084    0.325806    0.091000    11.00000    0.03282    0.03178 =
         0.02113   -0.00665    0.00387    0.00262
AFIX 137
H11A  2    0.062450    0.328814    0.054528    11.00000   -1.50000
H11B  2    0.196472    0.254057    0.079474    11.00000   -1.50000
H11C  2    0.212181    0.378790    0.051417    11.00000   -1.50000
AFIX   0
C15   1    0.378125    0.450367    0.811450    11.00000    0.03130    0.02733 =
         0.01992    0.00222   -0.00342    0.00149
AFIX  23
H15A  2    0.426994    0.388656    0.854562    11.00000   -1.20000
H15B  2    0.287443    0.457006    0.839547    11.00000   -1.20000
AFIX   0
C19   1    0.372231    0.851277    0.743281    11.00000    0.04144    0.02431 =
         0.02916   -0.00515    0.00273    0.00194
AFIX  23
H19A  2    0.408761    0.917169    0.786407    11.00000   -1.20000
H19B  2    0.276747    0.840740    0.759771    11.00000   -1.20000
AFIX   0
C8    1    0.211312    0.397979    0.471538    11.00000    0.01643    0.01778 =
         0.01794    0.00008    0.00136    0.00002
AFIX  13
H8    2    0.305262    0.388090    0.448702    11.00000   -1.20000
AFIX   0
C18   1    0.460816    0.755709    0.796133    11.00000    0.02870    0.02911 =
         0.03795   -0.00206   -0.00617   -0.00315
AFIX  23
H18A  2    0.532550    0.742022    0.744220    11.00000   -1.20000
H18B  2    0.508359    0.774700    0.878868    11.00000   -1.20000
AFIX   0
C13   1    0.231674    0.422899    0.606223    11.00000    0.02201    0.02080 =
         0.01785    0.00113    0.00184    0.00036
AFIX  43
H13   2    0.152071    0.435551    0.643320    11.00000   -1.20000
AFIX   0
C14   1    0.354881    0.428211    0.676279    11.00000    0.02501    0.02299 =
         0.02111   -0.00144   -0.00099    0.00230
AFIX  43
H14   2    0.434015    0.417183    0.638030    11.00000   -1.20000
AFIX   0
C16   1    0.462898    0.553320    0.846887    11.00000    0.02232    0.02870 =
         0.01903   -0.00041   -0.00075    0.00278
AFIX  13
H16   2    0.545849    0.552140    0.804550    11.00000   -1.20000
AFIX   0
C24   1    0.512520    0.550284    0.984932    11.00000    0.03313    0.03338 =
         0.02161   -0.00151   -0.00519    0.00099
AFIX  23
H24A  2    0.431653    0.548147    1.028430    11.00000   -1.20000
H24B  2    0.567347    0.484451    1.006005    11.00000   -1.20000
AFIX   0
C7    1    0.131854    0.293181    0.439578    11.00000    0.01787    0.01785 =
         0.02145    0.00229   -0.00012   -0.00057
AFIX  13
H7    2    0.043951    0.294564    0.474828    11.00000   -1.20000
AFIX   0
C17   1    0.377751    0.652961    0.804494    11.00000    0.02217    0.02914 =
         0.02144    0.00018    0.00184    0.00264
AFIX  23
H17A  2    0.323804    0.638107    0.722999    11.00000   -1.20000
H17B  2    0.311107    0.665556    0.861598    11.00000   -1.20000
AFIX   0
C21   1    0.314187    0.771579    0.533579    11.00000    0.01985    0.02226 =
         0.02466   -0.00189    0.00281   -0.00291
AFIX  43
H21   2    0.220048    0.753009    0.532601    11.00000   -1.20000
AFIX   0
C20   1    0.367937    0.867718    0.604981    11.00000    0.02717    0.02240 =
         0.02922   -0.00600    0.00402   -0.00208
AFIX  23
H20A  2    0.308401    0.929965    0.577938    11.00000   -1.20000
H20B  2    0.462169    0.883842    0.588449    11.00000   -1.20000
AFIX   0
O1W   4    0.354761    0.131569    0.719323    11.00000    0.01952    0.02961 =
         0.02175    0.00422    0.00268    0.00165
C23   1    0.336245    0.610254    0.410951    11.00000    0.01804    0.01959 =
         0.01952    0.00114    0.00279   -0.00052
C22   1    0.389020    0.709857    0.471011    11.00000    0.01886    0.02209 =
         0.02586   -0.00277    0.00344   -0.00500
AFIX  43
H22   2    0.480704    0.731272    0.464987    11.00000   -1.20000
REM #####
REM #####
REM #####
REM #####
AFIX   0
HKLF 4 1 1 0 0 0 1 0 0 0 1


REM  LCYL81_0m_a.res in P2(1)
REM R1 =  0.0324 for    5592 Fo > 4sig(Fo)  and  0.0332 for all    5713 data
REM    344 parameters refined using      1 restraints

END

WGHT      0.0332      0.2250

REM Instructions for potential hydrogen bonds
EQIV $1 -x, y-1/2, -z+1
HTAB O2 O1_$1
EQIV $2 -x, y+1/2, -z+1
HTAB N2 O1W_$2
HTAB O1W O2
EQIV $3 -x+1, y-1/2, -z+1
HTAB O1W O4_$3
EQIV $4 -x+1, y+1/2, -z+2
HTAB O3 O1W_$4
HTAB C4 O4
HTAB C8 O4

REM Highest difference peak  0.203,  deepest hole -0.199,  1-sigma level  0.039
Q1    1   0.3395  0.8259  0.5625  11.00000  0.05    0.15
Q2    1   0.1692  0.3519  0.4591  11.00000  0.05    0.15
Q3    1   0.1732  0.4417  0.4356  11.00000  0.05    0.14
Q4    1   0.1447  0.4042  0.2412  11.00000  0.05    0.14
Q5    1   0.3980  0.0232  0.8190  11.00000  0.05    0.14
;
_shelx_res_checksum                     91890

_shelx_hkl_file                         
;
   1   0   0 2048.20   91.99
   2   0   0 1019.10   69.89
   3   0   0  729.33   51.79
   3   0   0  687.13   67.39
   4   0   0  984.30   89.99
   4   0   0  673.43   92.29
   4   0   0  913.01   63.49
   5   0   0 5661.43  242.18
   5   0   0 5800.22  300.97
   6   0   0  500.15   46.50
   6   0   0  413.26   80.69
   6   0   0  322.97   82.49
  -7   0   0  845.42   36.10
  -7   0   0  880.41   49.10
  -7   0   0  853.51   38.70
  -7   0   0  793.82   38.30
  -7   0   0  969.90   41.90
  -7   0   0  795.92   34.90
  -7   0   0  902.41   34.50
   7   0   0  585.14  189.28
  -7   0   0  897.71   38.40
  -7   0   0  837.82   39.30
  -7   0   0  871.11   37.20
  -7   0   0  879.61   35.10
  -7   0   0  873.51   38.10
  -7   0   0  842.82   36.20
  -7   0   0  899.81   39.30
  -7   0   0  878.01   39.60
  -8   0   0  385.86   23.20
  -8   0   0  387.36   21.10
  -8   0   0  376.76   20.20
  -8   0   0  354.36   18.60
  -8   0   0  354.46   18.10
  -8   0   0  378.66   18.50
  -8   0   0  350.06   19.50
  -8   0   0  369.06   20.50
  -8   0   0  374.66   19.90
  -8   0   0  365.96   21.60
  -8   0   0  373.76   22.30
  -8   0   0  397.16   18.20
  -8   0   0  354.86   32.40
  -8   0   0  407.06   23.60
  -8   0   0  365.16   21.70
   8   0   0  284.57   61.49
   8   0   0  331.57  131.79
  -8   0   0  343.77   20.20
  -8   0   0  358.96   21.90
  -8   0   0  360.16   21.20
  -8   0   0  366.96   21.30
  -9   0   0   38.40    5.60
  -9   0   0   49.20    5.10
  -9   0   0   33.70    4.90
  -9   0   0   53.89    8.90
  -9   0   0   57.49   10.30
  -9   0   0   48.50    6.50
  -9   0   0   46.40    5.10
  -9   0   0   51.89   22.10
  -9   0   0   49.20    7.60
  -9   0   0   39.60    6.40
  -9   0   0   41.70    6.40
  -9   0   0   50.69   11.50
  -9   0   0   40.80    5.70
  -9   0   0   37.30    6.50
  -9   0   0   41.00    6.40
  -9   0   0   40.90    8.10
  -9   0   0   41.70    6.10
 -10   0   0    6.10    2.40
 -10   0   0    4.10    5.30
 -10   0   0    8.40    3.10
 -10   0   0    6.20    3.30
 -10   0   0    7.20    2.80
 -10   0   0    6.20    2.70
 -10   0   0    6.60    9.70
 -10   0   0    5.70    3.00
 -10   0   0   10.80    5.20
 -10   0   0    9.10    2.60
 -10   0   0    7.70    2.70
 -10   0   0    4.40    1.90
 -10   0   0    7.50    3.10
 -11   0   0    2.40    2.10
 -11   0   0    0.50    2.00
 -11   0   0    2.70    2.70
 -11   0   0    3.80    2.10
 -11   0   0    3.90    2.20
 -11   0   0    1.70    1.40
 -11   0   0   -2.80    5.90
 -11   0   0   -0.50    2.00
 -11   0   0    2.10    2.70
 -12   0   0   96.69    7.10
   0  -1   0    1.80    1.40
   0  -1   0   -1.20    1.60
   0  -1   0    2.60    1.70
   0  -1   0    1.70    0.90
   0  -1   0   -1.50    2.60
   0   1   0    0.00    1.30
   0   1   0    1.80    0.90
   0   1   0    2.70    1.40
   0   1   0    3.20    2.50
  -1  -1   0 3781.62  132.59
   1  -1   0 3779.12  134.09
  -1  -1   0 3640.04  163.58
   1   1   0 3879.01  133.89
   1   1   0 3540.65  159.58
   1   1   0 3938.31  141.39
  -2  -1   0 4805.12  224.08
   2   1   0 5153.98  188.08
   2   1   0 4614.54  216.18
   3  -1   0  918.61   77.59
   3   1   0  969.70   83.39
   3   1   0  922.11   57.49
   4  -1   0 5018.30  250.07
   4  -1   0 4247.77  264.47
   4   1   0 5266.17  262.67
   4   1   0 4154.38  289.97
   4   1   0 5451.75  207.58
   5  -1   0 2028.60  153.28
   5  -1   0 1715.53  167.08
   5  -1   0 2091.29  121.19
   5   1   0 2212.18  166.18
   5   1   0 2113.59  111.19
   6  -1   0  301.27   74.99
   6  -1   0  379.26   45.90
   6  -1   0  428.26   70.79
   6   1   0  299.27  102.79
   6   1   0  364.16   69.89
   6   1   0  318.77   36.90
  -7  -1   0  156.18    9.70
  -7  -1   0  158.98   10.10
   7  -1   0  193.18   74.89
  -7  -1   0  140.39   10.30
  -7  -1   0  157.48   10.90
  -7  -1   0  156.98   12.60
  -7  -1   0  145.29   10.60
  -7  -1   0  160.48   10.60
  -7  -1   0  148.89   12.20
  -7  -1   0  122.79   19.70
  -7  -1   0  164.98   12.30
  -7  -1   0  151.28   11.60
   7  -1   0  176.38   32.20
  -7  -1   0  161.58   13.10
  -7  -1   0  160.78   12.40
  -7  -1   0  151.28    9.30
   7  -1   0  161.28   34.70
  -7  -1   0  160.68   12.50
  -7   1   0  154.98   10.30
  -7   1   0  159.48   12.70
  -7   1   0  157.68    9.50
  -7   1   0  132.29   15.90
  -7   1   0  149.88    9.80
   7   1   0   41.60   88.49
  -7   1   0  144.79   12.10
  -7   1   0  167.48   11.30
  -7   1   0  165.88   11.20
  -7   1   0  159.18   13.90
  -7   1   0  173.48   15.20
  -7   1   0  147.59   11.80
  -7   1   0  171.48   12.30
  -7   1   0  156.78   11.20
  -7   1   0  183.18   18.10
  -7   1   0  154.38   11.70
  -7   1   0  140.39   10.00
  -7   1   0  143.49   12.10
   7   1   0  116.99   67.39
  -8  -1   0    3.30    2.30
  -8  -1   0   10.20    2.50
  -8  -1   0    9.10    4.30
  -8  -1   0    6.10    3.20
  -8  -1   0   -2.40   17.20
  -8  -1   0    6.30    3.50
  -8  -1   0   12.90    5.00
  -8  -1   0    3.10    3.00
  -8  -1   0   15.40    6.50
  -8  -1   0   13.80    8.20
  -8  -1   0   12.00    7.20
   8  -1   0   73.19   29.20
  -8  -1   0    7.30    4.20
  -8  -1   0    5.50    2.50
  -8  -1   0    8.50    2.80
  -8  -1   0   13.20    4.20
  -8  -1   0    8.40    3.10
  -8  -1   0    7.50    3.60
  -8  -1   0    9.40    3.50
  -8  -1   0    6.20    2.70
  -8   1   0   10.50    9.30
  -8   1   0    7.50    3.20
  -8   1   0    9.40    4.00
  -8   1   0    7.90    2.70
  -8   1   0    8.90    4.00
  -8   1   0    1.00    2.70
  -8   1   0    5.20    2.50
  -8   1   0    8.40    3.70
  -8   1   0    9.50    4.00
  -8   1   0    9.10    4.20
  -8   1   0    6.20    3.60
   8   1   0  -16.60   62.49
  -8   1   0   12.00    4.10
  -8   1   0    8.30    3.90
  -8   1   0    6.50    3.80
  -8   1   0    5.80    3.20
  -8   1   0    8.70    4.60
  -8   1   0   12.90    4.80
  -8   1   0    8.60    2.80
  -8   1   0    6.20    3.30
  -8   1   0    6.30    3.70
  -9  -1   0   11.10    4.00
  -9  -1   0    9.40    2.80
  -9  -1   0    9.00    3.50
  -9  -1   0   12.70    4.00
  -9  -1   0    7.80    3.30
  -9  -1   0   11.80    3.30
  -9  -1   0   17.50    6.40
  -9  -1   0   -1.40    9.20
  -9  -1   0   14.80    3.70
  -9  -1   0    6.70    3.70
  -9  -1   0   10.00    3.10
  -9  -1   0    4.30    2.70
  -9  -1   0    9.70    3.00
  -9  -1   0    8.00    3.10
  -9  -1   0    8.00    3.00
  -9   1   0    9.20    3.40
  -9   1   0    8.60    3.10
  -9   1   0   12.00    2.50
  -9   1   0   12.60    3.30
  -9   1   0   10.70    4.20
  -9   1   0   11.10    4.40
  -9   1   0   12.20    5.50
  -9   1   0    9.90    3.40
  -9   1   0   11.80    5.40
  -9   1   0    8.10    4.30
  -9   1   0    8.60    5.90
  -9   1   0   10.50    3.00
  -9   1   0    7.90    3.30
  -9   1   0    8.50    3.20
  -9   1   0    1.60    6.60
  -9   1   0   20.60   14.60
  -9   1   0   13.80    3.90
  -9   1   0   17.50    7.80
  -9   1   0   10.30    3.70
 -10  -1   0  125.89   10.30
 -10  -1   0  125.79   10.60
 -10  -1   0  128.89   10.80
 -10  -1   0  126.89    9.10
 -10  -1   0  130.59   12.40
 -10  -1   0  132.39   12.20
 -10  -1   0  141.29    9.40
 -10  -1   0  131.49    9.60
 -10  -1   0  120.99    8.90
 -10  -1   0  122.89   10.20
 -10  -1   0  124.29   11.20
 -10   1   0  128.19   15.80
 -10   1   0  126.09   10.70
 -10   1   0  115.59   10.10
 -10   1   0  144.19   11.30
 -10   1   0  124.19    9.10
 -10   1   0  124.59    8.80
 -10   1   0  138.79   10.20
 -10   1   0  125.49    8.50
 -10   1   0  124.19   11.50
 -10   1   0  115.49   24.40
 -10   1   0  132.59   12.60
 -10   1   0  126.89   11.10
 -10   1   0  122.19   10.80
 -10   1   0  141.39   13.30
 -11  -1   0   17.60    3.40
 -11  -1   0   12.30    3.00
 -11  -1   0   10.80    3.00
 -11  -1   0   14.20    3.40
 -11  -1   0   13.20    4.20
 -11  -1   0   13.80    2.90
 -11  -1   0   16.60    3.80
 -11  -1   0   14.40    4.00
 -11   1   0   14.90    2.60
 -11   1   0   20.30    4.40
 -11   1   0   17.10    3.50
 -11   1   0   18.10    4.10
 -11   1   0   12.00    3.70
 -11   1   0   21.90    7.20
 -11   1   0   11.40    3.50
 -11   1   0   17.30    4.50
 -11   1   0   17.50    4.90
 -12  -1   0  118.49    8.70
 -12  -1   0  117.69    7.60
 -12  -1   0  157.58    8.60
 -12   1   0  154.78    9.10
   0  -2   0  334.87   21.90
   0  -2   0  305.97   32.30
   0  -2   0  326.57   16.40
   0   2   0  319.57   30.60
   0   2   0  337.57   23.70
   0   2   0  274.57   30.40
   1  -2   0 1103.09   43.90
   1  -2   0 1112.19   61.89
   1  -2   0 1125.79   56.19
  -1  -2   0 1056.89   78.09
  -1  -2   0 1074.89   48.10
  -1   2   0 1051.29   58.29
   1   2   0 1098.79   74.39
   1   2   0 1161.28   56.19
  -2  -2   0 6580.44  235.48
   2  -2   0 6900.71  258.67
  -2  -2   0 6819.22  308.97
   2  -2   0 6881.61  237.38
   2   2   0 5991.10  287.27
   2   2   0 6752.12  250.97
   3  -2   0 1770.62   81.19
   3   2   0 1780.62   88.99
   3   2   0 1618.84  123.79
   4  -2   0  140.79   35.80
   4  -2   0  125.89   39.80
   4   2   0  185.48   23.70
   4   2   0  133.89   42.00
   5  -2   0  592.04   76.29
   5  -2   0  601.14   49.10
   5  -2   0  467.25   74.39
   5   2   0  709.33   92.79
   5   2   0  588.54   50.99
   5   2   0  558.54  105.29
   6  -2   0   59.19   17.40
   6  -2   0  123.09   38.20
   6  -2   0   58.99   44.40
   6   2   0   50.79   21.40
   6   2   0  102.19   37.70
   6   2   0  102.19   54.79
  -7  -2   0   20.10    3.90
  -7  -2   0   25.60    3.30
  -7  -2   0   25.50    4.70
   7  -2   0  138.39   88.39
   7  -2   0   45.50   19.30
  -7  -2   0   24.80    4.30
  -7  -2   0   19.20    5.90
  -7  -2   0   29.00    6.00
  -7  -2   0   23.40    4.80
  -7  -2   0   25.40    6.00
  -7  -2   0   26.70    3.90
  -7  -2   0   23.20    4.30
  -7  -2   0   26.50    5.90
  -7  -2   0   28.10    3.80
   7  -2   0   29.10   19.30
  -7  -2   0   24.70    5.50
  -7  -2   0   25.50    3.70
  -7  -2   0   24.90    5.00
  -7   2   0   29.70    8.60
  -7   2   0   25.20    5.00
  -7   2   0   23.30    4.50
   7   2   0   -8.60   35.90
  -7   2   0   33.30    7.20
  -7   2   0   27.30    6.00
   7   2   0   10.10   58.19
  -7   2   0   28.60    4.20
  -7   2   0   39.50    6.50
  -7   2   0   22.60    4.80
  -7   2   0   27.80    4.90
  -7   2   0   26.50    6.00
  -7   2   0   26.60    5.70
  -7   2   0   18.40    4.30
  -7   2   0   31.40    7.60
  -7   2   0   31.80    7.00
  -7   2   0   27.00    4.20
  -7   2   0   23.50    4.10
  -7   2   0   27.60    6.40
  -7   2   0   26.30    5.60
  -7   2   0   25.00    5.30
  -8  -2   0   62.09    6.50
  -8  -2   0   33.20   13.00
  -8  -2   0   62.99    9.30
  -8  -2   0   66.59    7.70
  -8  -2   0   60.29    5.80
  -8  -2   0   57.09   16.70
  -8  -2   0   63.29   12.20
  -8  -2   0   63.09    7.90
  -8  -2   0   52.69    6.80
  -8  -2   0   65.89   11.40
  -8  -2   0   55.49    7.10
  -8   2   0   64.39   14.30
  -8   2   0   56.49    7.40
  -8   2   0   60.99    8.80
  -8   2   0   66.99   11.70
  -8   2   0   59.09    8.30
  -8   2   0   79.99   13.30
  -8   2   0   60.99    6.80
  -8   2   0   56.59   11.50
  -8   2   0   64.19   11.20
  -8   2   0   51.59    6.50
  -8   2   0   52.59    6.00
  -8   2   0   64.79    7.20
  -8   2   0   55.59    8.00
   8   2   0  157.18   80.49
  -8   2   0   59.89    7.90
  -8   2   0   62.59    6.10
  -8   2   0   58.09    8.30
  -9  -2   0   35.70    5.90
  -9  -2   0   33.40    5.00
  -9  -2   0   37.00    5.00
  -9  -2   0   34.80    5.40
  -9  -2   0   32.60    4.90
  -9  -2   0   35.30    7.10
  -9  -2   0   42.40    5.80
  -9  -2   0   33.60    4.40
  -9  -2   0   30.60    5.90
  -9  -2   0   34.30    6.20
  -9  -2   0   34.80    5.60
  -9   2   0   31.30    4.90
  -9   2   0   35.30    7.20
  -9   2   0   40.40    7.30
  -9   2   0   30.00    6.40
  -9   2   0   30.80    6.80
  -9   2   0   37.20    6.40
  -9   2   0   39.60    6.80
  -9   2   0   39.50    9.00
  -9   2   0   35.80    4.60
  -9   2   0   35.10    5.10
  -9   2   0   28.10    7.00
  -9   2   0   35.50    5.30
  -9   2   0   36.20    7.00
  -9   2   0   31.70   13.20
  -9   2   0   37.60    5.90
  -9   2   0   44.60    7.90
  -9   2   0   26.30    5.20
  -9   2   0   33.10    4.30
  -9   2   0   39.30    6.10
 -10  -2   0   16.60    4.70
 -10  -2   0    9.00    5.90
 -10  -2   0   15.40    3.40
 -10  -2   0   17.60    4.10
 -10  -2   0   14.90    3.40
 -10  -2   0   20.20    5.30
 -10  -2   0   20.70    3.90
 -10  -2   0   14.60    4.10
 -10  -2   0   17.80    4.10
 -10  -2   0   15.10    3.70
 -10  -2   0   22.90    4.30
 -10   2   0   22.60    6.50
 -10   2   0   38.90    8.40
 -10   2   0   13.40    4.10
 -10   2   0   34.10   10.60
 -10   2   0   19.60    3.30
 -10   2   0   15.90    4.20
 -10   2   0   21.80    5.30
 -10   2   0   18.70    3.60
 -10   2   0   26.00   18.10
 -10   2   0   17.40    4.50
 -10   2   0   26.10    7.20
 -10   2   0   17.40    4.90
 -10   2   0   24.00    5.90
 -10   2   0   18.60    3.90
 -10   2   0   15.20    4.90
 -11  -2   0   82.19    7.10
 -11  -2   0   86.19    8.20
 -11  -2   0   78.29    7.10
 -11  -2   0   73.69    9.00
 -11  -2   0   75.29    6.10
 -11  -2   0   90.09    6.50
 -11  -2   0   72.29    8.20
 -11  -2   0   87.59    7.20
 -11   2   0   74.29    7.40
 -11   2   0   91.19    8.50
 -11   2   0   90.59    8.70
 -11   2   0   70.99    7.90
 -11   2   0   81.99   12.10
 -11   2   0   94.29    9.20
 -11   2   0   65.39    8.90
 -11   2   0  102.59   12.00
 -12  -2   0   11.80    3.00
 -12  -2   0   14.70    2.90
 -12  -2   0   15.20    2.70
   0  -3   0    1.80    2.30
   0  -3   0    6.40   11.00
   0  -3   0    1.00    1.60
   0   3   0    4.60    3.80
   0   3   0   10.20    7.70
   1  -3   0 1344.17   67.39
  -1  -3   0 1193.28   59.29
  -1  -3   0 1321.67  101.09
   1  -3   0 1211.18   51.89
   1   3   0 1322.77   69.39
  -1   3   0 1387.86   60.39
  -1   3   0 1198.48   74.69
   1   3   0 1367.66  101.99
   2  -3   0 5366.06  234.38
   2  -3   0 6068.69  251.67
   2  -3   0 6370.46  215.28
  -2  -3   0 6613.34  222.78
   2   3   0 6460.75  291.67
   2   3   0 6160.88  237.18
   2   3   0 5202.68  308.77
   3  -3   0  217.98   18.20
   3  -3   0  144.49   30.20
  -3  -3   0  185.78   17.60
   3  -3   0  178.48   25.80
   3   3   0  224.88   42.80
   3   3   0  207.78   71.09
   3   3   0  187.18   25.30
   4  -3   0  831.62   77.69
   4  -3   0 1007.00   63.19
  -4  -3   0  996.10   39.30
   4   3   0 1026.10   67.39
   4   3   0 1056.69  107.69
   4   3   0  711.83  117.29
  -5  -3   0  230.08   14.00
   5  -3   0  304.07   49.30
   5  -3   0  227.68   25.80
   5  -3   0  273.77   37.50
   5  -3   0  305.47   56.69
   5   3   0  136.29   64.19
   5   3   0  357.26   88.49
   5   3   0  256.57   34.00
   6  -3   0  176.48   51.69
   6  -3   0   63.69   24.40
   6  -3   0   96.89   21.30
   6  -3   0    9.40   28.60
   6   3   0  155.28   66.49
   6   3   0   81.29   29.70
   6   3   0   32.20   42.40
  -7  -3   0 1040.90   41.00
  -7  -3   0  984.10   40.70
  -7  -3   0 1042.80   42.90
   7  -3   0  961.40   83.69
  -7  -3   0  986.90   41.20
   7  -3   0 1025.70   70.79
  -7  -3   0  995.90   43.10
  -7  -3   0 1003.40   41.60
  -7  -3   0 1018.50   40.40
  -7  -3   0  971.40   41.20
  -7  -3   0 1003.30   39.20
  -7  -3   0 1012.30   40.90
  -7  -3   0 1006.90   44.70
  -7  -3   0 1048.00   45.20
  -7   3   0  991.80   44.70
  -7   3   0 1019.50   43.80
  -7   3   0 1079.19   53.99
  -7   3   0 1060.29   46.20
  -7   3   0 1023.80   41.50
  -7   3   0 1037.50   45.60
  -7   3   0 1015.20   42.10
   7   3   0  802.92  169.38
  -7   3   0 1081.59   46.60
  -7   3   0 1071.69   43.20
  -7   3   0 1026.10   43.80
  -7   3   0  932.41   41.10
  -7   3   0 1058.59   46.80
  -7   3   0 1042.80   48.90
  -7   3   0  955.20   39.80
  -7   3   0  990.20   44.50
   7   3   0  951.40  145.09
  -7   3   0 1029.70   39.70
  -7   3   0 1026.60   44.20
  -7   3   0 1063.39   45.40
  -7   3   0 1020.20   39.60
  -7   3   0 1008.90   46.20
  -8  -3   0  385.86   19.40
  -8  -3   0  368.06   19.90
  -8  -3   0  383.66   21.70
  -8  -3   0  382.86   23.60
  -8  -3   0  389.66   20.00
  -8  -3   0  393.16   22.30
  -8  -3   0  396.86   20.70
  -8  -3   0  418.86   20.40
  -8  -3   0  400.26   21.00
  -8  -3   0  393.26   21.00
  -8  -3   0  396.86   22.10
  -8  -3   0  399.16   18.60
  -8   3   0  377.56   19.30
  -8   3   0  401.66   24.40
  -8   3   0  420.96   23.80
  -8   3   0  401.26   24.60
  -8   3   0  396.66   19.00
  -8   3   0  394.86   20.50
   8   3   0  562.44  144.39
  -8   3   0  386.96   20.20
  -8   3   0  401.96   23.80
  -8   3   0  410.16   21.90
  -8   3   0  405.36   29.40
  -8   3   0  409.36   23.00
  -8   3   0  415.66   26.00
  -8   3   0  409.66   24.70
  -8   3   0  401.66   19.00
  -8   3   0  400.36   22.80
  -8   3   0  428.26   23.30
  -8   3   0  389.66   23.20
  -8   3   0  386.56   23.50
  -8   3   0  371.56   30.00
  -8   3   0  362.56   20.40
  -9  -3   0  303.37   18.00
  -9  -3   0  296.87   16.70
  -9  -3   0  317.87   19.00
  -9  -3   0  312.87   18.10
  -9  -3   0  314.47   21.00
  -9  -3   0  300.37   17.20
  -9  -3   0  317.87   16.70
  -9  -3   0  315.37   15.60
  -9  -3   0  306.47   18.90
  -9  -3   0  284.97   16.40
  -9   3   0  275.57   19.60
  -9   3   0  333.17   15.90
  -9   3   0  301.77   15.70
  -9   3   0  282.57   19.20
  -9   3   0  325.37   19.70
  -9   3   0  319.57   21.90
  -9   3   0  302.37   17.30
  -9   3   0  304.57   18.30
  -9   3   0  292.27   19.30
  -9   3   0  313.07   19.50
  -9   3   0  274.67   18.80
  -9   3   0  311.97   20.40
  -9   3   0  330.77   21.60
  -9   3   0  314.17   19.70
  -9   3   0  291.97   15.40
  -9   3   0  277.17   20.70
  -9   3   0  321.47   28.50
  -9   3   0  303.87   18.20
 -10  -3   0   29.60    4.50
 -10  -3   0   19.40    4.50
 -10  -3   0   27.10    6.30
 -10  -3   0   33.20    4.50
 -10  -3   0   33.80    5.20
 -10  -3   0   24.20    4.80
 -10  -3   0   31.90    4.30
 -10  -3   0   29.20    3.90
 -10  -3   0   29.90    5.00
 -10   3   0   47.40    7.70
 -10   3   0   30.30   16.10
 -10   3   0   48.40    5.70
 -10   3   0   26.70    6.10
 -10   3   0   21.60    5.90
 -10   3   0   26.30    6.50
 -10   3   0   43.10    9.80
 -10   3   0   25.20    6.90
 -10   3   0   21.20    6.90
 -10   3   0   27.30    6.00
 -10   3   0   19.60    5.40
 -10   3   0   39.30    5.00
 -10   3   0   37.40    6.40
 -10   3   0   37.70    7.90
 -10   3   0   25.00    5.30
 -10   3   0   31.00    7.80
 -11  -3   0   10.00    2.70
 -11  -3   0   10.80    3.30
 -11  -3   0   12.80    3.90
 -11  -3   0   12.30    2.90
 -11  -3   0    9.70    3.30
 -11  -3   0   10.60    2.80
 -11  -3   0   11.70    2.60
 -11  -3   0   12.50    2.90
 -11   3   0   20.10    6.10
 -11   3   0   20.80    5.40
 -11   3   0    2.50    4.00
 -11   3   0   26.80    7.90
 -11   3   0   28.50    9.10
 -12  -3   0   29.30    3.00
 -12  -3   0   43.80    6.20
 -12  -3   0   31.20    3.20
   0  -4   0  597.04   42.00
   0  -4   0  694.33   32.50
   0   4   0  534.35   59.29
   0   4   0  541.75   43.70
   0   4   0  547.05   56.69
   1  -4   0 4759.42  185.38
   1  -4   0 4517.55  160.88
  -1  -4   0 4798.42  175.88
   1   4   0 3758.22  236.28
   1   4   0 4265.87  219.98
   1   4   0 4406.96  189.48
  -1   4   0 4375.96  200.48
   2  -4   0 6484.05  218.48
  -2  -4   0 6362.56  230.58
   2  -4   0 6314.17  246.38
   2   4   0 5809.62  245.48
   2   4   0 6085.79  298.07
   2   4   0 5423.06  328.97
   3  -4   0  700.03   36.90
  -3  -4   0  665.33   30.50
   3  -4   0  631.34   53.79
  -3  -4   0  679.23   41.60
   3   4   0  676.73   83.99
   3   4   0  660.23   53.69
   3   4   0  542.35   95.99
   4  -4   0 1614.94   72.99
   4  -4   0 1589.74   98.69
  -4  -4   0 1544.85   61.19
   4   4   0 1550.54  143.49
   4   4   0 1432.76   92.59
  -5  -4   0 1399.06   57.39
   5  -4   0 1451.75   73.59
   5  -4   0 1651.43  140.89
   5  -4   0 1493.35  124.59
   5   4   0 1476.65  152.18
   5   4   0 1459.55   93.49
   5   4   0 1184.98  175.88
  -6  -4   0    7.70    2.30
  -6  -4   0    7.90    3.10
  -6  -4   0    2.20    1.80
  -6  -4   0    8.30    2.50
  -6  -4   0    4.90    1.90
  -6  -4   0    5.90    2.10
  -6  -4   0   11.10    3.30
   6  -4   0    2.30    9.80
  -6  -4   0    6.30    3.60
  -6   4   0   13.70    4.10
  -6   4   0    9.90    2.90
  -6   4   0    0.70    2.20
  -6   4   0    6.20    2.10
  -6   4   0    8.50    4.00
   6   4   0  -19.10   30.80
  -6   4   0    5.70    3.00
  -6   4   0    4.80    3.80
   6   4   0   39.40   22.40
  -6   4   0   12.10    3.90
  -6   4   0    6.70    3.40
  -6   4   0    7.10    2.50
  -6   4   0    8.50    2.70
  -6   4   0    1.10    2.20
  -6   4   0    9.40    3.00
   6   4   0  -20.00   24.30
  -7  -4   0 1430.76   57.69
  -7  -4   0 1360.36   53.19
   7  -4   0 1259.57  105.79
  -7  -4   0 1361.16   54.29
  -7  -4   0 1418.96   53.29
  -7  -4   0 1375.96   53.69
  -7  -4   0 1297.67   54.79
  -7  -4   0 1370.66   52.79
  -7  -4   0 1323.27   53.79
  -7  -4   0 1365.16   51.29
  -7  -4   0 1311.77   52.69
  -7  -4   0 1436.06   55.29
  -7   4   0 1368.36   53.89
  -7   4   0 1329.37   58.29
  -7   4   0 1399.46   58.99
  -7   4   0 1352.76   60.09
  -7   4   0 1374.06   51.79
   7   4   0 1048.30  207.28
  -7   4   0 1451.75   58.39
  -7   4   0 1285.87   53.59
  -7   4   0 1412.06   57.69
  -7   4   0 1355.86   58.09
  -7   4   0 1397.36   55.59
  -7   4   0 1435.46   56.49
  -7   4   0 1412.86   59.99
  -7   4   0 1379.86   54.69
  -7   4   0 1475.25   67.79
  -7   4   0 1316.07   56.59
   7   4   0 1649.93  185.28
  -7   4   0 1393.96   59.59
  -7   4   0 1417.76   59.49
  -7   4   0 1447.66   58.79
  -8  -4   0  289.57   16.80
  -8  -4   0  285.17   14.60
  -8  -4   0  286.67   15.80
  -8  -4   0  288.57   17.90
  -8  -4   0  278.97   15.70
  -8  -4   0  272.37   17.20
  -8  -4   0  291.07   16.20
  -8  -4   0  299.87   19.60
  -8  -4   0  287.57   16.80
  -8  -4   0  280.77   16.00
  -8   4   0  300.87   19.80
  -8   4   0  298.77   25.90
  -8   4   0  280.07   19.30
  -8   4   0  302.87   16.70
  -8   4   0  283.47   20.20
   8   4   0  411.96  135.29
  -8   4   0  295.27   15.10
  -8   4   0  280.57   18.10
  -8   4   0  257.67   18.60
  -8   4   0  279.97   14.90
  -8   4   0  295.97   20.80
  -8   4   0  300.37   19.20
  -8   4   0  291.77   19.20
  -8   4   0  274.07   16.60
  -8   4   0  289.77   21.20
  -8   4   0  277.77   20.10
  -8   4   0  304.87   19.80
  -8   4   0  299.17   16.70
  -8   4   0  285.27   20.30
  -8   4   0  286.17   17.80
  -9  -4   0   58.59    6.50
  -9  -4   0   54.99    7.60
  -9  -4   0   61.39    6.60
  -9  -4   0   61.19    8.50
  -9  -4   0   60.69   14.30
  -9  -4   0   65.19    6.90
  -9  -4   0   60.69    6.80
  -9  -4   0   54.19    5.90
  -9  -4   0   60.09    6.10
  -9   4   0   54.69    9.60
  -9   4   0   50.19    7.70
  -9   4   0   60.09    6.90
  -9   4   0   72.19    9.50
  -9   4   0   67.69    7.70
  -9   4   0   69.49    9.10
  -9   4   0   75.69   13.90
  -9   4   0   64.49    9.50
  -9   4   0   62.39   10.10
  -9   4   0   63.29    9.30
  -9   4   0   71.89   10.30
  -9   4   0   62.89   10.70
  -9   4   0   57.19    8.80
  -9   4   0   55.39   12.40
  -9   4   0   74.49    8.50
  -9   4   0   58.39   12.30
  -9   4   0   71.99    6.50
 -10  -4   0   44.70    5.60
 -10  -4   0   44.90    6.70
 -10  -4   0   47.70    6.40
 -10  -4   0   43.50    4.80
 -10  -4   0   42.00    5.10
 -10  -4   0   36.00    5.10
 -10  -4   0   48.80    5.70
 -10  -4   0   41.60    5.60
 -10   4   0   38.50    7.60
 -10   4   0   44.30    9.00
 -10   4   0   67.79    8.80
 -10   4   0   22.50    9.60
 -10   4   0   38.80   14.00
 -10   4   0   43.50    8.00
 -10   4   0   62.29    8.20
 -10   4   0   59.09   11.50
 -10   4   0   65.59   11.50
 -11  -4   0   13.00    3.30
 -11  -4   0   21.60    2.90
 -11  -4   0   16.60    4.10
 -11  -4   0   25.60    4.60
 -11  -4   0   24.10    3.40
 -11  -4   0   20.40    3.80
 -11  -4   0   24.90    3.30
 -11  -4   0   15.70    3.20
 -11   4   0   18.70    8.20
 -11   4   0   31.80    7.80
   0  -5   0    2.80    3.40
   0  -5   0    2.10    3.30
   0   5   0   -3.00    3.90
   0   5   0  -10.20    6.60
   0   5   0   13.70   10.20
   1  -5   0  780.32   39.60
  -1  -5   0  779.52   51.29
   1   5   0  638.24   86.99
  -1   5   0  738.83   68.89
   1   5   0  715.93   56.89
   1   5   0  783.92   81.99
  -1   5   0  804.02   55.09
  -2  -5   0 1927.41   72.19
   2  -5   0 1808.32   76.49
   2  -5   0 1689.43  100.09
  -2  -5   0 1904.51   91.49
   2   5   0 1887.51  144.19
   2   5   0 1630.84  163.28
   2   5   0 1863.31  104.99
   3  -5   0 3145.19  124.89
   3  -5   0 3257.27  159.18
  -3  -5   0 3265.27  137.19
  -3  -5   0 3120.09  117.79
   3   5   0 3335.47  159.68
   3   5   0 3013.20  209.08
   4  -5   0 1772.82  111.79
  -4  -5   0 1807.52   71.99
   4  -5   0 1767.42   79.79
  -4  -5   0 1835.62   88.59
   4   5   0 1819.72  161.68
   4   5   0 1875.31  112.09
   5  -5   0 1633.44  108.19
   5  -5   0 1490.05   71.69
  -5  -5   0 1501.25   60.99
   5   5   0 1138.79  180.08
   5   5   0 1600.24  163.68
   5   5   0 1426.86   98.29
  -6  -5   0  938.01   41.50
  -6  -5   0  895.11   41.90
  -6  -5   0  967.80   38.60
  -6  -5   0  934.41   38.50
  -6  -5   0  956.30   38.70
  -6  -5   0  862.51   37.40
  -6  -5   0  992.20   38.70
  -6  -5   0  904.71   37.30
  -6  -5   0  951.10   39.50
   6  -5   0  919.91   84.09
  -6   5   0  903.91   43.30
  -6   5   0  984.90   44.00
  -6   5   0  946.11   43.70
  -6   5   0  966.50   40.80
  -6   5   0  942.21   39.20
  -6   5   0  958.80   43.40
  -6   5   0  976.40   40.90
  -6   5   0  954.00   37.00
  -6   5   0 1070.69   51.79
  -6   5   0  971.60   42.70
  -6   5   0  924.11   44.40
   6   5   0  983.00   80.09
   6   5   0  916.61  171.38
  -6   5   0  976.60   42.60
  -6   5   0  947.41   43.90
  -6   5   0  992.70   51.19
  -6   5   0  941.01   40.50
  -6   5   0  987.40   43.60
   6   5   0 1076.69  129.79
  -7  -5   0  270.57   13.90
  -7  -5   0  289.37   15.20
  -7  -5   0  283.17   15.40
  -7  -5   0  301.97   16.00
  -7  -5   0  282.17   16.60
  -7  -5   0  276.67   17.00
  -7  -5   0  269.27   15.80
   7  -5   0  372.16   66.19
  -7  -5   0  286.47   18.40
  -7  -5   0  278.47   15.90
  -7  -5   0  295.37   15.60
  -7   5   0  277.27   19.60
  -7   5   0  279.87   19.60
  -7   5   0  266.97   19.40
  -7   5   0  310.67   25.10
  -7   5   0  281.67   19.50
   7   5   0  268.67  117.19
  -7   5   0  291.97   14.50
  -7   5   0  288.87   20.20
  -7   5   0  300.97   23.10
   7   5   0  226.78   29.80
  -7   5   0  288.17   16.80
  -7   5   0  294.87   17.90
  -7   5   0  280.47   20.40
  -7   5   0  281.27   19.20
  -7   5   0  292.57   16.20
  -7   5   0  287.27   19.40
  -7   5   0  272.47   15.90
  -7   5   0  278.77   19.20
  -7   5   0  290.87   17.50
  -7   5   0  284.07   19.90
  -8  -5   0  798.82   32.90
  -8  -5   0  853.31   39.80
  -8  -5   0  833.82   36.80
  -8  -5   0  808.32   36.00
  -8  -5   0  843.42   36.20
  -8  -5   0  918.41   36.20
  -8  -5   0  852.11   37.80
  -8  -5   0  838.92   35.30
  -8  -5   0  849.81   34.90
  -8  -5   0  822.62   34.60
  -8   5   0  774.42   40.80
  -8   5   0  820.62   41.90
  -8   5   0  889.61   42.10
  -8   5   0  808.62   40.10
  -8   5   0  817.62   37.80
  -8   5   0  849.12   40.20
  -8   5   0  887.71   34.10
  -8   5   0  803.22   40.40
  -8   5   0  739.73   41.10
  -8   5   0  789.82   47.50
  -8   5   0  831.72   41.40
  -8   5   0  853.01   41.10
  -8   5   0  854.31   40.50
  -8   5   0  848.72   35.90
  -8   5   0  838.02   35.80
  -8   5   0  824.62   40.90
  -8   5   0  833.52   36.00
  -8   5   0  851.91   37.90
  -9  -5   0  299.97   17.00
  -9  -5   0  302.37   16.40
  -9  -5   0  300.17   19.70
  -9  -5   0  273.97   16.80
  -9  -5   0  293.67   15.40
  -9  -5   0  285.67   16.00
  -9  -5   0  292.67   15.70
  -9  -5   0  278.97   16.50
  -9  -5   0  253.27   16.70
  -9   5   0  316.67   19.10
  -9   5   0  315.07   20.50
  -9   5   0  283.27   19.70
  -9   5   0  282.87   20.90
  -9   5   0  249.08   18.50
  -9   5   0  311.97   21.10
  -9   5   0  280.27   19.30
  -9   5   0  302.47   15.10
  -9   5   0  306.87   21.40
  -9   5   0  288.47   19.70
  -9   5   0  276.67   20.20
  -9   5   0  308.57   16.40
  -9   5   0  310.57   26.50
  -9   5   0  290.57   16.50
  -9   5   0  299.77   18.10
 -10  -5   0  190.68   11.80
 -10  -5   0  174.18   11.70
 -10  -5   0  186.38   11.60
 -10  -5   0  191.38   11.10
 -10  -5   0  174.08   11.90
 -10  -5   0  189.18   11.50
 -10  -5   0  191.38   10.20
 -10  -5   0  177.48   13.70
 -10   5   0  172.48   14.50
 -10   5   0  156.18   20.30
 -10   5   0  183.88   12.50
 -10   5   0  221.68   18.60
 -10   5   0  210.88   15.10
 -10   5   0  211.58   13.20
 -10   5   0  187.78   15.20
 -10   5   0  225.18   18.60
 -10   5   0  180.58   14.60
 -11  -5   0   30.50    3.70
 -11  -5   0   36.40    3.70
 -11  -5   0   33.00    3.40
 -11  -5   0   24.20    3.30
 -11  -5   0   26.20    4.20
 -11   5   0   28.90    7.60
   0  -6   0  643.14   38.10
   0  -6   0  711.33   54.69
   0   6   0  648.24   75.59
   0   6   0  590.14   70.79
   0   6   0  684.43   59.49
  -1  -6   0 2059.19   86.49
  -1  -6   0 1872.71   99.99
   1  -6   0 2085.69  111.49
   1  -6   0 1890.41   81.89
   1   6   0 1526.25  149.29
  -1   6   0 2008.90  136.39
   1   6   0 1784.42  142.39
   1   6   0 1773.32  111.89
  -1   6   0 2029.70  102.69
   2  -6   0 1318.37   62.49
   2  -6   0 1371.56   90.99
  -2  -6   0 1323.57   57.39
  -2  -6   0 1414.76   80.19
   2   6   0 1151.38  143.39
   2   6   0 1344.37  129.19
   2   6   0 1481.25   95.79
  -3  -6   0  356.56   22.50
   3  -6   0  358.96   25.30
  -3  -6   0  348.07   34.20
   3  -6   0  420.96   46.70
  -3  -6   0  370.46   18.70
   3   6   0  381.26   45.90
   3   6   0  312.07   64.69
   3   6   0  324.57   76.19
  -4  -6   0 2416.36  112.49
   4  -6   0 2357.66   98.09
   4  -6   0 2364.56  139.19
  -4  -6   0 2416.36   91.59
   4   6   0 2313.17  136.09
   4   6   0 1830.42  226.68
   4   6   0 2130.09  195.18
  -5  -6   0  906.71   43.00
  -5  -6   0  863.81   34.90
  -5  -6   0  944.01   39.30
  -5  -6   0  940.51   36.60
   5  -6   0  806.52   79.29
  -5   6   0  851.01   38.40
  -5   6   0  874.41   37.00
  -5   6   0  951.50   41.80
  -5   6   0  905.61   41.30
  -5   6   0  908.31   41.40
  -5   6   0  885.21   41.90
   5   6   0  904.41   78.79
  -5   6   0  934.21   47.30
  -5   6   0  905.81   41.40
  -5   6   0  959.50   41.40
   5   6   0  677.13  150.88
  -5   6   0  940.21   44.20
   5   6   0  897.21  124.49
  -6  -6   0   89.89    8.80
  -6  -6   0   92.39    7.70
  -6  -6   0   88.49    6.70
  -6  -6   0   69.19    9.50
   6  -6   0  109.99   34.90
  -6  -6   0   83.19    7.50
  -6  -6   0   83.79    6.80
  -6  -6   0   93.99    7.60
  -6  -6   0   87.59    7.10
  -6  -6   0  100.99   10.80
  -6   6   0   82.29   10.20
   6   6   0   68.59   17.60
  -6   6   0   81.09    6.60
   6   6   0   94.49   40.00
  -6   6   0   85.29   11.50
  -6   6   0   81.39    9.40
   6   6   0  228.88   68.69
   6   6   0   26.30   58.49
  -6   6   0   83.59    7.70
  -6   6   0  104.19   13.60
  -6   6   0   96.69   13.00
  -6   6   0   88.89   10.30
  -6   6   0   81.89    9.80
  -6   6   0   86.29   12.80
  -6   6   0   82.39   11.00
  -6   6   0   73.79   11.00
  -6   6   0   75.69    7.50
  -6   6   0   91.79   10.10
  -6   6   0   95.29    8.80
  -6   6   0   90.39   10.20
  -6   6   0   91.59    8.70
  -7  -6   0  449.16   21.80
  -7  -6   0  430.56   21.60
  -7  -6   0  418.46   20.40
   7  -6   0  471.25   64.29
  -7  -6   0  447.96   24.50
  -7  -6   0  441.06   22.80
  -7  -6   0  447.36   21.60
  -7  -6   0  432.06   20.70
  -7  -6   0  422.16   20.30
  -7   6   0  418.46   26.20
   7   6   0  409.96   43.00
  -7   6   0  438.46   28.00
  -7   6   0  437.26   22.90
  -7   6   0  422.66   25.80
  -7   6   0  424.06   26.20
  -7   6   0  450.35   26.90
  -7   6   0  368.16   25.30
  -7   6   0  446.16   26.60
  -7   6   0  445.06   27.40
  -7   6   0  441.26   21.90
  -7   6   0  439.56   22.50
  -7   6   0  450.15   32.10
  -7   6   0  408.66   21.30
  -7   6   0  442.06   19.70
   7   6   0  514.75  186.18
  -7   6   0  425.96   26.50
  -7   6   0  439.26   24.50
  -7   6   0  448.26   26.20
  -8  -6   0  237.38   16.70
  -8  -6   0  243.08   14.70
  -8  -6   0  228.58   14.00
  -8  -6   0  211.58   12.80
  -8  -6   0  232.48   13.50
  -8  -6   0  248.98   14.80
  -8  -6   0  232.38   13.40
  -8  -6   0  234.78   14.40
  -8  -6   0  237.98   15.50
  -8   6   0  229.88   15.20
  -8   6   0  229.28   19.10
  -8   6   0  249.38   14.60
   8   6   0  206.38   25.10
  -8   6   0  223.38   18.30
  -8   6   0  235.58   12.90
  -8   6   0  264.57   20.20
  -8   6   0  181.08   17.10
  -8   6   0  252.37   23.10
  -8   6   0  219.38   17.90
  -8   6   0  231.48   14.10
  -8   6   0  260.47   20.10
  -8   6   0  234.38   18.10
  -8   6   0  238.88   18.20
  -8   6   0  234.88   14.00
  -8   6   0  247.98   18.30
  -9  -6   0  534.25   23.50
  -9  -6   0  532.55   25.00
  -9  -6   0  527.45   23.90
  -9  -6   0  488.35   27.00
  -9  -6   0  490.95   25.10
  -9  -6   0  524.25   24.80
  -9  -6   0  517.45   24.60
  -9  -6   0  518.75   22.60
  -9   6   0  513.15   27.30
  -9   6   0  515.95   23.90
  -9   6   0  539.55   24.10
  -9   6   0  540.65   30.00
  -9   6   0  516.55   35.60
  -9   6   0  537.25   25.70
  -9   6   0  484.05   29.20
  -9   6   0  534.45   29.30
  -9   6   0  529.95   28.90
  -9   6   0  544.55   29.00
  -9   6   0  527.35   30.40
 -10  -6   0  170.48   12.80
 -10  -6   0  189.48   11.60
 -10  -6   0  192.88   10.80
 -10  -6   0  182.68   10.90
 -10  -6   0  179.58   10.10
 -10  -6   0  172.98   10.90
 -10   6   0  136.29   17.50
 -10   6   0  172.58   14.20
 -10   6   0  211.18   17.10
 -10   6   0  213.28   16.70
 -10   6   0  174.68   14.90
 -10   6   0  175.98   11.40
 -10   6   0  164.58   10.60
 -11  -6   0   24.50    2.60
 -11  -6   0   26.20    2.90
 -11  -6   0   23.40    3.70
 -11  -6   0   20.60    2.80
   0  -7   0   -3.50    2.60
   0  -7   0    0.20    1.60
   0  -7   0   -3.30    5.50
   0   7   0    9.00   17.00
   0   7   0   -7.70   14.90
  -1  -7   0 1406.36   61.49
   1  -7   0 1244.58   56.39
  -1  -7   0 1294.67   83.29
  -1  -7   0 1191.98   56.09
   1  -7   0 1277.97   63.39
   1  -7   0 1270.97   89.29
   1   7   0 1302.77  127.69
  -1   7   0 1474.15   79.79
  -1   7   0 1293.17  115.39
   1   7   0 1268.27   95.09
   1   7   0 1028.70  128.69
  -2  -7   0  843.92   42.10
  -2  -7   0  847.12   36.20
  -2  -7   0  799.02   62.09
   2  -7   0  872.81   46.90
   2  -7   0  798.22   72.39
   2   7   0  992.40  127.89
   2   7   0  954.30   81.19
   2   7   0  730.93  120.19
  -3  -7   0 2008.80  108.29
  -3  -7   0 2106.59   77.29
   3  -7   0 2045.00   88.79
  -3  -7   0 2121.39   84.39
   3  -7   0 1972.40  129.09
   3   7   0 2103.99  183.18
   3   7   0 2066.19  133.59
   3   7   0 1776.12  205.98
   4  -7   0   36.80   13.30
  -4  -7   0   41.00    7.10
  -4  -7   0   39.70    9.30
  -4   7   0   40.50    7.70
   4   7   0   51.09   15.70
   4   7   0   29.60   47.10
  -4   7   0   35.10    7.90
  -4   7   0   46.20    6.70
  -4   7   0   36.30    5.60
  -4   7   0   44.80    6.20
   4   7   0  104.89   49.10
  -4   7   0   44.00    6.70
  -4   7   0   37.30    9.40
  -4   7   0   42.80   10.30
   4   7   0   14.30   17.90
   5  -7   0  110.99   32.60
  -5  -7   0  137.69    9.40
  -5  -7   0  137.39    9.60
  -5  -7   0  125.89    8.30
  -5  -7   0  123.59   13.30
  -5  -7   0  142.99   11.00
  -5  -7   0  130.99    9.00
  -5   7   0  149.79   14.10
  -5   7   0  149.79   15.90
   5   7   0  161.98   46.60
  -5   7   0  137.09   10.10
  -5   7   0  139.29   12.70
   5   7   0  246.08   82.19
  -5   7   0  141.49   12.70
  -5   7   0  150.68   12.20
   5   7   0   44.60   61.39
  -5   7   0  130.69   12.90
  -5   7   0  136.19   11.30
  -5   7   0  126.69   12.50
  -5   7   0  143.29   16.00
  -5   7   0  131.49    9.80
   5   7   0  154.98   26.00
  -6  -7   0  573.44   32.30
  -6  -7   0  531.35   24.70
  -6  -7   0  588.94   29.00
  -6  -7   0  600.94   26.40
   6  -7   0  703.13   74.49
  -6  -7   0  576.34   25.10
  -6  -7   0  568.74   26.20
  -6  -7   0  569.54   25.00
  -6  -7   0  581.34   26.30
  -6   7   0  599.54   35.00
  -6   7   0  563.74   31.70
  -6   7   0  577.24   28.20
   6   7   0  614.84  185.88
  -6   7   0  555.74   26.60
  -6   7   0  589.84   37.70
  -6   7   0  556.94   32.30
  -6   7   0  582.64   30.80
  -6   7   0  604.84   30.60
  -6   7   0  540.85   26.10
  -6   7   0  603.04   32.30
  -6   7   0  599.54   32.10
  -6   7   0  611.84   27.70
   6   7   0  501.95   43.90
  -7  -7   0  496.05   23.70
  -7  -7   0  510.85   24.00
  -7  -7   0  476.95   22.70
  -7  -7   0  449.76   25.50
  -7  -7   0  489.35   22.40
  -7  -7   0  487.85   24.90
  -7  -7   0  505.95   24.10
  -7  -7   0  487.75   26.40
  -7  -7   0  501.65   22.60
  -7   7   0  514.05   24.90
  -7   7   0  504.25   24.30
  -7   7   0  508.95   28.70
  -7   7   0  488.85   24.50
  -7   7   0  538.65   28.60
  -7   7   0  494.55   31.90
  -7   7   0  496.35   30.00
  -7   7   0  489.65   29.60
  -7   7   0  469.15   28.60
   7   7   0  469.45   40.60
  -7   7   0  552.14   35.80
  -7   7   0  486.85   23.60
  -7   7   0  545.65   30.10
  -8  -7   0  138.09    9.30
  -8  -7   0  137.99   10.90
  -8  -7   0  131.89    9.40
  -8  -7   0  140.39    8.90
  -8  -7   0  130.69   10.50
  -8  -7   0  142.89   12.10
  -8  -7   0  128.09   10.00
  -8   7   0  134.59    9.50
  -8   7   0  164.68   18.20
  -8   7   0  114.59   15.70
  -8   7   0  161.18   16.50
  -8   7   0  136.59   13.60
  -8   7   0  135.09    9.90
  -8   7   0  139.19   10.20
  -8   7   0  148.09   13.80
  -8   7   0  175.48   15.70
  -8   7   0  136.29   16.00
  -8   7   0  125.69   10.60
   8   7   0  148.39   20.10
  -8   7   0  142.59   14.20
  -9  -7   0   43.20    6.00
  -9  -7   0   45.80    5.20
  -9  -7   0   41.20    4.60
  -9  -7   0   41.20    4.50
  -9  -7   0   39.90    5.10
  -9  -7   0   42.70    5.30
  -9   7   0   46.20    9.20
  -9   7   0   32.10    7.00
  -9   7   0   78.19   13.80
  -9   7   0   33.50    8.80
  -9   7   0   38.50    8.60
   9   7   0   23.50    9.40
  -9   7   0   39.30    4.60
  -9   7   0   39.50   10.20
 -10  -7   0   24.80    4.10
 -10  -7   0   26.30    3.20
 -10  -7   0   26.50    3.20
 -10  -7   0   24.10    3.10
 -10  -7   0   28.20    3.80
 -10  -7   0   24.10    3.30
 -10   7   0   25.10    7.50
 -10   7   0   24.50    4.40
 -10   7   0   39.50    8.80
 -10   7   0   13.60    8.60
 -11  -7   0   64.39    4.70
   0  -8   0   95.89   12.30
   0  -8   0   99.29    9.50
   0  -8   0  148.79   25.50
   0   8   0  140.09   47.70
   0   8   0   93.39   43.60
  -1  -8   0  122.59   13.60
   1  -8   0  118.69   13.30
   1  -8   0  139.79   25.90
   1  -8   0  131.49   11.00
  -1  -8   0  157.48   36.20
  -1  -8   0  102.59    9.60
   1   8   0   79.69   35.40
  -1   8   0   96.29   42.80
   1   8   0  118.39   56.59
   2  -8   0  595.04   34.10
  -2  -8   0  622.54   29.00
  -2  -8   0  601.74   35.10
   2  -8   0  549.95   61.59
  -2  -8   0  649.64   58.19
   2   8   0  615.74   55.09
   2   8   0  619.94   99.39
   2   8   0  569.44   66.69
   2   8   0  579.84  147.09
  -3  -8   0  673.43   37.90
  -3  -8   0  689.53   58.49
  -3  -8   0  682.63   34.20
   3  -8   0  695.23   70.79
   3  -8   0  651.13   41.10
  -3  -8   0  628.64   30.30
   3   8   0  608.34   71.39
   3   8   0  667.63  130.99
  -3   8   0  662.63   35.30
   3   8   0  636.34   62.79
   3   8   0  565.14  106.19
  -3   8   0  653.23   35.70
  -3   8   0  699.13   37.50
  -3   8   0  654.03   32.80
  -3   8   0  681.13   29.50
  -3   8   0  719.03   34.00
  -4  -8   0  122.09    9.50
  -4  -8   0  115.99   18.60
   4  -8   0  141.89   41.10
  -4  -8   0  121.29   28.80
  -4  -8   0  119.29   13.40
   4   8   0  113.99   21.00
  -4   8   0   96.19    8.50
  -4   8   0  100.99    8.60
  -4   8   0  128.89   15.10
   4   8   0   87.79   60.89
  -4   8   0   97.79   22.10
   4   8   0   49.80   81.79
  -4   8   0  119.49   13.70
  -4   8   0  114.89   12.90
  -4   8   0  116.79   11.80
  -4   8   0  100.39    9.50
   4   8   0  166.88   19.20
  -4   8   0  126.49   11.50
  -4   8   0   93.89   12.10
  -5  -8   0  296.17   17.70
   5  -8   0  274.47   45.20
  -5  -8   0  281.17   22.00
  -5  -8   0  308.47   15.30
  -5  -8   0  300.47   14.90
  -5   8   0  305.47   19.50
   5   8   0  316.47   32.20
  -5   8   0  280.77   16.20
  -5   8   0  299.97   18.50
   5   8   0  285.07  116.19
  -5   8   0  286.47   16.70
  -5   8   0  275.27   21.40
  -5   8   0  301.27   20.70
  -5   8   0  331.37   21.70
   5   8   0  360.66   59.79
  -5   8   0  306.87   24.60
  -5   8   0  323.17   23.60
  -6  -8   0  311.77   16.30
  -6  -8   0  340.27   17.80
  -6  -8   0  327.37   16.30
   6  -8   0  380.76   55.39
  -6  -8   0  340.87   23.80
  -6  -8   0  341.47   19.80
  -6  -8   0  334.47   17.60
  -6  -8   0  335.07   16.60
  -6   8   0  359.66   21.90
  -6   8   0  361.86   23.90
  -6   8   0  317.37   17.50
  -6   8   0  340.27   24.30
   6   8   0  261.07  109.59
  -6   8   0  353.26   19.70
  -6   8   0  358.76   25.80
  -6   8   0  338.07   27.00
  -6   8   0  320.77   22.20
   6   8   0  275.37   32.20
  -6   8   0  309.27   17.80
  -7  -8   0    3.20    1.90
  -7  -8   0    1.10    2.00
  -7  -8   0    4.70    2.10
  -7  -8   0    1.90    2.70
  -7  -8   0   -3.00    4.80
  -7  -8   0    1.00    1.30
  -7  -8   0    1.80    1.40
  -7   8   0   19.00    9.20
  -7   8   0    4.70    4.10
  -7   8   0    0.90    2.50
  -7   8   0    3.20    1.80
  -7   8   0   21.40    9.50
  -7   8   0    2.90    2.60
  -7   8   0    0.80    1.70
  -7   8   0    6.00    3.60
  -8  -8   0    1.10    1.30
  -8  -8   0    3.00    2.40
  -8  -8   0   -1.30    1.30
  -8  -8   0    0.70    1.20
  -8  -8   0    0.00    1.30
  -8  -8   0    0.20    0.90
  -8   8   0   12.00    9.10
  -8   8   0    7.60    9.10
  -8   8   0    2.10    1.60
  -8   8   0    6.40    4.70
  -8   8   0    6.10    4.40
   8   8   0    3.10    6.30
  -8   8   0    0.40    1.70
  -8   8   0   -2.10    2.20
  -8   8   0    0.90    2.20
  -8   8   0    5.30    5.70
  -9  -8   0  182.08   11.30
  -9  -8   0  175.38   11.30
  -9  -8   0  192.48   10.00
  -9  -8   0  191.28   12.80
  -9  -8   0  191.18   10.40
  -9   8   0  197.28   10.70
   9   8   0  183.48   17.40
  -9   8   0  162.58   18.10
  -9   8   0  166.98   19.40
  -9   8   0  164.08   13.10
  -9   8   0  229.68   18.00
  -9   8   0  186.38   10.80
  -9   8   0  156.18   17.40
 -10  -8   0   21.00    2.30
 -10  -8   0   17.40    2.70
 -10  -8   0   19.40    3.10
 -10   8   0   23.10    8.60
 -10   8   0   19.20    6.40
 -10   8   0   22.10    8.70
 -10   8   0   18.80    3.60
   0  -9   0   -1.60    1.50
   0  -9   0  -10.20    8.20
   0   9   0   -4.10   23.20
   0   9   0    6.50    4.60
   1  -9   0  214.78   15.40
  -1  -9   0  188.78   13.90
   1  -9   0  194.78   19.10
  -1  -9   0  234.18   37.40
  -1  -9   0  202.38   14.60
  -1  -9   0  211.08   19.10
   1  -9   0  192.88   33.80
   1   9   0  169.48   24.30
  -1   9   0  235.38   18.30
  -1   9   0  191.68   19.00
   1   9   0  341.27   70.59
   1   9   0  243.58   74.09
  -2  -9   0  525.35   26.60
  -2  -9   0  512.25   25.90
  -2  -9   0  490.05   32.50
   2  -9   0  496.05   60.59
   2  -9   0  509.65   27.60
   2  -9   0  501.15   32.30
  -2  -9   0  497.75   54.89
   2  -9   0  498.15   25.30
  -2   9   0  535.75   31.40
   2   9   0  475.95   39.20
   2   9   0  586.44   94.39
  -2   9   0  527.05   28.80
   2   9   0  537.95   35.90
   2   9   0  336.87  118.39
  -2   9   0  496.25   25.40
  -2   9   0  539.65   32.40
  -3  -9   0  125.09   11.10
  -3  -9   0  144.09   11.80
  -3  -9   0  188.08   33.50
   3  -9   0  137.79   12.50
   3  -9   0  125.39   11.10
   3  -9   0  182.98   48.80
  -3  -9   0  137.89   15.50
  -3   9   0  126.99   10.10
   3   9   0  110.49   18.30
  -3   9   0  147.29   15.10
   3   9   0  169.88   23.80
   3   9   0   67.69   65.39
  -3   9   0  116.49   15.90
  -3   9   0  125.69   12.60
  -3   9   0  147.09   14.90
  -3   9   0  136.49   12.70
  -3   9   0  138.69   10.20
  -4  -9   0   10.70    4.10
   4  -9   0   14.80   15.90
   4  -9   0   13.40    4.70
  -4  -9   0   12.20    4.20
  -4   9   0   17.30    5.60
   4   9   0   -4.30    8.40
  -4   9   0   10.70    3.40
  -4   9   0   12.70    4.40
   4   9   0  -55.29   65.29
  -4   9   0   10.00    5.10
  -4   9   0   14.10    3.90
  -4   9   0   -2.30    5.30
  -4   9   0   20.60    5.80
  -4   9   0   17.80    4.80
  -4   9   0   14.30    8.90
   4   9   0   19.70    9.50
  -5  -9   0   59.49    9.90
  -5  -9   0   62.89    7.10
   5  -9   0  113.19   34.20
  -5  -9   0   62.09    5.50
   5   9   0   45.30   14.00
   5   9   0  140.79   79.19
  -5   9   0   51.49   10.20
  -5   9   0   55.29    6.40
  -5   9   0   72.49   15.10
  -5   9   0   41.00   11.80
  -5   9   0   63.19    9.60
  -5   9   0   62.39    6.70
  -5   9   0   71.79    8.40
  -5   9   0   55.49    8.40
  -5   9   0   62.29    8.00
  -6  -9   0  143.99   14.50
  -6  -9   0  127.19   10.40
  -6  -9   0  132.59    9.60
   6  -9   0  123.89   11.40
  -6  -9   0  124.09    9.30
  -6  -9   0  126.59    8.60
  -6   9   0  105.99   16.40
  -6   9   0  113.39   14.90
  -6   9   0  137.99   14.40
  -6   9   0  140.99   19.10
  -6   9   0  135.89    9.90
  -6   9   0  128.79   13.00
  -6   9   0  119.59    9.20
  -6   9   0  133.99   12.20
   6   9   0  113.09   22.70
  -6   9   0  124.39   10.40
  -7  -9   0   34.70    4.90
  -7  -9   0   27.70    3.70
  -7  -9   0   30.90    4.70
   7  -9   0   40.00    7.00
  -7  -9   0   31.50    4.40
  -7  -9   0   18.20    7.10
  -7  -9   0   34.80    4.30
  -7  -9   0   28.00    4.10
  -7   9   0   45.50   12.10
  -7   9   0   24.80    4.20
  -7   9   0   28.30    5.10
  -7   9   0   21.20    4.00
  -7   9   0   27.90    7.00
  -7   9   0   23.90    7.30
  -7   9   0   30.70    8.20
  -7   9   0   27.70   10.10
   7   9   0   29.60   10.70
  -7   9   0   27.80    6.30
  -8  -9   0  181.58   11.90
  -8  -9   0  188.08   10.50
  -8  -9   0  177.98   12.30
  -8  -9   0  198.08   10.30
  -8  -9   0  195.78   11.60
  -8  -9   0  200.08   11.70
  -8   9   0  206.48   17.70
  -8   9   0  180.38   10.30
  -8   9   0  171.08   14.00
  -8   9   0  213.28   16.80
  -8   9   0  201.78   18.40
  -8   9   0  193.98   11.40
   8   9   0  204.48   21.30
  -8   9   0  183.48   10.50
  -9  -9   0   86.69    6.40
  -9  -9   0   98.39    7.60
  -9  -9   0   89.99    7.20
  -9  -9   0   97.59    6.60
  -9   9   0  107.29   12.40
   9   9   0   81.79   10.90
  -9   9   0   87.49    6.10
  -9   9   0  114.79   12.60
  -9   9   0   98.89    8.70
  -9   9   0   74.39   10.60
 -10  -9   0   43.50    3.60
 -10  -9   0   50.49    3.90
   0 -10   0   55.29    9.20
   0 -10   0   44.20   19.50
   0 -10   0   46.40    7.40
   0 -10   0   43.00    9.70
   0  10   0   71.29    9.60
   0  10   0   56.29   15.10
   0  10   0   62.09   12.80
  -1 -10   0 1537.25  112.09
  -1 -10   0 1534.95   61.99
   1 -10   0 1467.45  114.29
   1 -10   0 1580.34   71.39
  -1 -10   0 1504.35   61.09
   1 -10   0 1464.25   60.59
   1 -10   0 1558.24   63.19
   1  10   0 1526.65   73.79
   1  10   0 1477.55   78.99
  -1  10   0 1315.67   62.69
  -1  10   0 1547.25   71.99
  -1  10   0 1606.74   67.79
  -1  10   0 1388.76   74.49
   2 -10   0  381.06   52.89
   2 -10   0  315.47   19.20
  -2 -10   0  305.67   19.30
  -2 -10   0  305.77   48.10
  -2 -10   0  306.37   19.80
   2 -10   0  333.67   20.80
   2 -10   0  322.77   24.60
  -2 -10   0  325.57   26.00
  -2  10   0  327.57   25.90
  -2  10   0  350.36   24.60
   2  10   0  341.17   28.90
  -2  10   0  304.87   17.90
   2  10   0  295.37   31.40
  -2  10   0  333.97   17.90
  -2  10   0  258.07   21.10
  -2  10   0  347.97   21.70
  -3 -10   0  152.18   16.80
   3 -10   0  151.78   13.20
  -3 -10   0  154.68   12.40
  -3 -10   0  152.88   12.60
  -3 -10   0  142.29   39.60
   3 -10   0  201.18   46.70
   3  10   0  163.38   33.90
   3  10   0  129.59   23.10
  -3  10   0  140.49   15.00
   3  10   0  156.18  109.79
  -3  10   0  147.09   15.80
  -3  10   0  156.68   13.70
  -3  10   0  152.28   11.30
  -3  10   0  153.98   16.20
  -4 -10   0  314.17   18.80
  -4 -10   0  325.27   15.60
   4 -10   0  351.76   59.79
  -4 -10   0  354.96   26.60
   4 -10   0  306.67   18.90
   4 -10   0  303.57   20.20
  -4  10   0  318.97   17.50
   4  10   0  352.96   34.10
   4  10   0  567.74  150.18
  -4  10   0  319.97   22.60
  -4  10   0  306.77   23.00
  -4  10   0  330.87   25.40
  -4  10   0  324.37   19.60
  -4  10   0  308.17   17.70
  -4  10   0  335.27   22.30
   4  10   0  352.16   30.80
  -5 -10   0   74.29    5.90
  -5 -10   0   65.79   10.10
   5 -10   0   73.39    8.30
   5 -10   0   67.29    7.60
   5  10   0   65.99   11.70
  -5  10   0   67.39    9.30
  -5  10   0   71.89    8.10
  -5  10   0   71.69    7.10
  -5  10   0   76.49    6.80
   5  10   0   68.99   17.80
  -5  10   0   73.09   11.20
  -5  10   0   55.19    8.40
  -5  10   0   77.99   11.50
  -6 -10   0   17.90    2.80
   6 -10   0   21.70    5.70
  -6 -10   0   15.80    3.40
  -6 -10   0   15.40    5.20
  -6 -10   0   23.00    3.80
  -6 -10   0   13.70    3.20
  -6  10   0   16.00    4.10
   6  10   0   10.20    8.80
  -6  10   0   14.60    5.20
  -6  10   0   22.00    6.70
  -6  10   0   12.30    3.10
  -6  10   0   15.90    3.90
  -6  10   0   15.30    6.70
  -6  10   0   15.60    7.90
  -7 -10   0  125.79    9.60
  -7 -10   0  140.09   10.00
  -7 -10   0  133.39    9.10
  -7 -10   0  134.09    9.30
  -7 -10   0  131.89    8.30
   7 -10   0  181.98   15.70
  -7  10   0  133.39    9.20
  -7  10   0  140.89   15.10
  -7  10   0  158.88   16.10
  -7  10   0  131.89    8.30
  -7  10   0  131.49   13.70
   7  10   0  153.48   18.90
  -7  10   0  118.89    9.20
  -7  10   0  126.89   12.10
  -8 -10   0    3.60    2.10
  -8 -10   0   10.80    2.20
  -8 -10   0    6.80    2.10
  -8 -10   0    5.30    2.00
  -8 -10   0    4.70    1.60
  -8  10   0    7.80    3.10
  -8  10   0    7.20    7.10
   8  10   0   -0.60    4.00
  -8  10   0    8.10    4.50
  -8  10   0    4.60    1.80
  -8  10   0   23.50    8.50
  -9 -10   0  144.79    8.00
  -9 -10   0  147.09    8.30
  -9  10   0  152.18   10.70
  -9  10   0  180.68    8.00
  -9  10   0  186.68   13.50
  -9  10   0  124.29   12.20
   0 -11   0    3.20   13.70
   0 -11   0   -0.90    2.10
   0 -11   0    0.80    2.00
   0 -11   0   -2.40    2.70
   0  11   0   -8.20    4.50
   0  11   0   -8.20    9.10
   0  11   0   -3.10    2.90
   1 -11   0  598.14   36.80
  -1 -11   0  558.74   28.90
  -1 -11   0  610.94   30.50
   1 -11   0  614.64   29.70
   1 -11   0  538.35   29.70
  -1 -11   0  561.74   62.89
   1 -11   0  521.35   67.09
  -1 -11   0  542.55   36.40
  -1  11   0  602.84   34.10
   1  11   0  481.15   29.90
  -1  11   0  549.25   37.30
  -1  11   0  581.24   30.60
   1  11   0  582.74   39.60
  -1  11   0  526.65   26.40
   1  11   0  526.85   40.90
  -2 -11   0  251.37   22.70
   2 -11   0  222.28   16.70
  -2 -11   0  222.98   16.40
   2 -11   0  215.88   16.00
  -2 -11   0  217.48   15.60
  -2 -11   0  146.19   48.00
   2 -11   0  241.18   22.50
  -2  11   0  242.28   20.00
  -2  11   0  232.78   17.30
  -2  11   0  254.77   22.30
  -2  11   0  233.98   14.60
   2  11   0  245.08   25.20
   2  11   0  213.88   26.40
  -2  11   0  221.38   14.20
  -2  11   0  174.98   17.30
  -3 -11   0  459.55   32.30
   3 -11   0  473.35   24.60
  -3 -11   0  433.76   24.80
  -3 -11   0  447.46   24.10
   3 -11   0  420.56   25.40
   3  11   0  429.66   38.60
  -3  11   0  443.06   21.70
  -3  11   0  418.06   27.20
  -3  11   0  454.75   22.90
  -3  11   0  478.75   27.20
   3  11   0  483.65   35.40
  -3  11   0  446.36   29.90
  -3  11   0  483.95   30.50
  -4 -11   0   40.40    4.10
   4 -11   0   31.40    6.80
  -4 -11   0   33.10   11.50
  -4  11   0   33.50    9.70
   4  11   0   31.50   11.10
  -4  11   0   32.20    9.00
  -4  11   0   34.90    7.00
  -4  11   0   23.80    6.20
  -4  11   0   31.00    5.40
  -4  11   0   30.90    5.20
   4  11   0   41.10   15.70
  -5 -11   0   70.49    6.20
  -5 -11   0   71.79    6.50
   5 -11   0   98.99   11.40
  -5 -11   0   72.09    5.60
  -5 -11   0   77.59   10.70
   5 -11   0   65.99    8.10
  -5  11   0   74.49    7.10
  -5  11   0   70.49    7.50
  -5  11   0   66.09    9.00
  -5  11   0   67.69    6.20
  -5  11   0   68.69   13.30
  -5  11   0   60.29   10.20
   5  11   0   32.50   11.60
   5  11   0   66.19   13.60
   6 -11   0  140.19   10.80
  -6 -11   0  146.89   14.10
  -6 -11   0  161.08    9.80
  -6 -11   0  157.68    9.00
  -6 -11   0  159.78   10.10
  -6  11   0  154.18   10.30
  -6  11   0  161.78   13.80
  -6  11   0  186.28   17.80
  -6  11   0  150.68   15.20
  -6  11   0  162.28   10.80
   6  11   0  160.08   20.90
  -6  11   0  160.08    9.30
  -7 -11   0  128.29    8.00
  -7 -11   0  117.39    7.90
  -7 -11   0  112.69    8.20
  -7 -11   0  118.69    6.80
  -7  11   0   92.59    8.30
  -7  11   0  119.59   10.50
   7  11   0  127.59   15.80
  -7  11   0  124.99    8.00
  -7  11   0  147.39   15.30
  -7  11   0  115.59   12.30
  -8 -11   0  146.59    8.80
  -8 -11   0  135.59    8.10
  -8 -11   0  160.08    8.30
  -8  11   0  159.28   13.20
  -8  11   0  120.39    7.90
  -8  11   0  177.28   14.50
   0 -12   0  645.04   31.10
   0 -12   0  660.63   32.20
   0 -12   0  626.34   42.20
   0  12   0  508.95   31.10
   0  12   0  587.94   28.00
   0  12   0  613.64   31.10
   0  12   0  647.34   41.00
   1 -12   0  565.54   29.50
   1 -12   0  595.54   38.30
  -1 -12   0  585.34   29.60
  -1 -12   0  561.84   30.20
  -1 -12   0  564.74   40.50
   1 -12   0  602.84   30.60
   1  12   0  577.64   29.30
  -1  12   0  595.34   38.20
  -1  12   0  604.64   34.20
  -1  12   0  586.24   27.60
   1  12   0  598.44   40.00
  -1  12   0  606.34   30.80
   1  12   0  558.74   39.30
  -2 -12   0    7.20    4.40
   2 -12   0   10.30    4.20
  -2 -12   0   12.30    4.30
  -2 -12   0   16.30    4.80
   2 -12   0   15.30    4.80
  -2  12   0   16.20    3.60
  -2  12   0   10.80    4.00
  -2  12   0   13.30    5.90
   2  12   0   13.60    6.10
   2  12   0   18.30    4.90
  -2  12   0   15.40    5.00
  -2  12   0   21.10    4.80
  -3 -12   0  228.38   14.70
   3 -12   0  206.28   14.60
  -3 -12   0  226.48   20.60
  -3 -12   0  231.98   11.20
   3 -12   0  207.08   15.50
  -3  12   0  195.08   15.90
  -3  12   0  211.28   12.20
  -3  12   0  222.18   15.10
   3  12   0  221.18   23.10
  -3  12   0  203.98   18.80
  -3  12   0  209.38   17.90
   3  12   0  168.48   22.60
  -3  12   0  207.78   13.40
   4 -12   0  244.28   15.00
  -4 -12   0  249.68   11.50
   4 -12   0  229.38   15.50
  -4 -12   0  221.28   20.00
   4  12   0  221.88   24.90
  -4  12   0  218.38   13.40
  -4  12   0  230.28   14.90
  -4  12   0  183.68   14.50
  -4  12   0  217.78   16.80
   4  12   0  231.58   23.00
  -4  12   0  216.38   18.60
   5 -12   0    9.50    3.70
   5 -12   0    9.40    2.60
  -5 -12   0    8.40    1.80
  -5 -12   0    7.20    2.00
  -5 -12   0    7.20    2.20
  -5 -12   0   11.30    5.00
   5  12   0   -2.40    7.20
  -5  12   0    7.20    3.10
  -5  12   0    7.00    2.50
  -5  12   0   11.70    2.80
  -5  12   0   11.70    7.60
   5  12   0    1.60    5.50
  -5  12   0    8.60    4.50
  -6 -12   0   33.80    3.60
  -6 -12   0   37.50    8.10
   6 -12   0   39.20    4.70
  -6 -12   0   36.60    4.00
  -6 -12   0   35.20    3.60
   6  12   0   38.20    9.90
  -6  12   0   41.10   10.10
  -6  12   0   28.10    3.60
  -6  12   0   29.50    6.00
  -6  12   0   35.30    3.90
  -6  12   0   30.30    5.90
  -7 -12   0  118.09    6.90
  -7 -12   0   95.69    6.80
  -7 -12   0  121.79    6.80
  -7  12   0   90.89    8.20
  -7  12   0   96.99   10.50
  -7  12   0   97.29    6.30
   7  12   0   99.19   11.90
   8  12   0  133.39   12.40
   0 -13   0   -2.50    3.40
   0 -13   0    1.00    1.40
   0  13   0    3.10    1.90
   0  13   0   -0.20    1.60
   0  13   0   -2.10    2.10
   0  13   0    0.10    3.20
   1 -13   0   14.30    4.40
  -1 -13   0   22.80    6.60
  -1 -13   0   17.10    4.80
   1 -13   0   22.20    8.00
  -1 -13   0   11.90    4.10
   1 -13   0   15.00    4.80
   1  13   0   11.20    3.30
   1  13   0   16.60    3.40
   1  13   0    5.40    6.00
  -1  13   0   13.60    5.40
   1  13   0   12.20    7.80
  -1  13   0    9.40    3.00
  -1  13   0   11.50    3.90
  -1  13   0   12.10    3.80
  -2 -13   0   27.30    5.50
  -2 -13   0   25.80    7.40
   2 -13   0   34.00    6.30
  -2 -13   0   28.80    5.60
   2 -13   0   28.50    5.50
  -2  13   0   22.50    5.80
   2  13   0   13.50    6.40
  -2  13   0   22.30    4.00
  -2  13   0   26.80    6.60
  -2  13   0   27.30    5.80
   2  13   0   32.70   10.20
  -3 -13   0  132.59   14.80
   3 -13   0  130.19   10.40
  -3 -13   0  126.39    6.90
   3 -13   0  113.19    9.80
  -3  13   0  114.69   10.90
   3  13   0  114.59   15.50
  -3  13   0  117.59   12.30
  -3  13   0   93.69   13.50
  -3  13   0   99.39    9.10
   3  13   0  132.69   16.90
  -3  13   0  126.69    8.80
   4 -13   0   27.40    4.80
  -4 -13   0   26.70    6.70
   4 -13   0   26.50    5.10
  -4 -13   0   25.30    2.90
  -4 -13   0   26.20    2.70
  -4  13   0   21.60    5.30
  -4  13   0   20.50    3.70
   4  13   0   36.10   12.90
  -4  13   0   14.40    4.30
  -4  13   0   23.70    4.30
   4  13   0   24.30    6.80
   5 -13   0    4.20    1.80
  -5 -13   0    2.60    1.40
  -5 -13   0    5.20    3.50
  -5 -13   0    1.80    1.20
   5  13   0    3.20    3.30
  -5  13   0   -0.10    1.50
  -5  13   0    1.10    2.00
  -5  13   0    3.50    1.50
  -5  13   0    3.60    1.70
  -6 -13   0   22.60    2.80
  -6 -13   0   31.90    2.60
  -6 -13   0   30.30    2.90
  -6  13   0   21.40    4.10
   6  13   0   22.20    5.90
  -6  13   0   27.30    3.10
  -6  13   0   27.60    4.20
   7  13   0   24.00    6.80
  -7  13   0   36.40    3.80
   0 -14   0  557.04   26.10
   0 -14   0  544.45   33.00
   0 -14   0  523.95   25.60
   0  14   0  494.45   24.40
   0  14   0  556.74   33.60
   0  14   0  533.45   23.80
  -1 -14   0   43.60    5.20
  -1 -14   0   31.00    8.40
  -1 -14   0   32.20    8.90
   1 -14   0   20.20    8.40
  -1 -14   0   27.00    2.90
   1 -14   0   27.40    5.30
   1 -14   0   24.70    4.90
   1  14   0   33.60    8.00
  -1  14   0   21.90    7.30
  -1  14   0   34.10    4.60
   1  14   0   30.70    4.10
  -1  14   0   31.10    4.00
   2 -14   0   55.29    6.20
  -2 -14   0   50.19    3.80
   2 -14   0   49.50    5.90
   2  14   0   60.29    9.30
  -2  14   0   55.49    5.30
  -2  14   0   49.80    8.20
  -2  14   0   51.99    6.20
  -2  14   0   59.19    6.20
   2  14   0   60.79    5.60
  -3 -14   0   42.50    3.30
  -3 -14   0   44.40    7.50
   3 -14   0   45.10    5.30
   3 -14   0   48.10    5.50
  -3  14   0   29.10    5.10
  -3  14   0   47.80    5.10
  -3  14   0   33.60    5.10
   3  14   0   46.00    9.60
  -3  14   0   39.40    5.00
  -3  14   0   43.50    4.40
   3  14   0   34.80    7.50
   4 -14   0   28.10    3.50
  -4 -14   0   28.10    7.20
  -4 -14   0   40.00    3.50
  -4 -14   0   33.40    2.90
  -4  14   0   29.00    4.10
  -4  14   0   34.80    3.50
  -4  14   0   49.30    5.50
   4  14   0   34.40    8.00
  -5 -14   0   73.99    4.60
  -5 -14   0   72.49    4.90
   5  14   0   78.29    7.90
  -5  14   0   61.19    5.90
  -5  14   0   75.09    4.80
   0  15   0   -0.20    2.40
   0  15   0    0.10    1.20
   0  15   0    0.10    0.80
   1  15   0   98.49   10.70
   1  15   0  105.29    6.70
  -1  15   0  107.19    6.60
  -1  15   0  115.89   10.20
  -1  15   0   78.49    9.10
  -1  15   0  102.09    7.50
   2 -15   0   77.39    6.50
  -2  15   0  117.89    7.30
  -2  15   0  101.99    7.30
   2  15   0   92.59    6.50
  -2  15   0  117.49    7.00
   2  15   0  152.08   17.90
  -3 -15   0   49.50    3.50
   3  15   0   44.30    3.60
  -3  15   0   66.29    4.20
   3  15   0   57.99    7.40
  -3  15   0   50.69    5.30
  -3  15   0   51.49    4.30
  -4  15   0    9.30    1.40
 -12   0   1   -0.70    1.70
 -12   0   1    3.30    3.00
 -12   0   1    2.10    2.30
 -11   0   1   59.99    6.90
 -11   0   1   52.49    6.70
 -11   0   1   56.99    5.10
 -11   0   1   63.09    5.10
 -11   0   1   75.39    6.00
 -11   0   1   53.29    6.50
 -11   0   1   55.99    6.10
 -11   0   1   57.39    6.00
 -11   0   1   63.69    9.00
 -10   0   1   13.90    7.30
 -10   0   1   20.20    6.20
 -10   0   1   15.10    3.50
 -10   0   1   16.00    4.00
 -10   0   1   12.40    4.00
 -10   0   1   17.00   11.20
 -10   0   1   11.90    3.00
 -10   0   1   12.90    3.20
 -10   0   1   14.10    3.80
 -10   0   1   14.70    2.90
 -10   0   1    9.60    3.80
 -10   0   1   10.40    4.10
 -10   0   1   12.10    3.90
 -10   0   1   12.90    3.70
  -9   0   1 1790.52   71.39
  -9   0   1 1735.23   70.69
  -9   0   1 1779.62   72.49
  -9   0   1 1740.03   68.59
  -9   0   1 1714.63   66.09
  -9   0   1 1806.82   71.89
  -9   0   1 1756.92   69.89
  -9   0   1 1778.12   69.29
  -9   0   1 1799.72   74.69
  -9   0   1 1805.52   69.89
  -9   0   1 1759.12   69.69
  -9   0   1 1880.71   69.99
  -9   0   1 1877.61   66.09
  -9   0   1 1539.05   86.19
  -9   0   1 1856.11   68.69
  -9   0   1 1851.01   66.79
  -9   0   1 1698.93   66.79
  -9   0   1 1803.42   72.99
  -8   0   1  247.18   14.10
  -8   0   1  216.98   15.50
  -8   0   1  247.08   14.90
  -8   0   1  252.37   17.10
  -8   0   1  240.48   16.50
  -8   0   1  255.97   17.60
  -8   0   1  261.37   16.00
  -8   0   1  251.67   16.30
  -8   0   1  233.68   14.10
  -8   0   1  256.27   16.10
  -8   0   1  246.38   22.10
  -8   0   1  254.57   15.30
  -8   0   1  247.48   13.70
  -8   0   1  229.58   16.40
  -8   0   1  242.98   19.00
  -8   0   1  246.78   17.10
   8   0  -1  348.47  118.59
  -8   0   1  252.77   15.60
  -8   0   1  237.38   15.90
  -8   0   1  241.08   13.10
  -8   0   1  211.28   27.00
  -7   0   1  483.15   21.90
   7   0  -1  346.97  114.99
  -7   0   1  482.65   23.90
   7   0  -1  479.25   61.49
  -7   0   1  519.25   26.80
  -7   0   1  517.15   23.80
  -7   0   1  544.05   22.80
  -7   0   1  477.55   23.50
  -7   0   1  501.35   26.90
  -7   0   1  463.25   22.50
  -7   0   1  494.35   25.50
  -7   0   1  502.45   24.30
  -7   0   1  548.15   36.20
  -7   0   1  396.66   23.80
   7   0  -1  781.32  117.29
  -7   0   1  523.05   23.80
   6   0  -1  332.97   86.79
   6   0  -1  184.58   72.39
   6   0  -1  264.67   40.90
   6   0  -1  301.87   28.30
   5   0  -1  106.29   48.80
   5   0  -1  145.99   28.80
   4   0  -1  232.98   47.60
   4   0  -1  294.67   39.40
   3   0  -1 4300.47  197.08
   3   0  -1 4215.88  226.28
   1   0  -1  117.79    7.10
  -1   0   1  120.49    7.10
  -1   0   1  119.79    6.90
   1   0  -1  124.99    6.80
   0   0   1 4929.21  161.98
   0   0  -1 4567.54  160.58
   0   0   1 5039.00  177.08
   0   0  -1 4696.53  179.58
   0   0  -1 4243.98  162.38
   0   0   1 4301.57  161.08
   1   0   1 1899.51   71.69
   1   0   1 1532.85   94.29
  -1   0  -1 2013.90   76.59
  -2   0  -1 4901.11  193.08
   2   0   1 4764.62  184.48
   2   0   1 3857.71  214.88
   2   0   1 4889.51  161.18
   3   0   1   82.09   31.50
   3   0   1  108.19   20.80
   3   0   1   97.59   11.70
   4   0   1 2821.32  114.39
   4   0   1 2813.82  154.68
   5   0   1  170.48   47.50
   5   0   1  127.09   47.10
   6   0   1  574.24   68.39
  -7   0  -1  570.04   27.20
  -7   0  -1  565.44   28.50
  -7   0  -1  564.34   27.40
  -7   0  -1  527.95   24.20
  -7   0  -1  585.64   28.70
  -7   0  -1  544.25   24.00
  -7   0  -1  578.14   36.70
  -7   0  -1  553.74   26.10
  -7   0  -1  498.55   28.80
  -7   0  -1  551.24   24.60
  -7   0  -1  508.85   24.50
   7   0   1  532.45   63.19
  -7   0  -1  591.04   29.30
  -7   0  -1  567.14   26.70
  -7   0  -1  585.94   29.90
  -7   0  -1  550.24   28.20
  -7   0  -1  581.44   28.30
  -7   0  -1  530.25   26.70
   7   0   1  548.55  120.09
  -7   0  -1  575.34   25.90
  -8   0  -1  396.16   25.30
  -8   0  -1  398.46   21.90
  -8   0  -1  354.86   21.50
  -8   0  -1  374.06   21.30
  -8   0  -1  418.36   30.70
  -8   0  -1  400.06   28.60
  -8   0  -1  373.66   19.10
  -8   0  -1  395.26   24.60
  -8   0  -1  332.57   30.70
  -8   0  -1  368.76   21.50
  -8   0  -1  360.66   31.50
  -8   0  -1  383.86   30.30
  -8   0  -1  379.86   22.80
  -8   0  -1  387.86   22.40
  -8   0  -1  373.56   19.20
   8   0   1  358.16   51.99
  -8   0  -1  414.66   20.90
  -9   0  -1   14.20    4.70
  -9   0  -1    4.80    3.10
  -9   0  -1    8.20    3.00
  -9   0  -1    0.30   15.90
  -9   0  -1   11.00    3.80
  -9   0  -1   10.10    3.10
  -9   0  -1    9.60    3.30
  -9   0  -1   13.60    3.30
  -9   0  -1   11.00    4.00
  -9   0  -1    8.80    4.20
  -9   0  -1   11.00    3.80
  -9   0  -1   11.30    3.70
  -9   0  -1   11.30    5.90
  -9   0  -1    7.00    3.30
 -10   0  -1  416.26   25.50
 -10   0  -1  419.86   22.00
 -10   0  -1  373.76   24.00
 -10   0  -1  443.96   24.30
 -10   0  -1  374.86   20.70
 -10   0  -1  402.56   22.20
 -10   0  -1  407.26   22.90
 -10   0  -1  436.46   19.90
 -10   0  -1  419.16   22.70
 -10   0  -1  414.76   22.90
 -10   0  -1  399.56   20.50
 -11   0  -1  217.28   13.50
 -11   0  -1  241.38   12.90
 -11   0  -1  240.48   14.30
 -11   0  -1  232.48   15.10
 -11   0  -1  245.58   16.50
 -11   0  -1  231.88   13.80
 -11   0  -1  249.38   14.00
 -12   0  -1  177.28    9.50
 -12  -1   1    8.20    2.50
 -12  -1   1   11.00    2.70
 -12  -1   1   10.10    1.70
 -12  -1   1    9.80    2.80
 -12   1   1   20.30    4.40
 -12   1   1   16.00    3.70
 -11  -1   1   11.70    2.60
 -11  -1   1   15.00    3.70
 -11  -1   1   13.10    3.50
 -11  -1   1   12.40    3.50
 -11  -1   1    9.70    2.90
 -11  -1   1    9.40    3.80
 -11  -1   1    9.50    4.60
 -11  -1   1   12.00    2.50
 -11  -1   1   18.30    4.20
 -11   1   1    9.00    1.80
 -11   1   1    9.20    2.30
 -11   1   1   14.80    4.50
 -11   1   1    9.20    3.30
 -11   1   1   10.10    3.80
 -11   1   1   14.70    4.80
 -11   1   1   18.80    4.30
 -11   1   1    9.70    3.70
 -11   1   1   12.60    7.50
 -10  -1   1  262.27   14.70
 -10  -1   1  286.87   16.80
 -10  -1   1  267.67   16.10
 -10  -1   1  260.77   14.20
 -10  -1   1  252.77   16.00
 -10  -1   1  251.67   18.80
 -10  -1   1  265.87   14.50
 -10  -1   1  249.28   15.80
 -10  -1   1  275.37   14.00
 -10  -1   1  257.67   17.10
 -10  -1   1  256.87   18.10
 -10  -1   1  264.57   15.00
 -10  -1   1  279.47   18.70
 -10   1   1  249.18   16.30
 -10   1   1  272.67   20.00
 -10   1   1  251.07   13.80
 -10   1   1  280.17   14.20
 -10   1   1  297.97   18.70
 -10   1   1  257.77   16.40
 -10   1   1  249.88   14.00
 -10   1   1  265.77   22.60
 -10   1   1  253.57   18.20
 -10   1   1  275.27   18.90
 -10   1   1  257.27   14.00
 -10   1   1  263.17   15.70
 -10   1   1  278.57   18.40
 -10   1   1  289.37   34.50
 -10   1   1  280.97   17.00
 -10   1   1  240.28   16.00
  -9  -1   1   84.09    7.00
  -9  -1   1   81.29    8.20
  -9  -1   1   81.49    8.30
  -9  -1   1   89.89   10.30
  -9  -1   1   80.19    9.50
  -9  -1   1   79.49    8.20
  -9  -1   1   83.29    9.50
  -9  -1   1   84.09    7.30
  -9  -1   1   84.79    9.10
  -9  -1   1   83.49    8.00
  -9  -1   1   79.49    8.30
  -9  -1   1   84.59   15.70
  -9  -1   1   89.19    7.90
  -9  -1   1   90.19    7.60
  -9   1   1   90.29    7.30
  -9   1   1   86.69    8.90
  -9   1   1   74.29    8.20
  -9   1   1   84.29    8.20
  -9   1   1   85.19    9.70
  -9   1   1   79.29    6.90
  -9   1   1   81.29    7.10
  -9   1   1   83.89    9.70
  -9   1   1   89.89   15.70
  -9   1   1   93.29   10.00
  -9   1   1   88.79    9.20
  -9   1   1   96.19    9.70
  -9   1   1   94.39   11.10
  -9   1   1  100.69   23.90
  -9   1   1   83.79    8.90
  -9   1   1  104.49   15.40
  -9   1   1  103.69   11.00
  -9   1   1   78.99    8.60
  -9   1   1   74.69    7.50
  -9   1   1   96.39   10.70
  -8  -1   1   68.89   11.00
  -8  -1   1   63.29    7.40
   8  -1  -1  191.58   87.79
  -8  -1   1   77.79   25.30
  -8  -1   1   64.89    7.00
  -8  -1   1   58.29    6.70
  -8  -1   1   67.39    8.20
  -8  -1   1   65.09    6.20
  -8  -1   1   62.09    6.00
  -8  -1   1   63.89    7.80
  -8  -1   1   56.99    7.30
  -8  -1   1   57.09    6.50
  -8  -1   1   56.49    6.80
  -8  -1   1   62.99    6.70
  -8  -1   1   63.09    8.10
  -8  -1   1   68.69   10.40
  -8  -1   1   67.09    5.90
  -8  -1   1   65.79   14.00
  -8  -1   1   61.09    8.00
   8   1  -1  -16.90   80.29
  -8   1   1   72.09    8.60
  -8   1   1   75.19   18.30
  -8   1   1   71.89    8.20
  -8   1   1   69.29    7.30
  -8   1   1   68.49    6.30
  -8   1   1   62.59    7.20
  -8   1   1   58.59    7.10
  -8   1   1   58.39    9.90
  -8   1   1   68.79    8.70
  -8   1   1   62.79    8.60
  -8   1   1   64.19    7.50
  -8   1   1   53.29    8.00
  -8   1   1   61.09    7.40
  -8   1   1   55.99    5.80
  -8   1   1   78.59   11.90
  -8   1   1   53.99    6.20
  -8   1   1   61.79    7.70
  -8   1   1   56.59    6.90
  -8   1   1   67.89    7.90
  -8   1   1   67.19    5.80
  -8   1   1   63.09    9.50
  -7  -1   1  172.18   12.90
  -7  -1   1  190.28   14.30
  -7  -1   1  193.28   15.30
  -7  -1   1  196.28   13.70
  -7  -1   1  200.98   18.60
  -7  -1   1  165.98   11.20
  -7  -1   1  181.98   11.80
   7  -1  -1  235.88   56.29
   7  -1  -1  214.78   84.69
  -7  -1   1  168.98   22.80
   7  -1  -1  180.48   32.80
  -7  -1   1  182.68   13.10
  -7  -1   1  179.58   11.70
  -7  -1   1  182.28   11.90
  -7  -1   1  181.78   15.30
  -7   1   1  175.38   11.40
  -7   1   1  189.98   12.40
  -7   1   1  198.48   13.20
  -7   1   1  193.38   18.10
  -7   1   1  187.28   12.80
  -7   1   1  199.68   14.70
  -7   1   1  194.08   11.10
   7   1  -1  263.97   89.19
  -7   1   1  200.38   14.10
  -7   1   1  211.18   16.90
  -7   1   1  200.08   14.70
  -7   1   1  216.08   20.90
  -7   1   1  194.78   10.70
  -7   1   1  200.38   13.20
   7   1  -1  152.58   70.69
  -7   1   1  190.08   14.60
  -7   1   1  178.88   10.80
   7   1  -1  282.87   47.30
  -7   1   1  195.48   15.20
   6  -1  -1  303.37   83.59
   6  -1  -1  376.06   51.69
   6  -1  -1  200.58   82.79
   6  -1  -1  268.17   30.30
   6   1  -1  401.06   81.19
   6   1  -1  276.27   41.00
   6   1  -1  205.88   80.09
   5  -1  -1  110.19   33.00
   5  -1  -1   77.49   39.50
   5  -1  -1  111.59   17.00
   5   1  -1   68.59   21.00
   5   1  -1  140.89   53.89
   4  -1  -1 4487.15  256.67
   4   1  -1 4390.06  257.17
   4   1  -1 4479.45  210.08
   3   1  -1 3480.45  166.48
   3   1  -1 3637.34  208.08
   3   1  -1 3772.22  132.49
   2  -1  -1 6985.60  243.48
   2   1  -1 6334.97  297.27
   2   1  -1 6874.01  230.88
   2   1  -1 7019.80  267.47
  -1  -1   1 8404.86  279.67
  -1  -1   1 7516.95  282.07
   1   1  -1 8874.61  304.87
   0  -1   1 5905.21  224.18
   0  -1  -1 5643.94  219.38
   0  -1  -1 5899.01  206.28
   0  -1   1 5603.34  202.98
   0   1  -1 6568.84  213.88
   0   1   1 5791.22  218.58
   0   1  -1 5647.24  221.48
   1  -1   1 1281.07   66.69
   1  -1   1 1486.55   53.69
   1  -1   1 1521.45   62.99
  -1  -1  -1 1479.05   57.99
  -1  -1  -1 1423.46   59.79
  -1  -1  -1 1454.35   77.19
   1  -1   1 1420.26   59.09
   1   1   1 1388.96   72.49
  -1   1  -1 1400.76   56.99
   1   1   1 1521.75   56.69
   2  -1   1 2610.04  105.69
   2  -1   1 2644.24  109.49
  -2  -1  -1 2570.34  135.59
  -2  -1  -1 2581.04  104.59
   2   1   1 2566.24   96.29
   2   1   1 2354.16  123.79
   3  -1   1  177.78   34.90
  -3  -1  -1  227.18   39.40
   3  -1   1  229.98   27.70
   3   1   1  223.78   21.60
   3   1   1  220.18   33.50
   4  -1   1   17.70   14.60
   4  -1   1   42.80   14.00
   4  -1   1   17.30   14.80
   4   1   1   29.20   24.80
   4   1   1   33.70   22.60
   4   1   1   45.60   11.00
   5  -1   1 1396.56   70.39
   5  -1   1 1376.36   97.49
   5  -1   1 1138.19  125.69
   5   1   1 1144.99  149.09
   5   1   1 1366.46   61.69
   5   1   1 1340.07  112.59
   6  -1   1  143.79   35.10
   6  -1   1  123.29   51.19
   6  -1   1  101.69   44.70
   6   1   1  193.48   59.29
  -7  -1  -1  630.84   29.60
  -7  -1  -1  720.23   35.80
  -7  -1  -1  655.33   28.70
   7  -1   1  667.33   66.29
  -7  -1  -1  640.44   29.30
  -7  -1  -1  663.93   32.80
  -7  -1  -1  690.43   32.30
  -7  -1  -1  720.33   37.70
  -7  -1  -1  689.33   32.40
  -7  -1  -1  656.33   29.00
  -7  -1  -1  635.64   27.80
  -7  -1  -1  579.94   29.90
  -7  -1  -1  621.24   27.40
  -7  -1  -1  592.84   40.70
  -7  -1  -1  643.64   31.30
  -7  -1  -1  625.84   26.90
  -7  -1  -1  685.13   31.20
   7  -1   1  550.74  113.59
  -7  -1  -1  619.94   30.80
  -7  -1  -1  616.74   29.50
  -7   1  -1  602.54   30.40
  -7   1  -1  683.93   33.70
  -7   1  -1  656.53   32.40
  -7   1  -1  659.43   31.60
  -7   1  -1  631.44   31.60
  -7   1  -1  638.14   29.40
  -7   1  -1  661.53   27.30
  -7   1  -1  627.84   29.00
  -7   1  -1  631.24   31.10
   7   1   1  656.63  133.59
  -7   1  -1  628.84   29.70
  -7   1  -1  673.03   31.80
  -7   1  -1  645.04   28.80
  -7   1  -1  656.43   39.20
  -7   1  -1  661.53   32.40
  -7   1  -1  619.64   29.80
  -7   1  -1  642.74   27.40
  -7   1  -1  643.94   28.40
  -7   1  -1  654.73   31.00
  -8  -1  -1  220.68   17.70
   8  -1   1  254.77   44.40
  -8  -1  -1  238.38   15.00
  -8  -1  -1  237.18   14.70
  -8  -1  -1  253.27   18.90
  -8  -1  -1  235.78   16.00
  -8  -1  -1  239.48   16.90
  -8  -1  -1  217.38   13.90
  -8  -1  -1  171.28   28.90
  -8  -1  -1  253.57   18.40
  -8  -1  -1  222.28   14.00
  -8  -1  -1  230.78   13.20
  -8  -1  -1  236.38   15.30
  -8  -1  -1  244.58   17.20
  -8  -1  -1  242.48   15.80
  -8  -1  -1  252.47   20.60
  -8  -1  -1  243.98   18.10
  -8   1  -1  244.68   17.30
  -8   1  -1  251.47   13.70
  -8   1  -1  273.27   21.70
   8   1   1  122.19   41.20
  -8   1  -1  270.37   20.80
  -8   1  -1  233.48   24.80
  -8   1  -1  227.08   15.50
  -8   1  -1  203.08   22.80
  -8   1  -1  233.28   19.10
  -8   1  -1  249.48   18.30
  -8   1  -1  240.18   15.30
  -8   1  -1  254.87   17.60
  -8   1  -1  228.68   16.80
  -8   1  -1  230.98   19.00
  -8   1  -1  243.68   13.50
  -8   1  -1  249.97   16.00
  -8   1  -1  214.98   13.40
  -8   1  -1  244.08   16.20
  -9  -1  -1  125.49   11.60
  -9  -1  -1  144.49   11.90
  -9  -1  -1  131.99   10.80
  -9  -1  -1  128.39   11.90
  -9  -1  -1  132.89    9.70
  -9  -1  -1  134.09    9.80
  -9  -1  -1  134.39   10.50
  -9  -1  -1  108.79   13.60
  -9  -1  -1  137.99   11.20
  -9  -1  -1  138.69   12.10
  -9  -1  -1  142.89    9.90
  -9  -1  -1  128.59   10.60
  -9  -1  -1  131.59   13.30
  -9   1  -1  132.89   12.40
  -9   1  -1  118.09   20.90
  -9   1  -1  119.39   11.70
  -9   1  -1  133.09   11.60
  -9   1  -1  133.49   11.40
  -9   1  -1  131.19    9.20
  -9   1  -1  135.89   10.00
  -9   1  -1  135.29    9.60
  -9   1  -1  145.39   11.80
  -9   1  -1  126.69   11.20
  -9   1  -1  174.78   15.00
  -9   1  -1  134.19   12.50
  -9   1  -1  139.29   10.80
  -9   1  -1  124.69   11.60
  -9   1  -1  159.38   14.00
  -9   1  -1  139.59   12.90
  -9   1  -1  123.19   13.10
 -10  -1  -1   97.49   10.00
 -10  -1  -1  108.09    9.20
 -10  -1  -1  106.99    9.20
 -10  -1  -1  100.59    8.00
 -10  -1  -1   98.59    8.30
 -10  -1  -1  102.29    9.80
 -10  -1  -1  106.69   11.50
 -10  -1  -1   98.89    9.30
 -10  -1  -1  103.49    9.80
 -10   1  -1  105.39   10.20
 -10   1  -1   96.99    9.70
 -10   1  -1  103.39    8.70
 -10   1  -1   96.19    8.90
 -10   1  -1  107.49   10.60
 -10   1  -1  104.59    9.50
 -10   1  -1  105.59   11.60
 -10   1  -1  107.69    8.00
 -10   1  -1  103.69   13.60
 -10   1  -1  105.39    9.70
 -10   1  -1  108.59   11.60
 -11  -1  -1  120.69    8.80
 -11  -1  -1  130.79    8.00
 -11  -1  -1  128.09   11.30
 -11  -1  -1  111.69    8.70
 -11  -1  -1  119.09    8.00
 -11  -1  -1  105.49    8.50
 -11  -1  -1  114.79    9.10
 -11   1  -1  121.19    8.60
 -11   1  -1  130.49    9.70
 -11   1  -1  112.49   10.60
 -11   1  -1  130.99   10.20
 -11   1  -1  102.89    8.80
 -11   1  -1  120.89    9.40
 -11   1  -1  126.39   11.50
 -12  -2   1  362.16   15.50
 -12  -2   1  354.86   14.30
 -12  -2   1  308.37   14.50
 -11  -2   1    9.30    2.50
 -11  -2   1    6.40    2.80
 -11  -2   1   10.50    2.50
 -11  -2   1    7.50    2.60
 -11  -2   1    6.20    2.30
 -11  -2   1   11.70    3.90
 -11  -2   1    9.40    2.70
 -11  -2   1    9.50    3.20
 -11   2   1   16.60    4.80
 -11   2   1    9.20    4.00
 -11   2   1   18.50    5.20
 -11   2   1   19.90    7.90
 -11   2   1   13.20    2.60
 -11   2   1   16.70    5.60
 -11   2   1   10.60    6.40
 -11   2   1    8.40    3.80
 -10  -2   1  126.39    8.50
 -10  -2   1  129.09   10.10
 -10  -2   1  127.19    8.90
 -10  -2   1  132.79   10.40
 -10  -2   1  127.29   10.10
 -10  -2   1  123.99   11.90
 -10  -2   1  131.19    9.20
 -10  -2   1  124.29    9.10
 -10  -2   1  135.99   11.20
 -10  -2   1  121.39   10.10
 -10   2   1  141.59   18.40
 -10   2   1  110.99   10.60
 -10   2   1  120.39    9.10
 -10   2   1   99.79   11.30
 -10   2   1  126.19   11.80
 -10   2   1  133.99    8.50
 -10   2   1  124.29   10.60
 -10   2   1  134.79   15.20
 -10   2   1  145.49   27.90
 -10   2   1  122.49   10.80
 -10   2   1  127.79    8.60
 -10   2   1  124.39   11.40
 -10   2   1  161.58   13.30
 -10   2   1  128.79   10.90
 -10   2   1  132.29    8.70
 -10   2   1  115.19   11.40
 -10   2   1  137.59    8.50
 -10   2   1  170.38   13.90
 -10   2   1  130.29   10.90
  -9  -2   1   11.40    2.70
  -9  -2   1   15.10    3.70
  -9  -2   1   14.60    3.90
  -9  -2   1   15.40    3.70
  -9  -2   1   18.20    5.00
  -9  -2   1   12.00    3.40
  -9  -2   1   12.90    3.20
  -9  -2   1   19.40    4.30
  -9  -2   1   11.00    5.70
  -9  -2   1    6.70    2.40
  -9  -2   1   19.80    6.40
  -9  -2   1   15.90    4.20
  -9  -2   1   15.60    5.00
  -9   2   1   12.40    3.10
  -9   2   1   14.70    4.40
  -9   2   1   13.10    3.00
  -9   2   1   17.30   13.80
  -9   2   1   11.00    3.20
  -9   2   1   21.10    9.00
  -9   2   1   11.90    4.10
  -9   2   1    6.00    3.40
  -9   2   1   15.90    4.70
  -9   2   1    9.00    5.40
  -9   2   1   17.30    4.70
  -9   2   1   10.80    3.60
  -9   2   1   18.30    5.20
  -9   2   1   12.00    3.90
  -9   2   1   14.70    4.50
  -9   2   1   13.00    4.40
  -9   2   1    8.20    5.70
  -9   2   1   14.10    5.60
  -9   2   1    8.50    2.80
  -9   2   1    2.90    7.10
  -9   2   1   11.90    3.80
  -8  -2   1  186.48   14.30
  -8  -2   1  169.78   13.80
  -8  -2   1  162.58   11.90
  -8  -2   1  180.68   14.30
  -8  -2   1  177.88   11.90
  -8  -2   1  182.58   12.50
  -8  -2   1  186.68   10.80
  -8  -2   1  200.98   16.20
  -8  -2   1  165.48   11.90
  -8  -2   1  182.68   13.50
  -8  -2   1  189.88   12.30
  -8  -2   1  181.08   13.20
  -8  -2   1  179.38   11.60
  -8  -2   1  180.18   11.40
  -8  -2   1  139.59   17.80
  -8  -2   1  184.78   13.50
  -8   2   1  181.08   13.50
  -8   2   1  182.28   12.80
  -8   2   1  168.18   16.50
  -8   2   1  172.48   14.10
  -8   2   1  177.78   12.80
  -8   2   1  177.28   14.20
  -8   2   1  183.98   14.70
  -8   2   1  172.78   13.40
  -8   2   1  155.18   13.70
  -8   2   1  175.78   12.30
   8   2  -1  170.88  105.39
  -8   2   1  177.58   10.90
  -8   2   1  182.98   15.30
  -8   2   1  181.58   13.30
  -8   2   1  199.18   14.40
  -8   2   1  186.98   21.10
  -8   2   1  174.58   11.30
  -8   2   1  180.58   10.80
  -8   2   1  173.98   12.80
  -8   2   1  171.68   11.00
  -8   2   1  182.48   15.80
  -8   2   1  202.88   14.60
  -7  -2   1  107.99    9.20
  -7  -2   1  113.19    8.60
  -7  -2   1  111.39    7.40
  -7  -2   1  111.29   10.00
  -7  -2   1  107.19    7.90
  -7  -2   1   99.39   10.80
  -7  -2   1  107.59    9.60
   7  -2  -1  172.28   27.40
  -7  -2   1  111.39    9.90
  -7  -2   1  112.59    9.70
  -7  -2   1  110.29   25.80
  -7  -2   1  105.49    8.60
  -7  -2   1  114.89    8.30
   7  -2  -1  189.38   69.29
  -7  -2   1  104.49    8.70
  -7  -2   1   98.09   11.60
  -7  -2   1  112.49    8.30
  -7  -2   1  105.59    8.20
   7  -2  -1  259.27   58.09
  -7   2   1  114.29    8.70
  -7   2   1  120.49    9.40
   7   2  -1   71.29   65.19
  -7   2   1  112.69    9.70
  -7   2   1  113.29    9.90
  -7   2   1  100.29    8.60
  -7   2   1  111.49    9.10
  -7   2   1  116.79    7.70
  -7   2   1  118.49    7.90
   7   2  -1  117.19   36.40
  -7   2   1  119.29   10.90
   7   2  -1   93.09   58.69
  -7   2   1  114.79   12.10
  -7   2   1  112.59    7.70
  -7   2   1  111.59   10.50
  -7   2   1  126.99   11.20
  -7   2   1  112.29    9.50
  -7   2   1  106.49    9.80
  -7   2   1  102.69   10.30
  -7   2   1  101.29    8.10
  -7   2   1  107.49    9.40
  -7   2   1  103.29   10.00
  -7   2   1  128.19   15.00
  -7   2   1  105.49   10.60
   6  -2  -1  331.27   35.60
   6  -2  -1  308.77   69.39
   6  -2  -1  306.07   82.89
   6  -2  -1  262.97   34.70
   6   2  -1  299.57  113.19
   6   2  -1  266.47   43.40
   6   2  -1  422.66   76.19
   5  -2  -1 1487.55   82.69
   5  -2  -1 1600.04  146.89
   5  -2  -1 1572.74   86.89
   5   2  -1 1562.34  154.58
   5   2  -1 1494.65  102.09
   4  -2  -1  857.81   51.59
   4  -2  -1  922.61   59.19
   4   2  -1  855.61   68.49
   4   2  -1  955.60  104.99
   3  -2  -1  345.17   23.60
   3  -2  -1  313.47   28.40
   3   2  -1  328.27   36.90
   3   2  -1  382.06   57.69
  -2  -2   1 2170.58  173.98
  -2  -2   1 1836.22   71.39
   2  -2  -1 1940.11   69.79
   2  -2  -1 1890.91   84.79
   2   2  -1 1798.62  125.59
   2   2  -1 1950.60   98.99
   1  -2  -1 7427.86  249.68
   1  -2  -1 7321.87  287.87
  -1  -2   1 6748.02  257.27
  -1  -2   1 7495.45  260.37
  -1  -2   1 7947.70  322.57
   1  -2  -1 7526.65  266.97
   1   2  -1 7479.35  278.37
  -1   2   1 7533.15  251.17
   1   2  -1 7299.97  307.37
   0  -2   1 1418.26   53.99
   0  -2   1 1431.36   82.69
   0  -2  -1 1295.97   58.39
   0  -2  -1 1261.37   76.29
   0   2  -1 1268.87   62.69
   0   2  -1 1367.06   76.29
   0   2   1 1349.66   77.29
   0   2   1 1098.79   80.09
   1  -2   1  561.64   29.30
   1  -2   1  535.55   38.20
  -1  -2  -1  571.74   51.49
  -1  -2  -1  464.15   29.60
  -1   2  -1  539.55   32.20
   1   2   1  551.44   32.30
  -1   2  -1  516.15   32.80
   1   2   1  482.15   59.09
   1   2   1  500.75   45.30
  -2  -2  -1 7192.98  312.97
  -2  -2  -1 6985.50  253.87
   2  -2   1 6484.55  256.17
   2  -2   1 7463.75  257.17
   2  -2   1 6874.11  255.67
   2   2   1 6857.61  293.67
   2   2   1 7230.98  254.07
   3  -2   1  114.79   16.10
   3  -2   1  134.69   25.00
   3  -2   1  128.29   23.20
   3  -2   1  125.99   17.30
   3   2   1  105.49   32.30
   3   2   1  103.69   43.90
   3   2   1  139.69   16.60
   4  -2   1  516.05   63.59
   4  -2   1  664.63   47.00
   4  -2   1  608.24   48.70
   4   2   1  728.23   78.19
   4   2   1  715.63   42.40
   5  -2   1  162.48   39.10
   5  -2   1  123.19   22.80
   5  -2   1  170.38   30.10
   5  -2   1  168.98   33.70
   5   2   1  143.19   45.20
   5   2   1  177.88   20.70
   5   2   1  198.48   80.39
   6  -2   1  417.86   76.59
   6  -2   1  485.35   50.19
   6   2   1  622.94   85.59
   6   2   1  380.26  125.39
  -7  -2  -1   88.89    7.90
  -7  -2  -1   92.49    7.80
  -7  -2  -1   78.19    7.00
  -7  -2  -1   92.79   10.50
  -7  -2  -1   83.69    8.80
   7  -2   1  163.28   33.50
  -7  -2  -1   84.49    8.40
  -7  -2  -1   77.59    8.40
  -7  -2  -1   93.99    7.60
  -7  -2  -1   85.29    6.80
  -7  -2  -1   76.89    7.60
  -7  -2  -1   81.89    8.50
  -7  -2  -1   81.79    7.50
  -7  -2  -1   95.19    9.60
  -7  -2  -1   88.39    7.10
  -7   2  -1   86.19    7.10
  -7   2  -1   76.39    6.80
  -7   2  -1   92.99    8.50
  -7   2  -1   90.69    9.10
  -7   2  -1   89.09    9.90
  -7   2  -1   93.89    9.10
  -7   2  -1   86.89    8.90
  -7   2  -1   92.59    9.20
  -7   2  -1   86.79    8.40
  -7   2  -1   81.49    7.40
   7   2   1   62.39   55.89
  -7   2  -1   85.99    6.80
  -7   2  -1   73.49    7.60
  -7   2  -1   81.49    7.80
  -7   2  -1   92.39    9.30
  -7   2  -1   91.39    9.50
  -7   2  -1   94.59   12.90
  -7   2  -1   92.59    9.90
  -7   2  -1   93.69    9.70
  -8  -2  -1   20.30    4.40
  -8  -2  -1   14.80    4.40
  -8  -2  -1   11.90    3.50
   8  -2   1   86.09   29.70
  -8  -2  -1   17.00    4.10
  -8  -2  -1   13.50    6.90
  -8  -2  -1   22.00    5.00
  -8  -2  -1   14.00    3.60
  -8  -2  -1   20.10    4.70
  -8  -2  -1   12.50    4.70
  -8  -2  -1   13.40    3.40
  -8  -2  -1   16.60    4.70
  -8   2  -1   17.20    5.40
  -8   2  -1   18.00    4.00
  -8   2  -1   20.60    5.50
  -8   2  -1   14.30    4.20
  -8   2  -1   16.00    4.10
   8   2   1   74.59   75.99
  -8   2  -1   16.80    4.60
  -8   2  -1   20.50    5.80
  -8   2  -1   14.70    4.90
  -8   2  -1   15.00    4.00
  -8   2  -1   17.70    5.10
  -8   2  -1   14.20    5.10
  -8   2  -1   17.80    5.40
  -8   2  -1   24.90    6.20
  -8   2  -1   13.90    4.70
  -8   2  -1   12.30    4.60
  -8   2  -1   20.80    8.40
  -8   2  -1   34.70    7.80
  -9  -2  -1   75.59    7.00
  -9  -2  -1   70.09    8.10
  -9  -2  -1   78.49    9.90
  -9  -2  -1   78.99    8.10
  -9  -2  -1   69.39    8.10
  -9  -2  -1   73.79    8.40
  -9  -2  -1   72.89    8.50
  -9  -2  -1   75.59    7.90
  -9  -2  -1   73.09    7.50
  -9  -2  -1   73.99    7.30
  -9  -2  -1   70.19    6.90
  -9  -2  -1   85.29    7.50
  -9   2  -1   82.89   10.10
  -9   2  -1   68.79    6.20
  -9   2  -1   81.79    9.50
  -9   2  -1   69.99    7.30
  -9   2  -1   75.49   16.30
  -9   2  -1   76.89   10.30
  -9   2  -1   75.69    7.70
  -9   2  -1   68.19    8.30
  -9   2  -1   75.09    9.30
  -9   2  -1   68.19    8.70
  -9   2  -1   72.99    8.40
  -9   2  -1   68.79    8.50
  -9   2  -1   80.99    8.80
  -9   2  -1   70.79    6.60
  -9   2  -1   68.09    8.30
  -9   2  -1   67.49    9.40
  -9   2  -1   94.09   11.00
  -9   2  -1   85.09   11.70
 -10  -2  -1   61.09    7.10
 -10  -2  -1   49.90    8.10
 -10  -2  -1   73.39    9.20
 -10  -2  -1   68.29    6.60
 -10  -2  -1   70.79    6.40
 -10  -2  -1   54.59    7.10
 -10  -2  -1   69.59    7.20
 -10  -2  -1   67.99    8.00
 -10  -2  -1   66.69    6.80
 -10   2  -1   70.79    8.10
 -10   2  -1   66.59    8.90
 -10   2  -1   64.69    7.30
 -10   2  -1   75.19    8.60
 -10   2  -1   57.19   18.30
 -10   2  -1   79.59   11.60
 -10   2  -1   70.39    8.10
 -10   2  -1   69.49    6.00
 -10   2  -1   90.49   11.60
 -10   2  -1   70.29    8.10
 -10   2  -1   65.89    6.90
 -10   2  -1   50.79    7.70
 -10   2  -1   71.59    8.50
 -11  -2  -1   16.00    3.20
 -11  -2  -1   13.70    3.20
 -11  -2  -1   17.00    3.60
 -11  -2  -1   14.50    3.90
 -11  -2  -1   11.30    2.70
 -11  -2  -1   12.00    2.50
 -11  -2  -1   13.60    3.20
 -11   2  -1   25.10    5.20
 -11   2  -1   11.50    3.50
 -11   2  -1   15.40    4.10
 -11   2  -1   24.80    6.10
 -11   2  -1    9.50    7.30
 -11   2  -1   20.80    6.60
 -11   2  -1   12.40    4.50
 -11   2  -1   13.10    4.00
 -12  -2  -1   20.70    3.10
 -12  -2  -1   25.10    2.80
 -12  -3   1   19.00    2.50
 -12  -3   1   16.50    2.30
 -12  -3   1   17.40    2.10
 -12  -3   1   11.50    2.50
 -11  -3   1   65.29    6.30
 -11  -3   1   77.19    7.10
 -11  -3   1   68.29    6.20
 -11  -3   1   70.29    7.70
 -11  -3   1   69.49    5.70
 -11  -3   1   76.79    6.60
 -11   3   1   83.89    9.30
 -11   3   1   82.59   12.10
 -11   3   1   85.69    9.30
 -11   3   1   93.99    9.30
 -10  -3   1  122.69    9.60
 -10  -3   1  104.19    9.20
 -10  -3   1  121.59   11.50
 -10  -3   1  114.39    9.60
 -10  -3   1  120.09    8.10
 -10  -3   1  118.29    8.70
 -10  -3   1  118.19   10.10
 -10  -3   1  113.39    8.20
 -10  -3   1  113.59    9.20
 -10  -3   1  126.59    8.70
 -10   3   1  107.79    9.90
 -10   3   1  103.29   10.90
 -10   3   1  121.69    7.90
 -10   3   1  158.48   24.60
 -10   3   1  122.59   11.00
 -10   3   1  126.89    8.40
 -10   3   1   82.79   11.20
 -10   3   1  126.99   11.00
 -10   3   1  146.39   11.80
 -10   3   1  121.29   11.20
 -10   3   1  123.89   16.90
 -10   3   1  107.29   11.00
 -10   3   1  132.99   11.20
 -10   3   1  114.09   11.10
 -10   3   1   98.09   14.70
 -10   3   1  108.09    7.30
 -10   3   1  131.89   11.80
 -10   3   1   95.79   10.70
 -10   3   1  144.09   15.80
 -10   3   1   97.49   16.40
  -9  -3   1  270.87   14.20
  -9  -3   1  281.37   15.80
  -9  -3   1  292.97   16.60
  -9  -3   1  302.57   19.80
  -9  -3   1  269.97   15.20
  -9  -3   1  288.07   16.90
  -9  -3   1  301.17   18.00
  -9  -3   1  262.77   17.00
  -9  -3   1  270.67   15.40
  -9  -3   1  291.27   16.90
  -9  -3   1  275.07   16.30
  -9   3   1  289.67   18.50
  -9   3   1  273.77   18.00
  -9   3   1  280.67   14.90
  -9   3   1  296.97   28.50
  -9   3   1  303.97   18.50
  -9   3   1  280.27   14.50
  -9   3   1  276.57   18.80
  -9   3   1  286.77   14.50
  -9   3   1  273.07   20.80
  -9   3   1  296.67   16.70
  -9   3   1  284.47   19.50
  -9   3   1  274.37   19.00
  -9   3   1  289.67   17.60
  -9   3   1  278.57   16.90
  -9   3   1  258.17   17.80
  -9   3   1  291.67   15.00
  -9   3   1  259.37   18.10
  -9   3   1  296.07   21.20
  -9   3   1  239.18   17.80
  -9   3   1  271.97   16.40
  -9   3   1  311.37   22.70
  -8  -3   1   94.79    8.70
  -8  -3   1  111.09   10.40
  -8  -3   1  107.89   10.60
  -8  -3   1  100.79    8.10
  -8  -3   1   93.69    8.80
  -8  -3   1   96.09    9.20
  -8  -3   1  102.29   11.70
  -8  -3   1  103.29    8.40
  -8  -3   1  102.59    8.40
  -8  -3   1  105.59    8.80
  -8  -3   1   90.19    7.90
   8   3  -1  222.18  106.69
  -8   3   1  101.89   11.70
  -8   3   1  109.99   12.50
  -8   3   1  101.39    9.00
  -8   3   1   93.49   10.70
  -8   3   1   97.69    9.60
  -8   3   1  106.99   11.30
  -8   3   1  108.19   12.10
  -8   3   1   87.89   10.30
  -8   3   1   92.79    8.40
  -8   3   1  107.09   16.00
  -8   3   1  105.69    7.80
  -8   3   1  107.09   10.20
  -8   3   1  104.09    8.90
  -8   3   1   98.49    9.20
  -8   3   1  112.09   10.60
  -8   3   1   92.89    9.70
  -8   3   1  100.49    7.80
  -8   3   1  104.39   10.40
  -8   3   1   97.29    9.10
  -8   3   1  106.99    8.00
  -8   3   1  107.39   11.20
  -7  -3   1  954.70   39.90
  -7  -3   1  903.71   44.30
  -7  -3   1  914.11   38.60
  -7  -3   1  938.81   41.60
  -7  -3   1  865.31   39.70
  -7  -3   1  903.91   37.10
  -7  -3   1  932.71   38.20
  -7  -3   1  918.11   37.80
   7  -3  -1  834.12   72.99
  -7  -3   1  942.11   41.20
   7  -3  -1  931.91  102.99
  -7  -3   1  915.51   36.10
  -7  -3   1  953.90   38.80
  -7  -3   1  918.81   37.80
  -7   3   1  876.51   36.40
  -7   3   1  906.11   39.50
  -7   3   1  921.21   36.70
   7   3  -1  918.91  140.29
  -7   3   1  976.10   36.70
  -7   3   1  966.00   40.10
   7   3  -1  885.41   81.59
  -7   3   1  969.90   39.10
  -7   3   1  976.40   40.80
  -7   3   1  973.60   41.60
  -7   3   1  943.81   43.60
  -7   3   1  969.20   42.60
  -7   3   1  918.71   41.10
  -7   3   1  946.31   42.60
  -7   3   1  975.50   45.10
  -7   3   1  989.70   51.39
  -7   3   1  918.71   40.80
  -7   3   1  893.21   38.70
  -7   3   1  953.70   41.10
  -7   3   1  968.20   43.80
  -7   3   1  924.01   42.20
   6  -3  -1  263.27   67.59
   6  -3  -1  260.87   36.50
   6  -3  -1  301.07   28.60
   6   3  -1  264.07   40.60
   6   3  -1  292.87   96.29
   5  -3  -1  418.26   42.50
   5  -3  -1  456.85   32.70
   5   3  -1  278.37  132.39
   5   3  -1  452.45   50.29
   5   3  -1  508.35   82.69
  -4  -3   1  991.60   41.20
   4  -3  -1 1070.19   50.09
   4  -3  -1  976.20   64.59
   4   3  -1 1047.40   76.49
   4   3  -1 1005.40  113.79
  -3  -3   1  567.14   30.10
   3  -3  -1  532.25   41.60
   3  -3  -1  568.34   27.40
   3   3  -1  559.64   73.99
   3   3  -1  557.34   49.70
   2  -3  -1 2028.10   74.49
   2  -3  -1 2042.60   96.09
  -2  -3   1 2087.59   83.39
   2   3  -1 1982.40  104.99
   2   3  -1 2178.68  153.58
   1  -3  -1 6070.09  258.57
  -1  -3   1 5830.62  213.58
  -1  -3   1 5815.72  295.07
   1  -3  -1 5881.21  226.18
  -1  -3   1 6211.98  220.68
   1  -3  -1 6051.99  209.18
  -1   3   1 5980.00  247.78
  -1   3   1 6401.66  242.08
   1   3  -1 5632.24  233.88
   1   3  -1 5929.71  279.67
   0  -3  -1 4412.26  204.78
   0  -3  -1 4141.99  164.58
   0  -3   1 4314.57  168.38
   0  -3   1 4454.05  235.48
   0   3  -1 4406.96  194.78
   0   3   1 3686.93  200.88
   0   3  -1 4311.07  172.58
   0   3   1 4464.45  195.28
  -1  -3  -1 3731.33  142.09
   1  -3   1 3590.24  133.29
   1  -3   1 3653.93  168.78
   1   3   1 2936.21  194.38
   1   3   1 3605.94  179.18
  -1   3  -1 3601.54  154.08
  -1   3  -1 3619.54  146.49
   1   3   1 3544.05  145.39
  -2  -3  -1  343.27   26.50
   2  -3   1  376.26   25.70
   2  -3   1  333.97   35.00
   2   3   1  345.47   29.20
   2   3   1  332.97   46.10
   2   3   1  270.67   53.59
   3  -3   1  581.64   44.30
  -3  -3  -1  506.25   36.90
   3  -3   1  578.64   37.90
   3   3   1  499.35   62.89
   3   3   1  435.16   81.29
   3   3   1  569.24   40.60
   4  -3   1 1242.48   75.39
   4  -3   1 1312.57   72.99
  -4  -3  -1 1283.87   51.79
   4  -3   1 1462.85   93.59
   4   3   1 1325.87   71.79
   4   3   1 1039.40  142.59
   4   3   1 1354.66  116.19
  -5  -3  -1  388.16   20.70
   5  -3   1  381.46   37.00
   5  -3   1  389.36   46.90
   5   3   1  382.46   34.80
   5   3   1  469.45   69.49
   5   3   1  252.37   93.39
  -6  -3  -1  351.26   21.60
  -6  -3  -1  394.16   19.10
  -6  -3  -1  378.56   20.30
   6  -3   1  457.55   44.30
  -6  -3  -1  403.56   21.70
  -6  -3  -1  396.46   19.30
  -6  -3  -1  356.66   18.00
  -6  -3  -1  376.76   18.60
  -6   3  -1  379.26   22.70
  -6   3  -1  399.26   30.00
  -6   3  -1  409.36   22.80
   6   3   1  540.95   84.49
  -6   3  -1  415.06   22.60
   6   3   1  370.56  131.09
  -6   3  -1  380.76   21.70
  -6   3  -1  379.46   21.80
  -6   3  -1  387.56   21.10
  -6   3  -1  446.06   20.40
  -6   3  -1  389.96   19.90
  -6   3  -1  403.16   21.20
  -7  -3  -1  171.18   12.80
  -7  -3  -1  163.28   12.00
  -7  -3  -1  173.58   11.10
  -7  -3  -1  169.08   11.00
  -7  -3  -1  158.38   11.20
  -7  -3  -1  161.08   10.60
  -7  -3  -1  170.08   11.10
  -7  -3  -1  167.78   11.60
  -7  -3  -1  163.58   10.00
   7  -3   1  123.89   39.80
  -7  -3  -1  167.08   12.60
  -7  -3  -1  147.19   11.90
   7  -3   1  192.58   40.00
  -7  -3  -1  165.68   13.60
  -7   3  -1  168.28   12.80
   7   3   1  111.89   78.99
  -7   3  -1  155.48   13.50
  -7   3  -1  159.98   10.00
  -7   3  -1  183.18   14.10
  -7   3  -1  157.58   13.00
  -7   3  -1  163.88   13.00
  -7   3  -1  147.69   15.20
  -7   3  -1  169.68   13.40
  -7   3  -1  158.78   17.00
  -7   3  -1  153.18   11.10
  -7   3  -1  166.38   12.00
  -7   3  -1  160.28   10.80
  -7   3  -1  165.38   13.00
  -7   3  -1  159.58   13.80
  -7   3  -1  178.68   13.20
  -7   3  -1  147.29   10.30
  -7   3  -1  185.88   15.60
  -7   3  -1  167.78   13.80
  -8  -3  -1   59.09    7.10
  -8  -3  -1   62.69    6.60
  -8  -3  -1   66.59    6.80
  -8  -3  -1   66.59    8.10
  -8  -3  -1   70.09    7.50
  -8  -3  -1   64.29    7.90
  -8  -3  -1   62.79    6.50
  -8  -3  -1   70.69    7.20
  -8  -3  -1   71.09    7.00
  -8  -3  -1   64.99    8.70
  -8  -3  -1   74.89    8.10
  -8  -3  -1   66.49    8.20
  -8   3  -1   77.69   10.50
  -8   3  -1   61.39    6.50
  -8   3  -1   71.09    9.00
  -8   3  -1   67.49    8.70
  -8   3  -1   61.79    8.00
  -8   3  -1   65.59    8.20
  -8   3  -1   58.79    8.10
  -8   3  -1   59.89    8.60
  -8   3  -1   74.49    9.50
  -8   3  -1   76.89   12.40
  -8   3  -1   55.69    8.20
  -8   3  -1   64.79    8.60
  -8   3  -1   61.99    6.80
   8   3   1  159.38   72.79
  -8   3  -1   70.59    6.60
  -8   3  -1   70.19    9.10
  -8   3  -1   66.19    8.30
  -8   3  -1   65.19    6.50
  -8   3  -1   62.89    7.40
  -9  -3  -1   98.89    9.30
  -9  -3  -1   89.79    8.40
  -9  -3  -1   93.89   10.70
  -9  -3  -1   82.49    8.30
  -9  -3  -1   90.49    9.30
  -9  -3  -1   90.09    7.80
  -9  -3  -1   88.09    8.80
  -9  -3  -1   82.39    8.00
  -9  -3  -1   85.69    7.70
  -9  -3  -1   88.99    9.30
  -9  -3  -1   92.49    8.00
  -9   3  -1   80.69    9.70
  -9   3  -1   90.49   15.80
  -9   3  -1   93.09   10.30
  -9   3  -1   84.39    9.80
  -9   3  -1   86.89   11.20
  -9   3  -1   79.09    8.00
  -9   3  -1   91.79    9.10
  -9   3  -1   98.79    8.20
  -9   3  -1   76.19    9.60
  -9   3  -1   88.69   10.10
  -9   3  -1  117.79   16.20
  -9   3  -1   90.69   10.80
  -9   3  -1   97.89   11.10
  -9   3  -1  100.09   15.60
  -9   3  -1   81.79    9.10
  -9   3  -1   96.89   14.50
  -9   3  -1   91.99   10.50
 -10  -3  -1  384.36   24.80
 -10  -3  -1  331.17   16.40
 -10  -3  -1  312.47   18.10
 -10  -3  -1  289.37   17.50
 -10  -3  -1  314.77   16.10
 -10  -3  -1  281.27   16.30
 -10  -3  -1  335.47   18.60
 -10  -3  -1  352.06   18.30
 -10   3  -1  336.37   20.70
 -10   3  -1  328.17   19.20
 -10   3  -1  304.27   17.30
 -10   3  -1  288.17   18.50
 -10   3  -1  288.17   20.40
 -10   3  -1  283.37   18.80
 -10   3  -1  290.57   17.90
 -10   3  -1  271.37   17.50
 -10   3  -1  258.27   26.20
 -10   3  -1  329.67   20.00
 -10   3  -1  343.27   21.50
 -11  -3  -1    0.90    1.30
 -11  -3  -1    0.90    1.30
 -11  -3  -1   -0.80    1.30
 -11  -3  -1    0.70    1.10
 -11  -3  -1    0.40    1.80
 -11  -3  -1    0.50    0.90
 -11  -3  -1    0.60    1.40
 -11   3  -1    0.10    3.20
 -11   3  -1    8.10    5.70
 -11   3  -1    7.50    7.00
 -11   3  -1   10.30    4.10
 -11   3  -1   -0.90    3.20
 -12  -4   1    4.80    1.70
 -12  -4   1    4.20    1.40
 -11  -4   1   61.69    6.90
 -11  -4   1   53.79    5.30
 -11  -4   1   50.89    5.00
 -11  -4   1   58.79    4.80
 -11  -4   1   56.99    5.20
 -11  -4   1   49.99    5.40
 -10  -4   1   47.40    4.60
 -10  -4   1   39.80    6.30
 -10  -4   1   53.39    7.20
 -10  -4   1   44.80    5.20
 -10  -4   1   48.70    5.40
 -10  -4   1   45.80    5.20
 -10  -4   1   39.70    4.90
 -10  -4   1   46.90    5.40
 -10  -4   1   38.40    5.40
 -10   4   1   66.39   10.40
 -10   4   1   83.09   14.20
 -10   4   1   51.19    9.10
 -10   4   1   53.59    7.50
 -10   4   1   48.90    8.30
 -10   4   1   38.10   12.20
 -10   4   1   36.50    7.70
 -10   4   1   88.29   15.30
 -10   4   1   41.30    8.80
 -10   4   1   51.99    8.90
 -10   4   1   65.09    7.90
 -10   4   1   52.99    7.90
 -10   4   1   56.59    5.30
 -10   4   1   46.70   11.40
 -10   4   1   34.20    7.00
 -10   4   1   57.59   15.60
  -9  -4   1  630.94   31.90
  -9  -4   1  685.43   29.90
  -9  -4   1  716.13   31.90
  -9  -4   1  672.53   30.90
  -9  -4   1  670.53   30.60
  -9  -4   1  746.23   31.10
  -9  -4   1  728.13   28.90
  -9  -4   1  737.13   32.00
  -9  -4   1  756.22   36.30
  -9   4   1  645.14   34.90
  -9   4   1  739.43   29.50
  -9   4   1  760.42   46.60
  -9   4   1  716.83   31.50
  -9   4   1  765.82   29.90
  -9   4   1  756.62   33.80
  -9   4   1  734.63   37.80
  -9   4   1  646.74   35.30
  -9   4   1  692.73   34.70
  -9   4   1  721.63   34.70
  -9   4   1  649.34   33.40
  -9   4   1  653.53   28.00
  -9   4   1  678.33   33.70
  -9   4   1  696.43   32.10
  -9   4   1  763.22   34.20
  -9   4   1  692.13   29.00
  -9   4   1  578.14   40.30
  -9   4   1  732.93   31.90
  -9   4   1  658.93   37.00
  -8  -4   1   70.99    8.60
  -8  -4   1   70.69    6.00
  -8  -4   1   73.29    6.80
  -8  -4   1   76.99    6.90
  -8  -4   1   76.69    7.20
  -8  -4   1   69.29    7.60
  -8  -4   1   73.19    7.30
  -8  -4   1   73.29    7.80
  -8  -4   1   71.09    7.00
  -8  -4   1   66.29    7.00
  -8  -4   1   85.99    8.30
  -8   4   1   65.49    8.20
  -8   4   1   69.69    9.80
  -8   4   1   68.39    9.10
  -8   4   1   73.19    8.20
  -8   4   1   70.39   12.60
  -8   4   1   71.39    6.20
  -8   4   1   70.19    7.60
  -8   4   1   69.69    6.90
  -8   4   1   65.39    7.30
  -8   4   1   64.39    8.30
  -8   4   1   79.49    9.80
  -8   4   1   69.29    8.60
   8   4  -1   98.19   78.99
  -8   4   1   70.99    6.10
  -8   4   1   73.79    9.30
  -8   4   1   66.09    8.70
  -8   4   1   59.19    8.80
  -8   4   1   71.79   10.00
  -8   4   1   71.09   10.00
  -8   4   1   65.99    7.10
  -8   4   1   60.79    6.70
  -8   4   1   82.89   11.10
  -7  -4   1 2185.38   81.49
  -7  -4   1 2122.29   76.59
  -7  -4   1 2094.19   81.09
   7  -4  -1 2009.60  127.99
   7  -4  -1 2156.18  178.98
  -7  -4   1 2085.69   77.19
  -7  -4   1 2122.99   76.39
  -7  -4   1 2109.89   77.79
  -7  -4   1 1994.20   77.69
  -7  -4   1 1996.80   78.39
  -7  -4   1 2052.99   76.69
  -7  -4   1 2182.38   79.19
  -7  -4   1 2053.39   76.59
  -7  -4   1 2064.79   74.79
  -7   4   1 2052.29   81.39
  -7   4   1 2060.79   79.29
  -7   4   1 2199.38   92.79
  -7   4   1 2066.29   82.49
  -7   4   1 2131.49   79.59
  -7   4   1 2009.90   77.89
  -7   4   1 2148.58   82.99
  -7   4   1 2128.69   80.79
  -7   4   1 2084.39   77.99
  -7   4   1 2053.09   75.09
  -7   4   1 2112.09   81.39
  -7   4   1 2057.69   82.89
   7   4  -1 2329.67  226.18
  -7   4   1 2239.88   84.79
  -7   4   1 2205.18   84.19
   7   4  -1 1553.14  237.58
  -7   4   1 2075.39   80.19
  -7   4   1 2065.49   84.49
  -7   4   1 1945.21   75.49
  -7   4   1 2128.79   81.39
  -7   4   1 2051.19   77.39
  -6  -4   1  435.96   19.70
  -6  -4   1  404.16   21.20
  -6  -4   1  406.66   19.90
   6  -4  -1  596.44  136.19
   6  -4  -1  445.56   49.10
  -6  -4   1  423.86   20.40
  -6  -4   1  414.16   19.90
  -6  -4   1  433.16   22.70
  -6  -4   1  402.06   20.60
  -6  -4   1  399.66   19.30
  -6   4   1  445.76   24.60
  -6   4   1  446.76   22.70
  -6   4   1  444.46   23.20
  -6   4   1  408.46   20.80
   6   4  -1  432.16  112.39
  -6   4   1  428.96   21.00
  -6   4   1  494.95   30.70
  -6   4   1  513.25   26.20
  -6   4   1  450.35   25.40
  -6   4   1  458.35   24.70
   6   4  -1  462.85   53.59
   6   4  -1  421.46  145.49
  -6   4   1  418.36   23.90
  -6   4   1  470.35   22.40
  -5  -4   1 1118.99   45.50
   5  -4  -1 1137.39   51.89
   5  -4  -1 1113.79   79.49
   5  -4  -1  895.51   89.79
   5   4  -1 1023.00  163.98
   5   4  -1 1121.49  133.49
   5   4  -1 1159.28   88.49
   4  -4  -1  741.93   58.49
  -4  -4   1  773.82   33.80
   4  -4  -1  711.73   35.20
   4   4  -1  802.52   67.29
   4   4  -1  537.85  105.09
   4   4  -1  741.53  100.99
  -3  -4   1  827.92   43.70
   3  -4  -1  824.82   58.59
  -3  -4   1  844.82   36.50
   3  -4  -1  842.12   36.20
   3   4  -1  838.82   97.49
   3   4  -1  644.84  105.89
   3   4  -1  823.72   64.69
   2  -4  -1 6470.35  216.58
   2  -4  -1 5762.12  245.38
  -2  -4   1 6111.39  230.38
   2   4  -1 6414.96  258.07
   2   4  -1 7088.49  326.27
   2   4  -1 5594.74  333.77
  -1  -4   1  762.02   45.20
   1  -4  -1  719.73   31.80
   1  -4  -1  625.14   45.90
  -1  -4   1  682.33   37.40
   1   4  -1  646.14   71.19
   1   4  -1  723.53   53.59
   1   4  -1  631.54   77.79
  -1   4   1  772.42   58.99
  -1   4   1  697.43   62.09
   0  -4   1  936.11   44.10
   0  -4   1  918.61   55.19
   0  -4  -1 1006.20   65.69
   0   4  -1  754.92   70.69
   0   4  -1  835.92   72.19
   0   4   1  747.63   76.19
   0   4   1  886.71   74.59
   1  -4   1 6387.16  247.88
   1  -4   1 6302.07  223.68
   1  -4   1 6030.80  283.37
  -1  -4  -1 6475.95  238.88
   1   4   1 5891.91  242.08
  -1   4  -1 6467.35  260.77
   1   4   1 5324.27  306.77
   1   4   1 6333.57  284.47
  -1   4  -1 6238.38  281.77
   2  -4   1  477.55   55.59
  -2  -4  -1  524.85   37.20
   2  -4   1  457.45   30.70
   2   4   1  523.25   62.79
   2   4   1  372.06   71.89
  -3  -4  -1 1280.77   67.09
   3  -4   1 1157.38   87.69
   3  -4   1 1202.88   61.49
  -3  -4  -1 1195.18   49.50
   3   4   1 1223.78   72.39
   3   4   1 1189.88  108.99
   3   4   1 1055.49  137.09
   4  -4   1 1498.95   77.09
  -4  -4  -1 1489.55   59.69
   4   4   1 1535.85   85.59
   4   4   1 1202.88  163.98
   4   4   1 1577.84  135.79
   5  -4   1  807.82   55.99
  -5  -4  -1  782.92   36.60
   5   4   1  862.11   60.19
   5   4   1  586.04  126.39
   5   4   1  911.31  106.29
  -6  -4  -1  187.58   12.60
  -6  -4  -1  186.78   13.70
  -6  -4  -1  183.98   11.10
  -6  -4  -1  188.08   11.00
   6  -4   1  161.78   43.00
  -6  -4  -1  183.18   11.40
  -6  -4  -1  184.88   13.50
  -6   4  -1  179.58   14.20
  -6   4  -1  193.58   10.70
   6   4   1  161.38   84.49
  -6   4  -1  180.88   15.50
  -6   4  -1  193.88   21.30
  -6   4  -1  193.88   11.60
  -6   4  -1  188.48   14.20
  -6   4  -1  193.38   14.80
   6   4   1  236.48   83.39
  -6   4  -1  185.68   12.90
  -6   4  -1  196.38   14.90
  -6   4  -1  185.48   11.70
  -6   4  -1  198.68   18.30
  -7  -4  -1   58.29    6.00
   7  -4   1   72.59   30.30
  -7  -4  -1   53.19    6.90
   7  -4   1   56.59   28.90
  -7  -4  -1   54.29    6.10
  -7  -4  -1   69.29    7.50
  -7  -4  -1   64.99    6.80
  -7  -4  -1   62.59    6.30
  -7  -4  -1   61.19    7.10
  -7  -4  -1   57.99    5.70
  -7  -4  -1   63.19    6.20
  -7  -4  -1   62.09    7.80
  -7  -4  -1   56.79    6.20
  -7   4  -1   57.59    9.60
  -7   4  -1   58.59    8.10
   7   4   1   35.60   70.69
  -7   4  -1   53.59    6.60
  -7   4  -1   62.79    5.90
  -7   4  -1   70.89    7.50
  -7   4  -1   75.79   11.50
  -7   4  -1   52.39    7.50
  -7   4  -1   59.39    7.90
  -7   4  -1   60.39    8.20
  -7   4  -1   66.29    8.30
  -7   4  -1   55.79    7.80
  -7   4  -1   63.19    8.20
  -7   4  -1   69.89    8.80
  -7   4  -1   68.29    8.90
  -7   4  -1   69.29    9.20
  -7   4  -1   63.99    8.90
  -7   4  -1   58.79    6.30
  -7   4  -1   61.09    7.50
  -8  -4  -1  238.38   13.50
  -8  -4  -1  246.48   15.50
  -8  -4  -1  244.58   14.60
  -8  -4  -1  235.58   15.00
  -8  -4  -1  240.78   14.10
  -8  -4  -1  218.98   14.80
  -8  -4  -1  250.07   14.50
  -8  -4  -1  249.97   16.00
  -8  -4  -1  213.78   15.60
  -8  -4  -1  261.07   15.10
  -8  -4  -1  256.77   18.20
  -8   4  -1  257.17   23.10
  -8   4  -1  236.28   15.00
  -8   4  -1  248.28   18.00
  -8   4  -1  244.88   15.90
  -8   4  -1  256.07   17.80
  -8   4  -1  243.48   17.60
  -8   4  -1  244.88   19.90
  -8   4  -1  240.98   18.70
  -8   4  -1  259.17   18.50
  -8   4  -1  242.98   13.70
  -8   4  -1  256.97   18.40
  -8   4  -1  237.28   14.30
   8   4   1  266.07  123.99
  -8   4  -1  256.77   14.00
  -8   4  -1  242.68   18.70
  -8   4  -1  243.68   16.80
  -8   4  -1  255.47   18.40
  -8   4  -1  243.08   17.40
  -8   4  -1  246.58   18.20
  -9  -4  -1  150.28   11.70
  -9  -4  -1  148.99   10.40
  -9  -4  -1  148.99   12.00
  -9  -4  -1  140.99   10.10
  -9  -4  -1  148.49   10.60
  -9  -4  -1  153.88   11.70
  -9  -4  -1  155.08   13.80
  -9  -4  -1  140.19   11.10
  -9   4  -1  165.78   13.50
  -9   4  -1  144.69   12.40
  -9   4  -1  140.79   11.60
  -9   4  -1  161.28   14.20
  -9   4  -1  142.19   12.90
  -9   4  -1  151.18   10.90
  -9   4  -1  151.38   13.80
  -9   4  -1  154.68   13.50
  -9   4  -1  121.69   11.90
  -9   4  -1  167.78   15.30
  -9   4  -1  142.79   12.80
  -9   4  -1  121.19   12.50
  -9   4  -1  146.09   18.10
  -9   4  -1  136.79   14.40
  -9   4  -1  148.59   14.10
 -10  -4  -1   20.70    4.50
 -10  -4  -1   20.60    4.10
 -10  -4  -1   16.70    3.60
 -10  -4  -1   16.70    4.00
 -10  -4  -1   22.60    5.30
 -10  -4  -1   10.50    3.80
 -10  -4  -1   21.30    4.20
 -10  -4  -1   15.70    4.40
 -10   4  -1   22.70    7.30
 -10   4  -1   17.80    5.20
 -10   4  -1   23.00    8.50
 -10   4  -1   22.00    6.20
 -10   4  -1   17.10    5.30
 -10   4  -1   16.90    5.40
 -10   4  -1   21.60   11.90
 -10   4  -1   16.20    5.50
 -10   4  -1   24.20    8.10
 -10   4  -1   23.70    7.00
 -11  -4  -1  117.89    7.70
 -11  -4  -1  112.19    9.50
 -11  -4  -1   96.59    6.00
 -11  -4  -1  110.69    9.10
 -11  -4  -1  105.29    7.90
 -11  -4  -1   99.19    7.10
 -11   4  -1  134.79   12.40
 -11   4  -1  102.69   12.90
 -11   4  -1  129.99    9.40
 -11   4  -1  126.89   11.60
 -11  -5   1  150.68    8.60
 -11  -5   1  150.28    8.10
 -11  -5   1  146.39   10.50
 -11  -5   1  135.19    8.80
 -11  -5   1  119.39    8.20
 -11  -5   1  153.58    8.80
 -11   5   1  124.19   17.80
 -10  -5   1   99.09    8.20
 -10  -5   1  103.39    7.70
 -10  -5   1   86.09    9.30
 -10  -5   1   86.69    7.50
 -10  -5   1   97.29    7.90
 -10  -5   1   97.39    7.70
 -10  -5   1  105.79   10.20
 -10  -5   1  101.09    7.50
 -10   5   1  126.49   12.20
 -10   5   1   80.49   10.20
 -10   5   1  108.69    9.70
 -10   5   1  103.99    9.50
 -10   5   1  103.89    9.00
 -10   5   1   87.69   12.20
 -10   5   1  122.29   15.70
 -10   5   1  123.89   19.70
 -10   5   1  111.49   13.10
  -9  -5   1  736.23   31.00
  -9  -5   1  720.43   30.20
  -9  -5   1  722.13   35.00
  -9  -5   1  687.63   32.00
  -9  -5   1  705.03   30.90
  -9  -5   1  677.53   31.40
  -9  -5   1  674.63   31.80
  -9  -5   1  704.53   28.40
  -9  -5   1  693.53   29.30
  -9  -5   1  731.23   31.70
  -9   5   1  612.54   42.50
  -9   5   1  726.83   36.10
  -9   5   1  719.43   31.10
  -9   5   1  704.93   35.70
  -9   5   1  733.63   33.30
  -9   5   1  733.63   31.30
  -9   5   1  660.13   33.40
  -9   5   1  721.43   35.70
  -9   5   1  694.73   31.30
  -9   5   1  665.63   35.40
  -9   5   1  754.52   38.70
  -9   5   1  756.52   38.80
  -9   5   1  747.03   29.30
  -9   5   1  729.33   34.50
  -9   5   1  698.53   34.80
  -9   5   1  693.43   37.40
  -9   5   1  714.43   35.80
  -8  -5   1  296.17   15.80
  -8  -5   1  268.07   15.70
  -8  -5   1  272.67   18.20
  -8  -5   1  277.17   16.40
  -8  -5   1  269.17   15.20
  -8  -5   1  243.28   13.00
  -8  -5   1  261.77   14.30
  -8  -5   1  281.87   15.00
  -8  -5   1  242.58   16.00
  -8  -5   1  261.67   15.50
  -8   5   1  252.77   18.50
  -8   5   1  279.47   14.10
  -8   5   1  243.88   18.30
  -8   5   1  262.77   15.60
  -8   5   1  257.47   16.00
  -8   5   1  249.18   13.80
  -8   5   1  255.57   18.20
  -8   5   1  249.28   19.50
  -8   5   1  264.57   15.90
  -8   5   1  275.87   21.40
  -8   5   1  260.17   16.70
  -8   5   1  273.97   20.40
  -8   5   1  255.47   19.50
  -8   5   1  270.37   20.50
  -8   5   1  271.97   18.20
  -8   5   1  280.77   19.80
  -8   5   1  276.57   20.00
  -8   5   1  250.97   24.30
  -7  -5   1  263.97   13.30
  -7  -5   1  275.37   17.90
  -7  -5   1  257.97   16.00
   7  -5  -1  219.78   47.50
  -7  -5   1  283.27   16.30
  -7  -5   1  279.17   15.50
  -7  -5   1  268.17   15.10
  -7  -5   1  266.67   15.20
  -7  -5   1  271.47   14.80
  -7  -5   1  275.37   16.40
  -7  -5   1  268.87   14.50
  -7  -5   1  264.07   14.50
  -7   5   1  275.07   19.30
  -7   5   1  269.27   16.70
  -7   5   1  288.37   17.40
  -7   5   1  274.27   19.50
  -7   5   1  258.97   19.80
  -7   5   1  283.27   15.90
  -7   5   1  297.27   24.90
  -7   5   1  277.07   17.50
  -7   5   1  278.07   19.00
  -7   5   1  284.57   19.80
  -7   5   1  233.08   13.80
  -7   5   1  262.17   19.00
  -7   5   1  266.67   18.10
  -7   5   1  247.78   19.40
  -7   5   1  290.67   14.00
  -7   5   1  287.87   20.30
   7   5  -1  480.15  162.68
  -7   5   1  281.07   18.20
   7   5  -1  211.58   30.30
  -7   5   1  245.28   15.40
  -6  -5   1 1260.37   50.39
  -6  -5   1 1260.77   49.70
  -6  -5   1 1304.97   52.89
  -6  -5   1 1249.97   50.89
   6  -5  -1 1146.79  188.88
  -6  -5   1 1224.08   53.09
  -6  -5   1 1295.47   49.60
  -6  -5   1 1316.37   49.80
  -6  -5   1 1296.67   49.00
   6  -5  -1 1290.07   98.59
  -6   5   1 1364.46   52.89
   6   5  -1 1058.99  183.68
  -6   5   1 1338.07   56.29
  -6   5   1 1344.97   56.69
  -6   5   1 1418.16   63.99
  -6   5   1 1328.67   56.89
  -6   5   1 1360.56   55.79
   6   5  -1 1303.57  101.69
  -6   5   1 1295.57   53.59
  -6   5   1 1293.87   56.39
  -6   5   1 1282.67   53.79
  -6   5   1 1304.97   55.39
  -6   5   1 1306.47   52.39
  -6   5   1 1259.67   50.69
  -6   5   1 1200.48   52.09
  -6   5   1 1236.48   50.99
  -6   5   1 1287.27   48.00
   6   5  -1 1296.87  163.28
   5  -5  -1 1751.52  110.39
  -5  -5   1 1599.64   71.99
   5   5  -1 1738.33  175.68
   5   5  -1 1364.96  199.08
   5   5  -1 1581.54  111.99
  -4  -5   1  172.28   19.90
   4  -5  -1  206.58   13.90
   4  -5  -1  179.38   29.10
  -4  -5   1  197.18   14.20
   4   5  -1  165.58   50.89
   4   5  -1   90.49   52.59
   4   5  -1  167.38   39.30
  -3  -5   1  315.47   19.50
   3  -5  -1  303.67   37.30
   3  -5  -1  325.77   18.90
   3   5  -1  277.87   70.89
   3   5  -1  367.66   93.39
   3   5  -1  307.07   40.40
  -2  -5   1 1010.40   56.79
  -2  -5   1  892.81   41.50
   2  -5  -1  941.61   41.70
   2  -5  -1 1043.10   69.59
   2   5  -1  840.72  111.09
   2   5  -1 1011.40   73.49
   2   5  -1 1006.40  105.19
  -1  -5   1  460.05   38.80
   1  -5  -1  553.54   45.30
  -1  -5   1  557.04   34.20
   1   5  -1  515.65   73.59
   1   5  -1  506.15   70.19
  -1   5   1  549.85   54.19
   1   5  -1  521.45   48.30
  -1   5   1  551.54   74.09
   0  -5   1 1062.49   53.59
   0  -5  -1 1111.79   66.39
   0  -5   1 1193.68   69.19
   0   5  -1  973.80   85.69
   0   5   1  963.80   93.89
   0   5  -1 1107.49   72.79
   0   5   1 1167.18   95.39
   0   5  -1  962.10   88.19
   1  -5   1 5476.05  202.78
  -1  -5  -1 5269.17  218.18
   1  -5   1 5849.11  230.78
  -1   5  -1 5476.65  229.28
  -1   5  -1 5395.06  247.58
   1   5   1 5708.73  231.58
   1   5   1 4572.44  291.27
   1   5   1 5808.62  285.37
  -2  -5  -1  909.51   58.49
   2  -5   1  947.21   49.70
  -2  -5  -1  988.20   42.10
   2  -5   1 1054.49   73.19
   2   5   1  734.23  108.99
   2   5   1  833.72   89.09
   2   5   1  946.01   67.39
   3  -5   1 4224.68  163.88
  -3  -5  -1 4391.16  150.68
   3  -5   1 4206.78  199.78
  -3  -5  -1 4130.49  173.98
   3   5   1 3987.00  246.68
   3   5   1 4250.57  189.98
   3   5   1 3553.14  294.27
   4  -5   1  637.74   62.39
   4  -5   1  555.94   40.20
  -4  -5  -1  539.95   42.60
  -4  -5  -1  526.75   28.40
   4   5   1  557.04   52.69
   4   5   1  551.74   86.79
   4   5   1  411.46   93.19
  -5  -5  -1 2011.30   73.99
  -5  -5  -1 1791.62   74.79
   5  -5   1 1733.33   92.39
   5  -5   1 1837.52  126.89
   5   5   1 1443.46  208.58
   5   5   1 1976.10  113.39
  -5   5  -1 2003.20   79.29
   5   5   1 1840.52  171.48
  -6  -5  -1  703.13   36.30
   6  -5   1  673.13   73.59
  -6  -5  -1  730.23   32.80
   6  -5   1  802.02   56.99
  -6  -5  -1  762.42   32.20
  -6  -5  -1  764.72   31.30
  -6  -5  -1  692.53   30.00
  -6  -5  -1  754.42   31.70
  -6  -5  -1  797.82   35.70
  -6  -5  -1  745.73   31.20
  -6  -5  -1  771.92   32.40
  -6  -5  -1  763.02   32.20
  -6   5  -1  793.42   37.00
   6   5   1  680.83   49.90
  -6   5  -1  755.22   33.80
  -6   5  -1  789.32   40.40
  -6   5  -1  771.62   37.90
  -6   5  -1  794.92   37.20
  -6   5  -1  732.33   38.10
  -6   5  -1  786.22   37.20
  -6   5  -1  740.23   33.90
   6   5   1  570.84  136.79
  -6   5  -1  732.73   35.60
  -6   5  -1  799.02   37.00
  -6   5  -1  751.72   30.50
  -6   5  -1  804.32   36.70
  -6   5  -1  774.82   37.20
   6   5   1  890.01  123.29
  -6   5  -1  748.23   37.20
  -6   5  -1  817.92   34.00
  -6   5  -1  770.52   43.00
  -6   5  -1  758.42   32.40
  -7  -5  -1  875.21   37.20
  -7  -5  -1  904.01   45.90
  -7  -5  -1  870.31   38.40
  -7  -5  -1  827.42   36.70
   7  -5   1  807.42   83.39
  -7  -5  -1  868.81   35.30
  -7  -5  -1  856.41   42.00
  -7  -5  -1  745.43   39.30
  -7  -5  -1  852.81   35.30
  -7   5  -1  848.62   41.00
  -7   5  -1  847.22   34.20
  -7   5  -1  882.31   42.10
  -7   5  -1  822.92   43.70
  -7   5  -1  890.71   36.50
  -7   5  -1  863.11   48.70
  -7   5  -1  894.71   38.40
  -7   5  -1  976.10   57.59
  -7   5  -1  854.51   51.59
   7   5   1  702.83   50.99
  -7   5  -1  780.42   35.20
  -7   5  -1  888.91   53.89
  -7   5  -1  785.52   48.20
   7   5   1  615.74  153.88
  -8  -5  -1  218.08   13.10
  -8  -5  -1  216.28   13.70
  -8  -5  -1  205.18   13.80
  -8  -5  -1  209.18   13.40
  -8  -5  -1  206.58   14.60
  -8  -5  -1  203.18   12.70
  -8  -5  -1  200.48   13.80
  -8  -5  -1  200.18   15.90
  -8  -5  -1  204.98   12.90
  -8   5  -1  209.18   16.50
   8   5   1  172.08   23.50
  -8   5  -1  218.18   12.70
  -8   5  -1  206.18   12.80
  -8   5  -1  188.98   12.90
  -8   5  -1  223.38   16.90
  -8   5  -1  204.18   16.30
  -8   5  -1  223.28   17.60
  -8   5  -1  213.78   18.00
  -8   5  -1  225.98   15.30
  -8   5  -1  221.68   16.50
  -8   5  -1  197.98   18.00
  -8   5  -1  215.08   16.90
  -8   5  -1  214.38   15.00
  -8   5  -1  207.78   17.90
  -8   5  -1  189.78   19.90
  -8   5  -1  204.08   17.00
  -9  -5  -1  207.28   12.50
  -9  -5  -1  200.08   15.60
  -9  -5  -1  194.78   12.50
  -9  -5  -1  212.88   12.50
  -9  -5  -1  211.48   14.40
  -9  -5  -1  228.78   14.20
  -9  -5  -1  209.98   13.80
  -9  -5  -1  195.18   13.30
  -9   5  -1  208.18   14.90
  -9   5  -1  192.18   12.30
  -9   5  -1  234.38   18.30
  -9   5  -1  197.58   16.60
  -9   5  -1  233.68   21.70
  -9   5  -1  197.68   16.50
  -9   5  -1  212.98   16.30
  -9   5  -1  210.08   14.00
  -9   5  -1  210.78   15.70
  -9   5  -1  212.48   15.80
  -9   5  -1  219.78   17.50
  -9   5  -1  207.88   15.90
 -10  -5  -1  129.29   11.40
 -10  -5  -1  143.89    9.50
 -10  -5  -1  136.29   10.00
 -10  -5  -1  134.29    9.80
 -10  -5  -1  122.69    7.90
 -10  -5  -1  137.69    9.50
 -10  -5  -1  144.59    9.20
 -10   5  -1  156.58   14.20
 -10   5  -1  134.89   12.90
 -10   5  -1  131.69   11.80
 -10   5  -1  121.89    9.90
 -10   5  -1  103.79   16.30
 -10   5  -1  143.39   12.00
 -10   5  -1  138.09   13.40
 -10   5  -1  123.29   11.10
 -11  -5  -1    0.50    1.30
 -11  -5  -1    1.60    1.60
 -11  -5  -1    1.30    1.20
 -11  -5  -1    3.10    1.60
 -11   5  -1    6.60    6.10
 -11  -6   1  116.29    8.80
 -11  -6   1  157.98    8.10
 -11  -6   1  153.38    7.80
 -11  -6   1  113.59    7.60
 -10  -6   1  177.88   12.20
 -10  -6   1  145.69    9.90
 -10  -6   1  149.99    9.80
 -10  -6   1  159.28   11.80
 -10  -6   1  176.88    9.80
 -10  -6   1  166.08   10.20
 -10   6   1  166.28   15.30
 -10   6   1  143.49   10.70
 -10   6   1  193.68   28.30
 -10   6   1  140.59   12.40
 -10   6   1  184.28   16.60
 -10   6   1  176.98   11.10
 -10   6   1  166.88   10.60
  -9  -6   1  118.69   10.90
  -9  -6   1  108.79    8.90
  -9  -6   1  115.99    8.30
  -9  -6   1  113.99    9.10
  -9  -6   1  118.59    9.10
  -9  -6   1  120.09    8.90
  -9  -6   1  109.69    8.50
  -9  -6   1  117.29    9.40
  -9   6   1  146.09   16.00
  -9   6   1  115.59    9.80
  -9   6   1  110.59    7.90
  -9   6   1  104.49    8.70
  -9   6   1  127.19   15.30
  -9   6   1  117.69    9.10
  -9   6   1  109.59    8.60
  -9   6   1  110.19   13.40
  -9   6   1  150.98   17.70
  -9   6   1  115.49   12.20
   9   6  -1  103.89   18.40
  -9   6   1  111.19   15.90
  -8  -6   1   75.59    7.40
  -8  -6   1   71.09    8.40
  -8  -6   1   68.39    6.80
  -8  -6   1   72.69    7.20
  -8  -6   1   64.39    6.90
  -8  -6   1   62.79    6.20
  -8  -6   1   67.29    6.70
  -8  -6   1   65.79    6.20
  -8  -6   1   64.69    7.20
  -8   6   1   72.79   10.60
  -8   6   1   84.89   12.80
  -8   6   1   73.29   10.40
  -8   6   1   74.89   12.60
  -8   6   1   62.59    5.80
  -8   6   1   67.89   10.60
  -8   6   1   70.79    7.30
  -8   6   1   73.09    9.50
  -8   6   1  109.69   14.60
  -8   6   1   99.89   14.70
  -8   6   1   67.29    7.60
   8   6  -1   77.49   17.20
  -8   6   1   79.69    7.50
  -8   6   1   67.59    7.10
  -8   6   1   86.89   13.20
  -7  -6   1  150.88   13.40
  -7  -6   1  165.48   11.30
  -7  -6   1  168.88   10.90
  -7  -6   1  173.68   13.50
   7  -6  -1  273.87   42.50
  -7  -6   1  173.58   10.90
  -7  -6   1  181.08   11.80
  -7  -6   1  174.68   11.40
  -7  -6   1  164.28   12.00
  -7  -6   1  172.28   10.90
  -7   6   1  193.98   15.80
  -7   6   1  169.98   12.00
  -7   6   1  158.18   11.50
  -7   6   1  177.48   12.90
  -7   6   1  153.78   11.20
  -7   6   1  176.78   16.50
  -7   6   1  171.98   18.80
  -7   6   1  166.98   14.60
   7   6  -1  175.58   99.49
  -7   6   1  187.38   15.80
  -7   6   1  180.58   17.10
  -7   6   1  170.68   15.50
  -7   6   1  176.88   15.30
  -7   6   1  175.08   16.30
  -7   6   1  166.28   16.90
  -7   6   1  179.18   13.00
  -7   6   1  171.48   17.20
  -6  -6   1 2874.11  106.19
  -6  -6   1 2948.61  105.19
  -6  -6   1 2963.90  106.19
  -6  -6   1 2977.20  106.99
  -6  -6   1 3108.49  110.29
  -6  -6   1 2868.81  104.99
  -6  -6   1 2907.71  112.09
  -6   6   1 2933.81  111.69
  -6   6   1 3043.10  114.29
  -6   6   1 3063.09  111.79
  -6   6   1 2935.21  109.59
  -6   6   1 3009.90  109.59
  -6   6   1 3021.40  114.89
   6   6  -1 2473.75  241.98
  -6   6   1 2850.51  110.99
  -6   6   1 2978.00  113.69
  -6   6   1 3041.90  121.89
   6   6  -1 2665.13  128.29
  -6   6   1 3130.79  114.99
  -6   6   1 3043.10  109.09
  -6   6   1 3151.58  114.69
  -6   6   1 2847.92  107.09
   6   6  -1 3055.59  179.38
  -6   6   1 3129.09  113.39
  -6   6   1 2942.61  104.09
  -6   6   1 3000.90  107.69
  -5  -6   1 1761.42   74.19
  -5  -6   1 2063.69   71.29
   5  -6  -1 1778.32  119.89
  -5  -6   1 1707.83   65.59
  -5  -6   1 1877.11   70.09
  -5   6   1 1781.42   72.09
  -5   6   1 1854.21   73.59
  -5   6   1 1905.41   74.09
  -5   6   1 2107.19   82.39
  -5   6   1 1726.63   71.29
  -5   6   1 1789.72   68.09
  -5   6   1 1988.50   80.39
  -5   6   1 1703.03   67.99
  -5   6   1 1790.62   70.09
  -5   6   1 1874.71   73.99
  -5   6   1 1712.43   71.49
   5   6  -1 1833.52  187.08
   5   6  -1 1371.06  211.98
   5   6  -1 1847.52  125.09
  -5   6   1 1779.12   70.49
  -5   6   1 1750.92   73.29
   4  -6  -1  472.15   51.59
  -4  -6   1  411.66   34.20
  -4  -6   1  409.26   20.30
  -4  -6   1  401.56   24.50
   4   6  -1  295.47  110.39
   4   6  -1  478.65   86.19
   4   6  -1  371.96   50.29
  -3  -6   1  556.54   28.90
   3  -6  -1  480.85   26.00
  -3  -6   1  537.25   40.80
  -3  -6   1  478.35   23.10
   3  -6  -1  464.35   70.99
   3   6  -1  462.05   82.29
   3   6  -1  378.06   89.69
   3   6  -1  538.55   57.99
   2  -6  -1 1195.68   82.09
  -2  -6   1 1326.27   73.89
  -2  -6   1 1261.97   53.69
   2   6  -1  992.20  130.79
   2   6  -1 1222.58  122.39
   2   6  -1 1235.68   89.69
  -1  -6   1  435.66   31.70
   1  -6  -1  453.55   43.50
  -1  -6   1  461.55   40.70
  -1  -6   1  475.65   30.50
   1   6  -1  405.46   46.50
   1   6  -1  338.67   70.29
  -1   6   1  369.66   53.39
   1   6  -1  390.96   61.79
  -1   6   1  465.95   51.09
   0  -6  -1 1243.68   77.79
   0  -6  -1 1199.48   52.89
   0  -6   1 1252.07   62.49
   0  -6   1 1302.77   54.19
   0  -6   1 1228.78   79.49
   0   6  -1 1285.87  107.69
   0   6   1 1162.98  110.79
   0   6  -1 1100.09  100.89
   0   6   1 1302.37  110.99
   0   6  -1 1354.86   90.19
  -1  -6  -1  526.15   27.80
  -1  -6  -1  547.55   46.10
   1  -6   1  493.25   33.80
   1  -6   1  540.05   50.39
  -1   6  -1  483.95   59.09
   1   6   1  507.45   69.79
   1   6   1  464.45   80.69
  -2  -6  -1 4964.90  194.98
  -2  -6  -1 4355.66  153.98
   2  -6   1 4401.16  171.68
   2  -6   1 4375.56  206.08
  -2  -6  -1 4250.47  159.68
   2   6   1 4521.95  261.77
   2   6   1 4453.65  205.68
   2   6   1 3695.43  287.37
   3  -6   1  612.24   40.10
   3  -6   1  547.45   58.19
  -3  -6  -1  594.04   31.60
  -3  -6  -1  585.44   26.80
  -3  -6  -1  598.84   47.80
   3   6   1  672.83   60.09
   3   6   1  559.74   84.09
   3   6   1  566.64  111.59
  -4  -6  -1  110.09   18.50
   4  -6   1  100.69   15.50
   4  -6   1   63.49   20.00
  -4  -6  -1   93.69   10.50
   4   6   1   81.69   37.70
   4   6   1   80.19   48.10
   4   6   1  117.49   30.70
  -5  -6  -1 1125.79   45.30
  -5  -6  -1 1119.89   44.90
  -5  -6  -1 1214.38   46.70
  -5  -6  -1 1150.58   53.59
   5  -6   1 1215.38  100.89
  -5  -6  -1 1149.58   48.80
  -5  -6  -1 1136.09   44.70
   5  -6   1 1211.48   69.39
  -5   6  -1 1182.38   51.19
  -5   6  -1 1281.07   58.09
  -5   6  -1 1294.77   55.39
  -5   6  -1 1230.38   51.49
   5   6   1 1109.99  183.68
  -5   6  -1 1214.08   51.39
   5   6   1 1125.79   66.69
  -5   6  -1 1151.78   52.69
  -5   6  -1 1171.78   46.70
  -5   6  -1 1186.88   51.99
   5   6   1 1263.27  142.29
  -5   6  -1 1223.38   48.60
  -5   6  -1 1212.68   51.49
  -6  -6  -1   71.99    6.50
  -6  -6  -1   72.69    7.00
   6  -6   1   67.59   26.80
  -6  -6  -1   80.69    6.90
  -6  -6  -1   69.19    6.20
  -6  -6  -1   75.39    6.90
  -6  -6  -1   72.29    6.80
  -6  -6  -1   76.69    9.80
  -6  -6  -1   72.39    8.10
   6   6   1   79.19   17.60
  -6   6  -1   81.59   11.70
  -6   6  -1   74.89    8.60
  -6   6  -1   63.89    8.70
  -6   6  -1   92.29   11.40
  -6   6  -1   75.99    8.90
  -6   6  -1   76.19    7.10
  -6   6  -1   55.89    6.50
  -6   6  -1   75.59    9.20
  -6   6  -1   78.39   12.10
  -6   6  -1   76.09    9.20
  -6   6  -1   91.79    9.90
   6   6   1   49.40   52.39
  -6   6  -1   63.69    7.00
  -6   6  -1   68.89    7.90
  -6   6  -1   71.99   11.30
  -6   6  -1   80.49    8.40
  -7  -6  -1  603.24   30.60
  -7  -6  -1  606.44   29.00
  -7  -6  -1  615.94   27.50
  -7  -6  -1  609.54   27.60
  -7  -6  -1  579.14   26.20
   7  -6   1  631.84   74.79
  -7  -6  -1  599.84   27.50
  -7  -6  -1  572.74   26.10
  -7  -6  -1  589.94   26.30
  -7  -6  -1  563.64   27.50
   7   6   1  372.26  151.28
  -7   6  -1  594.24   29.50
  -7   6  -1  581.54   26.90
  -7   6  -1  559.84   32.40
  -7   6  -1  617.74   34.90
   7   6   1  528.45   43.40
  -7   6  -1  582.24   28.30
  -7   6  -1  605.34   32.30
  -7   6  -1  603.54   32.10
  -7   6  -1  582.04   32.70
  -7   6  -1  617.94   32.90
  -7   6  -1  559.44   26.40
  -7   6  -1  606.14   38.60
  -7   6  -1  586.44   31.80
  -7   6  -1  600.64   31.90
  -8  -6  -1  310.87   20.40
  -8  -6  -1  313.07   17.70
  -8  -6  -1  323.37   19.30
  -8  -6  -1  318.77   16.80
  -8  -6  -1  323.87   17.50
  -8  -6  -1  335.67   17.10
  -8  -6  -1  326.67   18.00
  -8  -6  -1  301.07   17.80
  -8   6  -1  317.07   20.20
  -8   6  -1  330.57   21.90
  -8   6  -1  354.26   27.80
  -8   6  -1  332.97   26.70
  -8   6  -1  318.37   22.20
  -8   6  -1  347.77   22.10
  -8   6  -1  321.87   22.00
  -8   6  -1  349.96   23.20
  -8   6  -1  327.27   17.30
  -8   6  -1  311.77   21.10
  -8   6  -1  343.27   21.80
  -8   6  -1  324.37   23.50
  -9  -6  -1  138.59   12.30
  -9  -6  -1  152.98   11.40
  -9  -6  -1  142.89    9.10
  -9  -6  -1  139.79    9.50
  -9  -6  -1  151.18   11.30
  -9  -6  -1  137.99   10.20
  -9  -6  -1  140.59    9.60
  -9   6  -1  151.58   13.90
  -9   6  -1  155.18   15.50
  -9   6  -1  149.59   13.70
  -9   6  -1  139.29   15.70
   9   6   1  121.99   16.10
  -9   6  -1  135.89   10.60
  -9   6  -1  138.29    9.50
  -9   6  -1  167.58   15.30
  -9   6  -1  153.68   13.10
  -9   6  -1  144.59   13.30
  -9   6  -1  150.98   16.60
 -10  -6  -1   47.50    5.20
 -10  -6  -1   45.40    4.50
 -10  -6  -1   41.20    4.80
 -10  -6  -1   39.30    3.80
 -10  -6  -1   45.00    4.40
 -10  -6  -1   46.90    4.80
 -10  -6  -1   42.80    5.90
 -10   6  -1   69.09   10.90
 -10   6  -1   48.10    7.90
 -10   6  -1   30.50    9.40
 -10   6  -1   62.09    9.80
 -10   6  -1   63.89    9.80
 -10   6  -1   45.30    6.60
 -11  -6  -1    6.60    1.60
 -11  -6  -1   11.90    3.00
 -11   6  -1    7.60    4.70
 -11  -7   1   35.30    4.30
 -11  -7   1   37.40    3.40
 -11  -7   1   38.40    3.30
 -10  -7   1   37.30    4.10
 -10  -7   1   42.80    4.00
 -10  -7   1   34.90    4.20
 -10  -7   1   38.50    4.10
 -10  -7   1   43.30    5.50
 -10  -7   1   27.90    4.70
 -10   7   1   36.50    8.80
 -10   7   1   42.50    5.70
 -10   7   1   38.70    4.90
 -10   7   1   58.99   11.20
 -10   7   1   39.50    7.20
 -10   7   1   67.49   14.00
  -9  -7   1  190.28   10.70
  -9  -7   1  175.28   11.30
  -9  -7   1  197.28   13.80
  -9  -7   1  170.28   10.90
  -9  -7   1  174.48   11.40
  -9  -7   1  192.98   12.00
  -9  -7   1  189.48   11.20
  -9   7   1  194.18   11.60
  -9   7   1  162.18   10.50
  -9   7   1  150.08   14.50
  -9   7   1  182.08   11.10
  -9   7   1  203.18   18.90
  -9   7   1  199.98   18.30
  -9   7   1  174.58   14.80
   9   7  -1  152.88   20.50
  -9   7   1  162.58   18.70
  -9   7   1  196.28   17.40
  -9   7   1  209.68   19.10
  -8  -7   1  310.87   16.70
  -8  -7   1  307.57   15.70
  -8  -7   1  334.47   18.60
  -8  -7   1  305.17   17.60
  -8  -7   1  282.17   21.50
  -8  -7   1  249.28   23.70
  -8   7   1  334.67   31.90
  -8   7   1  300.17   24.10
  -8   7   1  318.57   17.70
  -8   7   1  236.38   27.30
  -8   7   1  352.06   31.60
   8   7  -1  293.17   29.50
  -8   7   1  317.17   17.40
  -8   7   1  304.07   15.00
  -8   7   1  333.77   29.00
  -8   7   1  360.46   33.50
  -8   7   1  315.57   17.50
  -8   7   1  312.47   24.00
  -7  -7   1  574.84   27.20
  -7  -7   1  603.94   26.60
  -7  -7   1  571.44   25.80
  -7  -7   1  650.43   31.00
  -7  -7   1  616.04   27.60
  -7  -7   1  604.44   27.30
  -7  -7   1  605.34   27.60
  -7  -7   1  579.34   29.40
  -7   7   1  640.64   34.30
  -7   7   1  574.64   38.20
  -7   7   1  618.74   29.00
  -7   7   1  613.84   25.10
  -7   7   1  600.44   33.70
  -7   7   1  580.54   31.40
   7   7  -1  610.54   46.20
  -7   7   1  635.94   33.50
  -7   7   1  585.74   35.10
  -7   7   1  598.44   29.40
  -7   7   1  621.84   35.40
  -7   7   1  607.54   27.90
  -7   7   1  607.04   35.20
  -7   7   1  620.54   28.40
  -6  -7   1  891.71   42.90
  -6  -7   1  876.11   35.20
   6  -7  -1  934.21   86.59
  -6  -7   1  893.71   36.20
  -6  -7   1  836.12   34.80
  -6  -7   1  847.02   36.00
  -6  -7   1  868.31   36.30
  -6  -7   1  909.21   39.50
  -6   7   1  847.72   38.80
  -6   7   1  825.52   36.70
  -6   7   1  876.01   43.70
  -6   7   1  900.51   42.30
  -6   7   1  953.50   44.10
  -6   7   1  946.11   49.90
   6   7  -1  695.83  163.78
  -6   7   1  906.41   43.70
  -6   7   1  818.52   34.60
  -6   7   1  813.32   44.20
  -6   7   1  845.02   39.80
  -6   7   1  874.41   37.30
   6   7  -1  817.92   56.89
  -6   7   1  885.41   43.10
  -6   7   1  904.11   38.10
   6   7  -1  914.71   92.29
  -5  -7   1  177.08   10.10
  -5  -7   1  159.08   10.10
  -5  -7   1  170.68   10.70
  -5  -7   1  163.48   12.00
  -5  -7   1  171.68   15.80
  -5   7   1  188.98   12.70
   5   7  -1  141.39   90.29
   5   7  -1  153.88   26.30
   5   7  -1  215.98   55.29
  -5   7   1  192.88   14.20
  -5   7   1  192.68   15.50
  -5   7   1  157.28   15.80
  -5   7   1  179.58   13.20
  -5   7   1  189.68   17.90
  -5   7   1  175.48   18.20
  -5   7   1  170.08   14.90
  -5   7   1  179.88   16.40
  -5   7   1  170.68   11.00
  -5   7   1  183.48   14.80
   5   7  -1  162.28   64.09
  -5   7   1  164.98   11.70
  -5   7   1  190.88   12.10
  -4  -7   1  477.05   23.70
  -4  -7   1  474.85   29.00
   4  -7  -1  490.65   56.39
  -4  -7   1  467.45   41.10
  -4   7   1  458.35   27.50
   4   7  -1  429.06   36.10
   4   7  -1  637.44   97.79
   4   7  -1  400.56   55.29
  -4   7   1  510.65   27.40
  -4   7   1  460.85   22.50
   4   7  -1  466.15  110.29
  -4   7   1  469.05   24.40
  -4   7   1  513.75   28.00
  -4   7   1  476.25   26.30
  -4   7   1  520.65   30.60
  -3  -7   1  190.48   12.20
   3  -7  -1  200.18   32.50
  -3  -7   1  186.18   16.40
  -3  -7   1  138.49   23.90
   3   7  -1  165.18   40.80
   3   7  -1  145.89   60.59
   3   7  -1  147.39   57.79
  -2  -7   1   39.20    6.40
   2  -7  -1   41.10    6.50
  -2  -7   1   24.60   13.20
  -2  -7   1   43.10   10.00
   2  -7  -1   58.39   22.50
   2   7  -1   49.99   17.70
   2   7  -1   31.70   35.80
   2   7  -1   50.59   38.10
   1  -7  -1 1106.79   81.49
  -1  -7   1 1099.49   76.69
   1  -7  -1 1181.88   49.00
  -1  -7   1 1191.88   53.69
   1  -7  -1 1286.97   58.89
   1   7  -1 1200.38   93.09
  -1   7   1 1181.58  110.49
   1   7  -1 1144.79  120.69
   0  -7  -1 1103.59   50.79
   0  -7   1 1144.99   80.39
   0  -7   1 1189.68   62.29
   0  -7  -1 1130.99   48.90
   0  -7   1 1134.29   51.49
   0   7   1 1102.09  111.29
   0   7  -1 1023.40  106.09
   0   7   1 1126.59  113.59
   0   7  -1 1201.48   90.79
   0   7  -1  988.40   92.19
  -1  -7  -1   97.79   11.00
  -1  -7  -1  112.29   39.40
   1  -7   1  108.89   16.40
   1  -7   1  150.88   36.60
  -1  -7  -1  100.59    8.70
  -1   7  -1  129.09   42.10
   1   7   1   80.09   44.10
   1   7   1  176.28   58.29
  -2  -7  -1  311.97   37.20
   2  -7   1  329.07   28.60
  -2  -7  -1  358.36   18.90
  -2  -7  -1  313.07   22.30
   2  -7   1  363.16   23.80
   2  -7   1  376.76   48.30
   2   7   1  367.86   93.39
   2   7   1  354.16   69.69
   3  -7   1 1204.28   94.19
  -3  -7  -1 1112.49   52.49
  -3  -7  -1 1147.59   46.10
   3  -7   1 1097.09   60.79
  -3  -7  -1 1132.19   75.49
   3   7   1  971.40  150.08
   3   7   1 1067.49  123.69
   4  -7   1  262.47   29.20
  -4  -7  -1  266.97   20.60
   4  -7   1  230.08   41.90
  -4  -7  -1  290.67   35.70
  -4   7  -1  301.07   22.40
  -4   7  -1  279.37   18.20
  -4   7  -1  282.77   19.00
  -4   7  -1  276.97   17.90
  -4   7  -1  243.38   17.00
  -4   7  -1  289.27   21.70
  -4   7  -1  262.47   14.90
  -4   7  -1  279.57   17.50
   4   7   1  307.97   96.19
   4   7   1  280.37   28.30
   4   7   1  274.57   94.79
  -5  -7  -1  172.28   10.50
  -5  -7  -1  190.18   12.70
  -5  -7  -1  178.08   16.40
  -5  -7  -1  173.28   10.00
  -5  -7  -1  174.18   10.80
  -5  -7  -1  165.38   10.30
   5  -7   1  223.88   52.79
   5   7   1  159.98   74.19
  -5   7  -1  160.18   11.10
  -5   7  -1  176.88   17.40
  -5   7  -1  186.38   17.80
  -5   7  -1  158.78   13.90
   5   7   1  158.88   26.00
  -5   7  -1  175.58   14.00
  -5   7  -1  176.38   13.80
  -5   7  -1  172.98   14.20
  -5   7  -1  155.28   10.90
  -5   7  -1  173.68   12.90
  -5   7  -1  168.68   15.00
  -5   7  -1  169.38   14.30
  -6  -7  -1 1278.47   52.39
  -6  -7  -1 1261.97   48.30
  -6  -7  -1 1252.67   48.90
   6  -7   1 1209.08  108.99
  -6  -7  -1 1251.17   48.70
  -6  -7  -1 1191.98   47.60
  -6  -7  -1 1285.77   49.70
  -6  -7  -1 1146.59   55.79
   6   7   1 1229.78  207.88
  -6   7  -1 1162.08   53.39
  -6   7  -1 1259.77   54.99
  -6   7  -1 1205.48   49.90
  -6   7  -1 1264.37   53.99
  -6   7  -1 1265.27   58.39
  -6   7  -1 1172.68   49.60
  -6   7  -1 1169.38   48.00
  -6   7  -1 1263.87   55.99
  -6   7  -1 1201.58   59.69
  -6   7  -1 1264.07   61.79
  -7  -7  -1   87.39    7.30
  -7  -7  -1   88.49    7.40
  -7  -7  -1   86.79    8.50
  -7  -7  -1   96.69    7.50
  -7  -7  -1   91.09    9.20
  -7  -7  -1   87.59    7.90
  -7  -7  -1   84.69    7.80
  -7  -7  -1   63.99   10.40
  -7   7  -1   76.79    7.30
  -7   7  -1   81.59   10.70
  -7   7  -1   82.49   10.20
  -7   7  -1   87.99   14.10
  -7   7  -1   94.79   10.80
  -7   7  -1   94.29   13.60
  -7   7  -1   86.89    8.50
  -7   7  -1   95.09   12.30
  -7   7  -1   81.49    7.60
  -7   7  -1  105.89   13.60
  -7   7  -1   85.89   10.00
   7   7   1  104.39   19.30
  -8  -7  -1  225.78   13.80
  -8  -7  -1  226.78   14.90
  -8  -7  -1  221.78   15.80
  -8  -7  -1  210.88   12.20
  -8  -7  -1  218.78   12.60
  -8  -7  -1  227.98   14.00
  -8  -7  -1  217.78   12.70
  -8   7  -1  228.68   13.10
  -8   7  -1  230.58   21.10
   8   7   1  185.88   22.50
  -8   7  -1  218.58   16.50
  -8   7  -1  219.08   20.80
  -8   7  -1  202.28   16.30
  -8   7  -1  230.98   18.60
  -8   7  -1  245.98   17.40
  -8   7  -1  211.88   12.70
  -8   7  -1  227.18   18.30
  -8   7  -1  229.48   17.50
  -9  -7  -1  158.48    8.90
  -9  -7  -1  163.08    9.80
  -9  -7  -1  176.38   11.60
  -9  -7  -1  151.48   10.40
  -9  -7  -1  157.58   10.90
  -9  -7  -1  141.19   11.70
  -9   7  -1  197.68   16.60
  -9   7  -1  124.19   10.40
  -9   7  -1  164.48   14.10
  -9   7  -1  166.48   16.70
   9   7   1  147.99   17.00
  -9   7  -1  172.88   15.80
  -9   7  -1  146.09   11.90
  -9   7  -1  165.18   13.10
  -9   7  -1  158.18   13.50
 -10  -7  -1  233.68   12.50
 -10  -7  -1  273.27   13.70
 -10  -7  -1  238.98   11.60
 -10  -7  -1  257.57   14.70
 -10  -7  -1  265.77   14.30
 -10   7  -1  263.47   16.80
 -10   7  -1  232.68   11.80
 -10   7  -1  234.18   16.30
 -10   7  -1  283.87   16.90
 -10   7  -1  261.77   15.80
 -10  -8   1   96.49    7.30
 -10  -8   1  101.99    7.40
 -10  -8   1   72.39    6.00
 -10  -8   1   99.99    6.80
 -10   8   1  115.29   11.80
 -10   8   1   99.39    7.30
 -10   8   1   63.59   12.60
 -10   8   1   80.49    8.30
  -9  -8   1    9.00    2.60
  -9  -8   1    5.00    2.20
  -9  -8   1    5.50    2.20
  -9  -8   1    9.90    3.20
  -9  -8   1    7.50    1.90
  -9  -8   1    7.70    2.50
  -9   8   1   26.70    9.40
  -9   8   1   29.50    9.70
  -9   8   1    9.30    2.60
  -9   8   1    6.10    2.70
   9   8  -1    4.20    6.30
  -9   8   1    8.70    5.50
  -9   8   1    7.70    2.40
  -9   8   1    7.00    2.60
  -8  -8   1  209.98   13.10
  -8  -8   1  221.68   12.80
  -8  -8   1  228.68   13.60
  -8  -8   1  218.58   12.10
  -8  -8   1  233.58   15.40
  -8  -8   1  231.28   14.00
  -8   8   1  249.08   18.30
  -8   8   1  241.68   13.50
  -8   8   1  223.98   13.50
   8   8  -1  237.08   24.50
  -8   8   1  256.27   22.40
  -8   8   1  215.78   21.30
  -8   8   1  227.88   19.30
  -8   8   1  211.88   20.50
  -8   8   1  221.78   13.20
  -8   8   1  238.48   13.90
  -8   8   1  247.98   20.10
  -7  -8   1  208.08   12.60
  -7  -8   1  198.28   14.20
  -7  -8   1  199.28   11.80
  -7  -8   1  191.78   11.10
  -7  -8   1  189.98   12.30
  -7   8   1  183.88   13.30
  -7   8   1  196.58   12.50
  -7   8   1  206.78   18.50
   7   8  -1  187.98   24.70
  -7   8   1  195.18   12.90
  -7   8   1  201.78   14.60
  -7   8   1  227.48   21.80
  -7   8   1  189.58   16.50
  -7   8   1  193.28   20.50
  -7   8   1  172.78   16.10
  -7   8   1  188.78   19.60
   6  -8  -1  507.45   65.69
  -6  -8   1  464.95   22.00
  -6  -8   1  484.45   22.60
  -6  -8   1  533.25   26.60
   6  -8  -1  506.95   26.30
  -6  -8   1  501.25   23.70
  -6  -8   1  494.95   30.10
  -6   8   1  526.75   29.20
   6   8  -1  489.45   41.00
  -6   8   1  556.94   31.30
  -6   8   1  554.04   35.70
  -6   8   1  510.95   24.80
  -6   8   1  520.65   25.00
  -6   8   1  516.15   30.10
  -6   8   1  496.35   31.30
  -6   8   1  485.35   24.20
  -6   8   1  516.05   32.70
   6   8  -1  671.13   79.39
  -6   8   1  515.15   26.40
   6   8  -1  464.85  150.18
  -5  -8   1  481.65   23.90
   5  -8  -1  440.86   61.69
  -5  -8   1  458.05   29.40
  -5  -8   1  448.36   20.30
  -5   8   1  463.85   31.00
  -5   8   1  420.36   20.30
  -5   8   1  463.65   30.00
   5   8  -1  491.35   65.19
  -5   8   1  450.75   27.20
  -5   8   1  441.26   24.50
  -5   8   1  439.86   22.30
  -5   8   1  469.75   27.80
   5   8  -1  297.47  117.09
  -5   8   1  457.85   22.80
  -5   8   1  458.15   25.90
  -5   8   1  397.46   27.40
   5   8  -1  484.35   39.40
  -4  -8   1  122.19   13.80
   4  -8  -1   89.59   10.90
   4  -8  -1  120.89   35.40
  -4  -8   1  134.09   11.20
  -4  -8   1  125.89   10.30
   4   8  -1   95.39   17.00
  -4   8   1   91.59   13.50
  -4   8   1  119.09   16.80
   4   8  -1   68.29   33.20
   4   8  -1  274.07   92.39
  -4   8   1  127.89   12.40
  -4   8   1  120.59    9.40
  -4   8   1  110.99   15.40
  -4   8   1  103.69    9.00
  -4   8   1  119.69    9.40
   4   8  -1  144.89   24.90
  -4   8   1  134.29   14.20
  -4   8   1  128.99   10.80
   4   8  -1  183.88   94.29
  -4   8   1  117.99   11.60
  -4   8   1  124.09   11.30
  -3  -8   1  581.64   51.19
   3  -8  -1  596.84   62.59
   3  -8  -1  561.64   27.90
  -3  -8   1  529.85   32.90
  -3  -8   1  554.74   27.10
  -3  -8   1  530.35   26.10
  -3   8   1  586.24   30.00
   3   8  -1  529.95   66.99
  -3   8   1  499.95   25.50
  -3   8   1  577.24   26.40
  -3   8   1  589.24   33.10
   3   8  -1  514.25   55.29
  -3   8   1  500.75   31.10
   3   8  -1  464.55  111.29
  -3   8   1  578.34   29.00
   3   8  -1  591.24   95.39
  -3   8   1  491.05   31.20
   2  -8  -1  575.24   60.39
  -2  -8   1  586.24   55.39
  -2  -8   1  596.84   28.80
   2  -8  -1  611.94   29.50
  -2  -8   1  626.74   35.40
   2  -8  -1  578.54   33.60
   2   8  -1  639.94   47.10
   2   8  -1  537.75   92.29
   2   8  -1  628.94   70.29
   1  -8  -1 2493.25  103.19
   1  -8  -1 2549.54  145.79
  -1  -8   1 2658.23  104.99
  -1  -8   1 2763.72   97.39
  -1  -8   1 2819.52  143.39
   1  -8  -1 2645.14   96.89
   1   8  -1 2618.74  203.68
   1   8  -1 2489.85  158.08
   1   8  -1 2176.58  193.08
   0  -8   1  243.98   25.10
   0  -8   1  223.38   19.00
   0  -8   1  185.98   32.80
   0  -8   1  216.38   15.20
   0  -8  -1  233.78   15.00
   0  -8  -1  211.68   18.60
   0  -8  -1  247.08   37.50
   0   8  -1  353.86   57.59
   0   8  -1  261.57   62.09
   0   8   1  234.58   55.59
   0   8   1  319.37   59.99
  -1  -8  -1  118.39   10.10
  -1  -8  -1  147.79   26.90
  -1  -8  -1  115.59   13.00
   1  -8   1  114.39   13.60
   1  -8   1  136.29   35.00
   1  -8   1  129.79   17.80
  -1   8  -1   92.59   39.30
   1   8   1  144.19   52.89
  -2  -8  -1  316.77   18.20
  -2  -8  -1  300.77   22.70
  -2  -8  -1  302.77   39.50
   2  -8   1  281.57   28.10
   2  -8   1  307.77   21.80
   2  -8   1  276.97   41.60
  -2  -8  -1  298.87   17.50
   2   8   1  283.77   28.50
   2   8   1  221.28   67.69
  -2   8  -1  275.57   20.90
   2   8   1  302.07   74.19
  -3  -8  -1  314.37   23.20
   3  -8   1  271.97   47.50
  -3  -8  -1  277.77   17.30
  -3  -8  -1  286.57   17.80
  -3  -8  -1  312.67   40.60
   3  -8   1  332.27   31.00
   3   8   1  184.58   82.69
   3   8   1  358.46   68.09
  -3   8  -1  322.47   19.60
  -3   8  -1  316.97   25.50
  -3   8  -1  278.47   20.90
  -3   8  -1  309.27   19.20
   3   8   1  340.47   32.00
  -4  -8  -1   55.19    8.90
   4  -8   1   57.09    8.30
   4  -8   1   64.89   23.50
  -4  -8  -1   53.99    4.70
  -4  -8  -1   51.09   22.00
  -4   8  -1   58.09   10.00
  -4   8  -1   60.49    6.90
   4   8   1   97.79   55.89
   4   8   1   79.39   38.60
  -4   8  -1   66.09    7.90
  -4   8  -1   57.19    7.10
  -4   8  -1   47.90    5.80
  -4   8  -1   60.99   10.20
  -4   8  -1   55.39    9.40
   4   8   1   38.60   13.20
  -4   8  -1   56.59    9.90
  -4   8  -1   50.29    7.40
   4   8   1   65.09   16.20
  -5  -8  -1  224.88   13.00
  -5  -8  -1  248.88   13.80
  -5  -8  -1  223.38   19.80
   5  -8   1  271.47   49.40
  -5  -8  -1  243.98   15.60
  -5  -8  -1  241.28   13.20
  -5  -8  -1  251.17   12.90
   5   8   1  236.88   95.79
  -5   8  -1  230.88   17.70
   5   8   1  204.38   28.20
  -5   8  -1  243.28   16.90
  -5   8  -1  234.28   14.40
  -5   8  -1  265.37   22.20
  -5   8  -1  216.08   17.20
  -5   8  -1  240.88   22.90
  -5   8  -1  227.58   15.60
  -5   8  -1  227.78   13.70
  -5   8  -1  240.98   17.70
  -5   8  -1  238.18   19.80
  -6  -8  -1  222.28   13.60
  -6  -8  -1  239.68   15.80
  -6  -8  -1  221.58   12.40
  -6  -8  -1  221.98   13.50
  -6  -8  -1  226.28   12.80
  -6  -8  -1  219.08   18.80
  -6  -8  -1  209.58   12.60
   6   8   1  205.18   27.30
  -6   8  -1  236.88   20.00
  -6   8  -1  260.17   23.40
  -6   8  -1  205.28   17.60
  -6   8  -1  220.78   13.80
  -6   8  -1  221.88   14.50
  -6   8  -1  216.68   12.90
  -6   8  -1  236.58   18.00
  -6   8  -1  214.68   17.50
  -6   8  -1  228.98   21.50
  -6   8  -1  229.38   16.50
  -7  -8  -1    3.00    2.20
  -7  -8  -1    0.20    1.50
  -7  -8  -1    4.10    2.80
  -7  -8  -1    4.30    1.70
  -7  -8  -1    2.70    1.80
  -7  -8  -1    3.90    1.80
  -7  -8  -1   -4.30    5.10
  -7   8  -1    2.50    1.70
  -7   8  -1    4.90    6.90
  -7   8  -1   27.90   11.00
  -7   8  -1    3.90    3.40
  -7   8  -1    3.40    2.10
  -7   8  -1    3.00    3.10
  -7   8  -1   15.80    6.90
  -7   8  -1    3.80    3.00
  -7   8  -1    5.80    2.90
  -7   8  -1    2.30    2.50
  -8  -8  -1  128.39    9.20
  -8  -8  -1  111.39    8.80
  -8  -8  -1  120.09    8.00
  -8  -8  -1  106.09    8.50
  -8  -8  -1  110.39    7.90
  -8  -8  -1  102.79    9.10
  -8  -8  -1  121.19   10.40
  -8   8  -1  117.29   14.20
  -8   8  -1  121.79   12.20
  -8   8  -1  101.89   10.30
   8   8   1  129.39   17.40
  -8   8  -1   95.89    8.10
  -8   8  -1  136.29   16.00
  -8   8  -1  109.39   14.90
  -8   8  -1  111.49   11.10
  -8   8  -1  106.29    8.00
  -9  -8  -1   49.10    5.20
  -9  -8  -1   48.40    4.90
  -9  -8  -1   43.20    5.50
  -9  -8  -1   36.60    4.40
  -9  -8  -1   40.90    4.00
  -9   8  -1   43.00    4.50
  -9   8  -1   34.80    6.20
  -9   8  -1   50.69   10.00
  -9   8  -1   43.80    8.40
  -9   8  -1   47.70    9.60
  -9   8  -1   35.50    7.50
  -9   8  -1   51.09    8.50
   9   8   1   30.20    7.10
 -10  -8  -1   31.60    3.30
 -10  -8  -1   48.20    3.90
 -10  -8  -1   46.10    4.10
 -10   8  -1   43.60    7.30
 -10   8  -1   34.40    7.20
 -10   8  -1   22.50    7.70
 -10  -9   1  127.89    6.30
 -10  -9   1  118.89    6.80
 -10   9   1  127.09    7.00
  -9  -9   1  297.57   15.00
  -9  -9   1  311.47   14.30
  -9  -9   1  290.47   14.50
  -9  -9   1  290.97   14.20
  -9  -9   1  295.67   15.80
  -9   9   1  348.07   15.00
  -9   9   1  285.97   17.90
  -9   9   1  336.27   23.00
  -9   9   1  313.97   13.90
  -9   9   1  300.67   20.80
  -9   9   1  339.17   20.80
  -8  -9   1   86.59    7.10
  -8  -9   1   80.89    5.90
  -8  -9   1   78.49    6.30
  -8  -9   1   78.99    7.70
  -8  -9   1   86.39    7.50
  -8  -9   1   83.99    7.00
  -8   9   1   78.79    6.80
  -8   9   1   77.09   11.40
   8   9  -1   65.19   13.30
  -8   9   1   76.89    6.90
  -8   9   1   84.09   13.30
  -8   9   1  115.99   15.20
  -8   9   1   79.79    9.60
  -7  -9   1  165.18    9.70
  -7  -9   1  151.58   11.70
  -7  -9   1  160.58   10.80
  -7  -9   1  159.08   10.00
  -7  -9   1  155.98   13.20
  -7  -9   1  161.78   10.80
  -7   9   1  156.98   11.00
   7   9  -1  135.79   21.40
  -7   9   1  172.18   12.00
  -7   9   1  161.08   17.20
  -7   9   1  163.58   15.90
  -7   9   1  162.18   10.70
  -7   9   1  216.88   22.00
  -7   9   1  184.98   18.20
  -7   9   1  142.69   14.00
  -6  -9   1   58.09    5.50
   6  -9  -1   59.29    6.90
  -6  -9   1   51.99    8.80
  -6  -9   1   57.89    5.90
  -6  -9   1   49.50    5.60
  -6  -9   1   50.19    6.30
  -6   9   1   45.40   10.90
  -6   9   1   63.39   14.20
  -6   9   1   52.19    8.20
  -6   9   1   53.49    6.80
  -6   9   1   52.99   10.60
   6   9  -1   25.30   13.30
  -6   9   1   49.40    9.60
  -6   9   1   50.99    6.20
  -6   9   1   45.00    5.90
   5  -9  -1  300.17   53.29
  -5  -9   1  352.66   25.60
   5  -9  -1  365.96   23.00
  -5  -9   1  362.16   17.20
  -5  -9   1  372.16   20.00
  -5   9   1  345.97   18.80
   5   9  -1  357.16  127.09
  -5   9   1  346.77   22.10
  -5   9   1  348.87   21.10
  -5   9   1  376.36   24.30
  -5   9   1  322.57   26.20
   5   9  -1  461.15   66.59
  -5   9   1  363.36   28.00
  -5   9   1  346.47   19.20
  -5   9   1  389.76   25.60
   5   9  -1  321.17   34.30
  -4  -9   1  116.99   10.70
   4  -9  -1  110.79   11.40
  -4  -9   1  145.19   10.60
  -4  -9   1  135.29   11.40
  -4  -9   1  135.59   15.20
   4  -9  -1  158.18   12.30
  -4   9   1  121.49   11.20
   4   9  -1  160.78   45.50
  -4   9   1  143.99   14.70
  -4   9   1  139.79   10.50
   4   9  -1  134.89   22.10
  -4   9   1  135.09   13.10
  -4   9   1  130.39    9.60
  -4   9   1  132.09   10.20
   4   9  -1   28.90   73.79
  -4   9   1  106.19   17.90
  -4   9   1  114.49   11.50
   4   9  -1   97.39   20.10
  -4   9   1   96.19   14.40
  -4   9   1  150.18   15.70
   3  -9  -1  125.29   11.00
  -3  -9   1  110.29   10.10
  -3  -9   1  117.59   14.20
  -3  -9   1  112.49   10.00
   3  -9  -1  110.19   34.60
  -3  -9   1  123.89   29.90
   3  -9  -1   99.49    9.90
  -3   9   1  101.99   11.80
  -3   9   1  114.29    9.20
  -3   9   1  104.19   13.70
  -3   9   1  110.09   10.90
   3   9  -1   35.90   76.09
  -3   9   1  110.29   13.00
   3   9  -1  126.39   20.60
   3   9  -1   97.49   38.80
   3   9  -1   98.79   20.10
  -3   9   1  112.99    9.60
  -2  -9   1  248.38   16.10
   2  -9  -1  262.77   16.20
   2  -9  -1  259.47   17.50
  -2  -9   1  264.37   17.00
  -2  -9   1  235.68   21.20
   2  -9  -1  226.48   42.60
   2  -9  -1  234.58   21.40
  -2  -9   1  267.87   39.60
   2   9  -1  327.77   59.39
   2   9  -1  256.17   27.80
  -2   9   1  296.07   18.80
   2   9  -1  397.26   74.39
  -2   9   1  266.17   22.80
  -2   9   1  256.27   15.10
   2   9  -1  269.47   93.69
  -2   9   1  285.17   21.00
   2   9  -1  262.17   23.30
  -2   9   1  256.47   22.00
  -2   9   1  264.67   16.00
  -1  -9   1  555.74   34.10
   1  -9  -1  519.25   33.50
  -1  -9   1  493.45   57.49
   1  -9  -1  544.75   27.80
   1  -9  -1  556.64   61.09
  -1  -9   1  549.85   27.90
   1  -9  -1  564.24   28.20
  -1  -9   1  476.45   25.80
   1   9  -1  384.46  162.38
   1   9  -1  526.95   34.50
  -1   9   1  543.35   27.90
  -1   9   1  552.04   34.60
   1   9  -1  595.14  101.59
   1   9  -1  532.95   42.80
   0  -9  -1  643.14   37.60
   0  -9   1  630.24   37.40
   0  -9  -1  693.73   31.70
   0  -9  -1  582.14   62.59
   0  -9  -1  623.04   30.20
   0  -9   1  663.33   32.00
   0  -9   1  662.73   30.50
   0  -9   1  653.23   65.69
   0   9   1  653.43   39.00
   0   9  -1  530.55   41.30
   0   9   1  672.03   96.89
   0   9  -1  680.83   38.60
   0   9  -1  571.14   94.59
   0   9   1  557.94   88.49
   0   9   1  522.15   41.90
  -1  -9  -1  188.18   42.20
  -1  -9  -1  166.88   13.00
   1  -9   1  153.78   16.90
   1  -9   1  146.09   11.80
   1  -9   1  165.28   13.60
  -1  -9  -1  164.28   17.00
  -1  -9  -1  158.58   12.30
   1  -9   1  129.19   35.30
   1   9   1  145.99   20.30
  -1   9  -1  176.68   16.90
  -1   9  -1  115.39   50.39
   1   9   1  163.58   18.30
   1   9   1  216.18   73.19
   2  -9   1  489.35   38.60
   2  -9   1  461.65   59.39
  -2  -9  -1  391.36   28.80
  -2  -9  -1  556.94   57.99
  -2  -9  -1  436.66   23.30
  -2  -9  -1  445.46   23.90
   2  -9   1  401.06   28.90
   2  -9   1  417.16   22.20
   2   9   1  349.47   90.69
   2   9   1  396.76   32.40
  -2   9  -1  425.16   21.80
  -2   9  -1  443.86   28.60
   2   9   1  458.95   91.29
  -2   9  -1  374.56   26.40
  -2   9  -1  427.06   28.30
   2   9   1  414.46   35.90
  -3  -9  -1  387.86   49.60
  -3  -9  -1  354.66   20.90
  -3  -9  -1  372.86   34.60
   3  -9   1  379.76   55.69
   3  -9   1  363.86   20.70
  -3  -9  -1  384.56   21.80
  -3   9  -1  396.46   23.70
  -3   9  -1  352.46   19.20
  -3   9  -1  399.16   23.50
  -3   9  -1  379.36   25.70
  -3   9  -1  398.76   27.40
   3   9   1  381.26   30.70
  -3   9  -1  369.36   25.50
  -3   9  -1  367.26   18.90
   3   9   1  361.66   35.40
   3   9   1  324.87  114.09
   4  -9   1  238.98   15.90
   4  -9   1  242.78   44.00
  -4  -9  -1  209.68   19.90
  -4  -9  -1  261.27   48.00
  -4  -9  -1  249.68   12.30
   4   9   1   88.89   78.79
  -4   9  -1  275.37   26.50
  -4   9  -1  201.78   28.80
  -4   9  -1  233.78   15.50
   4   9   1  220.28   27.90
  -4   9  -1  214.68   13.50
  -4   9  -1  217.38   17.80
  -4   9  -1  231.88   17.70
  -4   9  -1  249.48   16.30
   5  -9   1   21.60   21.20
  -5  -9  -1   26.60    4.40
  -5  -9  -1   26.80    4.00
  -5  -9  -1   33.50    4.00
  -5  -9  -1   19.50    7.20
  -5   9  -1   29.10   11.00
  -5   9  -1   23.80    8.30
  -5   9  -1   33.30    7.40
  -5   9  -1   29.50    6.30
  -5   9  -1    9.90    9.90
  -5   9  -1   37.60    5.20
  -5   9  -1   27.50    7.10
   5   9   1   33.90   13.20
  -5   9  -1   26.60    6.00
   5   9   1   47.80   96.19
  -5   9  -1   27.20    5.10
  -6  -9  -1    3.90    3.00
  -6  -9  -1    8.70    2.30
  -6  -9  -1    5.20    2.40
  -6  -9  -1    9.50    2.60
  -6  -9  -1   14.90    4.70
  -6  -9  -1    6.30    2.20
  -6   9  -1    2.90    1.60
  -6   9  -1    6.20    2.70
  -6   9  -1    3.70    3.50
  -6   9  -1    3.30    2.90
  -6   9  -1   -0.20    3.50
  -6   9  -1    1.50    2.80
  -6   9  -1   26.70    9.80
   6   9   1    5.60    6.70
  -6   9  -1    5.60    8.50
  -7  -9  -1  284.97   15.50
  -7  -9  -1  262.57   16.50
  -7  -9  -1  274.37   13.60
  -7  -9  -1  214.68   19.30
  -7  -9  -1  302.37   14.30
  -7  -9  -1  278.07   15.20
  -7  -9  -1  280.27   16.40
  -7   9  -1  272.37   14.60
  -7   9  -1  302.67   20.60
   7   9   1  258.07   26.20
  -7   9  -1  246.58   17.70
  -7   9  -1  295.17   23.40
  -7   9  -1  270.27   19.10
  -7   9  -1  294.47   15.30
  -7   9  -1  278.47   21.20
  -7   9  -1  289.47   23.60
  -8  -9  -1   44.10    4.90
  -8  -9  -1   34.70    5.10
  -8  -9  -1   39.00    4.00
  -8  -9  -1   38.70    4.50
  -8  -9  -1   41.20    5.10
  -8   9  -1   33.80    7.40
   8   9   1   36.00    9.80
  -8   9  -1   42.30    6.10
  -8   9  -1   42.30    8.10
  -8   9  -1   58.49   11.60
  -8   9  -1   40.40    5.10
  -9  -9  -1   71.09    5.80
  -9  -9  -1   78.49    6.00
  -9  -9  -1   74.59    5.60
  -9  -9  -1   62.19    4.60
  -9   9  -1   57.89    6.30
  -9   9  -1   99.99   10.70
   9   9   1   76.99    8.90
  -9   9  -1   85.19   10.30
  -9   9  -1   72.39    5.10
  -9   9  -1   67.39    9.30
  -9 -10   1    2.00    1.10
  -9 -10   1    1.40    1.10
  -9 -10   1    0.70    0.90
  -9  10   1    3.50    1.50
   9  10  -1   -2.10    3.40
  -9  10   1    2.40    2.10
  -9  10   1    5.20    6.20
  -8 -10   1  230.88   12.10
  -8 -10   1  224.28   11.10
  -8 -10   1  192.88   12.10
  -8 -10   1  208.68   11.70
  -8 -10   1  234.08   11.90
  -8  10   1  205.68   11.10
  -8  10   1  208.58   17.70
  -8  10   1  233.38   12.10
  -8  10   1  232.78   17.00
  -8  10   1  201.28   15.00
  -8  10   1  228.58   11.10
   8  10  -1  246.78   21.70
  -7 -10   1  306.07   16.20
  -7 -10   1  259.67   17.20
  -7 -10   1  271.87   21.60
  -7 -10   1  283.67   15.20
  -7 -10   1  284.87   14.50
  -7 -10   1  306.67   15.70
  -7  10   1  312.67   15.20
  -7  10   1  343.17   24.50
  -7  10   1  331.97   24.00
  -7  10   1  311.17   16.20
  -7  10   1  324.57   20.70
  -7  10   1  293.87   16.20
   7  10  -1  297.77   28.00
  -7  10   1  278.27   20.50
   6 -10  -1    7.10    2.70
  -6 -10   1    4.40    2.00
  -6 -10   1    4.70    2.10
  -6 -10   1    2.20    3.50
  -6 -10   1    3.90    1.70
  -6 -10   1    1.80    1.80
  -6  10   1    5.00    3.60
  -6  10   1    2.40    1.90
  -6  10   1   14.70    9.30
   6  10  -1    2.90    6.80
  -6  10   1    0.50    3.10
  -6  10   1    5.00    2.00
  -6  10   1   -6.70    6.80
  -6  10   1    1.70    1.90
   5 -10  -1  302.67   17.10
  -5 -10   1  292.97   16.30
  -5 -10   1  280.97   14.20
  -5 -10   1  283.37   22.70
   5 -10  -1  287.07   18.10
   5  10  -1  295.37   31.90
  -5  10   1  272.47   15.50
  -5  10   1  283.97   16.40
  -5  10   1  267.77   22.90
  -5  10   1  284.67   18.20
  -5  10   1  298.97   20.90
  -5  10   1  283.57   22.40
   5  10  -1  271.07   24.50
  -5  10   1  233.28   18.90
   4 -10  -1  431.06   24.60
   4 -10  -1  408.86   23.50
  -4 -10   1  472.25   31.80
  -4 -10   1  431.56   23.20
   4 -10  -1  452.65   59.09
  -4  10   1  455.35   22.70
  -4  10   1  429.76   20.40
  -4  10   1  449.26   24.80
  -4  10   1  469.55   29.00
   4  10  -1  416.86   34.10
  -4  10   1  413.76   27.90
   4  10  -1  420.26   38.50
  -4  10   1  447.46   22.40
   4  10  -1  298.77  145.59
  -4  10   1  502.15   28.20
  -4  10   1  501.95   31.50
  -3 -10   1  632.54   31.10
   3 -10  -1  631.74   31.60
  -3 -10   1  580.04   37.30
   3 -10  -1  592.54   70.29
  -3 -10   1  592.64   29.50
  -3  10   1  672.43   38.10
  -3  10   1  630.74   28.70
  -3  10   1  556.74   29.00
  -3  10   1  644.74   49.10
  -3  10   1  659.13   33.40
   3  10  -1  378.86  166.88
  -3  10   1  570.64   33.50
   3  10  -1  567.74   45.90
  -2 -10   1  675.03   33.00
   2 -10  -1  670.63   34.00
   2 -10  -1  694.83   40.50
  -2 -10   1  655.73   40.70
   2 -10  -1  741.13   74.99
  -2 -10   1  718.83   34.20
  -2 -10   1  690.43   72.39
   2 -10  -1  699.23   33.50
  -2  10   1  707.43   41.90
  -2  10   1  728.63   31.70
  -2  10   1  695.43   37.10
   2  10  -1  713.73   44.10
   2  10  -1  650.83   48.30
  -2  10   1  717.33   35.40
  -2  10   1  691.33   32.00
  -2  10   1  715.03   38.70
  -1 -10   1 1066.79   88.19
   1 -10  -1  993.00   44.50
   1 -10  -1 1004.40   52.49
  -1 -10   1  922.21   42.60
   1 -10  -1 1003.40   92.99
   1 -10  -1  959.10   43.30
  -1 -10   1 1033.00   45.00
  -1  10   1 1025.20   48.50
   1  10  -1  862.61   57.39
   1  10  -1 1015.70   54.19
  -1  10   1 1063.39   45.60
  -1  10   1  862.61   53.09
  -1  10   1  998.00   53.79
   0 -10   1 1149.69   58.69
   0 -10  -1 1155.18   58.89
   0 -10  -1 1184.48   50.49
   0 -10  -1 1097.79   96.79
   0 -10  -1 1226.38   50.39
   0 -10   1 1133.49   50.89
   0 -10   1 1105.09   94.29
   0 -10   1 1112.09   49.00
   0  10  -1 1129.69   63.99
   0  10  -1 1244.38   60.89
   0  10   1 1210.78   62.09
   0  10   1 1088.29   62.49
   0  10   1 1238.48   50.99
  -1 -10  -1  150.38   12.50
  -1 -10  -1  141.69   40.10
  -1 -10  -1  111.59   11.20
   1 -10   1  145.29   12.60
   1 -10   1  151.38   15.60
   1 -10   1  113.69   11.00
  -1 -10  -1  134.49   15.70
   1 -10   1   98.89   32.60
  -1  10  -1  143.19   17.00
  -1  10  -1  113.09   10.60
   1  10   1  108.19   20.20
  -1  10  -1  138.09   15.00
   1  10   1  129.39   18.10
   2 -10   1  517.65   65.19
   2 -10   1  542.35   28.10
  -2 -10  -1  573.64   61.79
  -2 -10  -1  577.74   29.70
   2 -10   1  524.95   34.70
   2 -10   1  574.44   30.70
  -2 -10  -1  562.64   36.30
  -2 -10  -1  572.04   29.80
   2  10   1  556.74   45.90
  -2  10  -1  567.74   26.40
  -2  10  -1  576.44   34.40
  -2  10  -1  574.84   36.00
  -2  10  -1  511.85   29.70
   2  10   1  568.04   39.70
   2  10   1  573.44  141.89
  -2  10  -1  573.14   26.60
   3 -10   1  150.78   12.70
  -3 -10  -1  160.28   13.40
  -3 -10  -1  162.58   13.10
  -3 -10  -1  181.08   18.50
   3 -10   1  155.28   14.10
  -3 -10  -1  118.99   36.10
   3 -10   1  167.58   49.70
   3  10   1  140.89   20.30
   3  10   1   94.39   84.59
  -3  10  -1  161.48   14.60
  -3  10  -1  161.08   11.50
  -3  10  -1  161.48   16.80
  -3  10  -1  156.58   16.70
  -3  10  -1  190.28   15.60
   3  10   1  183.58   25.20
  -4 -10  -1  131.19   16.10
  -4 -10  -1  143.39    8.80
   4 -10   1  149.59   12.00
   4 -10   1  139.99   13.30
  -4  10  -1  154.68   12.20
  -4  10  -1  146.69   16.50
   4  10   1  129.79   21.50
  -4  10  -1  144.39   10.70
   4  10   1  135.79   24.70
  -4  10  -1  148.69   11.90
  -4  10  -1  160.18   15.10
  -4  10  -1  136.29   18.20
  -4  10  -1  156.38   14.40
  -4  10  -1  159.88   14.10
  -5 -10  -1  108.09   13.30
  -5 -10  -1  112.29    7.50
  -5 -10  -1  120.09    8.60
   5 -10   1  122.39   12.00
  -5  10  -1  102.59   13.90
  -5  10  -1  108.59   12.20
  -5  10  -1   99.19   10.00
  -5  10  -1  113.99   11.90
  -5  10  -1  119.59   17.90
  -5  10  -1  110.69    9.70
  -5  10  -1  125.09    9.40
   5  10   1  111.09   22.50
  -6 -10  -1   53.29    4.80
  -6 -10  -1   58.89    6.00
  -6 -10  -1   59.29    5.10
  -6 -10  -1   52.09    5.30
   6 -10   1   63.29    8.90
  -6 -10  -1   47.20   10.30
  -6  10  -1   63.99    6.20
  -6  10  -1   54.39    7.90
  -6  10  -1   60.09   10.10
  -6  10  -1   52.69    7.70
   6  10   1   45.50   13.40
  -6  10  -1   61.49    6.00
  -6  10  -1   55.09    9.70
  -6  10  -1   47.60   12.20
  -7 -10  -1   43.00    4.00
  -7 -10  -1   42.10    5.20
   7 -10   1   42.30    5.10
  -7 -10  -1   40.80    4.60
  -7 -10  -1   37.20    4.50
   7  10   1   43.40   11.80
  -7  10  -1   47.10    4.70
  -7  10  -1   44.60    9.30
  -7  10  -1   42.70    8.00
  -7  10  -1   35.60    9.30
  -7  10  -1   36.00    5.90
  -8 -10  -1   82.49    6.20
  -8 -10  -1   69.19    4.60
  -8 -10  -1   89.89    6.40
  -8 -10  -1   70.59    6.30
   8  10   1   76.29   11.10
  -8  10  -1   81.79   10.00
  -8  10  -1   74.29   10.10
  -8  10  -1  101.09   11.60
  -8  10  -1   59.59    6.90
  -8  10  -1   76.09    5.40
  -9 -10  -1  321.97   15.20
  -9 -10  -1  358.26   15.30
  -9  10  -1  415.06   19.80
  -8 -11   1  327.27   14.80
  -8 -11   1  401.36   15.90
  -8 -11   1  334.87   14.20
  -8 -11   1  369.86   16.30
  -8  11   1  349.17   19.00
   8  11  -1  375.96   24.50
  -8  11   1  297.17   20.10
  -8  11   1  328.07   15.00
  -7 -11   1  200.08   10.90
  -7 -11   1  176.98    9.70
  -7 -11   1  183.88   10.50
  -7 -11   1  184.68   10.90
  -7  11   1  203.68   12.10
   7  11  -1  180.28   20.00
  -7  11   1  179.38   10.80
  -7  11   1  156.28   16.30
  -7  11   1  186.78    9.80
  -7  11   1  210.88   21.30
  -7  11   1  200.68   16.60
  -6 -11   1  151.68    9.50
  -6 -11   1  150.68    8.80
  -6 -11   1  150.88   13.60
  -6 -11   1  143.19    9.30
   6 -11  -1  150.68   10.40
  -6  11   1  136.49   10.50
   6  11  -1  129.39   18.90
  -6  11   1  137.49   14.40
  -6  11   1  167.18   18.10
  -6  11   1  148.09   10.20
  -6  11   1  146.69   13.50
  -6  11   1  138.79    9.10
  -5 -11   1  109.39    8.00
   5 -11  -1   86.49   10.00
  -5 -11   1  103.79    7.00
   5 -11  -1   83.29    9.10
  -5 -11   1   97.69   12.40
  -5  11   1   98.19   14.20
   5  11  -1  126.99   18.10
  -5  11   1   96.29   12.20
  -5  11   1  106.99   11.60
  -5  11   1   99.49    8.00
   5  11  -1   73.99   16.20
  -5  11   1  108.29    8.70
  -5  11   1  100.69    9.40
   4 -11  -1  323.57   21.10
   4 -11  -1  337.37   20.40
  -4 -11   1  349.47   16.40
  -4 -11   1  360.76   27.70
  -4  11   1  325.67   24.00
  -4  11   1  332.37   25.60
  -4  11   1  369.16   20.50
   4  11  -1  318.57   34.30
  -4  11   1  353.96   20.70
  -4  11   1  347.57   23.00
  -4  11   1  337.77   25.10
   4  11  -1  349.57   33.50
  -4  11   1  371.36   19.60
  -3 -11   1  196.48   14.70
   3 -11  -1  190.68   14.80
  -3 -11   1  195.08   13.90
  -3 -11   1  202.38   19.80
   3 -11  -1  217.08   14.60
  -3  11   1  190.08   18.50
  -3  11   1  210.38   12.10
  -3  11   1  158.58   16.30
  -3  11   1  191.28   12.70
  -3  11   1  178.18   17.40
   3  11  -1  214.78   26.50
  -3  11   1  207.88   13.40
  -3  11   1  205.28   16.40
   3  11  -1  211.08   21.80
   2 -11  -1  819.22   37.80
  -2 -11   1  812.72   37.30
   2 -11  -1  833.62   47.40
   2 -11  -1  776.52   37.90
  -2 -11   1  802.42   46.30
  -2 -11   1  849.12   38.80
   2  11  -1  778.22   53.29
  -2  11   1  693.23   40.20
  -2  11   1  844.72   39.70
  -2  11   1  819.82   46.50
   2  11  -1  797.82   49.10
  -2  11   1  797.02   35.50
  -2  11   1  825.12   35.50
   1 -11  -1 1474.75   58.29
  -1 -11   1 1383.16  107.59
  -1 -11   1 1275.87   66.59
   1 -11  -1 1377.66   66.99
   1 -11  -1 1292.47   57.49
  -1 -11   1 1423.16   57.59
   1 -11  -1 1496.25  118.19
  -1 -11   1 1416.86   58.59
   1  11  -1 1476.65   70.99
  -1  11   1 1356.56   55.69
  -1  11   1 1412.06   58.69
   1  11  -1 1286.97   72.79
  -1  11   1 1253.37   60.39
  -1  11   1 1428.36   69.59
   0 -11   1   27.00    6.50
   0 -11   1   11.60    5.90
   0 -11  -1   19.10    5.50
   0 -11  -1   18.80    4.90
   0 -11   1    3.70   19.20
   0 -11  -1   25.80    7.30
   0 -11   1   21.60    5.70
   0 -11  -1    8.40   23.40
   0  11   1   16.90    7.60
   0  11  -1   20.70   10.90
   0  11   1   31.60    6.70
   0  11   1   11.90    9.50
   0  11  -1   23.30    7.80
   0  11  -1   23.30    7.60
  -1 -11  -1   33.50   23.00
  -1 -11  -1   17.20    5.20
   1 -11   1   25.70    6.40
   1 -11   1   14.40   18.00
  -1 -11  -1   20.80    6.00
  -1 -11  -1   26.30    8.40
   1 -11   1   32.00    6.90
   1 -11   1   44.90   10.40
   1  11   1   17.80   10.10
   1  11   1   25.30    8.70
  -1  11  -1   28.80    8.40
  -1  11  -1   25.60    5.90
   1  11   1   31.10    6.90
  -1  11  -1   17.40    6.70
   2 -11   1  286.97   20.00
   2 -11   1  290.77   25.70
  -2 -11  -1  298.47   19.10
  -2 -11  -1  314.27   19.80
   2 -11   1  295.37   18.80
  -2 -11  -1  285.97   24.50
  -2  11  -1  302.17   17.20
  -2  11  -1  294.47   20.20
  -2  11  -1  294.27   24.60
   2  11   1  302.37   28.30
   2  11   1  272.17   29.80
  -2  11  -1  310.67   23.60
  -3 -11  -1  106.19    6.90
   3 -11   1  108.19   11.10
  -3 -11  -1   94.29    9.70
  -3 -11  -1  106.29   14.40
   3 -11   1  110.99   10.10
   3  11   1  110.39   22.10
  -3  11  -1  106.39   13.40
  -3  11  -1   95.79   12.10
  -3  11  -1  110.49   13.70
   3  11   1  108.59   20.20
  -3  11  -1  102.69    8.90
  -3  11  -1   99.69   10.60
   4 -11   1  234.78   18.70
   4 -11   1  255.17   17.50
  -4 -11  -1  220.08   11.80
  -4 -11  -1  223.18   17.20
  -4 -11  -1  231.08   11.60
  -4 -11  -1  236.18   21.80
  -4  11  -1  206.48   19.40
  -4  11  -1  194.68   24.40
   4  11   1  240.68   26.60
  -4  11  -1  243.68   18.00
   4  11   1  199.68   24.00
  -4  11  -1  232.88   17.60
  -4  11  -1  228.48   17.40
  -4  11  -1  225.48   13.70
   5 -11   1   43.10    8.40
   5 -11   1   37.40    6.60
  -5 -11  -1   33.90    4.10
  -5 -11  -1   41.50    4.80
  -5 -11  -1   47.90    4.30
  -5 -11  -1   47.30    8.30
  -5  11  -1   27.10    6.10
  -5  11  -1   36.90    5.10
   5  11   1   35.30   11.50
  -5  11  -1   30.00    8.10
  -5  11  -1   33.40    8.00
   5  11   1    8.40    9.10
  -5  11  -1   36.20    4.70
  -5  11  -1   29.50    8.60
  -6 -11  -1   23.30    3.50
  -6 -11  -1   22.20    3.40
  -6 -11  -1   24.20    5.70
   6 -11   1   19.80    4.00
  -6 -11  -1   30.80    3.20
  -6  11  -1   15.70    4.30
  -6  11  -1   32.50    8.30
   6  11   1   32.10   10.60
  -6  11  -1   26.10    3.70
  -6  11  -1   23.10    6.80
  -6  11  -1   19.90    3.80
  -6  11  -1   13.40    7.00
   7 -11   1   46.00    5.00
  -7 -11  -1   51.39    4.80
  -7 -11  -1   51.19    4.50
  -7 -11  -1   42.40    4.60
  -7  11  -1   41.40    4.10
  -7  11  -1   46.00    6.10
  -7  11  -1   45.80    7.50
   7  11   1   44.30   10.10
  -7  11  -1   24.00    7.90
  -7  11  -1   75.69   11.50
  -8 -11  -1   39.90    3.80
  -8 -11  -1   40.80    3.50
  -8  11  -1   38.60    4.50
  -8  11  -1   39.20    3.10
  -8  11  -1   62.59    9.50
   8  11   1   36.00    6.80
  -8  11  -1   41.80    7.00
  -8 -12   1    2.30    0.90
   8  12  -1   -3.40    3.00
  -8  12   1    2.40    2.30
  -8  12   1    2.20    1.00
  -7 -12   1  148.29    7.00
  -7 -12   1  157.38    8.10
  -7 -12   1  130.09    7.60
  -7 -12   1  137.39    7.80
  -7  12   1  142.49   11.80
  -7  12   1  119.59    7.20
  -7  12   1  158.88    8.40
   7  12  -1  132.69   13.60
  -6 -12   1    0.60    0.90
  -6 -12   1   -0.30    0.90
  -6 -12   1    3.40    3.30
  -6 -12   1    0.80    0.90
   6  12  -1   -0.90    3.90
  -6  12   1   -1.60    1.40
  -6  12   1    0.60    2.20
  -6  12   1   -1.20    1.70
  -6  12   1    0.40    0.90
  -6  12   1    1.00    1.10
   5 -12  -1  104.69    8.90
   5 -12  -1  107.79    8.50
  -5 -12   1  112.79    6.90
  -5 -12   1  106.39    7.60
  -5 -12   1  111.99   12.20
  -5 -12   1  108.69    7.50
   5  12  -1  118.59   17.20
  -5  12   1  119.79    9.40
  -5  12   1   92.89    7.70
   5  12  -1  108.09   16.90
  -5  12   1   92.49   10.70
  -5  12   1  106.39    7.40
  -5  12   1  104.89   10.60
   4 -12  -1   93.39    9.00
  -4 -12   1  100.99   12.80
  -4 -12   1   95.49    6.40
   4 -12  -1   93.99    8.90
   4  12  -1   73.19   16.30
  -4  12   1   96.79    8.20
  -4  12   1   88.99   10.10
  -4  12   1   93.49    9.10
   4  12  -1   89.59   15.80
  -4  12   1   82.79   10.60
  -4  12   1   74.39    9.50
  -4  12   1   96.59    7.40
   3 -12  -1  254.97   16.40
  -3 -12   1  246.78   15.70
  -3 -12   1  247.18   21.40
  -3 -12   1  241.88   16.30
   3 -12  -1  268.77   16.80
  -3  12   1  260.27   14.40
  -3  12   1  239.58   16.30
  -3  12   1  233.08   20.10
   3  12  -1  253.57   23.60
   3  12  -1  243.08   26.80
  -3  12   1  257.57   18.20
  -3  12   1  261.87   15.30
  -3  12   1  204.18   17.80
  -2 -12   1   17.80    5.30
   2 -12  -1   19.00    4.90
   2 -12  -1   12.20    4.80
  -2 -12   1   21.90    8.80
  -2 -12   1   21.00    5.60
  -2  12   1   13.00    3.30
  -2  12   1   18.30    4.10
  -2  12   1   19.70    7.70
   2  12  -1   24.70    7.50
  -2  12   1   16.00    5.40
   2  12  -1   26.40    5.40
  -2  12   1   12.90    5.10
  -1 -12   1   15.30    4.20
   1 -12  -1   23.10    5.90
   1 -12  -1   12.20    7.90
  -1 -12   1   13.40    4.50
   1 -12  -1   17.70    5.00
  -1  12   1   14.10    3.70
  -1  12   1   19.80    7.40
  -1  12   1   13.30    4.50
   1  12  -1   30.50    9.10
   1  12  -1    6.90    4.80
  -1  12   1   16.20    4.10
   0 -12   1  241.98   17.50
   0 -12  -1  238.48   17.10
   0 -12  -1  264.87   18.00
   0 -12   1  259.07   17.30
   0  12  -1  267.87   20.30
   0  12  -1  274.17   24.60
   0  12   1  265.77   17.20
   0  12   1  278.57   25.70
  -1 -12  -1  107.39   25.40
   1 -12   1   78.19    9.10
   1 -12   1   73.79    8.50
  -1 -12  -1   74.49    8.90
   1 -12   1   89.99   13.70
  -1 -12  -1   72.69    8.70
  -1  12  -1   66.99    7.20
  -1  12  -1   81.89   11.60
   1  12   1   76.39    7.80
  -1  12  -1   75.39   10.40
   1  12   1   58.19   13.80
   1  12   1   66.29   18.00
  -1  12  -1   82.89    9.30
   2 -12   1  303.97   19.60
  -2 -12  -1  314.57   26.10
  -2 -12  -1  297.17   19.20
  -2  12  -1  263.07   21.60
  -2  12  -1  237.58   20.50
   2  12   1  276.47   35.80
  -2  12  -1  335.27   20.20
   3 -12   1  221.78   16.20
  -3 -12  -1  248.78   11.50
   3 -12   1  244.58   15.70
  -3 -12  -1  263.47   22.90
  -3  12  -1  235.28   18.70
  -3  12  -1  235.78   14.10
  -3  12  -1  216.48   18.80
   3  12   1  196.18   22.30
   3  12   1  230.18   25.30
  -3  12  -1  242.58   15.40
  -3  12  -1  210.78   16.50
   4 -12   1   85.49    8.90
  -4 -12  -1   95.99    7.20
  -4 -12  -1   90.09    6.50
  -4 -12  -1   90.59   12.30
   4 -12   1   90.89    8.50
  -4  12  -1   76.69    8.60
  -4  12  -1   89.09   11.40
   4  12   1   52.79   12.90
  -4  12  -1   82.99    9.50
  -4  12  -1   68.49   11.60
  -4  12  -1   81.29    7.10
   4  12   1   81.09   16.00
  -4  12  -1   84.69    7.80
   5 -12   1   94.99    8.00
  -5 -12  -1  114.99   14.20
   5 -12   1   73.99    7.70
  -5 -12  -1   95.99    7.10
  -5 -12  -1   86.99    6.20
  -5  12  -1   80.79   14.70
  -5  12  -1   79.29    9.20
  -5  12  -1   75.49    6.70
  -5  12  -1   82.39    6.50
   5  12   1   58.39   13.00
   5  12   1   72.39   13.60
  -5  12  -1   84.59   11.00
  -6 -12  -1   75.09    5.80
  -6 -12  -1   80.69    5.50
   6 -12   1   54.39    5.70
  -6 -12  -1   55.19    9.50
  -6  12  -1   76.49    9.30
  -6  12  -1   72.29    5.60
  -6  12  -1   85.19   11.60
  -6  12  -1   71.49    7.80
   6  12   1   93.69   12.50
  -7 -12  -1   37.60    3.50
  -7 -12  -1   34.30    3.80
  -7 -12  -1   39.00    3.20
  -7  12  -1   41.60    3.30
  -7  12  -1   55.29    8.90
  -7  12  -1   44.30    5.70
   7  13  -1   23.20    5.90
  -7  13   1   25.00    2.70
  -7  13   1   20.40    3.10
  -6 -13   1  109.09    6.70
  -6 -13   1  107.29    6.30
  -6 -13   1  133.59    7.50
  -6  13   1  117.29    6.90
  -6  13   1  121.89    9.40
  -6  13   1  100.99    6.50
   6  13  -1  124.79   12.80
  -5 -13   1  143.89    7.30
   5 -13  -1  123.59    8.40
  -5 -13   1  168.08   13.40
  -5 -13   1  117.69    7.50
  -5 -13   1  169.18    8.70
  -5  13   1  150.68   11.60
   5  13  -1  169.58   17.30
  -5  13   1  115.69   12.40
   5  13  -1  167.38   16.40
  -5  13   1  142.09    9.30
  -5  13   1  141.99    8.80
  -4 -13   1   20.10    2.40
   4 -13  -1   15.20    3.90
   4 -13  -1   14.20    5.40
  -4 -13   1   17.00    6.00
  -4 -13   1   20.40    2.70
  -4  13   1   16.60    3.90
  -4  13   1   15.80    3.30
   4  13  -1   26.20    7.60
  -4  13   1   21.40    5.30
   4  13  -1   15.00    7.80
  -4  13   1   20.30    4.90
  -4  13   1   18.40    2.80
   3 -13  -1  117.99    9.90
  -3 -13   1  137.29    7.50
  -3 -13   1  113.69   13.30
   3 -13  -1  128.79   10.60
  -3 -13   1  122.79    9.40
  -3  13   1  125.29    8.10
  -3  13   1  129.29    9.20
   3  13  -1  128.89   16.10
  -3  13   1  117.39   10.90
  -3  13   1  128.59   10.30
   3  13  -1  125.59   16.60
  -3  13   1  121.19   12.40
   2 -13  -1  542.55   27.80
  -2 -13   1  578.74   27.50
   2 -13  -1  587.44   28.40
  -2 -13   1  572.84   28.10
  -2 -13   1  574.44   35.50
   2  13  -1  545.95   36.60
   2  13  -1  590.64   37.80
  -2  13   1  543.45   27.70
   2  13  -1  605.74   28.00
  -2  13   1  539.75   28.60
  -2  13   1  602.34   26.30
  -2  13   1  552.64   24.50
  -2  13   1  518.15   33.20
  -1 -13   1  264.67   17.30
   1 -13  -1  251.67   16.80
  -1 -13   1  266.97   22.60
   1 -13  -1  266.37   17.10
   1 -13  -1  272.47   24.80
  -1 -13   1  281.97   17.00
   1  13  -1  238.48   22.20
   1  13  -1  232.48   22.20
  -1  13   1  264.17   14.70
  -1  13   1  270.17   15.40
  -1  13   1  258.87   22.90
  -1  13   1  263.17   17.00
   1  13  -1  250.37   16.20
   1  13  -1  278.77   24.10
   0 -13   1    0.90    1.70
   0 -13  -1   -3.00    1.50
   0 -13  -1    5.50    4.70
   0 -13   1    2.60    4.80
   0 -13  -1   -3.90    1.50
   0 -13   1    0.00    1.50
   0  13  -1   -1.40    2.10
   0  13  -1    0.80    1.50
   0  13  -1    1.10    1.80
   0  13   1   -1.20    1.00
   0  13   1    0.30    2.30
   0  13  -1    5.60    4.70
   0  13   1    0.90    1.80
   0  13   1    0.60    3.90
  -1 -13  -1   75.49   11.60
  -1 -13  -1   70.39    7.90
   1 -13   1   64.19    7.60
   1 -13   1   80.39   23.10
  -1 -13  -1   69.69    7.90
   1 -13   1   53.09    7.30
  -1  13  -1   51.59    7.90
  -1  13  -1   64.59    6.20
  -1  13  -1   57.79   11.10
  -1  13  -1   54.59    7.20
   1  13   1   56.29   12.70
   1  13   1   66.89   11.60
   2 -13   1   12.20    3.50
  -2 -13  -1   14.60    4.70
  -2 -13  -1   14.90    2.60
   2 -13   1   10.90    3.40
  -2  13  -1    9.60    2.80
  -2  13  -1   11.70    4.20
  -2  13  -1   14.40    4.10
  -2  13  -1   15.70    4.60
   2  13   1   14.70    6.40
   2  13   1    5.20    5.50
   3 -13   1  336.57   18.30
  -3 -13  -1  333.47   24.70
  -3 -13  -1  322.77   14.30
   3 -13   1  294.77   18.30
  -3  13  -1  309.47   20.10
  -3  13  -1  313.97   16.10
  -3  13  -1  322.27   17.40
  -3  13  -1  294.37   19.10
   3  13   1  312.97   25.60
   3  13   1  334.07   26.70
  -4 -13  -1  203.58   11.50
   4 -13   1  187.38   13.10
   4 -13   1  238.68   13.20
  -4 -13  -1  215.18   10.30
  -4 -13  -1  204.08   17.60
  -4  13  -1  196.08   11.80
   4  13   1  218.98   26.30
  -4  13  -1  179.68   15.40
  -4  13  -1  212.68   15.40
   4  13   1  219.28   19.80
  -4  13  -1  200.18   12.30
   5 -13   1   32.90    3.80
   5 -13   1   33.60    4.50
  -5 -13  -1   34.70    3.50
  -5 -13  -1   32.40    2.90
  -5 -13  -1   24.50    6.40
  -5  13  -1   26.10    3.30
  -5  13  -1   21.70    4.70
  -5  13  -1   25.60    3.30
   5  13   1   26.60    7.50
   5  13   1   26.20    7.60
  -5  13  -1   17.50    3.90
  -6 -13  -1   51.99    4.30
  -6 -13  -1   40.80    4.30
  -6  13  -1   46.70    5.80
  -6  13  -1   46.50    3.60
  -6  13  -1   56.59    6.70
  -5 -14   1   36.80    2.70
  -5 -14   1   31.00    2.70
  -5 -14   1   33.90    3.00
  -5  14   1   40.00    3.30
   5  14  -1   44.50    6.50
  -5  14   1   31.80    3.00
  -5  14   1   28.40    3.80
  -4 -14   1   56.69    4.60
  -4 -14   1   81.59    9.40
  -4 -14   1   82.19    5.20
  -4 -14   1   71.79    4.60
   4  14  -1   69.89    9.90
  -4  14   1   78.99    6.10
  -4  14   1   63.69    6.50
  -4  14   1   78.39    5.60
   3 -14  -1   38.80    4.80
  -3 -14   1   46.40    3.70
  -3 -14   1   45.20    3.30
  -3 -14   1   61.99    8.10
   3  14  -1   50.89   10.00
  -3  14   1   51.99    5.50
  -3  14   1   40.30    5.30
  -3  14   1   45.60    4.50
  -3  14   1   36.90    5.50
   3  14  -1   43.50    8.50
   2 -14  -1  303.07   18.10
   2 -14  -1  307.67   16.80
  -2 -14   1  295.17   15.80
  -2 -14   1  260.47   12.10
  -2 -14   1  292.57   21.60
  -2  14   1  277.67   19.00
  -2  14   1  300.67   14.70
   2  14  -1  300.87   22.50
  -2  14   1  305.27   16.60
  -2  14   1  309.27   14.10
  -2  14   1  261.37   15.80
   1 -14  -1  136.09   10.50
  -1 -14   1  148.89   11.00
  -1 -14   1  171.08   15.90
   1 -14  -1  138.69   17.30
   1 -14  -1  154.08   14.00
  -1  14   1  117.49   21.50
   1  14  -1  145.89    9.70
  -1  14   1  153.28   10.60
  -1  14   1  152.68   10.90
  -1  14   1  147.39   10.90
  -1  14   1  155.18   10.80
   1  14  -1  130.89   17.90
   1  14  -1  156.48   10.40
   0 -14   1   56.29    6.40
   0 -14   1   77.79   10.40
   0 -14  -1   54.19    6.10
   0 -14   1   60.29    6.80
   0  14  -1   50.69    5.20
   0  14   1   47.90    5.00
   0  14   1   46.40   10.00
   0  14  -1   60.19   11.60
   0  14  -1   53.79    5.90
   0  14   1   57.79    5.60
   1 -14   1   19.10    4.20
  -1 -14  -1   27.60    7.30
  -1  14  -1   22.50    4.60
  -1  14  -1   31.90    6.60
   1  14   1   18.70    3.30
   1  14   1   19.80    4.00
   2 -14   1   47.10    5.60
  -2 -14  -1   45.80    9.80
   2 -14   1   48.30    5.70
  -2  14  -1   48.40    4.70
  -2  14  -1   38.20    8.00
  -2  14  -1   40.20    7.50
  -2  14  -1   47.20    5.20
  -2  14  -1   44.90    5.80
   2  14   1   48.50    5.20
   2  14   1   46.20    4.60
   2  14   1   42.00    9.50
   3 -14   1  362.16   17.90
  -3 -14  -1  387.26   24.30
  -3  14  -1  310.87   18.30
  -3  14  -1  367.36   16.20
  -3  14  -1  343.27   16.60
   3  14   1  381.26   16.30
   3  14   1  353.16   15.60
   3  14   1  365.66   23.80
   3  14   1  349.27   23.90
  -3  14  -1  284.77   18.10
  -4 -14  -1   98.59    6.30
   4 -14   1  128.59    8.00
   4 -14   1   99.39    7.20
   4  14   1  145.39   11.10
  -4  14  -1  109.79    6.40
  -4  14  -1  122.49    6.90
   4  14   1  119.89    7.40
  -4  14  -1   98.49    8.30
   4  14   1  107.69   12.00
   4  14   1  116.29    7.90
  -4  14  -1   91.09    8.00
  -5 -14  -1   33.10    3.00
  -5 -14  -1   28.10    2.60
  -5  14  -1   30.60    2.60
   5  14   1   39.20    5.10
  -5  14  -1   29.00    3.60
  -4  15   1   84.09    4.80
   4  15  -1  103.19    5.10
  -3 -15   1  227.88    9.80
  -3  15   1  259.57   10.80
  -3  15   1  196.68   10.70
   3  15  -1  236.38   15.60
   2  15  -1   12.20    2.60
  -2  15   1   18.90    4.40
   2  15  -1   21.00    6.80
   1  15  -1   44.80    4.00
  -1  15   1   44.10    3.80
   1  15  -1   38.80    7.80
  -1  15   1   42.80    4.60
  -1  15   1   26.30    7.10
   0  15  -1   49.60    4.30
   0  15   1   52.09    4.30
   0  15   1   51.09    7.80
   0  15  -1   47.70    4.80
   0  15  -1   57.99    7.60
   0  15   1   43.00    4.70
   0  15  -1   70.09    7.20
   1 -15   1   45.40    4.70
   1 -15   1   33.80    4.10
   1  15   1   46.10    4.10
  -1  15  -1   44.00    3.80
   1  15   1   41.40    7.80
  -1  15  -1   32.10    4.60
  -1  15  -1   39.60    4.20
   1  15   1   43.90    4.40
   2 -15   1   16.30    3.30
   2 -15   1   14.80    2.90
  -2  15  -1   14.10    2.10
  -2  15  -1   15.90    2.30
  -2  15  -1   10.20    2.50
   2  15   1   13.60    2.00
   2  15   1    6.90    3.30
  -3 -15  -1   43.60    3.20
  -3  15  -1   36.40    4.00
   3  15   1   33.60    6.00
   3  15   1   34.70    3.70
  -3  15  -1   37.50    3.00
   3  15   1   38.00    3.40
 -12   0   2    1.50    1.00
 -12   0   2   -4.00    3.00
 -12   0   2    2.90    2.60
 -12   0   2    0.40    1.80
 -11   0   2 2398.16   78.49
 -11   0   2 2348.27   78.79
 -11   0   2 2249.38   81.39
 -11   0   2 2269.67   81.19
 -11   0   2 2303.17   78.49
 -11   0   2 1984.00   82.69
 -11   0   2 2051.59   78.89
 -11   0   2 1973.20   79.29
 -10   0   2   47.10    5.10
 -10   0   2   46.70    5.40
 -10   0   2   39.00    5.80
 -10   0   2   37.30    5.50
 -10   0   2   38.90    4.60
 -10   0   2   43.30    4.70
 -10   0   2   47.40    7.60
 -10   0   2   40.00    5.80
 -10   0   2   42.80    6.40
 -10   0   2   39.00   10.50
 -10   0   2   39.70    5.60
 -10   0   2   37.10    6.00
 -10   0   2   37.70    5.70
  -9   0   2    9.60    2.80
  -9   0   2   11.60    3.50
  -9   0   2    4.40    3.40
  -9   0   2    9.40    2.40
  -9   0   2   16.10   12.20
  -9   0   2   11.80    4.10
  -9   0   2   10.00    4.00
  -9   0   2   11.00    4.20
  -9   0   2   25.10    8.60
  -9   0   2    6.90    3.20
  -9   0   2   11.70    2.90
  -9   0   2    7.70    6.90
  -9   0   2   11.10    3.80
  -9   0   2   12.80    4.50
  -9   0   2   14.70    7.90
  -9   0   2    8.60    2.20
  -9   0   2   10.20    5.10
  -9   0   2    8.70    3.30
  -9   0   2   22.20   20.50
  -8   0   2  690.73   29.40
  -8   0   2  727.13   32.30
  -8   0   2  701.63   33.70
  -8   0   2  679.63   39.90
  -8   0   2  727.13   35.40
  -8   0   2  712.53   29.20
  -8   0   2  698.83   31.50
  -8   0   2  658.93   30.20
  -8   0   2  724.93   31.50
  -8   0   2  708.03   32.10
  -8   0   2  685.23   33.10
  -8   0   2  703.43   32.80
  -8   0   2  675.53   31.90
   8   0  -2  410.26  161.98
  -8   0   2  674.43   31.10
  -8   0   2  723.03   33.80
  -8   0   2  691.63   30.00
  -8   0   2  746.03   49.70
  -8   0   2  668.23   37.40
  -8   0   2  685.83   32.60
  -7   0   2    5.80    3.50
  -7   0   2   15.60    4.00
  -7   0   2   16.20    8.50
   7   0  -2  101.09   36.40
   7   0  -2   -5.70   47.00
  -7   0   2    6.80    2.60
  -7   0   2    7.20    4.20
  -7   0   2    9.20    3.80
  -7   0   2    1.40    2.50
  -7   0   2    8.70    4.30
  -7   0   2    8.00    3.00
  -7   0   2    8.50    2.90
  -7   0   2   10.40    3.40
  -7   0   2   13.20   12.10
   7   0  -2   -3.90   33.70
  -7   0   2    9.80    2.90
  -7   0   2    2.60    6.40
   6   0  -2  100.69   39.70
   6   0  -2   64.09   31.10
   5   0  -2  168.68   44.00
   5   0  -2  176.38   54.79
   5   0  -2  228.68   13.30
   4   0  -2 3643.24  196.68
   4   0  -2 3640.34  128.39
   4   0  -2 3568.74  236.38
   4   0  -2 3529.25  128.09
   3   0  -2 9081.79  406.16
   3   0  -2 7541.45  351.26
   3   0  -2 8956.50  290.57
  -2   0   2  545.45   24.80
   2   0  -2  556.24   23.60
   1   0  -2   33.20    4.80
  -1   0   2   33.70    4.40
   0   0   2  889.41   57.49
   0   0   2  770.42   38.30
  -1   0  -2 1094.89   45.20
  -1   0  -2 1007.20   50.69
   1   0   2  939.01   73.19
  -2   0  -2 5066.59  191.28
   2   0   2 4312.57  232.98
   2   0   2 5102.29  178.98
   3   0   2   98.69   14.50
   3   0   2   58.99   25.80
   4   0   2  552.74   51.19
   4   0   2  343.07   65.39
   5   0   2  413.16   36.90
   5   0   2  296.17   67.99
  -6   0  -2  129.09    9.60
  -6   0  -2  148.09   11.70
   6   0   2  182.28   65.99
  -6   0  -2  160.68   10.30
  -6   0  -2  165.28   15.00
  -6   0  -2  200.78   17.80
  -7   0  -2  124.09   11.20
  -7   0  -2  124.39    9.90
  -7   0  -2  131.49   12.50
  -7   0  -2  118.79    9.80
  -7   0  -2  123.49    9.10
  -7   0  -2  126.29   11.40
  -7   0  -2  125.49    9.60
  -7   0  -2  130.89   11.50
   7   0   2  118.79   75.59
   7   0   2   80.39   26.80
  -7   0  -2  126.39   10.70
  -7   0  -2  117.69    8.70
  -7   0  -2  130.29   11.40
  -7   0  -2   98.99   10.80
  -7   0  -2  130.89    8.90
  -7   0  -2  111.89   12.70
  -7   0  -2  130.89   11.00
  -7   0  -2  134.49   12.80
  -7   0  -2  107.69   10.00
  -8   0  -2  112.09   11.30
  -8   0  -2  106.09   10.80
  -8   0  -2  116.69    8.90
  -8   0  -2  107.59   10.60
  -8   0  -2  115.19   12.70
  -8   0  -2  129.69    9.60
  -8   0  -2  115.39   10.30
  -8   0  -2  112.59   10.10
  -8   0  -2  121.39   11.30
  -8   0  -2   84.59   19.70
  -8   0  -2  120.19   11.30
  -8   0  -2  108.49    8.80
  -8   0  -2  115.29   11.30
  -8   0  -2  117.69    9.80
  -8   0  -2  107.79   10.20
  -9   0  -2   40.50    6.60
  -9   0  -2   40.20    9.40
  -9   0  -2   37.50    5.10
  -9   0  -2   41.70    6.00
  -9   0  -2   39.00    6.50
  -9   0  -2   43.00    7.30
  -9   0  -2   34.60    7.90
  -9   0  -2   30.10    6.30
  -9   0  -2   48.60   11.20
  -9   0  -2   42.40    6.60
  -9   0  -2   39.90    5.80
  -9   0  -2   39.30    5.60
 -10   0  -2  118.59    9.80
 -10   0  -2  132.39   11.10
 -10   0  -2  116.69    9.30
 -10   0  -2  136.89    9.30
 -10   0  -2  119.09   12.50
 -10   0  -2  107.99   13.10
 -10   0  -2  130.39   11.10
 -10   0  -2  126.59   10.10
 -10   0  -2  134.29   11.20
 -10   0  -2  138.29   12.90
 -10   0  -2  127.19   10.30
 -11   0  -2  212.98   12.60
 -11   0  -2  217.58   11.50
 -11   0  -2  216.18   15.40
 -11   0  -2  178.98   12.20
 -11   0  -2  224.48   15.40
 -11   0  -2  186.28   11.60
 -11   0  -2  208.18   12.60
 -12  -1   2   93.39    5.20
 -12  -1   2   78.19    6.60
 -12  -1   2   75.29    6.20
 -12  -1   2   92.39    6.50
 -12   1   2   82.19    6.70
 -11  -1   2   19.80    4.30
 -11  -1   2   13.20    3.30
 -11  -1   2   17.20    4.50
 -11  -1   2    4.50    4.50
 -11  -1   2   12.80    2.90
 -11  -1   2   17.10    3.80
 -11  -1   2   16.10    3.50
 -11  -1   2   16.60    4.30
 -11   1   2    9.10    3.80
 -11   1   2   20.10    5.70
 -11   1   2   10.90    3.30
 -11   1   2   12.40    2.60
 -11   1   2   13.30    4.00
 -11   1   2   16.30    3.10
 -11   1   2   16.40    4.70
 -11   1   2   15.20    4.00
 -11   1   2   13.70    2.50
 -10  -1   2  205.08   12.40
 -10  -1   2  214.08   13.00
 -10  -1   2  197.48   15.10
 -10  -1   2  227.28   14.20
 -10  -1   2  168.08   16.30
 -10  -1   2  210.78   12.90
 -10  -1   2  191.38   11.40
 -10  -1   2  209.58   12.10
 -10  -1   2  194.38   14.40
 -10  -1   2  224.08   14.10
 -10  -1   2  227.68   16.40
 -10  -1   2  209.78   13.70
 -10   1   2  228.08   15.60
 -10   1   2  210.38   15.30
 -10   1   2  230.08   14.70
 -10   1   2  213.58   21.70
 -10   1   2  224.48   16.20
 -10   1   2  204.08   11.90
 -10   1   2  208.58   12.50
 -10   1   2  207.38   11.90
 -10   1   2  189.08   14.80
 -10   1   2  216.08   19.20
 -10   1   2  220.38   13.80
 -10   1   2  246.68   17.40
 -10   1   2  204.88   11.70
 -10   1   2  195.48   13.80
 -10   1   2  204.18   13.70
 -10   1   2  210.98   13.80
  -9  -1   2   35.20    5.60
  -9  -1   2   28.90    6.00
  -9  -1   2   29.00    5.60
  -9  -1   2   25.00    4.90
  -9  -1   2   30.20    5.50
  -9  -1   2   26.60    4.90
  -9  -1   2   30.10    5.20
  -9  -1   2   28.00    5.70
  -9  -1   2   31.60    6.10
  -9  -1   2   27.00    6.90
  -9  -1   2   29.20    4.20
  -9  -1   2   29.00    4.00
  -9  -1   2   23.80    5.80
  -9  -1   2   27.60    5.70
  -9  -1   2   18.40    9.00
  -9   1   2   34.10   10.20
  -9   1   2   33.70    6.20
  -9   1   2   21.80    3.90
  -9   1   2   47.60   21.50
  -9   1   2   43.60    9.00
  -9   1   2   23.00    5.10
  -9   1   2   29.20    6.20
  -9   1   2   33.50    6.60
  -9   1   2   26.90    5.30
  -9   1   2   28.30    5.40
  -9   1   2   30.60    6.50
  -9   1   2   24.80    5.60
  -9   1   2   28.90    6.70
  -9   1   2   39.50   13.70
  -9   1   2   26.80    3.90
  -9   1   2   24.80    5.80
  -9   1   2   25.40    4.70
  -9   1   2   29.90    4.10
  -9   1   2   32.60    9.30
  -8  -1   2  150.68   12.00
  -8  -1   2  145.89   12.30
  -8  -1   2  146.19   10.70
  -8  -1   2  152.58   10.30
  -8  -1   2  160.58   14.80
  -8  -1   2  115.29   17.40
  -8  -1   2  133.79   10.40
  -8  -1   2  151.58   10.80
  -8  -1   2  151.28   28.50
  -8  -1   2  148.59   11.60
  -8  -1   2  147.79    9.30
  -8  -1   2  152.88   12.40
  -8  -1   2  148.89   11.90
  -8  -1   2  141.79    9.70
  -8  -1   2  149.88   13.50
  -8  -1   2  144.59   11.10
   8  -1  -2  110.69   94.39
  -8  -1   2  140.69   10.60
  -8  -1   2  122.99   17.70
  -8  -1   2  146.09   12.60
  -8   1   2  144.29   11.50
  -8   1   2  134.69   11.20
  -8   1   2  139.29   12.60
  -8   1   2  150.48   14.00
  -8   1   2  146.79   11.80
  -8   1   2  150.78   10.00
  -8   1   2  148.69   11.10
  -8   1   2  159.38    9.70
  -8   1   2  145.19   11.50
  -8   1   2  138.59   12.10
  -8   1   2  156.58   11.40
  -8   1   2  141.99    9.40
  -8   1   2  151.18   12.00
  -8   1   2  155.28   16.80
  -8   1   2  148.49   11.60
  -8   1   2  144.79   16.50
   8   1  -2  140.59   74.39
  -8   1   2  137.29   12.00
  -8   1   2  162.48   23.60
  -8   1   2  132.19   10.10
  -7  -1   2   34.80   23.90
  -7  -1   2   41.50    7.70
  -7  -1   2   49.40    5.70
   7  -1  -2   61.99   39.30
  -7  -1   2   37.30   12.20
  -7  -1   2   49.10    4.70
  -7  -1   2   47.50    5.10
  -7  -1   2   47.60    6.30
  -7  -1   2   47.60    5.40
   7  -1  -2   33.30   40.70
  -7  -1   2   54.29    5.60
  -7  -1   2   44.10    6.40
  -7  -1   2   36.20    7.70
   7  -1  -2   64.49   23.70
  -7  -1   2   59.29    8.90
   7  -1  -2  113.69   67.59
  -7  -1   2   43.40    5.40
  -7  -1   2   42.20    5.10
  -7   1   2   57.59   11.20
   7   1  -2   15.00   53.89
  -7   1   2   34.00    9.30
  -7   1   2   48.10    4.40
  -7   1   2   48.10    6.30
  -7   1   2   39.50    5.50
  -7   1   2   53.79   13.00
  -7   1   2   44.60    5.00
   7   1  -2   98.69   56.79
  -7   1   2   46.90    7.10
  -7   1   2   46.10    5.70
  -7   1   2   40.70    5.10
  -7   1   2   43.10    5.90
  -7   1   2   50.79    6.20
  -7   1   2   43.20    6.00
  -7   1   2   43.90    4.80
  -7   1   2   56.19    9.20
  -7   1   2   52.09    6.10
  -7   1   2   40.30    5.40
   7   1  -2   53.09   32.20
   6  -1  -2   46.70   32.60
   6  -1  -2   51.59   11.70
   6  -1  -2   63.29   26.90
   6   1  -2   68.69   26.60
   6   1  -2   27.60   29.30
   5  -1  -2  789.82   86.29
   5  -1  -2  826.12  116.49
   5  -1  -2  853.81   46.80
   5   1  -2  808.92   79.69
   5   1  -2  913.71  116.19
   4  -1  -2  893.01   46.80
   4   1  -2  964.50  109.99
   4   1  -2  858.11   77.39
   3  -1  -2 1266.67   56.49
   3   1  -2 1224.78   89.19
   3   1  -2 1227.88  116.49
  -2  -1   2  678.93   31.90
   2  -1  -2  646.34   26.70
   2  -1  -2  686.33   34.30
   2   1  -2  686.93   57.29
   2   1  -2  680.63   74.19
   1  -1  -2 5251.87  183.18
  -1  -1   2 4939.51  178.98
  -1   1   2 5119.99  172.98
   1   1  -2 4731.93  232.38
   1   1  -2 5235.58  209.68
   0  -1   2 5111.59  184.98
   0  -1  -2 5115.99  186.98
   0  -1  -2 4986.80  205.98
   0   1  -2 5247.77  216.58
   0   1  -2 5396.76  200.18
   0   1   2 5059.99  222.98
  -1  -1  -2 5178.08  180.78
   1  -1   2 5068.29  200.28
  -1  -1  -2 4854.51  198.48
  -1   1  -2 4776.82  171.08
  -1   1  -2 5156.28  167.78
   1   1   2 4252.77  193.18
   1   1   2 4079.39  224.58
  -1   1  -2 5053.69  175.28
   2  -1   2  786.72   67.59
   2  -1   2  971.10   41.20
  -2  -1  -2  933.01   68.79
   2  -1   2  857.21   53.99
   2   1   2  922.71   57.79
   3  -1   2  525.65   44.00
   3  -1   2  513.45   61.69
  -3  -1  -2  503.95   88.19
   3   1   2  531.85   46.70
   3   1   2  362.06   65.79
   4  -1   2 1359.26   87.99
   4  -1   2 1302.97  120.39
   4   1   2 1333.77  143.89
   4   1   2 1587.84   96.99
   5  -1   2 1046.00  120.19
   5  -1   2 1138.39   85.59
   5   1   2 1359.06   93.99
   5   1   2 1069.39  142.29
  -6  -1  -2  290.27   18.40
  -6  -1  -2  315.87   17.10
   6  -1   2  287.37   73.79
  -6  -1  -2  296.77   15.70
  -6  -1  -2  280.67   15.40
  -6  -1  -2  316.27   17.10
  -6  -1  -2  289.27   18.70
   6  -1   2  306.07   43.70
  -6  -1  -2  286.87   17.50
  -6   1  -2  300.37   17.60
  -6   1  -2  270.27   18.90
   6   1   2  358.86  110.09
  -6   1  -2  307.67   18.80
  -6   1  -2  302.87   18.40
  -6   1  -2  340.57   19.20
  -6   1  -2  297.27   18.20
  -6   1  -2  300.97   16.00
  -6   1  -2  284.27   14.50
  -7  -1  -2  143.59   12.70
  -7  -1  -2  138.39   10.30
  -7  -1  -2  117.59   10.70
  -7  -1  -2  137.69   13.00
  -7  -1  -2  134.19   11.50
   7  -1   2  125.09   35.60
  -7  -1  -2  125.19    9.70
  -7  -1  -2  143.59   11.80
  -7  -1  -2  129.99    9.10
  -7  -1  -2  128.09    9.20
  -7  -1  -2  143.49   11.60
  -7  -1  -2  121.29    9.40
  -7  -1  -2  136.69   10.40
  -7  -1  -2  130.49   10.90
  -7  -1  -2  141.79   11.40
  -7   1  -2  124.29   11.20
  -7   1  -2  141.89   12.00
  -7   1  -2  143.59   11.00
  -7   1  -2  139.09   12.30
  -7   1  -2  134.69   12.30
  -7   1  -2  137.69   11.90
   7   1   2  208.18   85.59
  -7   1  -2  110.29    9.50
  -7   1  -2  112.39   11.70
  -7   1  -2  134.59   10.40
  -7   1  -2  136.99   12.20
  -7   1  -2  136.19    9.40
  -7   1  -2  130.99   11.20
  -7   1  -2  136.09   10.80
  -7   1  -2  145.29   15.80
  -7   1  -2  136.29   12.50
  -7   1  -2  149.99   13.60
  -7   1  -2  133.99    9.20
  -7   1  -2  130.69    9.10
  -8  -1  -2  680.23   29.00
  -8  -1  -2  656.93   30.80
  -8  -1  -2  677.43   30.50
  -8  -1  -2  687.13   32.80
  -8  -1  -2  639.64   29.30
  -8  -1  -2  699.93   36.50
  -8  -1  -2  661.53   32.40
  -8  -1  -2  693.73   31.50
  -8  -1  -2  636.34   32.30
  -8  -1  -2  672.03   33.10
  -8  -1  -2  677.83   33.70
  -8  -1  -2  641.54   29.10
  -8  -1  -2  698.73   33.80
  -8   1  -2  633.84   30.20
  -8   1  -2  650.13   29.20
  -8   1  -2  649.54   40.80
  -8   1  -2  696.83   29.20
  -8   1  -2  681.33   33.60
  -8   1  -2  658.93   33.20
  -8   1  -2  645.94   33.90
  -8   1  -2  672.23   36.80
  -8   1  -2  667.03   28.70
  -8   1  -2  651.03   33.80
  -8   1  -2  651.43   32.00
  -8   1  -2  691.63   34.50
   8   1   2  949.31  149.69
  -8   1  -2  653.93   31.90
  -8   1  -2  649.54   31.70
   8   1   2  581.44   74.69
  -8   1  -2  647.84   33.00
  -8   1  -2  657.33   31.00
  -9  -1  -2  301.87   16.30
  -9  -1  -2  278.47   18.70
  -9  -1  -2  303.27   19.60
  -9  -1  -2  287.37   17.40
  -9  -1  -2  318.27   17.40
  -9  -1  -2  273.67   21.00
  -9  -1  -2  310.97   21.70
  -9  -1  -2  304.97   19.10
  -9  -1  -2  284.97   17.40
  -9  -1  -2  242.98   18.30
  -9  -1  -2  249.18   22.10
  -9   1  -2  287.87   18.20
  -9   1  -2  301.27   18.30
  -9   1  -2  299.77   16.40
  -9   1  -2  287.77   20.30
  -9   1  -2  287.57   19.40
  -9   1  -2  290.17   21.90
  -9   1  -2  291.87   17.40
  -9   1  -2  290.77   17.10
  -9   1  -2  282.87   19.10
  -9   1  -2  323.97   29.00
  -9   1  -2  219.78   26.40
  -9   1  -2  312.47   20.80
  -9   1  -2  295.17   19.50
 -10  -1  -2   83.89    7.90
 -10  -1  -2  101.39    8.80
 -10  -1  -2   85.69    8.70
 -10  -1  -2   83.29    8.30
 -10  -1  -2   87.29    8.90
 -10  -1  -2   97.49   10.70
 -10  -1  -2   93.39    7.50
 -10  -1  -2   83.79   10.30
 -10  -1  -2   68.09    8.10
 -10  -1  -2   87.49    7.60
 -10   1  -2   79.39    8.70
 -10   1  -2   82.99    8.90
 -10   1  -2   83.49    8.20
 -10   1  -2   92.89   11.00
 -10   1  -2   83.49    7.60
 -10   1  -2   88.79   11.50
 -10   1  -2   98.59    9.40
 -10   1  -2   88.79    9.20
 -10   1  -2   92.49    8.50
 -11  -1  -2  114.39    8.60
 -11  -1  -2  102.59   10.20
 -11  -1  -2  110.29    8.20
 -11  -1  -2  133.99    9.50
 -11  -1  -2  115.79    7.60
 -11  -1  -2  130.69    9.10
 -11   1  -2  112.09    9.70
 -11   1  -2  131.99    8.50
 -11   1  -2  135.49    9.30
 -11   1  -2  119.99   10.10
 -11   1  -2  102.19   10.10
 -11   1  -2  120.09    9.10
 -11   1  -2  115.49    9.20
 -12  -2   2   45.20    4.30
 -12  -2   2   47.50    5.00
 -12  -2   2   62.69    4.10
 -12  -2   2   62.49    4.90
 -11  -2   2   87.59    7.10
 -11  -2   2   79.69    6.80
 -11  -2   2   79.19    6.30
 -11  -2   2   84.19    8.10
 -11  -2   2   90.09    6.40
 -11  -2   2   84.59    8.40
 -11  -2   2   87.39    8.30
 -11  -2   2   82.39   10.50
 -11   2   2   79.09   12.20
 -11   2   2   77.29    8.30
 -11   2   2   85.69    8.10
 -11   2   2   96.59    9.50
 -11   2   2   67.89    8.10
 -11   2   2   91.29    5.90
 -11   2   2   73.59    6.60
 -11   2   2   82.09    5.60
 -11   2   2   98.99    9.90
 -10  -2   2   57.69    8.70
 -10  -2   2   34.50    5.90
 -10  -2   2   34.70    5.10
 -10  -2   2   43.50    5.10
 -10  -2   2   41.00    4.70
 -10  -2   2   37.90    4.70
 -10  -2   2   33.40    4.10
 -10  -2   2   38.50    5.60
 -10  -2   2   29.90    4.80
 -10  -2   2   35.50    5.00
 -10  -2   2   50.09    6.00
 -10   2   2   37.20    4.20
 -10   2   2   32.00    5.00
 -10   2   2   36.30    6.00
 -10   2   2   65.49   15.20
 -10   2   2   37.50    4.90
 -10   2   2   34.50    9.30
 -10   2   2   50.39    9.20
 -10   2   2   39.20    4.20
 -10   2   2   37.50    5.70
 -10   2   2   38.70    6.20
 -10   2   2   43.50   11.30
 -10   2   2   33.00    6.00
 -10   2   2   36.00    6.90
 -10   2   2   32.70    6.00
 -10   2   2   40.40    4.40
 -10   2   2   67.89   22.60
 -10   2   2   37.20    7.60
  -9  -2   2  120.99    9.70
  -9  -2   2  113.09    7.90
  -9  -2   2  125.69   11.40
  -9  -2   2  107.49    9.30
  -9  -2   2  110.09   10.10
  -9  -2   2  107.49   11.00
  -9  -2   2  111.29    9.70
  -9  -2   2  103.29    9.10
  -9  -2   2  101.09    9.20
  -9  -2   2  118.99    9.00
  -9  -2   2   96.99    8.10
  -9  -2   2  108.89    8.60
  -9  -2   2   93.59   14.90
  -9   2   2  106.19    9.80
  -9   2   2  103.69   10.60
  -9   2   2  114.49   10.70
  -9   2   2  111.29   10.80
  -9   2   2  104.49    9.50
  -9   2   2  110.29   10.10
  -9   2   2   94.49    7.50
  -9   2   2  103.79    8.30
  -9   2   2  113.59    8.10
  -9   2   2  102.99   10.20
  -9   2   2  147.59   25.00
  -9   2   2  115.39   14.70
  -9   2   2  112.79   14.40
  -9   2   2   94.49    9.50
  -9   2   2  114.19    8.30
  -9   2   2   91.29   14.10
  -9   2   2   98.49   10.40
  -9   2   2  113.79   10.70
  -9   2   2  128.49   17.90
  -9   2   2  101.59    9.90
  -8  -2   2  445.26   24.20
  -8  -2   2  444.96   22.20
  -8  -2   2  432.36   20.60
  -8  -2   2  410.76   24.70
  -8  -2   2  450.75   21.50
  -8  -2   2  421.96   24.00
  -8  -2   2  449.46   21.50
  -8  -2   2  462.15   24.80
  -8  -2   2  447.16   23.30
  -8  -2   2  414.16   19.50
  -8  -2   2  407.86   21.80
  -8  -2   2  414.36   23.40
  -8  -2   2  437.06   21.50
  -8  -2   2  434.16   21.60
  -8  -2   2  467.85   23.60
  -8   2   2  453.25   24.40
  -8   2   2  445.66   28.60
  -8   2   2  430.66   22.20
  -8   2   2  432.36   24.40
  -8   2   2  427.56   20.80
  -8   2   2  424.86   22.40
  -8   2   2  472.75   28.30
  -8   2   2  436.36   22.80
  -8   2   2  432.26   22.40
  -8   2   2  412.06   22.90
  -8   2   2  445.56   23.90
  -8   2   2  423.56   19.90
  -8   2   2  434.86   26.60
  -8   2   2  395.56   24.50
  -8   2   2  425.56   24.60
  -8   2   2  428.36   19.90
  -8   2   2  420.76   24.20
  -8   2   2  412.56   34.40
   8   2  -2  448.86  164.98
  -8   2   2  442.66   23.50
  -8   2   2  427.16   23.00
  -8   2   2  418.56   20.20
  -7  -2   2  239.98   13.30
  -7  -2   2  241.98   12.30
  -7  -2   2  239.18   12.70
  -7  -2   2  246.38   16.60
  -7  -2   2  225.18   13.50
  -7  -2   2  240.78   15.50
  -7  -2   2  237.98   13.70
  -7  -2   2  238.88   15.40
  -7  -2   2  183.38   19.80
   7  -2  -2  222.28   86.19
  -7  -2   2  237.88   13.20
  -7  -2   2  225.58   15.40
   7  -2  -2  263.87   94.59
  -7  -2   2  245.68   15.60
   7  -2  -2  340.87   75.79
  -7  -2   2  243.88   15.60
  -7  -2   2  270.17   24.00
  -7  -2   2  246.38   14.70
  -7   2   2  227.18   14.70
  -7   2   2  209.48   14.10
  -7   2   2  225.38   14.80
  -7   2   2  236.98   15.50
  -7   2   2  255.27   23.00
  -7   2   2  236.18   14.40
  -7   2   2  229.98   14.30
  -7   2   2  231.38   12.30
  -7   2   2  206.98   20.80
  -7   2   2  238.88   17.60
  -7   2   2  217.88   16.50
  -7   2   2  240.18   14.10
   7   2  -2  358.26   56.69
  -7   2   2  241.18   17.00
  -7   2   2  240.88   15.80
  -7   2   2  257.27   20.40
   7   2  -2  310.97   91.89
  -7   2   2  227.48   12.30
   7   2  -2  216.68  111.59
  -7   2   2  212.58   13.70
   6  -2  -2  868.41  125.39
   6  -2  -2  865.71   55.69
   6  -2  -2  820.62   53.99
   6   2  -2  866.61  124.59
   6   2  -2  893.71   88.79
   5  -2  -2  317.07   29.00
   5  -2  -2  357.26   71.39
   5  -2  -2  295.17   26.00
   5   2  -2  220.78   65.19
   5   2  -2  367.06   50.29
   4  -2  -2 3259.17  134.79
   4  -2  -2 3174.38  123.19
   4   2  -2 3062.79  222.78
   4   2  -2 3074.49  169.78
   3  -2  -2  745.93   43.30
   3  -2  -2  682.63   26.50
   3  -2  -2  694.33   27.70
   3   2  -2  644.84   60.59
   3   2  -2  733.03   92.29
  -2  -2   2 4366.96  156.98
  -2  -2   2 4096.29  147.19
   2  -2  -2 4326.47  163.88
   2   2  -2 4286.67  233.58
  -1  -2   2 3571.54  133.19
   1  -2  -2 3550.24  139.39
   1  -2  -2 3277.57  167.68
  -1  -2   2 3077.19  187.28
   1   2  -2 3185.38  181.68
  -1   2   2 4061.99  123.59
  -1   2   2 3589.04  123.29
   1   2  -2 3823.02  161.48
  -1   2   2 3961.70  168.28
   0  -2  -2 4198.08  154.18
   0  -2   2 4404.36  194.28
   0  -2  -2 4009.60  182.58
   0  -2   2 3685.13  146.69
   0   2   2 3552.24  170.58
   0   2  -2 4128.69  162.68
   0   2   2 3934.71  195.88
   1  -2   2 7100.89  265.17
  -1  -2  -2 7622.64  268.27
  -1  -2  -2 7365.16  305.77
  -1   2  -2 7771.52  268.67
  -1   2  -2 7441.36  265.07
   1   2   2 7229.58  291.37
   1   2   2 6945.21  335.07
  -2  -2  -2 4162.48  211.78
  -2  -2  -2 3974.60  162.28
   2  -2   2 4520.15  172.98
   2  -2   2 4340.57  166.98
   2   2   2 4008.90  188.68
   2   2   2 3764.12  238.78
   3  -2   2  757.22   61.99
   3  -2   2  825.22   53.79
   3   2   2  565.24   89.39
   3   2   2  719.83   64.59
   4  -2   2 1384.76   82.79
  -4  -2  -2 1375.16   53.39
   4  -2   2 1156.48   62.69
   4  -2   2 1189.18   97.59
   4   2   2 1398.46  102.69
   4   2   2 1226.08  146.89
   5  -2   2  112.89   28.50
  -5  -2  -2  130.79   11.60
   5  -2   2  158.58   39.20
   5   2   2  194.38   50.59
   5   2   2   70.09   42.60
  -6  -2  -2  589.14   26.00
  -6  -2  -2  570.14   25.50
  -6  -2  -2  602.74   26.00
  -6  -2  -2  586.54   27.10
  -6  -2  -2  602.54   28.50
  -6  -2  -2  578.74   26.40
  -6  -2  -2  635.54   30.70
  -6  -2  -2  584.04   24.90
   6  -2   2  516.75   91.39
   6  -2   2  564.94   57.19
  -6   2  -2  581.64   29.40
  -6   2  -2  589.24   25.10
  -6   2  -2  568.44   28.60
  -6   2  -2  590.24   31.70
  -6   2  -2  614.54   29.70
   6   2   2  443.06  112.99
   6   2   2  598.34   79.19
  -6   2  -2  613.84   29.50
  -6   2  -2  640.74   30.00
  -6   2  -2  612.04   30.50
  -6   2  -2  615.74   28.20
  -6   2  -2  615.74   28.30
  -6   2  -2  606.44   27.10
  -6   2  -2  592.14   29.60
  -6   2  -2  630.34   30.20
  -7  -2  -2  185.08   15.20
  -7  -2  -2  173.98   13.60
  -7  -2  -2  196.88   12.10
   7  -2   2  197.68   47.00
  -7  -2  -2  184.28   11.60
  -7  -2  -2  186.08   12.10
  -7  -2  -2  192.78   13.20
  -7  -2  -2  186.58   13.90
  -7  -2  -2  184.48   11.30
  -7  -2  -2  192.78   13.90
  -7  -2  -2  181.58   12.40
  -7  -2  -2  181.68   12.10
  -7  -2  -2  182.18   13.30
  -7   2  -2  206.38   19.10
  -7   2  -2  179.68   14.30
  -7   2  -2  175.98   13.30
  -7   2  -2  185.08   11.50
  -7   2  -2  190.98   13.60
   7   2   2  155.28   84.19
  -7   2  -2  168.08   13.10
  -7   2  -2  165.68   10.90
  -7   2  -2  187.78   11.50
  -7   2  -2  193.28   15.40
  -7   2  -2  181.58   14.40
  -7   2  -2  188.68   12.90
  -7   2  -2  179.08   14.30
  -7   2  -2  188.68   14.60
  -7   2  -2  186.48   11.70
  -7   2  -2  190.18   15.00
  -7   2  -2  229.88   18.00
  -7   2  -2  191.58   14.80
  -7   2  -2  180.78   13.90
  -8  -2  -2  357.66   18.90
  -8  -2  -2  368.46   20.40
  -8  -2  -2  387.06   19.30
  -8  -2  -2  340.77   19.00
  -8  -2  -2  355.76   21.80
  -8  -2  -2  366.86   19.90
   8  -2   2  452.55   54.69
  -8  -2  -2  358.36   21.40
  -8  -2  -2  362.46   18.40
  -8  -2  -2  343.07   20.70
  -8  -2  -2  358.16   21.20
  -8  -2  -2  360.76   24.00
  -8  -2  -2  363.36   21.70
  -8   2  -2  385.16   25.90
  -8   2  -2  389.96   20.70
  -8   2  -2  367.06   22.70
  -8   2  -2  372.96   22.70
  -8   2  -2  377.66   18.80
  -8   2  -2  376.26   23.20
  -8   2  -2  399.66   23.40
  -8   2  -2  355.36   18.50
   8   2   2  386.76   57.69
  -8   2  -2  384.66   23.90
  -8   2  -2  351.56   21.20
  -8   2  -2  353.96   28.10
  -8   2  -2  376.26   22.60
   8   2   2  302.17  122.99
  -8   2  -2  359.36   23.20
  -8   2  -2  346.47   19.00
  -8   2  -2  385.16   22.00
  -8   2  -2  371.66   21.70
  -8   2  -2  351.26   17.70
  -8   2  -2  351.96   21.40
  -9  -2  -2   54.09    8.70
  -9  -2  -2   41.50    5.70
  -9  -2  -2   45.00   10.30
  -9  -2  -2   47.90    6.30
  -9  -2  -2   45.80    6.60
  -9  -2  -2   50.99    6.70
  -9  -2  -2   54.89    7.20
  -9  -2  -2   53.49    8.50
  -9  -2  -2   54.69    6.80
  -9   2  -2   52.99    7.60
  -9   2  -2   51.49    6.80
  -9   2  -2   38.70   13.00
  -9   2  -2   53.29    9.10
  -9   2  -2   48.20    8.40
  -9   2  -2   53.19    8.10
  -9   2  -2   35.20    9.00
  -9   2  -2   46.10    5.70
  -9   2  -2   70.29   10.20
  -9   2  -2   52.19    7.00
  -9   2  -2   63.09    9.50
  -9   2  -2   55.09    6.50
  -9   2  -2   59.89   14.80
 -10  -2  -2   35.60    6.70
 -10  -2  -2   43.30    5.00
 -10  -2  -2   46.70    5.50
 -10  -2  -2   42.70    5.90
 -10  -2  -2   36.20    5.40
 -10  -2  -2   38.60    5.10
 -10  -2  -2   49.60    7.80
 -10  -2  -2   30.80    4.90
 -10  -2  -2   44.20    5.10
 -10  -2  -2   42.00    5.90
 -10   2  -2   27.40    5.20
 -10   2  -2   37.80    5.70
 -10   2  -2   38.10    7.10
 -10   2  -2   41.00    6.10
 -10   2  -2   39.90    5.90
 -10   2  -2   45.50    8.80
 -10   2  -2   32.00    4.80
 -10   2  -2   38.70    7.00
 -10   2  -2   40.00    6.40
 -10   2  -2   41.10    6.40
 -11  -2  -2   41.30    4.50
 -11  -2  -2   46.30    5.00
 -11  -2  -2   41.10    4.80
 -11  -2  -2   48.30    5.30
 -11  -2  -2   49.00    6.50
 -11  -2  -2   39.70    4.00
 -11   2  -2   34.20    7.40
 -11   2  -2   50.59    7.30
 -11   2  -2   40.00    5.60
 -11   2  -2   60.69    7.30
 -11   2  -2   56.09    6.50
 -11   2  -2   48.80    5.50
 -12  -3   2  206.98   11.50
 -11  -3   2   48.20    4.70
 -11  -3   2   47.20    5.10
 -11  -3   2   46.30    4.40
 -11  -3   2   38.90    5.10
 -11  -3   2   49.30    4.80
 -11  -3   2   49.10    5.20
 -11  -3   2   46.10    6.00
 -11   3   2   61.19    7.60
 -11   3   2   47.50    4.70
 -11   3   2   76.29    9.00
 -11   3   2   45.10    6.60
 -11   3   2   58.79    7.20
 -10  -3   2   15.70    4.10
 -10  -3   2   12.20    3.00
 -10  -3   2   12.00    3.10
 -10  -3   2   10.00    2.60
 -10  -3   2    9.10    3.00
 -10  -3   2    8.90    2.70
 -10  -3   2   10.40    3.20
 -10  -3   2    9.40    3.20
 -10  -3   2   12.90    4.00
 -10   3   2    9.90    3.50
 -10   3   2   21.40    7.20
 -10   3   2    8.50    2.60
 -10   3   2    9.60    2.40
 -10   3   2   19.90    6.50
 -10   3   2   12.90    4.30
 -10   3   2   11.00    5.40
 -10   3   2   16.30    7.00
 -10   3   2   18.20    6.90
 -10   3   2   44.50   12.90
 -10   3   2   16.40    4.60
 -10   3   2   48.70   20.30
 -10   3   2    8.60    2.50
 -10   3   2   11.00    3.50
 -10   3   2   10.60    3.90
 -10   3   2    9.40    2.80
  -9  -3   2 1072.69   44.30
  -9  -3   2 1063.39   48.10
  -9  -3   2 1094.49   44.60
  -9  -3   2 1075.09   41.70
  -9  -3   2 1093.09   45.10
  -9  -3   2 1072.29   42.80
  -9  -3   2 1083.69   47.60
  -9  -3   2 1113.09   46.30
  -9  -3   2 1137.29   44.00
  -9  -3   2 1135.49   43.50
  -9  -3   2 1111.99   44.80
  -9  -3   2 1059.39   44.60
  -9   3   2 1048.60   45.00
  -9   3   2 1026.80   47.50
  -9   3   2 1025.00   46.90
  -9   3   2 1085.29   46.60
  -9   3   2 1006.70   45.70
  -9   3   2 1066.89   42.00
  -9   3   2 1045.80   46.80
  -9   3   2 1136.79   53.19
  -9   3   2 1053.49   45.70
  -9   3   2 1163.38   62.89
  -9   3   2 1036.90   48.30
  -9   3   2 1055.59   41.50
  -9   3   2 1070.19   44.70
  -9   3   2 1143.19   47.50
  -9   3   2 1051.69   44.90
  -9   3   2 1103.39   51.29
  -9   3   2 1074.29   42.80
  -9   3   2 1081.29   52.49
  -9   3   2 1104.79   42.30
  -8  -3   2  115.89    9.30
  -8  -3   2  124.29   10.00
  -8  -3   2  124.29    9.10
  -8  -3   2  126.69    9.50
  -8  -3   2  112.39   10.00
  -8  -3   2  126.59    9.00
  -8  -3   2   85.29   10.40
  -8  -3   2  122.19   15.10
  -8  -3   2  136.79   11.80
  -8  -3   2  127.99    9.40
  -8  -3   2  132.49   10.80
  -8  -3   2  120.99    9.90
   8   3  -2  123.79  101.79
  -8   3   2  121.19    9.70
  -8   3   2  119.39   10.90
  -8   3   2  106.59   11.80
  -8   3   2  119.99   10.30
  -8   3   2  123.29    8.30
  -8   3   2  113.99   11.60
  -8   3   2  132.09   14.50
  -8   3   2  119.79    8.90
  -8   3   2  115.69   10.70
  -8   3   2  123.49   11.10
  -8   3   2  122.09   13.30
  -8   3   2  127.09   11.30
  -8   3   2  132.09   14.90
  -8   3   2  139.69   18.60
  -8   3   2  112.49    8.50
  -8   3   2  116.09   15.40
  -8   3   2  121.69   10.10
  -8   3   2  124.69   11.90
  -8   3   2  129.29   10.80
  -7  -3   2  186.68   11.60
  -7  -3   2  193.28   13.70
  -7  -3   2  179.88   11.40
  -7  -3   2  178.68   12.00
  -7  -3   2  181.98   10.90
   7  -3  -2  156.28   66.89
  -7  -3   2  191.08   10.40
  -7  -3   2  175.38   11.60
  -7  -3   2  179.58   12.40
  -7  -3   2  189.38   11.40
  -7  -3   2  195.68   13.50
  -7  -3   2  154.38   14.50
  -7  -3   2  191.78   13.70
  -7  -3   2  178.68   12.40
  -7  -3   2  189.58   11.60
   7  -3  -2  241.68   96.89
  -7   3   2  190.38   10.90
   7   3  -2  124.89   90.49
  -7   3   2  191.08   12.30
  -7   3   2  192.08   13.50
  -7   3   2  181.48   12.30
  -7   3   2  195.98   16.50
  -7   3   2  188.38   16.30
  -7   3   2  200.28   14.80
  -7   3   2  183.88   13.10
  -7   3   2  203.68   13.40
  -7   3   2  171.88   11.10
  -7   3   2  197.68   10.80
  -7   3   2  179.68   10.80
   7   3  -2  108.59   75.29
  -7   3   2  192.78   13.50
  -7   3   2  206.98   14.30
  -7   3   2  193.38   15.70
  -7   3   2  177.48   14.80
  -7   3   2  187.18   13.60
  -7   3   2  199.78   20.00
  -7   3   2  199.48   13.20
   7   3  -2  258.47   55.49
  -7   3   2  183.68   15.50
  -7   3   2  199.18   14.60
   6  -3  -2   95.29   22.60
   6  -3  -2  133.19   54.69
   6   3  -2   37.70   43.00
   6   3  -2   68.59   53.89
   6   3  -2  168.28   30.10
   5  -3  -2  392.46   38.60
   5  -3  -2  386.76   21.30
  -5  -3   2  393.86   19.70
   5   3  -2  405.16   80.39
   5   3  -2  420.96   54.59
   4  -3  -2  359.96   33.40
  -4  -3   2  340.27   18.50
   4   3  -2  350.16   69.09
   4   3  -2  373.66   47.00
   3  -3  -2 3140.19  132.79
   3   3  -2 2810.42  154.88
   3   3  -2 3019.00  210.08
  -2  -3   2 1096.19   52.79
  -2  -3   2 1142.99   49.80
   2  -3  -2 1140.79   61.49
   2   3  -2 1018.90   74.89
   2   3  -2 1177.48  105.89
  -1  -3   2   33.00    9.40
  -1  -3   2   20.40    6.20
   1  -3  -2   21.30    7.00
   1   3  -2   15.80   19.20
   1   3  -2   34.50   12.40
  -1   3   2   26.60    4.60
  -1   3   2   33.00   16.80
   0  -3   2 4399.46  163.58
   0  -3   2 4388.86  219.88
   0  -3  -2 4481.05  173.78
   0   3  -2 4613.84  182.68
   0   3   2 4153.28  200.18
   0   3  -2 4310.97  202.68
   0   3   2 4304.97  222.38
   1  -3   2 1940.21   86.29
   1  -3   2 2285.97  118.99
  -1  -3  -2 2051.59   92.79
  -1   3  -2 1687.23   91.99
  -1   3  -2 2131.79   99.49
   1   3   2 1883.51  147.69
   1   3   2 2191.28  122.89
  -1   3  -2 2134.19   95.89
  -2  -3  -2 1167.48   63.39
   2  -3   2 1201.68   61.99
   2  -3   2 1148.29   61.19
   2   3   2 1154.98   89.29
  -3  -3  -2  189.48   13.20
   3  -3   2  220.68   23.70
  -3  -3  -2  171.88   20.40
   3   3   2  195.28   38.10
   3   3   2  133.49   58.49
   4  -3   2  295.97   32.60
   4  -3   2  304.87   22.80
  -4  -3  -2  251.07   17.30
   4   3   2  281.67   89.49
   4   3   2  322.67   51.99
   5  -3   2  523.85   47.70
  -5  -3  -2  486.45   26.70
   5   3   2  564.34   70.09
   5   3   2  378.46   88.19
  -6  -3  -2   78.49    7.90
  -6  -3  -2   85.19    8.10
  -6  -3  -2   84.39    8.90
   6  -3   2  110.39   25.20
  -6  -3  -2   86.99    7.00
  -6  -3  -2   90.29    9.30
  -6  -3  -2   85.19    6.80
  -6  -3  -2   67.09    6.20
  -6  -3  -2   70.99    7.10
  -6  -3  -2   83.39    9.90
  -6  -3  -2   79.09   11.60
   6   3   2   79.69   53.49
  -6   3  -2   85.79   10.20
  -6   3  -2   76.39   10.10
  -6   3  -2   87.59    8.50
  -6   3  -2   74.99    8.20
  -6   3  -2   83.49    9.50
  -6   3  -2   73.69    8.10
  -6   3  -2   80.19    6.50
  -6   3  -2   82.79    7.50
  -6   3  -2   78.09    9.20
  -6   3  -2   69.19   10.00
  -6   3  -2   87.69    9.20
  -6   3  -2   84.89   11.40
  -7  -3  -2  514.75   24.40
  -7  -3  -2  497.25   26.30
  -7  -3  -2  532.05   23.30
  -7  -3  -2  543.55   29.20
  -7  -3  -2  532.85   24.60
  -7  -3  -2  527.55   25.10
  -7  -3  -2  513.35   26.70
  -7  -3  -2  541.15   25.90
  -7  -3  -2  543.45   24.80
  -7  -3  -2  514.05   24.10
  -7  -3  -2  504.05   26.10
  -7  -3  -2  514.35   26.90
   7  -3   2  495.05   59.49
  -7   3  -2  550.74   27.70
  -7   3  -2  517.25   26.90
  -7   3  -2  517.55   27.50
  -7   3  -2  509.85   31.10
  -7   3  -2  536.25   25.80
  -7   3  -2  544.45   29.40
  -7   3  -2  546.05   29.00
  -7   3  -2  568.64   34.90
  -7   3  -2  527.15   23.60
  -7   3  -2  529.05   27.40
  -7   3  -2  529.55   28.80
  -7   3  -2  509.55   28.10
  -7   3  -2  506.05   28.00
  -7   3  -2  522.35   29.10
  -7   3  -2  509.35   23.60
  -7   3  -2  518.35   24.00
   7   3   2  332.47  110.09
  -7   3  -2  485.85   24.70
  -8  -3  -2  218.38   13.70
  -8  -3  -2  220.88   17.50
  -8  -3  -2  205.58   14.00
  -8  -3  -2  224.78   15.60
  -8  -3  -2  237.38   14.10
  -8  -3  -2  196.78   14.30
  -8  -3  -2  214.58   14.90
  -8  -3  -2  219.78   13.90
  -8  -3  -2  198.18   15.10
  -8  -3  -2  213.78   15.20
  -8  -3  -2  230.08   13.80
  -8   3  -2  224.38   21.00
  -8   3  -2  213.28   15.60
  -8   3  -2  222.68   17.30
  -8   3  -2  240.68   17.00
  -8   3  -2  210.98   13.30
  -8   3  -2  223.88   14.90
  -8   3  -2  224.78   16.80
  -8   3  -2  197.08   12.90
  -8   3  -2  228.08   18.70
  -8   3  -2  205.18   15.20
  -8   3  -2  215.88   16.50
  -8   3  -2  224.38   17.30
  -8   3  -2  241.28   13.80
  -8   3  -2  237.88   16.70
  -8   3  -2  245.18   19.90
   8   3   2  606.04  246.78
  -8   3  -2  215.18   15.70
  -8   3  -2  232.48   18.00
  -9  -3  -2   29.50    5.90
  -9  -3  -2   23.10    5.10
  -9  -3  -2   32.40    4.80
  -9  -3  -2   33.60    6.20
  -9  -3  -2   36.70    5.90
  -9  -3  -2   31.50    5.50
  -9  -3  -2   36.80    6.10
  -9  -3  -2   27.80    5.10
  -9  -3  -2   27.70    4.80
  -9  -3  -2   27.50    5.00
  -9   3  -2   33.70    7.60
  -9   3  -2   31.10   10.90
  -9   3  -2   25.50    6.00
  -9   3  -2   31.60    6.40
  -9   3  -2   28.00    6.20
  -9   3  -2   28.80    5.40
  -9   3  -2   28.50    8.00
  -9   3  -2   29.10    6.20
  -9   3  -2   24.20    5.90
  -9   3  -2   26.00    6.10
  -9   3  -2   30.90    7.80
  -9   3  -2   28.50    6.30
 -10  -3  -2    3.20    2.00
 -10  -3  -2   -3.20    4.30
 -10  -3  -2    3.70    1.60
 -10  -3  -2    2.40    1.90
 -10  -3  -2    0.20    1.60
 -10  -3  -2    3.50    1.80
 -10  -3  -2    1.00    1.50
 -10  -3  -2    0.50    1.70
 -10   3  -2   -1.50    2.70
 -10   3  -2   -0.40    1.80
 -10   3  -2   -1.70   12.20
 -10   3  -2    5.70    4.10
 -10   3  -2    6.50    3.60
 -10   3  -2    4.00    2.60
 -10   3  -2    3.70    2.70
 -10   3  -2    6.30    4.70
 -10   3  -2    1.90    2.00
 -11  -3  -2   40.60    4.30
 -11  -3  -2   35.50    4.10
 -11  -3  -2   43.70    6.00
 -11  -3  -2   42.00    3.70
 -11  -3  -2   41.10    4.10
 -11  -3  -2   40.30    4.60
 -11   3  -2   30.30    7.30
 -11   3  -2   34.20    5.60
 -11   3  -2   38.70    5.80
 -11   3  -2   28.40    5.00
 -11   3  -2   23.10    5.90
 -12  -4   2   25.70    3.20
 -12  -4   2   33.20    3.40
 -11  -4   2   78.99    6.20
 -11  -4   2   61.89    5.20
 -11  -4   2   70.59    5.90
 -11  -4   2   69.59    7.30
 -11  -4   2   57.59    5.80
 -11  -4   2   77.49    5.60
 -11  -4   2   69.89    5.80
 -11   4   2   62.39    6.90
 -10  -4   2  288.37   18.60
 -10  -4   2  301.77   15.80
 -10  -4   2  308.67   14.30
 -10  -4   2  279.07   16.90
 -10  -4   2  300.57   16.70
 -10  -4   2  307.67   16.50
 -10  -4   2  308.77   15.50
 -10  -4   2  318.57   16.90
 -10   4   2  311.57   21.80
 -10   4   2  301.77   18.70
 -10   4   2  310.77   17.40
 -10   4   2  334.27   23.60
 -10   4   2  312.77   19.60
 -10   4   2  324.57   17.60
 -10   4   2  349.17   32.40
 -10   4   2  241.38   17.50
 -10   4   2  320.97   14.90
 -10   4   2  313.07   18.60
 -10   4   2  307.07   18.00
 -10   4   2  288.67   16.00
 -10   4   2  331.67   19.50
 -10   4   2  290.37   13.60
 -10   4   2  361.46   25.80
 -10   4   2  241.98   21.60
  -9  -4   2  634.04   27.30
  -9  -4   2  611.34   28.30
  -9  -4   2  601.94   28.30
  -9  -4   2  594.84   25.60
  -9  -4   2  646.34   32.00
  -9  -4   2  616.64   27.80
  -9  -4   2  630.04   29.00
  -9  -4   2  636.94   29.80
  -9  -4   2  568.64   28.20
  -9  -4   2  641.44   27.50
  -9  -4   2  609.34   28.50
  -9   4   2  625.54   28.90
  -9   4   2  645.64   30.90
  -9   4   2  668.63   29.60
  -9   4   2  630.44   30.90
  -9   4   2  574.94   30.70
  -9   4   2  601.34   35.60
  -9   4   2  619.54   29.80
  -9   4   2  619.64   31.70
  -9   4   2  668.23   37.50
  -9   4   2  605.94   35.10
  -9   4   2  672.63   31.50
  -9   4   2  544.85   31.00
  -9   4   2  607.24   25.70
  -9   4   2  678.53   44.30
  -9   4   2  580.34   36.90
  -9   4   2  596.64   26.00
  -9   4   2  638.34   29.10
  -8  -4   2  167.58   11.50
  -8  -4   2  165.18   10.90
  -8  -4   2  178.18   14.20
  -8  -4   2  174.48   12.40
  -8  -4   2  178.88   11.70
  -8  -4   2  182.88   14.10
  -8  -4   2  187.08   10.40
  -8  -4   2  177.38   12.80
  -8  -4   2  179.48   11.30
  -8  -4   2  179.98   11.60
  -8  -4   2  170.48   12.30
  -8  -4   2  173.88   11.90
  -8   4   2  154.08   15.10
  -8   4   2  167.48   12.60
  -8   4   2  144.99   14.30
  -8   4   2  168.68   13.50
  -8   4   2  163.38   10.20
  -8   4   2  182.28   13.70
  -8   4   2  170.08   14.10
  -8   4   2  172.08   16.40
   8   4  -2   45.90   75.59
  -8   4   2  163.38   15.70
  -8   4   2  158.88   10.80
  -8   4   2  169.38   11.90
  -8   4   2  171.28   12.30
  -8   4   2  190.58   18.10
  -8   4   2  175.08   14.20
  -8   4   2  175.88   17.80
  -8   4   2  177.88   21.10
  -8   4   2  182.38   10.50
  -8   4   2  184.28   13.70
  -8   4   2  172.68   10.50
  -7  -4   2  137.39    9.70
  -7  -4   2  132.69    9.30
  -7  -4   2  126.89   10.10
  -7  -4   2  125.39   10.20
   7  -4  -2  132.39   51.19
  -7  -4   2  134.89    8.30
  -7  -4   2  134.99   11.40
  -7  -4   2  133.69    9.30
  -7  -4   2  144.19    9.80
  -7  -4   2  132.49    9.50
  -7  -4   2  130.59   10.30
  -7  -4   2  137.09   11.50
   7   4  -2  237.48   98.09
  -7   4   2  128.39   12.80
  -7   4   2  136.79   14.20
  -7   4   2  146.29   10.50
  -7   4   2  129.09   12.80
  -7   4   2  133.79    8.60
  -7   4   2  151.48   11.90
  -7   4   2  146.59   14.30
  -7   4   2  132.39    9.20
  -7   4   2  141.09    8.80
  -7   4   2  129.69   12.60
  -7   4   2  149.29   11.20
  -7   4   2  139.09   11.50
  -7   4   2  133.69   11.00
  -7   4   2  141.89   17.00
  -7   4   2  154.18   12.40
   7   4  -2   76.29   56.29
  -7   4   2  140.39   13.80
  -7   4   2  122.49   10.20
  -7   4   2  131.49   11.40
   7   4  -2   78.39   40.70
   6  -4  -2  744.73  116.99
  -6  -4   2  490.05   21.70
  -6  -4   2  486.15   24.70
  -6  -4   2  506.35   22.50
  -6  -4   2  476.95   23.10
  -6  -4   2  519.65   23.70
   6  -4  -2  492.65   49.60
  -6  -4   2  451.85   23.30
  -6  -4   2  496.65   22.60
  -6  -4   2  482.65   21.60
  -6   4   2  512.95   32.30
  -6   4   2  500.25   24.90
  -6   4   2  531.65   28.20
  -6   4   2  525.55   28.50
  -6   4   2  505.45   24.50
  -6   4   2  514.25   27.20
   6   4  -2  441.66  114.69
  -6   4   2  497.05   25.20
  -6   4   2  473.65   22.90
  -6   4   2  515.75   27.60
  -6   4   2  486.85   24.80
  -6   4   2  484.25   23.40
   6   4  -2  475.95   64.49
   6   4  -2  500.95  118.59
  -5  -4   2  550.64   27.40
   5  -4  -2  544.75   50.59
   5   4  -2  617.24   94.59
   5   4  -2  552.74  115.99
   5   4  -2  683.83  128.29
  -4  -4   2   50.99    6.70
   4  -4  -2   72.79   19.70
   4   4  -2   55.59   21.60
   4   4  -2  100.69   46.30
  -3  -4   2  326.17   21.20
   3  -4  -2  313.47   33.30
  -3  -4   2  308.47   18.40
   3   4  -2  363.36   68.49
   3   4  -2  298.57   41.50
  -2  -4   2 1410.16   65.79
  -2  -4   2 1422.76   65.79
   2  -4  -2 1331.17   76.19
   2   4  -2 1365.76   90.49
   1  -4  -2  623.14   45.50
  -1  -4   2  705.43   44.50
  -1  -4   2  647.04   38.00
  -1   4   2  740.83   65.59
   1   4  -2  598.44   70.49
   1   4  -2  604.34   52.39
   0  -4  -2  313.07   30.10
   0  -4   2  329.07   24.70
   0   4   2  345.77   46.10
   0   4   2  319.67   51.59
   0   4  -2  349.87   45.10
   0   4  -2  334.27   34.30
  -1  -4  -2 1091.69   64.89
   1  -4   2 1250.67   98.99
   1  -4   2 1221.58   58.99
  -1   4  -2 1249.28   71.09
  -1   4  -2 1164.58   76.39
   1   4   2 1045.50  113.19
   1   4   2 1074.19   89.99
   2  -4   2 1706.63   83.69
   2  -4   2 1893.91  113.19
  -2  -4  -2 1799.62   70.89
  -2  -4  -2 1946.21   92.69
   2   4   2 1992.10  133.09
   2   4   2 1559.64  158.68
  -3  -4  -2 3223.58  116.89
   3  -4   2 3095.49  135.49
  -3  -4  -2 3188.48  140.79
   3   4   2 3011.40  189.28
  -4  -4  -2  459.25   25.50
   4  -4   2  507.25   41.50
   4   4   2  379.96   91.59
   4   4   2  455.85   66.99
   5  -4   2  135.19   22.90
   5   4   2  180.48   47.50
   5   4   2   65.49   44.60
  -6  -4  -2  853.81   43.50
  -6  -4  -2  955.50   39.10
  -6  -4  -2  975.50   39.60
  -6  -4  -2  950.70   38.70
  -6  -4  -2  986.40   41.20
  -6  -4  -2  984.70   43.40
   6  -4   2  900.11   69.69
  -6  -4  -2  886.11   37.50
  -6  -4  -2  990.60   39.80
  -6  -4  -2  963.00   41.30
  -6  -4  -2  942.11   39.60
  -6  -4  -2 1030.00   52.09
  -6   4  -2 1029.60   45.40
   6   4   2  985.30  124.49
  -6   4  -2  969.10   39.10
  -6   4  -2 1010.00   45.40
  -6   4  -2 1035.70   44.20
   6   4   2  848.92  158.88
  -6   4  -2  975.00   44.00
  -6   4  -2  902.51   39.00
  -6   4  -2 1051.89   51.29
  -6   4  -2  953.70   45.60
  -6   4  -2 1024.00   43.20
  -6   4  -2 1011.10   42.00
  -6   4  -2  941.81   43.80
  -6   4  -2  992.20   43.20
  -6   4  -2  957.80   38.00
  -6   4  -2  949.31   43.20
  -6   4  -2 1017.20   41.20
  -6   4  -2 1011.50   44.10
  -7  -4  -2  502.55   24.40
  -7  -4  -2  506.85   25.90
  -7  -4  -2  497.65   24.00
  -7  -4  -2  520.75   24.00
   7  -4   2  611.04   56.39
  -7  -4  -2  527.65   25.00
  -7  -4  -2  532.25   28.80
  -7  -4  -2  496.75   24.70
  -7  -4  -2  513.65   26.20
  -7  -4  -2  515.55   26.70
   7  -4   2  497.95   70.29
  -7  -4  -2  536.15   26.40
  -7  -4  -2  525.75   25.40
  -7   4  -2  509.25   28.00
  -7   4  -2  511.55   23.80
  -7   4  -2  521.15   25.70
  -7   4  -2  503.05   27.30
  -7   4  -2  541.95   28.30
   7   4   2  408.16   39.70
  -7   4  -2  576.74   35.30
  -7   4  -2  490.75   23.50
  -7   4  -2  484.55   23.10
  -7   4  -2  502.85   26.60
  -7   4  -2  519.35   28.50
  -7   4  -2  545.95   28.40
  -7   4  -2  522.25   32.10
  -7   4  -2  507.65   29.20
  -7   4  -2  501.45   29.50
   7   4   2  368.46  120.79
  -7   4  -2  498.45   24.30
  -7   4  -2  539.35   30.50
  -7   4  -2  544.05   29.40
  -7   4  -2  504.95   28.60
  -8  -4  -2   35.70    5.90
  -8  -4  -2   34.30    5.80
  -8  -4  -2   41.20    5.90
  -8  -4  -2   30.30    4.60
  -8  -4  -2   35.10    5.50
  -8  -4  -2   35.10    5.20
  -8  -4  -2   42.80    7.10
  -8  -4  -2   38.00    5.00
  -8  -4  -2   36.90    5.40
  -8  -4  -2   33.50    5.10
  -8   4  -2   35.60    7.80
  -8   4  -2   40.40    6.10
  -8   4  -2   44.90    9.70
  -8   4  -2   40.30    6.70
  -8   4  -2   31.60    6.00
  -8   4  -2   42.40    6.20
  -8   4  -2   37.70    7.80
  -8   4  -2   30.80    6.20
  -8   4  -2   37.90    7.70
  -8   4  -2   34.10    9.40
  -8   4  -2   36.10    7.50
  -8   4  -2   31.80    6.70
  -8   4  -2   36.50    9.20
  -9  -4  -2   -0.40    1.90
  -9  -4  -2    0.00    2.80
  -9  -4  -2    0.70    1.30
  -9  -4  -2   -0.60    1.50
  -9  -4  -2    1.20    2.00
  -9  -4  -2    2.30    1.90
  -9  -4  -2   -0.30    2.40
  -9  -4  -2    1.30    2.10
  -9  -4  -2    2.10    1.90
  -9   4  -2    0.50    4.50
  -9   4  -2    3.10    2.60
  -9   4  -2   -0.60    4.70
  -9   4  -2    1.90    2.30
  -9   4  -2    0.00    2.00
  -9   4  -2    0.30    3.10
  -9   4  -2    1.80    2.20
  -9   4  -2    2.80    1.90
  -9   4  -2    4.20    4.60
  -9   4  -2   -0.50    1.50
  -9   4  -2    6.70    4.40
 -10  -4  -2  122.59    9.20
 -10  -4  -2  136.89    9.20
 -10  -4  -2  142.99   10.50
 -10  -4  -2  157.68   13.00
 -10  -4  -2  135.49   11.60
 -10  -4  -2  132.49    9.10
 -10  -4  -2  143.09    9.00
 -10   4  -2  143.99   10.90
 -10   4  -2  147.89   12.50
 -10   4  -2  149.39   11.40
 -10   4  -2  145.99   12.10
 -10   4  -2  120.19   10.00
 -10   4  -2  121.59   11.70
 -10   4  -2  148.69   12.40
 -11  -4  -2   20.50    4.80
 -11  -4  -2   21.40    2.30
 -11  -4  -2   15.20    2.50
 -11  -4  -2   27.50    3.50
 -11  -4  -2   28.00    4.10
 -11  -4  -2   16.20    4.20
 -11   4  -2   12.60    4.70
 -11   4  -2   17.80    4.80
 -11   4  -2   15.70    5.30
 -11   4  -2   21.90    6.40
 -11  -5   2   40.30    3.70
 -11  -5   2   36.30    4.90
 -11  -5   2   35.30    3.90
 -11  -5   2   39.10    4.00
 -11  -5   2   31.90    3.80
 -11  -5   2   37.90    4.10
 -10  -5   2  112.99    8.70
 -10  -5   2  110.59    8.50
 -10  -5   2  108.19   10.00
 -10  -5   2  110.59    8.00
 -10  -5   2  104.59    7.50
 -10  -5   2  105.39    8.20
 -10  -5   2  103.09    7.90
 -10   5   2  100.49    8.90
 -10   5   2  122.29   12.60
 -10   5   2  144.29   18.60
 -10   5   2  100.09   14.20
 -10   5   2  121.69    9.70
 -10   5   2  105.99    7.20
 -10   5   2   92.69    7.70
 -10   5   2  108.59    9.20
 -10   5   2  138.69   22.40
  -9  -5   2  239.48   16.70
  -9  -5   2  213.68   12.70
  -9  -5   2  224.28   13.50
  -9  -5   2  239.98   14.10
  -9  -5   2  208.18   13.50
  -9  -5   2  237.08   14.80
  -9  -5   2  204.78   13.20
  -9  -5   2  222.88   11.60
  -9  -5   2  212.98   13.50
  -9   5   2  276.27   23.00
  -9   5   2  228.58   16.50
  -9   5   2  251.27   20.40
  -9   5   2  231.88   14.40
  -9   5   2  224.28   19.50
  -9   5   2  234.68   17.50
  -9   5   2  254.77   25.80
  -9   5   2  247.98   18.10
  -9   5   2  310.17   27.30
  -9   5   2  239.28   18.40
  -9   5   2  228.68   12.20
  -9   5   2  235.28   19.00
  -9   5   2  222.78   14.00
  -9   5   2  220.08   12.30
  -9   5   2  237.48   15.50
  -9   5   2  222.08   14.40
  -8  -5   2 1441.96   57.89
  -8  -5   2 1538.35   58.89
  -8  -5   2 1367.76   53.79
  -8  -5   2 1532.85   57.19
  -8  -5   2 1518.85   56.19
  -8  -5   2 1540.75   56.99
  -8  -5   2 1560.14   61.59
  -8  -5   2 1506.55   57.19
  -8  -5   2 1405.16   57.99
  -8  -5   2 1418.46   56.99
  -8   5   2 1400.86   60.29
  -8   5   2 1467.05   59.79
  -8   5   2 1421.16   55.29
  -8   5   2 1524.85   66.29
  -8   5   2 1447.16   60.49
  -8   5   2 1452.05   58.89
  -8   5   2 1446.66   57.89
  -8   5   2 1497.05   63.99
  -8   5   2 1545.05   65.69
  -8   5   2 1424.96   57.59
  -8   5   2 1445.46   54.39
  -8   5   2 1402.16   62.59
  -8   5   2 1416.96   65.19
  -8   5   2 1532.25   74.39
  -8   5   2 1520.65   54.99
  -8   5   2 1550.04   61.29
   8   5  -2 1186.98   89.49
  -8   5   2 1548.95   62.49
  -8   5   2 1397.76   62.39
  -7  -5   2 1296.07   49.10
  -7  -5   2 1256.57   49.10
  -7  -5   2 1226.08   48.40
  -7  -5   2 1200.28   49.99
  -7  -5   2 1275.57   48.40
  -7  -5   2 1211.58   49.30
  -7  -5   2 1290.67   53.09
  -7  -5   2 1190.78   50.09
  -7  -5   2 1204.88   49.99
  -7  -5   2 1185.28   46.50
  -7   5   2 1347.57   58.29
  -7   5   2 1233.68   50.39
  -7   5   2 1296.37   53.29
  -7   5   2 1265.97   47.10
  -7   5   2 1253.97   52.49
  -7   5   2 1312.37   47.60
  -7   5   2 1289.67   52.59
  -7   5   2 1198.78   54.99
   7   5  -2 1153.18  112.09
  -7   5   2 1273.07   53.99
  -7   5   2 1175.38   47.90
  -7   5   2 1304.17   57.39
  -7   5   2 1251.27   51.99
  -7   5   2 1230.68   55.49
  -7   5   2 1283.37   50.29
  -7   5   2 1392.16   65.19
  -7   5   2 1241.18   52.69
  -7   5   2 1333.77   57.19
   7   5  -2 1141.29  200.18
   7   5  -2 1170.98   68.39
  -7   5   2 1227.98   55.29
  -6  -5   2 1043.40   40.90
  -6  -5   2 1002.30   43.70
  -6  -5   2 1010.40   42.10
  -6  -5   2 1046.80   40.90
  -6  -5   2  965.60   44.10
   6  -5  -2 1041.40   79.19
  -6  -5   2 1032.20   40.20
  -6  -5   2  999.50   41.60
  -6  -5   2 1004.80   41.90
   6   5  -2 1062.39   96.29
  -6   5   2 1098.39   47.70
  -6   5   2 1124.39   48.50
  -6   5   2 1065.19   45.60
  -6   5   2 1007.00   47.20
  -6   5   2 1055.89   44.50
  -6   5   2 1024.30   44.00
   6   5  -2  763.52  162.98
   6   5  -2 1105.79   66.89
   6   5  -2  893.21  136.29
  -6   5   2  994.10   42.10
  -6   5   2  974.10   40.30
  -6   5   2 1040.60   39.50
  -6   5   2 1037.70   45.30
  -6   5   2 1038.00   44.40
  -6   5   2 1084.19   42.60
  -6   5   2 1107.99   54.19
  -6   5   2 1011.20   44.10
  -6   5   2 1078.49   48.20
  -6   5   2 1088.09   48.70
   5  -5  -2  632.44   57.19
  -5  -5   2  577.44   29.90
   5   5  -2  592.24  101.29
   5   5  -2  603.84  133.19
   5   5  -2  531.75   64.69
   4  -5  -2  178.38   28.00
  -4  -5   2  192.08   14.70
   4   5  -2  121.69   69.79
   4   5  -2  240.48   67.49
   4   5  -2  185.68   62.49
   3  -5  -2 1834.22  102.19
  -3  -5   2 1737.53   80.29
  -3  -5   2 1766.72   71.59
   3   5  -2 1835.62  163.08
   3   5  -2 1807.02  116.99
  -2  -5   2   97.29   14.10
  -2  -5   2  143.29   18.10
   2  -5  -2  115.89   19.50
   2   5  -2  136.09   26.70
   2   5  -2  101.69   38.00
   1  -5  -2  225.48   27.30
  -1  -5   2  190.48   14.60
  -1  -5   2  199.18   20.30
  -1  -5   2  219.88   25.50
  -1   5   2  219.78   36.80
   1   5  -2  247.18   44.70
   1   5  -2  220.38   31.50
   0  -5   2  728.73   43.10
   0  -5  -2  695.63   52.19
   0  -5   2  784.42   55.89
   0   5  -2  732.03   73.39
   0   5  -2  587.44   67.59
   0   5  -2  735.13   58.19
   0   5   2  743.33   77.89
   0   5   2  721.53   85.69
  -1  -5  -2 4876.71  195.28
  -1  -5  -2 4310.97  163.68
   1  -5   2 4437.26  177.58
   1  -5   2 4969.90  208.88
   1   5   2 4743.73  244.38
  -1   5  -2 4529.65  201.38
  -1   5  -2 4616.04  215.88
   1   5   2 4100.19  271.07
  -2  -5  -2 1012.50   43.40
  -2  -5  -2  974.20   62.89
   2  -5   2  940.31   54.39
   2   5   2  960.50   98.49
   2   5   2  792.32  113.69
   3  -5   2 1439.66   74.79
  -3  -5  -2 1409.66   81.69
  -3  -5  -2 1439.36   58.49
   3   5   2 1249.18  121.39
   3   5   2 1036.60  147.09
   4  -5   2  148.49   29.20
   4   5   2  132.39   48.70
   4   5   2   96.19   61.29
   5  -5   2  849.81   59.99
  -5  -5  -2  807.52   33.90
   5  -5   2  700.83   79.79
  -5  -5  -2  848.32   33.70
  -5  -5  -2  825.32   33.20
  -5  -5  -2  803.12   33.20
  -5  -5  -2  818.22   34.10
  -5  -5  -2  827.22   41.10
  -5   5  -2  801.02   37.00
  -5   5  -2  809.72   39.50
  -5   5  -2  845.92   37.80
  -5   5  -2  818.52   38.30
   5   5   2  722.33  105.69
  -5   5  -2  849.12   37.90
  -5   5  -2  816.22   40.10
  -5   5  -2  790.42   37.30
   5   5   2  663.23  133.29
  -5   5  -2  851.11   43.40
  -5   5  -2  817.72   38.00
  -5   5  -2  813.62   35.00
  -6  -5  -2  138.59    9.90
   6  -5   2  136.09   41.40
  -6  -5  -2  138.29    9.60
  -6  -5  -2  140.99   10.10
   6  -5   2  146.29   34.00
  -6  -5  -2  149.59   12.10
  -6  -5  -2  136.09    9.10
  -6  -5  -2  123.99   12.90
  -6  -5  -2  127.49    9.50
  -6  -5  -2  131.19    9.30
  -6   5  -2  127.49   12.10
  -6   5  -2  133.19   12.20
  -6   5  -2  131.39   11.90
  -6   5  -2  122.89   10.30
   6   5   2   84.69   71.89
   6   5   2   99.99   21.00
  -6   5  -2  134.19   12.50
  -6   5  -2  125.79   11.00
  -6   5  -2  132.49   14.90
  -6   5  -2  130.59    9.70
  -6   5  -2  137.09   13.60
  -6   5  -2  135.29   12.50
  -6   5  -2  127.29    9.40
  -6   5  -2  136.79   14.00
  -6   5  -2  124.29   11.80
  -6   5  -2  137.69   13.50
  -6   5  -2  136.89   15.00
  -7  -5  -2  663.13   31.00
  -7  -5  -2  638.04   29.00
  -7  -5  -2  655.23   40.40
  -7  -5  -2  762.62   35.30
   7  -5   2  559.44   80.39
  -7  -5  -2  659.23   31.70
  -7  -5  -2  660.13   30.10
  -7  -5  -2  637.04   29.10
  -7  -5  -2  697.23   29.30
  -7  -5  -2  668.13   30.40
  -7   5  -2  659.93   34.10
  -7   5  -2  666.13   35.80
  -7   5  -2  692.33   34.50
  -7   5  -2  674.43   35.00
  -7   5  -2  690.43   34.20
  -7   5  -2  651.13   31.70
  -7   5  -2  682.43   31.50
   7   5   2  413.66  134.89
  -7   5  -2  699.23   35.30
  -7   5  -2  680.43   33.90
  -7   5  -2  714.33   35.30
  -7   5  -2  626.94   29.50
  -7   5  -2  633.94   39.90
  -7   5  -2  652.43   38.00
  -7   5  -2  655.73   29.20
  -7   5  -2  627.84   35.70
  -8  -5  -2    1.70    1.80
  -8  -5  -2    4.80    2.30
  -8  -5  -2    0.80    1.70
  -8  -5  -2    1.50    2.50
  -8  -5  -2    3.20    2.10
  -8  -5  -2    4.50    2.50
  -8  -5  -2    5.30    2.30
  -8  -5  -2    3.10    2.30
  -8  -5  -2    5.80    2.50
  -8   5  -2    1.80    2.70
  -8   5  -2    1.10    3.80
  -8   5  -2    8.40    6.40
  -8   5  -2    2.40    2.50
  -8   5  -2    3.80    2.10
  -8   5  -2   11.50    4.50
  -8   5  -2    0.30    2.10
  -8   5  -2    2.90    3.60
  -8   5  -2    2.70    3.00
  -8   5  -2    2.20    2.80
  -8   5  -2    3.10    2.30
  -9  -5  -2  198.48   18.90
  -9  -5  -2  217.18   13.40
  -9  -5  -2  217.88   14.50
  -9  -5  -2  224.78   13.20
  -9  -5  -2  245.28   13.40
  -9  -5  -2  231.38   15.30
  -9  -5  -2  233.88   13.50
  -9  -5  -2  227.58   14.00
  -9  -5  -2  249.18   17.50
  -9   5  -2  216.78   16.40
  -9   5  -2  233.48   18.10
  -9   5  -2  243.68   13.20
  -9   5  -2  238.58   16.30
  -9   5  -2  261.57   21.80
  -9   5  -2  255.57   18.10
  -9   5  -2  230.28   17.70
  -9   5  -2  220.08   14.90
  -9   5  -2  210.08   16.10
  -9   5  -2  223.38   16.40
 -10  -5  -2  107.29    8.50
 -10  -5  -2   85.89    6.70
 -10  -5  -2  112.99    8.60
 -10  -5  -2   99.29    6.80
 -10  -5  -2   97.79    9.50
 -10  -5  -2   90.09    7.20
 -10   5  -2  109.39   11.00
 -10   5  -2   98.49    9.10
 -10   5  -2  114.39   10.30
 -10   5  -2  109.29   10.60
 -10   5  -2  114.39   10.30
 -10   5  -2   92.79   10.70
 -11  -5  -2    6.90    1.60
 -11  -5  -2    8.50    1.90
 -11  -5  -2   13.50    3.10
 -11   5  -2   10.70    4.50
 -11   5  -2   13.70    5.40
 -11  -6   2   19.10    2.90
 -11  -6   2   22.60    2.40
 -11  -6   2   22.10    2.90
 -11  -6   2   23.90    2.70
 -11  -6   2   18.90    5.30
 -11   6   2   21.20    4.50
 -10  -6   2  184.28   10.80
 -10  -6   2  166.88   10.10
 -10  -6   2  152.48   12.00
 -10  -6   2  165.58   11.10
 -10  -6   2  152.28   10.00
 -10  -6   2  165.38   10.50
 -10   6   2  179.48   16.50
 -10   6   2  175.08   18.20
 -10   6   2  143.79    9.30
 -10   6   2  161.98   10.90
 -10   6   2  169.18   10.90
 -10   6   2  181.78   22.10
 -10   6   2  145.69   13.40
 -10   6   2  165.08   12.30
  -9  -6   2   71.19    6.20
  -9  -6   2   72.79    7.00
  -9  -6   2   70.59    6.70
  -9  -6   2   62.29    6.30
  -9  -6   2   62.29    6.20
  -9  -6   2   66.59    6.80
  -9  -6   2   78.69    7.10
  -9  -6   2   66.29    8.00
  -9   6   2   67.99    9.90
  -9   6   2  102.29   16.50
  -9   6   2  100.29   15.60
  -9   6   2   68.89    5.70
  -9   6   2   67.29    6.80
  -9   6   2   96.99   14.80
  -9   6   2  110.69   18.00
  -9   6   2   70.59    5.90
  -9   6   2   67.99    6.90
  -9   6   2   82.99    8.00
  -9   6   2   74.79    7.00
   9   6  -2   52.39   13.60
  -9   6   2   79.69   14.90
  -8  -6   2  105.09   10.40
  -8  -6   2  102.59    9.00
  -8  -6   2  106.69    8.60
  -8  -6   2  112.09    8.90
  -8  -6   2  113.49    9.00
  -8  -6   2  122.09    9.10
  -8  -6   2  100.49    8.00
  -8  -6   2  113.49    9.30
  -8   6   2  112.59   12.80
  -8   6   2  120.59   10.10
  -8   6   2  108.39    7.50
  -8   6   2  100.29    9.20
  -8   6   2  104.99    9.20
  -8   6   2  106.39    8.00
  -8   6   2   94.89   14.80
   8   6  -2  100.89   19.10
  -8   6   2  106.69   11.50
  -8   6   2  115.69   14.90
  -8   6   2  128.89   16.40
  -8   6   2  109.09   10.00
  -8   6   2  115.89   15.80
  -8   6   2  151.18   15.30
  -8   6   2  160.58   19.30
  -7  -6   2 1079.99   45.50
  -7  -6   2 1187.08   49.00
  -7  -6   2 1021.30   45.80
  -7  -6   2 1138.29   44.80
  -7  -6   2 1127.89   43.90
  -7  -6   2 1032.60   44.60
  -7  -6   2 1118.99   45.00
  -7  -6   2 1172.58   44.50
  -7  -6   2 1203.98   45.40
  -7   6   2 1209.48   60.09
  -7   6   2 1195.98   52.99
  -7   6   2 1211.78   53.69
  -7   6   2 1132.09   46.20
  -7   6   2 1193.78   53.19
  -7   6   2 1065.19   42.70
  -7   6   2  982.30   45.40
  -7   6   2 1054.69   48.20
  -7   6   2 1188.88   48.10
  -7   6   2 1075.99   52.39
  -7   6   2 1128.69   46.10
   7   6  -2 1058.69  103.89
  -7   6   2 1077.19   49.10
  -7   6   2 1106.29   47.80
  -7   6   2 1108.19   52.39
  -7   6   2 1172.08   54.19
  -6  -6   2  116.89   11.40
  -6  -6   2  129.49   10.90
  -6  -6   2  128.59    9.60
  -6  -6   2  149.69    9.70
   6  -6  -2  101.39   27.40
  -6  -6   2  128.69    8.60
  -6  -6   2  135.59    8.50
  -6  -6   2  126.09    8.90
  -6   6   2  129.39   15.60
  -6   6   2  134.19   11.20
   6   6  -2  123.79   21.90
  -6   6   2  123.19    7.90
  -6   6   2  136.19   14.60
  -6   6   2  129.09    9.90
  -6   6   2  105.79   15.40
  -6   6   2  137.49   11.80
  -6   6   2  120.29    9.80
  -6   6   2  139.99   13.70
  -6   6   2  141.19   13.60
  -6   6   2   99.39   12.70
  -6   6   2  121.09    8.80
  -6   6   2  134.79   12.80
   6   6  -2  213.28   92.59
  -6   6   2  143.49   16.60
  -6   6   2  135.59   10.90
  -6   6   2  145.29   16.20
  -5  -6   2  148.19   11.20
  -5  -6   2  147.89   13.40
  -5  -6   2  138.89   10.40
   5  -6  -2  152.68   33.90
  -5   6   2  158.88   16.10
  -5   6   2  127.69   10.10
  -5   6   2  136.29    9.80
  -5   6   2  160.58   13.40
   5   6  -2  182.78   47.80
  -5   6   2  131.19   13.00
  -5   6   2  147.09   11.30
   5   6  -2  128.29   76.59
  -5   6   2  155.98   13.00
  -5   6   2  162.18   13.80
   5   6  -2   54.79   43.80
  -5   6   2  130.99   14.70
  -5   6   2  139.99   14.90
   5   6  -2  182.98   23.80
   4  -6  -2   80.89   25.80
  -4  -6   2   63.69    8.90
  -4  -6   2   73.19    6.90
   4   6  -2   83.89   48.40
   4   6  -2  100.09   50.09
   4   6  -2   96.79   36.30
  -3  -6   2  550.04   25.00
   3  -6  -2  572.54   53.79
  -3  -6   2  535.15   30.10
  -3  -6   2  580.14   40.90
   3   6  -2  454.95   94.89
   3   6  -2  521.75   87.99
   3   6  -2  568.24   63.39
  -2  -6   2 2901.71  108.49
   2  -6  -2 3038.60  146.59
  -2  -6   2 2934.71  129.89
  -2  -6   2 2887.51  123.69
   2   6  -2 2710.23  203.88
   2   6  -2 2745.23  158.18
   2   6  -2 2303.47  216.48
  -1  -6   2   58.99   14.40
   1  -6  -2   39.40   14.70
  -1  -6   2   35.90   14.10
  -1  -6   2   52.39    7.60
   1   6  -2   65.69   22.70
   1   6  -2   97.69   42.00
  -1   6   2   66.99   28.70
   1   6  -2   63.39   30.30
   0  -6   2 1197.78   52.89
   0  -6   2 1261.27   80.99
   0  -6   2 1270.97   65.29
   0  -6  -2 1163.08   52.09
   0  -6  -2 1194.98   78.79
   0   6  -2 1136.79   83.99
   0   6  -2 1237.68  107.49
   0   6   2 1256.47  112.79
   0   6  -2 1009.50   95.79
   0   6   2 1292.07  119.99
  -1  -6  -2  891.71   36.30
   1  -6   2  883.51   69.19
  -1  -6  -2  903.01   41.80
   1  -6   2  946.81   53.69
  -1  -6  -2  823.52   62.39
  -1   6  -2  854.51   70.19
   1   6   2  776.32  107.19
   1   6   2  812.12   90.69
  -1   6  -2  854.21  100.19
  -2  -6  -2  499.25   46.50
   2  -6   2  566.24   66.59
  -2  -6  -2  573.14   26.30
  -2  -6  -2  541.85   30.10
   2  -6   2  542.45   40.00
   2   6   2  576.64   79.89
   2   6   2  507.15   94.39
  -3  -6  -2  222.18   29.70
   3  -6   2  255.77   41.40
   3  -6   2  271.77   27.90
   3   6   2  312.77   96.59
   3   6   2  231.48   88.39
  -4  -6  -2   23.50    6.70
   4  -6   2   23.70   15.00
  -4  -6  -2   15.10    9.00
   4  -6   2   27.70    9.80
  -4   6  -2   13.80    5.80
  -4   6  -2   21.80    5.00
  -4   6  -2   20.10    5.80
  -4   6  -2   15.40    4.40
   4   6   2    9.50   30.50
   4   6   2   27.60   42.10
  -5  -6  -2  559.94   25.10
   5  -6   2  618.24   84.39
  -5  -6  -2  552.04   24.80
  -5  -6  -2  576.34   33.10
   5  -6   2  624.24   50.09
  -5  -6  -2  563.44   28.10
  -5  -6  -2  604.04   25.60
  -5  -6  -2  557.04   24.10
  -5   6  -2  558.94   27.00
  -5   6  -2  584.94   29.80
  -5   6  -2  577.34   32.30
  -5   6  -2  571.64   29.50
  -5   6  -2  605.94   29.70
  -5   6  -2  555.94   25.40
  -5   6  -2  594.74   35.30
   5   6   2  375.36  131.99
   5   6   2  483.75   40.00
  -5   6  -2  599.94   29.80
  -5   6  -2  569.94   30.20
  -5   6  -2  557.74   30.30
  -5   6  -2  579.74   32.60
  -6  -6  -2  132.09    9.50
   6  -6   2  198.88   29.30
   6  -6   2  126.49   35.50
  -6  -6  -2  135.29    9.90
  -6  -6  -2  137.59    9.20
  -6  -6  -2  127.59    9.60
  -6  -6  -2  132.69   13.70
  -6  -6  -2  132.39   11.80
  -6  -6  -2  131.79    9.50
  -6   6  -2  130.69   14.40
  -6   6  -2  128.99   12.40
  -6   6  -2  132.29   13.10
  -6   6  -2  149.69   16.40
  -6   6  -2  120.59    9.30
  -6   6  -2  136.79   12.60
  -6   6  -2  141.19   15.70
  -6   6  -2  125.59   11.00
  -6   6  -2  131.59   12.50
  -6   6  -2  116.69   10.10
  -6   6  -2  125.59   14.50
   6   6   2  110.59   75.39
   6   6   2  159.48   24.10
  -6   6  -2  130.39   12.30
  -7  -6  -2  388.36   19.40
  -7  -6  -2  349.17   19.50
  -7  -6  -2  363.76   20.30
  -7  -6  -2  406.16   19.00
  -7  -6  -2  386.96   19.20
  -7  -6  -2  354.76   21.00
  -7  -6  -2  381.46   23.00
  -7  -6  -2  402.06   20.40
  -7   6  -2  373.46   28.80
  -7   6  -2  390.86   23.40
  -7   6  -2  386.46   23.70
  -7   6  -2  354.66   25.00
  -7   6  -2  392.86   25.30
  -7   6  -2  385.16   24.40
  -7   6  -2  402.06   26.90
  -7   6  -2  394.86   23.90
   7   6   2  304.87   31.40
  -7   6  -2  360.36   18.70
  -7   6  -2  393.06   24.00
  -7   6  -2  371.76   19.10
  -7   6  -2  394.96   21.70
  -8  -6  -2  211.78   12.60
  -8  -6  -2  192.48   14.20
  -8  -6  -2  220.58   16.10
  -8  -6  -2  198.08   12.00
  -8  -6  -2  192.58   13.90
  -8  -6  -2  198.58   12.70
  -8  -6  -2  195.38   12.20
  -8  -6  -2  213.08   14.10
  -8   6  -2  205.28   12.10
  -8   6  -2  184.28   17.40
  -8   6  -2  187.08   14.90
  -8   6  -2  205.78   18.10
  -8   6  -2  192.08   15.70
  -8   6  -2  187.18   14.60
  -8   6  -2  196.88   16.20
  -8   6  -2  222.38   20.30
  -8   6  -2  210.98   17.90
   8   6   2  221.08   22.30
  -8   6  -2  183.58   12.80
  -8   6  -2  183.98   17.20
  -9  -6  -2   30.60    4.10
  -9  -6  -2   32.60    4.60
  -9  -6  -2   37.30    5.70
  -9  -6  -2   35.50    4.10
  -9  -6  -2   35.40    5.20
  -9  -6  -2   36.70    4.50
  -9  -6  -2   30.10    5.60
  -9   6  -2   25.30    6.00
  -9   6  -2   36.30    7.20
   9   6   2   14.00    6.60
  -9   6  -2   25.30    6.50
  -9   6  -2   31.80    8.40
  -9   6  -2   38.30   10.30
  -9   6  -2   22.50    5.20
  -9   6  -2   31.20    6.70
  -9   6  -2   34.50    5.50
 -10  -6  -2    9.50    3.40
 -10  -6  -2   13.80    3.00
 -10  -6  -2   10.50    2.40
 -10  -6  -2   11.40    2.50
 -10  -6  -2   14.60    2.70
 -10  -6  -2   12.10    2.20
 -10   6  -2   10.70    5.00
 -10   6  -2    8.40    7.80
 -10   6  -2   17.60    5.40
 -10   6  -2   18.80    6.40
 -10   6  -2   12.70    4.20
 -11  -6  -2   16.70    2.10
 -11  -6  -2   17.20    2.30
 -11  -7   2   64.29    4.20
 -11  -7   2   59.59    5.10
 -11  -7   2   54.39    4.10
 -10  -7   2  122.39    8.20
 -10  -7   2   95.79    8.60
 -10  -7   2  136.19    8.00
 -10  -7   2  120.19    7.10
 -10  -7   2  106.99    7.30
 -10  -7   2  131.89    8.10
 -10   7   2   96.69    8.60
 -10   7   2  133.59    8.60
 -10   7   2  144.79   19.00
 -10   7   2  124.29    8.40
 -10   7   2  121.59   11.10
  -9  -7   2   11.70    3.00
  -9  -7   2   15.30    3.20
  -9  -7   2   19.60    4.80
  -9  -7   2   25.50    6.70
  -9  -7   2   20.00    4.10
  -9  -7   2   20.90    3.60
  -9  -7   2   17.30    3.40
  -9   7   2   18.80    3.80
  -9   7   2   16.70    3.40
  -9   7   2   35.70   10.20
   9   7  -2   31.70   10.30
  -9   7   2   17.10    3.80
  -9   7   2   22.50    3.90
  -9   7   2   22.80    9.80
  -9   7   2   28.40   11.00
  -9   7   2   15.20    5.40
  -8  -7   2  297.27   16.10
  -8  -7   2  288.27   16.00
  -8  -7   2  337.07   21.00
  -8  -7   2  257.77   15.50
  -8  -7   2  301.17   15.30
  -8  -7   2  262.87   17.70
  -8  -7   2  276.57   16.10
  -8   7   2  303.57   17.70
  -8   7   2  318.47   33.50
  -8   7   2  288.67   20.20
  -8   7   2  305.37   25.00
   8   7  -2  280.47   30.30
  -8   7   2  307.27   30.80
  -8   7   2  271.07   19.30
  -8   7   2  281.57   13.80
  -8   7   2  301.87   17.20
  -8   7   2  307.17   31.60
  -8   7   2  294.07   14.40
  -7  -7   2  101.09    8.30
  -7  -7   2  106.69   10.30
  -7  -7   2  108.09    8.60
  -7  -7   2  110.09    9.00
  -7  -7   2   99.09    8.60
  -7  -7   2   99.99    9.90
  -7  -7   2  102.99    7.70
  -7  -7   2  108.49    8.20
  -7  -7   2  109.19    8.60
  -7   7   2  105.49    9.10
  -7   7   2   98.49    9.30
  -7   7   2  109.79   14.60
  -7   7   2  108.59    9.30
  -7   7   2  103.79    7.90
  -7   7   2   97.49    9.70
  -7   7   2  123.19   14.10
   7   7  -2  114.29   23.20
  -7   7   2  108.49   14.90
  -7   7   2  140.99   19.10
  -7   7   2  111.69   12.50
  -7   7   2  133.89   17.80
  -7   7   2   93.79    7.10
  -6  -7   2  265.77   15.10
   6  -7  -2  197.78   41.60
  -6  -7   2  261.07   13.80
  -6  -7   2  261.17   19.20
  -6  -7   2  260.97   14.60
  -6  -7   2  282.57   17.20
  -6  -7   2  261.37   14.60
  -6  -7   2  248.18   13.80
  -6   7   2  264.07   22.20
  -6   7   2  285.47   23.90
  -6   7   2  264.87   15.90
   6   7  -2  251.77   49.60
  -6   7   2  267.67   17.30
  -6   7   2  260.17   16.20
  -6   7   2  279.67   23.40
  -6   7   2  230.28   13.70
   6   7  -2  217.08  131.09
  -6   7   2  280.27   20.20
  -6   7   2  269.57   20.20
  -6   7   2  284.47   16.00
   6   7  -2  234.08   29.00
  -6   7   2  303.67   22.00
  -5  -7   2    8.80    2.40
   5  -7  -2    9.40    3.60
  -5  -7   2    6.80    2.70
  -5  -7   2    4.90    2.40
   5  -7  -2   35.60   16.60
  -5  -7   2    4.90    3.20
  -5   7   2    3.70    3.40
  -5   7   2   10.60    3.70
  -5   7   2    8.70    4.20
  -5   7   2    7.90    2.80
  -5   7   2    9.90    8.30
  -5   7   2   -0.70    8.80
  -5   7   2    6.60    5.50
  -5   7   2    8.50    4.50
   5   7  -2   94.49   51.09
  -5   7   2    1.60    2.40
  -5   7   2    5.50    2.40
  -5   7   2    2.30    2.20
   5   7  -2   83.29   65.79
   5   7  -2   -6.30    6.50
   5   7  -2   14.70   24.50
  -4  -7   2  504.45   29.80
  -4  -7   2  491.15   23.90
   4  -7  -2  447.86   53.59
   4  -7  -2  500.25   24.70
  -4   7   2  479.15   23.80
   4   7  -2  455.65   61.39
   4   7  -2  668.33  105.49
  -4   7   2  492.75   27.20
  -4   7   2  508.45   30.90
   4   7  -2  425.16  107.69
  -4   7   2  436.66   27.90
  -4   7   2  530.35   28.80
  -4   7   2  506.55   25.30
   4   7  -2  496.05   37.40
  -4   7   2  473.25   28.80
  -4   7   2  497.75   23.10
   3  -7  -2  102.89    9.10
  -3  -7   2  122.19    9.40
  -3  -7   2  104.69   22.30
   3  -7  -2   65.49   22.50
  -3  -7   2  115.59   12.90
   3   7  -2   78.39   47.40
   3   7  -2  115.99   55.19
   3   7  -2  134.59   39.00
   2  -7  -2  502.95   24.20
  -2  -7   2  459.05   29.00
   2  -7  -2  506.45   52.09
  -2  -7   2  505.55   24.40
  -2  -7   2  544.85   45.70
   2  -7  -2  480.25   28.90
   2   7  -2  518.05   59.69
   2   7  -2  471.65   98.29
   2   7  -2  433.56   84.89
  -1  -7   2  618.94   43.50
   1  -7  -2  603.44   32.50
  -1  -7   2  619.24   28.40
  -1  -7   2  596.24   52.29
  -1  -7   2  546.25   32.30
   1  -7  -2  570.24   55.79
   1  -7  -2  599.64   27.50
   1   7  -2  564.54   61.79
  -1   7   2  663.03   72.29
   1   7  -2  475.35   83.49
   1   7  -2  582.14   84.59
   0  -7  -2   62.89    6.30
   0  -7  -2   50.59   16.60
   0  -7   2   59.59    9.10
   0  -7  -2   49.10    8.40
   0  -7   2   52.69   17.80
   0   7   2   69.59   29.60
   0   7   2   85.19   41.80
   0   7  -2   70.89   27.60
   0   7  -2   -3.60   25.40
   0   7  -2   96.69   34.10
   1  -7   2   30.10    8.80
  -1  -7  -2   12.60    9.30
  -1  -7  -2   35.80    8.80
  -1  -7  -2   20.40    4.80
   1  -7   2   19.50   10.40
  -1   7  -2    4.50   11.70
   1   7   2    0.10   19.40
  -1   7  -2    8.00   16.70
   1   7   2   45.00   32.50
  -2  -7  -2   64.59    7.10
  -2  -7  -2   67.39    9.20
   2  -7   2   45.30   19.10
   2  -7   2   87.09   15.60
  -2  -7  -2   68.79   21.80
   2   7   2  148.69   47.30
   2   7   2   76.79   34.90
  -3  -7  -2  223.88   31.00
  -3  -7  -2  196.08   17.70
   3  -7   2  215.58   25.30
   3  -7   2  271.17   41.40
  -3   7  -2  220.78   18.10
   3   7   2  249.08   96.49
   3   7   2  206.48   26.90
   3   7   2  182.08   51.89
  -3   7  -2  218.98   18.10
  -4  -7  -2  958.80   70.99
   4  -7   2  934.21   89.99
   4  -7   2  885.61   60.39
  -4  -7  -2  972.80   48.60
  -4  -7  -2  959.90   37.70
   4   7   2  887.51  119.19
   4   7   2  882.81   57.29
  -4   7  -2  994.10   47.40
  -4   7  -2  985.50   43.10
  -4   7  -2  849.81   42.10
   4   7   2  853.41  156.98
  -4   7  -2  958.20   44.10
  -4   7  -2  952.90   42.90
  -4   7  -2 1036.60   49.60
  -4   7  -2  910.81   40.50
  -4   7  -2  980.20   42.30
  -5  -7  -2   72.89    6.40
   5  -7   2  107.69   26.20
  -5  -7  -2   64.69    5.50
  -5  -7  -2   61.69    5.90
  -5  -7  -2   68.89    7.70
  -5  -7  -2   65.69    6.30
  -5  -7  -2   59.39    6.10
   5  -7   2   76.19   28.90
  -5   7  -2   62.19    8.30
  -5   7  -2   71.19    8.40
  -5   7  -2   64.19   12.20
  -5   7  -2   67.89    8.50
  -5   7  -2   66.19    8.30
  -5   7  -2   63.09   10.40
  -5   7  -2   61.49    6.20
   5   7   2   64.69   17.30
   5   7   2   11.90   43.50
  -5   7  -2   72.39   10.70
  -5   7  -2   69.09    9.40
  -6  -7  -2   62.99    6.20
  -6  -7  -2   68.09    6.70
  -6  -7  -2   66.69    6.00
  -6  -7  -2   46.00   10.10
  -6  -7  -2   68.19    6.70
  -6  -7  -2   64.79    8.00
  -6  -7  -2   67.19    6.50
   6  -7   2   88.99   34.70
  -6   7  -2   55.49   10.60
  -6   7  -2   60.69    8.40
  -6   7  -2   59.69    8.50
  -6   7  -2   54.79    7.90
  -6   7  -2   70.89    9.70
  -6   7  -2   82.69   13.10
  -6   7  -2   68.39    8.80
  -6   7  -2   67.19   10.90
   6   7   2   61.29   16.50
  -6   7  -2   61.59    6.40
   6   7   2   24.20   62.39
  -7  -7  -2  318.77   16.60
  -7  -7  -2  343.17   20.60
  -7  -7  -2  344.37   16.50
  -7  -7  -2  319.97   17.60
  -7  -7  -2  306.07   16.50
  -7  -7  -2  317.67   17.40
  -7  -7  -2  297.37   17.30
  -7  -7  -2  304.97   18.70
  -7   7  -2  307.17   20.60
  -7   7  -2  318.07   16.80
  -7   7  -2  318.67   20.60
   7   7   2  279.07   30.10
  -7   7  -2  318.97   24.50
  -7   7  -2  276.17   24.50
  -7   7  -2  331.67   21.50
  -7   7  -2  331.87   21.70
  -7   7  -2  308.77   20.50
  -7   7  -2  344.57   22.80
  -8  -7  -2  577.04   27.40
  -8  -7  -2  577.64   24.00
  -8  -7  -2  537.05   24.20
  -8  -7  -2  530.25   25.00
  -8  -7  -2  566.04   24.20
  -8  -7  -2  545.75   28.50
  -8  -7  -2  570.94   25.90
  -8   7  -2  461.45   28.10
  -8   7  -2  557.24   30.30
  -8   7  -2  539.85   27.40
  -8   7  -2  579.64   33.20
  -8   7  -2  461.85   32.30
   8   7   2  580.74   37.20
  -8   7  -2  525.35   29.20
  -8   7  -2  479.25   26.80
  -8   7  -2  565.54   24.00
  -8   7  -2  560.14   29.30
  -9  -7  -2    1.90    2.20
  -9  -7  -2    0.80    1.60
  -9  -7  -2   -1.20    1.00
  -9  -7  -2    0.10    1.00
  -9  -7  -2    0.60    1.10
  -9  -7  -2   -1.30    1.30
  -9   7  -2    0.60    2.60
  -9   7  -2    0.00    2.50
   9   7   2   -7.50    4.30
  -9   7  -2    3.20    2.90
  -9   7  -2   25.20    9.40
  -9   7  -2    1.60    2.70
  -9   7  -2    8.30    5.70
 -10  -7  -2  221.68   11.40
 -10  -7  -2  237.98   12.00
 -10  -7  -2  184.48   10.40
 -10  -7  -2  193.58   11.80
 -10   7  -2  230.68   14.80
 -10   7  -2  203.98   12.80
 -10   7  -2  208.98   13.80
 -10  -8   2   54.79    6.20
 -10  -8   2   38.00    3.30
 -10  -8   2   44.80    3.90
 -10  -8   2   43.20    4.20
 -10  -8   2   37.70    3.50
 -10   8   2   69.49   14.20
 -10   8   2   47.90    6.40
 -10   8   2   43.00    4.90
 -10   8   2   41.60    4.80
  -9  -8   2   54.79    5.00
  -9  -8   2   42.50    6.30
  -9  -8   2   55.89    4.60
  -9  -8   2   52.29    4.90
  -9  -8   2   49.70    5.10
  -9   8   2   39.00    8.40
  -9   8   2   69.09   14.50
  -9   8   2   43.60    4.80
  -9   8   2   52.49   11.60
  -9   8   2   47.90    5.10
  -9   8   2   58.39   11.60
  -9   8   2   36.10    5.10
   9   8  -2   36.40   10.70
  -9   8   2   46.50    5.00
  -8  -8   2   25.60    3.80
  -8  -8   2   24.10    3.80
  -8  -8   2   27.80    4.10
  -8  -8   2   24.00    4.40
  -8  -8   2   26.80    3.70
  -8  -8   2   26.30    3.60
  -8  -8   2   22.90    3.60
  -8   8   2   33.60   11.90
  -8   8   2   26.90    4.90
  -8   8   2   22.60    4.50
  -8   8   2   50.99   11.50
  -8   8   2   30.80    9.50
   8   8  -2   20.40    9.20
  -8   8   2   22.80    3.90
  -8   8   2   19.90    5.50
  -8   8   2   24.20    4.00
  -7  -8   2  268.17   15.10
  -7  -8   2  272.17   15.10
  -7  -8   2  292.47   15.70
  -7  -8   2  247.48   13.40
  -7  -8   2  289.57   17.70
  -7  -8   2  261.87   15.40
  -7  -8   2  272.17   14.90
  -7  -8   2  248.08   20.60
  -7  -8   2  262.57   14.40
   7   8  -2  231.48   27.80
  -7   8   2  247.28   19.70
  -7   8   2  268.57   15.80
  -7   8   2  238.08   22.50
  -7   8   2  310.17   26.10
  -7   8   2  259.67   16.80
  -7   8   2  233.18   21.00
  -7   8   2  274.07   16.00
  -7   8   2  269.67   15.70
  -7   8   2  324.97   24.40
   6  -8  -2  365.86   50.19
  -6  -8   2  255.27   14.40
  -6  -8   2  261.87   14.40
  -6  -8   2  268.87   16.80
  -6  -8   2  246.18   14.20
  -6  -8   2  230.78   13.00
  -6  -8   2  251.77   13.60
  -6  -8   2  246.58   19.10
   6   8  -2  358.76   76.09
   6   8  -2  222.68   28.80
   6   8  -2  152.88   85.19
  -6   8   2  256.17   20.10
  -6   8   2  279.37   22.50
  -6   8   2  247.18   19.60
  -6   8   2  247.88   16.80
  -6   8   2  247.28   15.30
  -6   8   2  253.07   22.80
  -6   8   2  247.48   15.20
  -6   8   2  234.98   13.40
  -6   8   2  254.87   23.90
  -6   8   2  258.87   15.70
   5  -8  -2   62.69   27.90
  -5  -8   2   38.20    5.00
   5  -8  -2   39.60    7.40
  -5  -8   2   27.60    7.50
  -5  -8   2   43.30    5.90
  -5  -8   2   39.40    5.00
   5   8  -2   12.50   23.60
  -5   8   2   42.00   11.20
   5   8  -2   23.70   57.29
  -5   8   2   47.80   10.20
   5   8  -2   48.90   14.50
  -5   8   2   39.10    8.40
  -5   8   2   45.30    8.60
  -5   8   2   41.20    5.40
  -5   8   2   45.80    6.30
  -5   8   2   51.69   14.10
  -5   8   2   37.70    5.80
  -5   8   2   41.70    6.10
  -5   8   2   44.80    7.90
   4  -8  -2  377.66   20.30
  -4  -8   2  326.67   18.80
  -4  -8   2  373.86   19.60
  -4  -8   2  350.16   19.50
   4  -8  -2  347.27   49.30
  -4  -8   2  361.66   25.50
   4  -8  -2  344.17   19.70
  -4   8   2  341.67   21.80
  -4   8   2  370.56   25.80
  -4   8   2  378.86   19.80
   4   8  -2  196.78  133.19
  -4   8   2  344.27   19.10
   4   8  -2  323.57   27.90
   4   8  -2  319.17   88.69
  -4   8   2  351.66   18.40
  -4   8   2  330.37   17.70
  -4   8   2  367.46   24.30
  -4   8   2  308.57   23.00
   4   8  -2  268.27   52.99
  -4   8   2  371.36   20.90
  -4   8   2  392.46   23.40
  -4   8   2  333.57   25.70
   4   8  -2  354.66   32.30
   3  -8  -2  571.74   27.80
  -3  -8   2  543.25   26.90
  -3  -8   2  555.14   27.00
  -3  -8   2  533.85   33.20
  -3  -8   2  566.04   50.59
   3  -8  -2  519.55   59.99
  -3   8   2  535.15   32.90
  -3   8   2  555.24   25.60
   3   8  -2  579.54   42.20
   3   8  -2  599.64  174.08
   3   8  -2  570.34   68.79
  -3   8   2  566.44   34.80
  -3   8   2  583.34   33.00
   3   8  -2  701.83  109.79
   3   8  -2  547.05   41.50
   2  -8  -2  477.55   24.70
   2  -8  -2  455.65   29.80
  -2  -8   2  472.35   48.40
  -2  -8   2  467.05   23.90
  -2  -8   2  518.05   31.60
   2  -8  -2  517.65   56.49
  -2  -8   2  511.75   25.00
   2   8  -2  589.54   89.69
   2   8  -2  470.15   37.10
   2   8  -2  450.35   60.29
  -2   8   2  471.75   30.70
   2   8  -2  486.05  131.99
  -2   8   2  466.95   22.50
  -1  -8   2  644.44   31.40
   1  -8  -2  679.13   31.20
   1  -8  -2  690.53   37.70
   1  -8  -2  653.03   63.79
  -1  -8   2  654.43   37.60
  -1  -8   2  649.83   58.99
  -1  -8   2  680.43   49.20
   1   8  -2  559.64   93.49
   1   8  -2  726.03   91.49
   1   8  -2  625.64   72.59
  -1   8   2  748.63   80.19
   0  -8  -2  589.44   34.30
   0  -8  -2  604.94   28.30
   0  -8   2  606.44   59.29
   0  -8  -2  530.65   58.39
   0  -8   2  638.34   45.90
   0   8  -2  545.55   65.69
   0   8   2  585.04   88.59
   0   8   2  504.85   85.29
   0   8  -2  623.44   85.69
  -1  -8  -2   44.30    7.30
  -1  -8  -2   33.60    6.60
   1  -8   2   30.10   22.30
   1  -8   2   39.50   10.10
  -1  -8  -2   20.90   12.30
   1  -8   2   33.90   11.80
  -1  -8  -2   44.40    7.30
  -1   8  -2   30.90    8.50
   1   8   2   31.90   34.00
  -1   8  -2   78.09   33.10
   1   8   2   63.39   38.50
  -2  -8  -2  197.68   18.20
   2  -8   2  170.78   41.70
   2  -8   2  217.98   14.50
  -2  -8  -2  189.58   30.90
   2  -8   2  169.78   18.00
   2  -8   2  180.88   24.00
  -2  -8  -2  192.78   13.90
  -2   8  -2  212.08   17.50
   2   8   2  200.68   23.60
   2   8   2  263.67   79.69
   2   8   2  146.99   20.20
  -2   8  -2  165.18   15.70
  -2   8  -2  194.78   17.80
   2   8   2  260.87   92.49
  -3  -8  -2  250.97   21.10
   3  -8   2  257.97   30.10
  -3  -8  -2  218.78   35.40
   3  -8   2  367.46  112.49
  -3  -8  -2  232.28   15.50
   3  -8   2  240.58   14.90
  -3   8  -2  254.87   18.70
   3   8   2  210.28   91.09
  -3   8  -2  231.98   18.00
  -3   8  -2  251.87   15.80
   3   8   2  185.08   24.00
  -3   8  -2  251.97   20.10
  -3   8  -2  233.78   13.80
   3   8   2  194.88   25.70
  -3   8  -2  248.98   16.70
  -4  -8  -2   63.99   22.70
  -4  -8  -2   69.69    6.30
  -4  -8  -2   67.69    5.20
   4  -8   2   86.49   27.60
  -4  -8  -2   55.09   15.50
   4  -8   2   74.59    8.00
  -4   8  -2   59.79    8.00
   4   8   2   58.69   16.90
   4   8   2  107.19   65.59
  -4   8  -2   81.69   15.40
  -4   8  -2   69.69    6.80
  -4   8  -2   72.99    8.80
   4   8   2   68.69   15.40
  -4   8  -2   69.49   10.60
  -4   8  -2   77.59   10.60
  -4   8  -2   65.19   10.10
  -4   8  -2   61.09    7.40
  -4   8  -2   67.59    8.80
  -4   8  -2   72.79    8.50
  -5  -8  -2   75.99    7.30
  -5  -8  -2   95.69    7.90
  -5  -8  -2  104.29    7.90
  -5  -8  -2  105.79    8.20
  -5  -8  -2   83.79    9.00
   5  -8   2  122.99   33.10
  -5  -8  -2  106.89    7.50
  -5  -8  -2  104.29   13.40
  -5   8  -2  105.29   13.80
   5   8   2  120.09   62.49
  -5   8  -2   96.49   10.20
  -5   8  -2  106.89   11.00
   5   8   2   92.09   18.90
  -5   8  -2  103.29    8.40
  -5   8  -2  101.09   10.60
  -5   8  -2  112.59    9.60
  -5   8  -2  106.59   12.90
  -5   8  -2  123.59   16.60
  -6  -8  -2   77.29    6.90
  -6  -8  -2   79.29    6.50
  -6  -8  -2   82.49    8.70
  -6  -8  -2   75.79    6.90
  -6  -8  -2   84.79    7.40
  -6  -8  -2   79.29   11.20
  -6  -8  -2   81.89    6.80
  -6   8  -2   81.69    7.40
  -6   8  -2  104.59   16.60
  -6   8  -2   78.19   11.70
  -6   8  -2   68.79    9.30
  -6   8  -2   82.49    9.60
  -6   8  -2   87.39    9.60
  -6   8  -2   79.89   12.50
   6   8   2   59.59   14.50
  -6   8  -2   65.29    9.50
  -7  -8  -2  204.38   12.90
  -7  -8  -2  228.48   13.50
  -7  -8  -2  204.18   12.00
  -7  -8  -2  214.38   14.60
  -7  -8  -2  234.38   13.80
  -7  -8  -2  206.48   12.20
  -7  -8  -2  212.08   11.90
  -7  -8  -2  191.38   14.30
  -7   8  -2  227.28   17.20
  -7   8  -2  229.78   12.90
  -7   8  -2  207.08   20.10
  -7   8  -2  214.88   18.40
  -7   8  -2  250.27   22.70
   7   8   2  207.58   23.30
  -7   8  -2  217.58   17.00
  -7   8  -2  225.68   16.30
  -7   8  -2  190.08   15.40
  -8  -8  -2    7.20    2.80
  -8  -8  -2    6.00    2.50
  -8  -8  -2    6.90    2.40
  -8  -8  -2    7.00    2.40
  -8  -8  -2    6.40    2.10
  -8   8  -2    3.20    3.20
  -8   8  -2   19.70    7.60
  -8   8  -2   13.70    7.00
  -8   8  -2    4.80    2.60
  -8   8  -2    7.30    2.30
  -8   8  -2    6.60    3.10
   8   8   2    1.40    5.50
  -8   8  -2    5.20    3.70
  -9  -8  -2   68.49    5.60
  -9  -8  -2   52.59    5.20
  -9  -8  -2   53.89    4.10
  -9  -8  -2   48.80    6.10
  -9  -8  -2   68.49    6.10
  -9   8  -2   83.29   11.50
  -9   8  -2   51.09    8.20
  -9   8  -2   66.39   10.40
  -9   8  -2   63.29    8.20
  -9   8  -2   56.69    5.10
   9   8   2   61.29    8.60
  -9   8  -2   50.89    7.60
 -10  -8  -2  103.39    7.60
 -10  -8  -2   74.49    5.10
 -10  -8  -2   91.49    5.40
 -10   8  -2   77.39    8.20
 -10   8  -2   85.69    8.30
 -10  -9   2   61.29    4.40
 -10  -9   2   56.99    4.00
 -10   9   2   59.69    4.70
 -10   9   2   71.59   11.20
  -9  -9   2  183.68   10.70
  -9  -9   2  255.57   13.50
  -9  -9   2  244.48   12.20
  -9  -9   2  238.88   11.50
  -9   9   2  221.98   18.00
  -9   9   2  176.38   17.80
  -9   9   2  212.58   15.10
  -9   9   2  246.18   12.00
   9   9  -2  205.58   24.10
  -9   9   2  209.28   11.00
  -9   9   2  233.68   11.30
  -8  -9   2  116.89    9.50
  -8  -9   2  112.09    8.30
  -8  -9   2  127.09    7.40
  -8  -9   2  114.49    8.50
  -8  -9   2  118.09    8.30
  -8  -9   2  117.59    8.10
  -8   9   2  115.89    8.70
  -8   9   2  113.69   14.20
  -8   9   2  149.88   17.50
  -8   9   2  120.39    8.50
  -8   9   2  127.89    9.30
  -8   9   2  129.19   12.40
  -8   9   2  134.79   16.00
   8   9  -2  125.59   17.40
  -7  -9   2    9.90    4.70
  -7  -9   2    8.10    2.40
  -7  -9   2    6.00    2.70
  -7  -9   2    5.80    2.30
  -7  -9   2    5.70    2.00
  -7  -9   2    6.30    2.50
  -7  -9   2    5.80    2.00
  -7   9   2   26.90   11.00
  -7   9   2    8.90    3.00
  -7   9   2    6.50    2.20
  -7   9   2    6.30    4.30
  -7   9   2    4.70    2.00
   7   9  -2    5.50    6.60
  -7   9   2    7.40    3.80
  -7   9   2    9.50    9.40
  -6  -9   2  359.16   18.30
  -6  -9   2  356.26   24.40
  -6  -9   2  358.16   17.60
  -6  -9   2  368.16   20.40
  -6   9   2  381.86   25.10
   6   9  -2  329.47   34.10
  -6   9   2  364.96   19.30
  -6   9   2  367.66   19.60
  -6   9   2  360.66   24.90
  -6   9   2  378.96   27.90
  -6   9   2  340.47   16.90
  -6   9   2  373.76   21.30
  -6   9   2  398.26   28.00
  -5  -9   2  412.26   21.20
  -5  -9   2  399.96   27.40
   5  -9  -2  400.36   54.99
  -5  -9   2  407.16   18.40
   5  -9  -2  324.87   23.00
  -5   9   2  328.47   26.50
  -5   9   2  378.26   20.40
   5   9  -2  356.36   35.70
  -5   9   2  440.96   28.70
  -5   9   2  385.26   24.90
  -5   9   2  366.76   18.10
  -5   9   2  373.76   22.50
   5   9  -2  447.56  138.49
   5   9  -2  414.86   62.29
  -5   9   2  330.97   24.00
  -5   9   2  365.16   19.80
  -4  -9   2  149.19   11.70
  -4  -9   2  158.58   11.60
   4  -9  -2  158.78   12.50
  -4  -9   2  144.49   12.00
   4  -9  -2  182.48   44.90
  -4  -9   2  151.58   16.40
   4  -9  -2  142.09   12.50
   4   9  -2  151.98   90.79
  -4   9   2  161.38   14.80
  -4   9   2  152.68   12.90
  -4   9   2  140.59   11.30
  -4   9   2  152.18   16.40
   4   9  -2  163.88   32.80
   4   9  -2  135.99   19.80
  -4   9   2  133.19   10.30
  -4   9   2  150.98   16.20
   4   9  -2  220.78   57.59
  -4   9   2  165.68   17.50
  -4   9   2  161.48   11.30
  -3  -9   2  252.17   14.80
  -3  -9   2  231.58   15.80
   3  -9  -2  255.77   16.30
  -3  -9   2  176.08   21.50
   3  -9  -2  221.28   41.60
  -3  -9   2  239.58   15.60
   3  -9  -2  237.48   15.90
  -3   9   2  238.88   15.50
   3   9  -2  196.68   26.90
  -3   9   2  250.17   20.20
   3   9  -2  248.98   48.00
  -3   9   2  252.47   14.80
   3   9  -2  226.28   22.60
  -3   9   2  246.58   21.00
  -3   9   2  263.97   18.10
  -3   9   2  234.48   19.80
  -2  -9   2 1448.46   56.19
  -2  -9   2 1358.16   54.49
  -2  -9   2 1289.97   63.49
   2  -9  -2 1293.87   54.49
   2  -9  -2 1361.46   55.39
   2  -9  -2 1254.67  102.89
  -2  -9   2 1390.06   96.09
   2  -9  -2 1285.27   63.29
  -2   9   2 1261.17   59.29
  -2   9   2 1356.06   60.09
  -2   9   2 1331.17   52.29
   2   9  -2 1108.29  177.28
  -2   9   2 1437.76   57.39
  -2   9   2 1263.07   63.69
   2   9  -2 1338.57   72.59
   2   9  -2 1338.07   65.19
   2   9  -2 1346.57  155.28
   2   9  -2 1470.65  122.89
  -1  -9   2 1176.58   50.59
  -1  -9   2 1246.98   59.49
  -1  -9   2 1245.08   89.79
  -1  -9   2 1175.68   49.10
   1  -9  -2 1086.89  123.09
   1  -9  -2 1186.68   49.99
   1  -9  -2 1166.38   49.50
   1  -9  -2 1170.08   57.49
  -1   9   2 1255.07   51.99
   1   9  -2 1104.49   64.59
  -1   9   2 1088.59   59.79
   1   9  -2 1227.98  153.08
   1   9  -2 1167.28   58.49
   1   9  -2 1143.69  135.19
  -1   9   2 1200.08   60.09
   0  -9  -2  531.25   27.40
   0  -9   2  555.04   45.10
   0  -9  -2  542.65   33.90
   0  -9   2  552.24   29.10
   0  -9   2  526.75   34.50
   0  -9   2  525.75   26.70
   0  -9  -2  539.15   65.99
   0  -9  -2  544.65   27.70
   0  -9   2  608.24   62.39
   0   9   2  550.24   27.80
   0   9  -2  549.45   95.59
   0   9   2  600.84   90.19
   0   9   2  550.94   36.60
   0   9  -2  507.75   33.00
  -1  -9  -2  217.78   15.40
   1  -9   2  248.98   21.90
   1  -9   2  273.37   28.90
  -1  -9  -2  253.67   21.40
  -1  -9  -2  254.87   16.80
   1  -9   2  232.88   15.50
   1   9   2  357.56   93.29
   1   9   2  227.28   66.09
  -1   9  -2  256.37   30.80
  -1   9  -2  216.18   61.29
  -1   9  -2  247.58   20.60
   1   9   2  235.88   23.40
   1   9   2  212.58   24.60
   2  -9   2   27.40   10.80
  -2  -9  -2   32.90    9.70
  -2  -9  -2   31.50    6.40
   2  -9   2   31.30    5.80
  -2  -9  -2   46.10    8.00
   2  -9   2   20.40   17.80
   2  -9   2   37.50   13.70
  -2  -9  -2   51.09   20.10
  -2   9  -2   38.80   10.10
  -2   9  -2   13.70    8.00
  -2   9  -2   50.49    9.30
  -2   9  -2   43.10    7.90
   2   9   2   27.40   13.10
   2   9   2   41.00   89.89
   2   9   2   25.70    8.80
  -2   9  -2   30.90    4.50
   3  -9   2  316.47   19.10
   3  -9   2  383.66   37.80
  -3  -9  -2  336.77   26.40
  -3  -9  -2  309.97   46.60
   3  -9   2  287.97   51.19
   3   9   2  413.46  106.59
  -3   9  -2  342.77   19.60
  -3   9  -2  335.17   17.80
  -3   9  -2  319.27   23.50
  -3   9  -2  349.87   25.60
  -3   9  -2  335.37   24.00
  -3   9  -2  329.27   20.60
   3   9   2  289.67   32.20
   3   9   2  259.27   29.20
   4  -9   2   76.99   33.40
  -4  -9  -2   20.00   21.00
  -4  -9  -2   22.10    3.70
  -4  -9  -2   29.60    9.50
  -4  -9  -2   25.60    4.40
  -4   9  -2   29.20    6.70
  -4   9  -2   21.50    5.20
  -4   9  -2   23.80    5.00
  -4   9  -2   26.00    8.40
   4   9   2   -0.90    7.80
   4   9   2   10.10   53.19
  -4   9  -2   19.70    5.50
  -4   9  -2    9.40    5.10
  -4   9  -2   40.20   10.70
  -4   9  -2   22.20    5.70
  -5  -9  -2   20.00    4.10
  -5  -9  -2   13.10    5.60
  -5  -9  -2   17.10    3.60
  -5  -9  -2   17.60    3.60
  -5  -9  -2   25.00    2.80
  -5   9  -2   15.10    5.00
  -5   9  -2   20.50    5.50
  -5   9  -2   18.50    6.70
  -5   9  -2   27.60    9.60
  -5   9  -2   19.00    5.60
  -5   9  -2   18.70    4.20
  -5   9  -2   -2.00    7.50
  -5   9  -2   18.80    4.80
   5   9   2   11.40    8.50
  -6  -9  -2  145.39   10.20
  -6  -9  -2  142.69   15.30
  -6  -9  -2  142.29    8.80
  -6  -9  -2  144.29    9.40
  -6   9  -2  154.78   17.70
  -6   9  -2  131.09   10.20
  -6   9  -2  126.19   15.00
  -6   9  -2  121.09   12.60
  -6   9  -2  155.28   16.90
   6   9   2  118.09   33.60
  -7  -9  -2  160.98   11.60
  -7  -9  -2  168.58   10.90
  -7  -9  -2  144.59   11.80
  -7  -9  -2  157.58    9.30
  -7  -9  -2  157.08   10.40
  -7  -9  -2  150.78   10.30
  -7   9  -2  152.78   12.90
   7   9   2  138.29   19.00
  -7   9  -2  160.18    9.80
  -7   9  -2  139.89   15.40
  -7   9  -2  138.09   12.00
  -7   9  -2  156.58   16.40
  -7   9  -2  141.29   13.80
  -7   9  -2  181.78   18.10
  -8  -9  -2    8.80    3.60
  -8  -9  -2   14.20    3.70
  -8  -9  -2   15.50    2.70
  -8  -9  -2   13.80    2.80
   8  -9   2   17.30    4.00
  -8   9  -2   18.50    4.60
  -8   9  -2   17.10    3.00
  -8   9  -2   24.30    8.20
  -8   9  -2   11.20    3.80
   8   9   2   13.50    6.40
  -8   9  -2    6.00    6.60
  -8   9  -2   14.40    6.70
  -8   9  -2   28.60   12.30
  -9  -9  -2   12.40    2.50
  -9  -9  -2    9.80    2.30
  -9  -9  -2    8.80    2.40
  -9   9  -2   16.00    6.20
  -9   9  -2   10.20    4.70
  -9   9  -2   25.10    6.20
   9   9   2   12.40    4.10
  -9 -10   2    6.90    1.50
  -9 -10   2    5.00    1.40
  -9 -10   2    6.50    1.80
  -9  10   2   12.80    7.50
  -9  10   2    7.80    2.40
  -9  10   2    9.00    3.20
   9  10  -2    4.60    3.60
  -8 -10   2   78.09    6.10
  -8 -10   2   91.69    6.20
  -8 -10   2   87.09    7.00
  -8 -10   2   80.39    6.00
  -8 -10   2   82.69    6.40
  -8  10   2   86.99    6.60
  -8  10   2   66.19    8.20
  -8  10   2   85.39   11.50
   8  10  -2   54.79   11.40
  -8  10   2   84.59    6.60
  -8  10   2   83.59    6.00
  -7 -10   2  267.67   13.90
  -7 -10   2  231.78   13.40
  -7 -10   2  241.38   15.70
  -7 -10   2  252.07   13.40
  -7 -10   2  270.87   15.10
  -7 -10   2  248.98   13.00
  -7  10   2  257.87   14.60
  -7  10   2  218.28   17.60
  -7  10   2  257.27   13.80
  -7  10   2  262.87   21.20
  -7  10   2  284.87   23.60
  -7  10   2  250.67   15.10
   7  10  -2  246.08   25.60
  -6 -10   2   40.90    4.50
  -6 -10   2   44.90    5.40
  -6 -10   2   32.00    8.10
  -6 -10   2   40.70    4.70
  -6  10   2   36.60    5.10
  -6  10   2   38.80    8.00
  -6  10   2   44.50    6.00
  -6  10   2   36.70    7.60
   6  10  -2   41.10   12.00
  -6  10   2   51.29   13.30
  -6  10   2   39.10    5.20
  -6  10   2   17.50   10.00
   5 -10  -2  631.04   29.80
  -5 -10   2  628.14   29.20
   5 -10  -2  667.13   30.70
  -5 -10   2  657.63   27.10
  -5 -10   2  654.23   37.90
  -5  10   2  607.84   31.30
  -5  10   2  651.53   34.90
  -5  10   2  581.44   36.60
  -5  10   2  672.03   37.70
  -5  10   2  638.94   29.30
   5  10  -2  633.44   47.90
  -5  10   2  615.04   26.30
   5  10  -2  643.24   42.20
  -5  10   2  635.44   29.10
  -4 -10   2  325.87   19.40
  -4 -10   2  293.47   18.10
   4 -10  -2  313.27   19.40
  -4 -10   2  348.27   26.20
  -4 -10   2  332.57   18.10
   4 -10  -2  336.17   19.60
  -4  10   2  323.47   24.70
  -4  10   2  338.57   18.30
  -4  10   2  327.27   18.40
   4  10  -2  335.17   33.80
  -4  10   2  324.07   24.50
  -4  10   2  362.86   23.40
   4  10  -2  324.17   29.00
  -4  10   2  317.97   16.60
  -4  10   2  283.07   22.20
  -4  10   2  335.47   20.70
  -3 -10   2   -3.80    1.70
  -3 -10   2   -2.30    2.00
   3 -10  -2   -5.40    2.30
  -3 -10   2    1.10    2.40
  -3 -10   2    1.20    2.40
   3 -10  -2    3.80    2.60
  -3  10   2    0.20    3.30
  -3  10   2    0.50    1.50
   3  10  -2   -0.30    4.60
  -3  10   2    1.50    2.40
  -3  10   2    0.10    1.80
   3  10  -2   -1.80    6.30
  -3  10   2    3.90    5.00
  -2 -10   2 1709.23   66.69
   2 -10  -2 1723.53   66.79
   2 -10  -2 1594.74   66.79
  -2 -10   2 1596.54  110.19
  -2 -10   2 1620.74   76.39
   2 -10  -2 1710.63  127.69
   2 -10  -2 1670.83   76.79
  -2  10   2 1539.25   65.39
   2  10  -2 1713.83   78.79
  -2  10   2 1608.94   65.29
  -2  10   2 1578.14   67.39
  -2  10   2 1598.14   70.59
   2  10  -2 1612.94  138.09
   1 -10  -2  519.15   27.40
   1 -10  -2  499.45   61.59
  -1 -10   2  541.95   28.50
   1 -10  -2  522.45   27.40
   1 -10  -2  509.05   34.00
  -1 -10   2  535.85   64.09
  -1 -10   2  496.35   34.40
  -1 -10   2  515.85   26.90
  -1  10   2  529.45   28.10
   1  10  -2  562.64   36.50
  -1  10   2  461.85   36.20
  -1  10   2  559.14   37.10
   1  10  -2  502.05   40.20
   0 -10   2 1417.16   57.59
   0 -10  -2 1402.96  108.89
   0 -10  -2 1334.17   57.49
   0 -10   2 1319.67  106.59
   0 -10  -2 1556.14   89.79
   0 -10  -2 1422.16   58.59
   0 -10   2 1459.55   59.79
   0  10   2 1215.48   68.89
   0  10  -2 1248.98   71.39
   0  10   2 1460.05   58.19
   0  10   2 1438.16   71.59
   0  10  -2 1417.46   67.79
   1 -10   2    8.30    3.80
   1 -10   2   -8.00   17.50
  -1 -10  -2   10.30    4.00
   1 -10   2    7.50    4.00
  -1 -10  -2   15.10   21.50
   1 -10   2   23.00    9.10
  -1 -10  -2    6.10    3.70
  -1  10  -2   -0.60    4.70
   1  10   2   -1.10    6.10
   1  10   2 -131.69   98.39
   1  10   2   19.80    9.40
  -2 -10  -2   30.80    6.80
   2 -10   2   71.89   32.90
   2 -10   2   36.70   10.80
   2 -10   2   43.00   14.50
   2 -10   2   56.39   12.10
  -2 -10  -2   45.80    8.00
   2 -10   2   33.80    7.30
  -2 -10  -2   39.40   11.10
  -2  10  -2   54.59   10.00
   2  10   2   64.49   21.10
  -2  10  -2   39.10    9.30
   2  10   2   26.00   81.19
  -2  10  -2   45.40    5.60
  -2  10  -2   41.50    8.40
   2  10   2   41.30   14.20
  -3 -10  -2  319.77   50.19
   3 -10   2  357.96   21.20
  -3 -10  -2  365.46   29.00
   3 -10   2  428.66   64.79
  -3  10  -2  391.26   24.00
   3  10   2  368.86   32.80
   3  10   2  474.85  128.39
  -3  10  -2  383.86   19.80
   3  10   2  344.57   34.60
  -3  10  -2  391.16   28.00
  -3  10  -2  337.17   25.70
  -3  10  -2  400.66   23.80
  -3  10  -2  377.46   26.20
  -4 -10  -2  172.48   10.60
   4 -10   2  161.78   12.70
  -4 -10  -2  133.19   10.70
  -4 -10  -2  168.78   18.50
  -4  10  -2  180.58   15.10
   4  10   2  194.28   22.80
  -4  10  -2  163.58   14.80
  -4  10  -2  175.08   12.40
  -4  10  -2  174.48   12.90
   4  10   2  162.48   23.70
  -4  10  -2  196.98   19.00
  -4  10  -2  163.08   11.20
  -4  10  -2  161.68   18.10
  -4  10  -2  164.78   14.10
  -5 -10  -2   88.29    7.70
  -5 -10  -2   95.39    7.20
  -5 -10  -2  102.49    7.70
   5 -10   2  102.69    9.30
  -5 -10  -2   85.69    6.20
  -5 -10  -2  108.49   14.10
  -5  10  -2   86.69    9.20
   5  10   2  108.39   17.50
  -5  10  -2   96.49   16.10
   5  10   2   85.89   20.70
  -5  10  -2   80.09   12.30
  -5  10  -2   94.29   10.30
  -5  10  -2  118.29   14.70
  -5  10  -2   86.29    8.00
  -6 -10  -2   15.90    3.50
  -6 -10  -2   21.60    3.30
  -6 -10  -2    9.80    5.50
  -6 -10  -2   21.20    3.70
  -6  10  -2   25.70   10.40
  -6  10  -2   24.20    3.50
   6  10   2   15.40    7.90
  -6  10  -2   19.40    5.50
  -6  10  -2   21.20    6.60
  -6  10  -2   19.30    4.90
  -6  10  -2   18.10    4.40
   7 -10   2   67.29    7.90
  -7 -10  -2   63.49    5.90
  -7 -10  -2   65.29    5.90
  -7 -10  -2   61.89    4.80
  -7 -10  -2   60.39    6.40
  -7  10  -2   61.59    7.70
   7  10   2   61.99   12.80
  -7  10  -2   57.39    9.10
  -7  10  -2   58.99    7.60
  -7  10  -2   66.89    5.40
  -7  10  -2   61.09    9.40
  -8 -10  -2   44.70    4.60
  -8 -10  -2   37.40    3.70
  -8 -10  -2   37.30    3.80
  -8  10  -2   47.60    8.30
  -8  10  -2   42.00    4.90
  -8  10  -2   23.00    6.10
  -8  10  -2   45.20    7.00
  -8  10  -2   35.00    3.30
   8  10   2   42.60    7.70
  -9 -10  -2   51.39    3.60
  -9  10  -2   57.59    7.10
  -9 -11   2   14.80    1.70
  -9  11   2   17.60    3.30
  -8 -11   2   36.20    3.70
  -8 -11   2   42.60    3.60
  -8 -11   2   43.30    3.90
  -8  11   2   42.10    3.90
   8  11  -2   52.19   10.00
  -8  11   2   46.10    5.80
  -8  11   2   39.90    3.60
  -8  11   2   42.60    8.40
  -7 -11   2  100.79    7.30
  -7 -11   2   94.99    6.40
  -7 -11   2   92.29    6.60
  -7 -11   2   80.49    6.60
  -7 -11   2  100.09    6.90
  -7  11   2   98.49   11.30
  -7  11   2  105.99   11.80
   7  11  -2   94.79   14.90
  -7  11   2   95.09    7.50
  -7  11   2  101.69    9.20
  -7  11   2  105.89    6.90
  -6 -11   2   41.60    4.40
  -6 -11   2   43.70    4.90
  -6 -11   2   36.80    3.90
  -6 -11   2   27.20    7.20
  -6 -11   2   36.30    4.30
  -6  11   2   28.60   10.90
   6  11  -2   35.90   11.20
  -6  11   2   41.60    6.70
  -6  11   2   28.00    7.50
  -6  11   2   29.50    5.40
  -6  11   2   39.50    4.80
  -6  11   2   36.10    4.50
  -5 -11   2   24.20    3.70
   5 -11  -2   20.20    4.80
  -5 -11   2   25.00    3.50
  -5 -11   2   19.70    3.50
  -5 -11   2   24.50    6.30
   5 -11  -2   27.80    4.80
  -5  11   2   18.00    3.60
  -5  11   2   17.80    5.60
   5  11  -2   24.90    9.80
  -5  11   2   17.20    3.70
  -5  11   2   21.10    4.10
  -5  11   2    5.00    7.80
  -5  11   2   16.70    5.60
   5  11  -2    3.40    7.80
  -5  11   2   13.80    4.00
  -4 -11   2   99.79   15.40
   4 -11  -2   96.79    9.20
  -4  11   2   91.79   10.70
  -4  11   2   73.49   11.30
  -4  11   2   84.79   10.20
  -4  11   2   87.99   13.30
  -4  11   2   92.09    7.20
   4  11  -2   97.39   20.30
  -4  11   2   87.09    7.80
  -4  11   2   93.69    9.70
   3 -11  -2 1322.67   55.79
   3 -11  -2 1285.97   55.19
  -3 -11   2 1340.17   55.99
  -3 -11   2 1316.17   54.69
  -3 -11   2 1346.87   65.89
  -3  11   2 1402.66   57.09
   3  11  -2 1369.46   75.89
  -3  11   2 1299.37   63.49
   3  11  -2 1391.66   69.09
  -3  11   2 1348.47   58.89
  -3  11   2 1303.87   53.69
  -3  11   2 1337.67   53.29
  -2 -11   2    6.30    3.20
  -2 -11   2   13.30    5.70
  -2 -11   2    2.50    3.00
   2 -11  -2    3.20    3.20
   2 -11  -2    4.90    2.90
   2 -11  -2    4.40    5.10
  -2  11   2    6.20    2.90
   2  11  -2   -5.80    6.90
  -2  11   2    5.80    3.00
  -2  11   2    4.00    2.60
   2  11  -2    7.20    5.90
  -2  11   2    5.60    4.60
  -1 -11   2  485.65   66.99
  -1 -11   2  504.05   34.60
  -1 -11   2  516.55   27.90
   1 -11  -2  491.85   34.30
   1 -11  -2  476.05   66.19
  -1 -11   2  527.45   27.00
   1 -11  -2  524.65   27.50
   1 -11  -2  466.35   26.60
  -1  11   2  558.64   38.00
   1  11  -2  445.26   38.50
   1  11  -2  529.05   36.20
  -1  11   2  508.05   27.60
  -1  11   2  516.65   24.80
   0 -11   2  756.42   35.00
   0 -11  -2  779.22   36.20
   0 -11   2  741.63   43.90
   0 -11  -2  693.93   34.90
   0 -11  -2  771.92   81.99
   0 -11   2  676.93   76.99
   0 -11  -2  692.73   43.90
   0 -11   2  724.33   36.30
   0  11  -2  678.93   46.70
   0  11   2  715.63   34.50
   0  11   2  660.33   43.30
   0  11   2  721.93   46.50
   0  11  -2  737.53   41.50
   0  11  -2  733.13   44.10
   1 -11   2  145.89   13.70
  -1 -11  -2  166.28   13.70
   1 -11   2  167.08   18.40
  -1 -11  -2  147.59   18.10
   1 -11   2  153.78   12.90
  -1 -11  -2  147.49   12.90
  -1  11  -2  165.68   16.90
   1  11   2  167.08   20.70
  -1  11  -2  172.38   18.10
   1  11   2  153.68   21.10
   2 -11   2  722.13   37.30
   2 -11   2  738.83   45.10
  -2 -11  -2  764.62   45.80
  -2 -11  -2  782.12   36.70
  -2 -11  -2  730.83   35.40
   2 -11   2  743.63   35.10
   2  11   2  663.43   45.90
  -2  11  -2  744.13   42.00
  -2  11  -2  737.93   42.40
   2  11   2  720.23   49.00
  -2  11  -2  759.12   32.70
   3 -11   2  114.99   11.50
  -3 -11  -2  141.99   16.50
  -3 -11  -2  120.09    7.90
   3 -11   2  126.89   10.70
  -3  11  -2  106.89   12.80
   3  11   2   64.39   15.50
   3  11   2  137.69   18.50
  -3  11  -2  110.99    9.00
  -3  11  -2   93.89   11.20
  -3  11  -2  115.89   12.40
  -3  11  -2  112.59   14.00
  -4 -11  -2  114.79    7.90
   4 -11   2  110.39   11.60
  -4 -11  -2  125.79   15.30
   4 -11   2  120.99   10.70
  -4 -11  -2  125.79    8.30
   4  11   2  110.89   21.10
  -4  11  -2  118.49   14.10
  -4  11  -2  116.49   11.60
   4  11   2  125.69   17.60
  -4  11  -2  113.29   12.30
  -4  11  -2  113.29   12.30
  -4  11  -2  122.59    9.00
  -4  11  -2  118.79    9.80
  -5 -11  -2   40.70    4.50
  -5 -11  -2   43.90    4.20
   5 -11   2   43.10    6.00
  -5 -11  -2   40.30   10.00
   5 -11   2   38.70    6.90
  -5 -11  -2   43.80    4.90
  -5  11  -2   42.80    6.80
  -5  11  -2   46.90    5.00
  -5  11  -2   45.30    8.40
  -5  11  -2   39.50    8.00
   5  11   2   34.70   13.20
  -5  11  -2   34.20    7.70
   5  11   2   32.90   10.40
  -5  11  -2   40.40    5.10
  -6 -11  -2   78.99    6.00
   6 -11   2   76.59    7.90
  -6 -11  -2   71.79    5.20
  -6 -11  -2   80.29    6.50
  -6 -11  -2   81.79   10.60
  -6  11  -2   71.89    6.40
  -6  11  -2   80.39   10.70
  -6  11  -2   87.59   10.90
  -6  11  -2   69.69    7.90
  -6  11  -2   64.39    8.10
   6  11   2   61.19   12.90
  -7 -11  -2   62.29    4.90
  -7 -11  -2   54.29    5.30
   7 -11   2   48.40    5.00
  -7 -11  -2   67.49    5.30
  -7  11  -2   56.29    6.20
  -7  11  -2   41.40    7.80
  -7  11  -2   73.29   10.40
  -7  11  -2   42.90    7.00
  -7  11  -2   60.89    5.10
   7  11   2   58.29   10.80
  -8 -11  -2   28.40    3.00
  -8 -11  -2   37.10    3.20
  -8  11  -2   32.20    6.40
   8  11   2   32.50    4.60
  -8  11  -2   27.50    4.80
  -8 -12   2   18.80    2.40
  -8  12   2   17.10    1.90
  -8  12   2   16.80    3.40
   8  12  -2   12.50    4.30
  -7 -12   2   36.30    3.10
  -7 -12   2   40.00    3.40
  -7 -12   2   41.90    3.70
  -7  12   2   31.00    4.70
  -7  12   2   41.00    3.80
  -7  12   2   32.70    3.60
   7  12  -2   25.50    6.90
  -6 -12   2  135.29    8.40
  -6 -12   2  143.49    8.40
  -6 -12   2  144.69   11.90
  -6 -12   2  143.39    7.90
  -6  12   2  145.39    8.30
  -6  12   2  157.58   12.50
  -6  12   2  142.19    9.00
   6  12  -2  137.29   17.50
  -6  12   2  124.59   11.80
  -6  12   2  150.18    9.90
  -5 -12   2    4.70    1.70
   5 -12  -2    1.30    2.40
  -5 -12   2    1.70    2.60
  -5 -12   2    0.80    1.20
  -5  12   2    5.80    1.80
  -5  12   2    3.00    1.80
   5  12  -2   -8.80    5.30
  -5  12   2    1.80    2.20
   5  12  -2    5.00    5.10
  -5  12   2    4.40    3.00
  -4 -12   2    6.70    4.20
  -4 -12   2    7.20    2.00
   4 -12  -2   11.10    3.60
   4 -12  -2    6.30    3.70
  -4 -12   2    3.50    2.90
  -4  12   2    7.40    2.60
  -4  12   2    8.80    3.10
   4  12  -2    4.80    5.70
  -4  12   2    5.20    3.00
  -4  12   2    5.50    3.60
  -4  12   2    5.40    2.20
   4  12  -2    9.70    6.50
  -4  12   2    8.00    4.00
  -4  12   2    0.10    3.40
   3 -12  -2  297.57   18.30
  -3 -12   2  312.67   24.80
  -3 -12   2  308.37   18.60
   3 -12  -2  320.77   19.00
  -3 -12   2  307.17   17.80
   3  12  -2  306.87   30.50
  -3  12   2  302.17   16.80
   3  12  -2  306.97   26.30
  -3  12   2  292.97   20.00
  -3  12   2  332.67   23.70
  -3  12   2  316.37   19.30
  -3  12   2  305.07   15.30
  -3  12   2  306.37   16.80
  -2 -12   2   80.79   10.60
   2 -12  -2   74.39    8.50
  -2 -12   2   71.79    8.70
  -2 -12   2   78.69   12.40
  -2  12   2   76.39   18.60
  -2  12   2   78.79    7.90
   2  12  -2   75.29   16.20
  -2  12   2   99.89   10.30
   2  12  -2   86.99   11.10
   2  12  -2   73.69   15.00
  -1 -12   2   97.89   10.20
  -1 -12   2   99.29   10.10
   1 -12  -2  110.29   15.60
   1 -12  -2  108.29   10.30
  -1 -12   2  109.29   14.00
   1 -12  -2  110.29   10.80
  -1  12   2   89.99    8.40
  -1  12   2  117.49   10.70
  -1  12   2   96.59   14.70
   1  12  -2  130.49   16.90
   1  12  -2  103.29   14.60
   0 -12   2  215.78   21.00
   0 -12  -2  222.88   15.80
   0 -12   2  207.48   15.30
   0 -12  -2  218.08   21.40
   0 -12   2  207.28   16.10
   0 -12  -2  202.18   15.40
   0  12   2  209.78   22.30
   0  12  -2  249.18   23.70
   0  12   2  201.38   14.50
   0  12  -2  256.47   23.00
   0  12  -2  263.67   23.00
   0  12   2  210.28   13.60
   0  12   2  224.48   20.20
  -1 -12  -2  168.48   13.50
   1 -12   2  180.98   14.70
   1 -12   2  181.38   18.50
   1 -12   2  165.48   14.60
  -1 -12  -2  192.48   17.10
  -1 -12  -2  188.68   19.90
  -1  12  -2  178.48   12.50
  -1  12  -2  160.98   18.10
   1  12   2  167.58   21.40
   1  12   2  173.98   20.10
  -1  12  -2  176.98   24.70
   2 -12   2    8.20    3.40
   2 -12   2    8.20    3.60
  -2 -12  -2   12.60    4.90
   2  12   2    0.10    6.20
  -2  12  -2    8.60    4.30
  -2  12  -2   14.70    3.80
  -2  12  -2    7.30    5.40
   2  12   2    9.30    5.60
  -2  12  -2    8.60    3.60
   3 -12   2   61.09    7.70
  -3 -12  -2   55.99    8.80
  -3 -12  -2   56.89    4.70
   3 -12   2   42.80    6.40
   3  12   2   52.99   12.50
   3  12   2   58.39   13.50
  -3  12  -2   54.79    5.90
  -3  12  -2   56.59    7.90
  -3  12  -2   44.90    8.40
  -3  12  -2   64.09    9.50
  -3  12  -2   51.39    6.20
  -4 -12  -2   41.50   10.50
   4 -12   2   39.20    5.50
  -4 -12  -2   39.40    3.70
   4 -12   2   38.10    5.70
  -4 -12  -2   42.90    4.10
   4  12   2   31.80   10.00
  -4  12  -2   36.60    5.60
   4  12   2   38.00    8.70
  -4  12  -2   34.20    4.30
  -4  12  -2   16.90    7.50
  -4  12  -2   37.30    5.80
  -4  12  -2   38.90    7.70
  -4  12  -2   37.30    5.50
   5 -12   2   35.10    5.40
   5 -12   2   36.30    5.00
  -5 -12  -2   38.50    4.20
  -5 -12  -2   26.40    7.30
  -5 -12  -2   33.80    3.60
  -5  12  -2   34.00    3.80
  -5  12  -2   31.30    8.20
  -5  12  -2   35.80    7.00
  -5  12  -2   38.60    5.90
   5  12   2   30.80    8.90
   5  12   2   40.60    9.90
   6 -12   2   29.60    3.50
  -6 -12  -2   18.50    2.70
  -6 -12  -2   20.50    2.50
  -6 -12  -2   25.30    3.50
   6  12   2   32.60    7.80
  -6  12  -2   19.80    7.10
  -6  12  -2   22.20    4.60
  -6  12  -2   19.10    5.30
  -6  12  -2   22.30    2.70
  -7 -12  -2   83.09    5.70
  -7 -12  -2   86.59    5.20
  -7  12  -2   85.89    8.70
  -7  12  -2   71.09    7.50
  -7  12  -2   76.09    6.10
   7  12   2   90.79    8.80
  -7 -13   2   41.10    3.10
  -7  13   2   51.39    3.90
  -7  13   2   36.10    4.90
  -6 -13   2   10.10    1.90
  -6 -13   2   10.80    1.60
  -6 -13   2   10.00    2.20
  -6 -13   2   10.60    1.70
   6  13  -2   13.20    4.60
  -6  13   2   11.30    2.30
  -6  13   2    6.20    1.60
  -6  13   2   10.00    2.90
  -5 -13   2   27.70    6.70
  -5 -13   2   35.30    3.20
  -5 -13   2   37.90    3.60
  -5 -13   2   28.60    3.30
  -5  13   2   31.70    4.20
   5  13  -2   22.60    7.50
  -5  13   2   39.00    3.60
  -5  13   2   37.50    5.40
  -5  13   2   40.30    4.10
   5  13  -2   31.20    9.00
  -4 -13   2   20.60    6.30
   4 -13  -2   21.50    3.70
  -4 -13   2   21.90    2.60
  -4 -13   2   19.90    2.80
  -4  13   2   18.90    3.30
  -4  13   2   25.70    3.50
  -4  13   2   16.50    4.30
   4  13  -2   18.20    6.90
  -4  13   2   15.30    3.70
   3 -13  -2   30.60    4.30
  -3 -13   2   31.70    9.20
  -3 -13   2   23.20    4.90
   3  13  -2   30.20    8.00
  -3  13   2   30.60    5.70
  -3  13   2   29.90    4.10
   3  13  -2   29.70    8.80
  -3  13   2   28.10    5.50
   3  13  -2   32.40    4.70
  -3  13   2   33.30    6.90
  -2 -13   2   18.30    4.30
   2 -13  -2   18.80    4.60
  -2 -13   2    9.00    3.30
   2 -13  -2   14.40    3.90
  -2 -13   2   19.20    5.80
  -2  13   2   14.80    3.70
   2  13  -2   19.20    4.40
  -2  13   2   16.50    4.20
  -2  13   2   17.70    3.90
   2  13  -2   12.80    6.20
   2  13  -2   22.10    7.80
  -2  13   2   13.60    5.40
  -2  13   2   19.30    5.20
   2  13  -2   16.10    4.60
  -2  13   2   14.40    3.00
   1 -13  -2   84.99   15.00
  -1 -13   2   82.79    8.80
  -1 -13   2   88.99   12.30
  -1 -13   2   83.49    8.60
   1 -13  -2   94.29    9.40
   1 -13  -2   88.09    8.70
  -1  13   2   89.59    7.90
   1  13  -2   67.39   12.80
   1  13  -2   78.99    9.40
  -1  13   2   87.59    7.50
   1  13  -2   91.09    8.90
  -1  13   2   93.39    8.70
  -1  13   2   74.89   13.70
   0 -13   2   87.99    8.90
   0 -13   2   92.39    9.30
   0 -13   2   99.89   12.70
   0 -13  -2   91.19    9.00
   0 -13  -2   90.49   13.60
   0  13   2   93.69   14.20
   0  13  -2   78.29    9.90
   0  13  -2   89.39    7.60
   0  13   2   91.09    8.20
   0  13   2   84.69    7.40
   0  13  -2   98.89    9.70
   0  13  -2  115.39   14.60
   1 -13   2  177.18   13.50
   1 -13   2  182.68   13.20
  -1 -13  -2  189.48   18.90
   1 -13   2  158.38   18.80
  -1  13  -2  172.88   11.30
   1  13   2  188.18   11.50
   1  13   2  166.18   19.00
  -1  13  -2  183.48   17.30
  -1  13  -2  173.88   13.70
  -1  13  -2  174.08   15.50
  -2 -13  -2  224.58   20.50
   2 -13   2  222.08   15.30
   2 -13   2  224.68   14.40
   2  13   2  213.18   19.00
   2  13   2  197.18   20.20
  -2  13  -2  216.58   18.10
  -2  13  -2  172.48   15.90
  -2  13  -2  219.18   12.50
  -2  13  -2  211.88   15.20
   3 -13   2   77.69    8.00
  -3 -13  -2   79.19   11.10
   3 -13   2   95.99   10.00
  -3  13  -2   79.39    8.60
  -3  13  -2   93.09    6.90
  -3  13  -2   71.99   10.30
   3  13   2   77.49   16.80
  -3  13  -2   73.89    6.70
  -3  13  -2   63.39    8.70
  -4 -13  -2   29.60    3.50
   4 -13   2   29.50    5.00
   4 -13   2   21.00    6.20
  -4 -13  -2   42.20    7.20
  -4  13  -2   35.60    3.80
  -4  13  -2   27.60    4.80
  -4  13  -2   31.00    6.00
  -4  13  -2   34.90    5.50
   4  13   2   27.00    6.60
   4  13   2   14.90    6.90
  -5 -13  -2  103.99    6.50
   5 -13   2  107.49    7.80
   5 -13   2   82.69    7.50
   5  13   2  115.19   11.80
  -5  13  -2   87.59    9.40
  -5  13  -2   83.29    7.90
  -5  13  -2  117.99    7.30
  -6 -13  -2   26.80    2.70
  -6 -13  -2   41.30    3.60
  -6  13  -2   37.70    4.20
  -6  13  -2   31.40    4.50
   6  13   2   39.30    5.70
  -5 -14   2   39.40    3.50
  -5 -14   2   38.10    2.90
  -5  14   2   39.20    4.30
   5  14  -2   46.60    6.80
  -5  14   2   39.20    3.60
  -5  14   2   41.00    3.40
  -4 -14   2    8.00    1.50
  -4 -14   2    7.80    1.60
  -4 -14   2    5.60    1.70
  -4  14   2    7.00    2.00
  -4  14   2    3.90    1.30
   4  14  -2    5.10    4.40
   4  14  -2    4.30    5.70
  -4  14   2    5.20    2.20
  -3 -14   2  328.07   13.70
  -3 -14   2  339.07   22.20
   3  14  -2  377.86   24.80
  -3  14   2  290.77   13.70
  -3  14   2  373.36   14.40
  -3  14   2  327.17   17.50
  -3  14   2  299.67   15.10
  -3  14   2  324.97   16.90
  -2 -14   2  160.18   10.50
  -2 -14   2  156.08   14.50
  -2  14   2  148.99   12.10
  -2  14   2  167.58    9.60
  -2  14   2  171.38    9.30
  -2  14   2  172.88   11.40
  -2  14   2  163.28   13.60
   2  14  -2  168.98   14.40
   2  14  -2  158.88   11.20
   2  14  -2  170.48   16.60
  -1 -14   2   68.79   10.10
  -1 -14   2   80.09    7.30
  -1 -14   2   67.79    6.90
  -1  14   2   59.29    6.60
  -1  14   2   58.19    7.00
   1  14  -2   77.29    6.30
   1  14  -2   66.79    6.60
  -1  14   2   70.59    5.80
  -1  14   2   67.09    9.90
  -1  14   2   62.49    5.50
   1  14  -2   61.99    6.50
   1  14  -2   56.89   11.00
   0 -14   2   63.49    9.00
   0 -14   2   59.19    6.80
   0 -14   2   65.69   10.70
   0 -14  -2   92.79   11.80
   0  14   2   70.19   16.70
   0  14   2   74.09    6.20
   0  14  -2   72.69   18.10
   0  14  -2   68.19    7.60
   0  14  -2   66.79    6.80
   0  14  -2   62.39    5.70
   0  14   2   74.79    6.00
  -1 -14  -2  233.58   19.50
   1 -14   2  252.97   14.40
   1 -14   2  252.97   14.90
   1  14   2  234.78   12.50
   1  14   2  230.18   12.10
  -1  14  -2  185.68   14.20
   1  14   2  214.48   19.20
  -1  14  -2  246.08   14.80
  -1  14  -2  208.58   11.90
  -1  14  -2  232.48   18.10
   2 -14   2  281.17   15.30
  -2 -14  -2  284.97   21.60
   2 -14   2  274.07   15.50
  -2  14  -2  277.37   16.20
  -2  14  -2  235.08   13.50
   2  14   2  288.17   13.40
   2  14   2  255.07   14.30
   2  14   2  279.67   13.90
  -2  14  -2  270.77   17.30
   2  14   2  278.37   21.60
  -2  14  -2  280.87   13.40
   3 -14   2   11.80    2.70
   3 -14   2   18.60    3.40
  -3 -14  -2   22.70    5.70
  -3 -14  -2   25.20    2.80
   3  14   2   18.20    4.90
  -3  14  -2   21.20    3.20
   3  14   2   25.80    3.20
  -3  14  -2   24.10    6.40
  -3  14  -2   15.30    3.40
   3  14   2   19.00    4.50
   3  14   2   21.70    4.70
  -3  14  -2   21.40    2.70
  -4 -14  -2    9.30    2.00
   4 -14   2   16.30    2.50
   4 -14   2    7.70    2.20
   4  14   2   11.40    1.90
  -4  14  -2   12.20    1.80
   4  14   2    8.70    1.80
   4  14   2    8.50    3.20
   4  14   2    9.20    4.40
  -4  14  -2    8.90    2.80
  -4  14  -2   12.80    3.30
  -5 -14  -2    1.20    0.90
  -5 -14  -2    2.70    0.90
   4  15  -2   15.00    2.10
  -3  15   2   54.89    4.30
  -3  15   2   46.40    3.50
   3  15  -2   50.69    3.70
   3  15  -2   48.60    6.90
  -2 -15   2   44.30    3.00
   2  15  -2   29.90    5.90
  -2  15   2   45.20    4.30
  -2  15   2   37.30    3.30
   2  15  -2   53.59    4.10
  -1 -15   2   19.80    2.00
  -1  15   2   17.30    3.90
   1  15  -2   13.20    4.50
   1  15  -2   24.50    3.30
  -1  15   2   13.20    2.80
  -1  15   2   14.80    2.10
   0 -15   2    0.30    1.20
   0 -15   2    8.10    2.30
   0  15  -2    3.00    1.40
   0  15   2    3.40    1.60
   0  15   2    3.00    2.40
   0  15  -2    2.60    2.90
   0  15  -2    3.10    1.40
   0  15   2    2.00    1.30
   0  15  -2    3.20    1.70
   1 -15   2   69.89    5.70
  -1  15  -2   68.69    5.60
   1  15   2   73.89    4.50
  -1  15  -2   64.89    4.90
   1  15   2   53.79    4.90
  -1  15  -2   66.79    7.20
  -1  15  -2   73.79    4.80
  -2 -15  -2   13.00    1.70
   2 -15   2   10.10    2.20
  -2  15  -2   14.80    2.40
  -2  15  -2   11.80    1.60
   2  15   2    8.20    1.80
   2  15   2    8.20    3.10
   2  15   2    9.00    1.60
  -3 -15  -2  157.88    7.30
  -3  15  -2  155.48    9.50
   3  15   2  164.28   12.90
 -12   0   3  293.77   12.70
 -12   0   3  291.57   13.80
 -11   0   3    1.90    1.50
 -11   0   3    0.70    1.10
 -11   0   3   -0.50    1.10
 -11   0   3    0.80    2.40
 -11   0   3    0.80    1.10
 -11   0   3    9.40    4.10
 -11   0   3    2.40    1.70
 -11   0   3    0.20    1.80
 -11   0   3    2.90    2.20
 -10   0   3   10.20    2.30
 -10   0   3    5.70    3.20
 -10   0   3   11.90    5.40
 -10   0   3   11.90    2.80
 -10   0   3   10.60    3.80
 -10   0   3    9.30    3.90
 -10   0   3    8.00    3.10
 -10   0   3   10.60    2.90
 -10   0   3   11.80    3.70
 -10   0   3   11.20    3.10
 -10   0   3   10.10    2.40
 -10   0   3   11.40    3.30
 -10   0   3   26.20    6.50
  -9   0   3   41.20    6.10
  -9   0   3   32.70    6.50
  -9   0   3   41.30    4.80
  -9   0   3   39.60    6.00
  -9   0   3   40.60    5.50
  -9   0   3   39.00    4.80
  -9   0   3   49.90    8.30
  -9   0   3   37.40    6.10
  -9   0   3   40.60    5.00
  -9   0   3   43.90    5.60
  -9   0   3   39.60    6.20
  -9   0   3   44.50    5.70
  -9   0   3   41.20   11.90
  -9   0   3   58.49   10.80
  -9   0   3   40.10    5.90
  -9   0   3   34.90   10.90
  -8   0   3   52.59    7.20
   8   0  -3    6.00   68.79
  -8   0   3   68.59   16.20
  -8   0   3   61.89    6.60
  -8   0   3   42.90    5.20
  -8   0   3   45.20    6.20
  -8   0   3   53.89    7.10
  -8   0   3   52.49    5.20
  -8   0   3   49.50    6.30
  -8   0   3   36.10    5.70
  -8   0   3   49.30    5.60
  -8   0   3   53.99    6.30
  -8   0   3   50.39    6.90
  -8   0   3   49.90    6.90
  -8   0   3   66.39   25.40
  -8   0   3   65.39   10.50
  -8   0   3   45.80   11.50
   8   0  -3  162.88   51.59
  -8   0   3   43.90   12.10
  -8   0   3   56.09    6.90
  -7   0   3   63.49    7.00
   7   0  -3   93.59   44.00
  -7   0   3   61.19    5.60
   7   0  -3   70.29   58.79
  -7   0   3   67.29    5.50
  -7   0   3   64.39    6.60
  -7   0   3   70.39    6.70
  -7   0   3   63.99    5.90
  -7   0   3   60.29    6.70
  -7   0   3   51.29    6.50
  -7   0   3   59.79    7.10
  -7   0   3   92.99   21.50
  -7   0   3   55.39    6.20
  -7   0   3   54.29   11.40
  -7   0   3   58.19    6.90
  -7   0   3   57.89    6.90
  -7   0   3   59.29    5.40
  -7   0   3   65.59   11.00
   6   0  -3   47.30   28.00
   6   0  -3  111.89   62.49
   5   0  -3 3681.13  272.87
   5   0  -3 3434.46  212.68
   4   0  -3 7288.87  392.16
   4   0  -3 6251.67  317.67
   3   0  -3   84.99   28.40
   2   0  -3   88.79   29.70
  -2   0   3   72.19    7.90
   2   0  -3   96.39    8.60
  -1   0   3  191.98   14.30
   1   0  -3  187.28   30.20
   0   0  -3 4506.65  196.88
   0   0   3 4613.54  173.58
   0   0   3 4841.72  210.48
  -1   0  -3 9999.00  340.47
   1   0   3 8933.91  343.97
   1   0   3 9318.87  387.86
  -1   0  -3 9524.95  347.67
  -2   0  -3  878.71   51.89
   2   0   3  890.81   85.29
   2   0   3  794.62   56.49
   3   0   3   19.60   18.70
   4   0   3 1193.78   85.99
   4   0   3 1042.90  119.19
  -4   0  -3 1322.67   54.09
   5   0   3    1.70    6.50
   5   0   3  -31.70   23.80
  -6   0  -3  706.33   30.70
  -6   0  -3  674.23   31.80
  -6   0  -3  690.43   29.00
   6   0   3  621.54   69.89
  -6   0  -3  665.43   33.30
  -6   0  -3  703.93   33.10
  -6   0  -3  688.33   30.50
   6   0   3  552.84   98.79
  -6   0  -3  650.63   30.00
  -6   0  -3  733.33   32.60
  -6   0  -3  719.03   33.20
   7   0   3   14.00   20.00
  -7   0  -3   14.30    4.80
  -7   0  -3   15.40    4.80
  -7   0  -3   15.60    5.20
  -7   0  -3   10.40    3.30
  -7   0  -3   11.60    3.50
  -7   0  -3   12.00    4.50
  -7   0  -3   11.80    4.10
  -7   0  -3   12.90    5.10
  -7   0  -3   17.10    5.20
  -7   0  -3   11.10    4.50
  -7   0  -3   18.60    4.60
  -7   0  -3   19.90    5.50
  -8   0  -3  269.47   16.90
  -8   0  -3  292.97   22.30
  -8   0  -3  261.07   18.00
  -8   0  -3  249.68   19.00
  -8   0  -3  283.97   18.70
  -8   0  -3  279.17   19.20
  -8   0  -3  246.98   16.50
  -8   0  -3  265.77   16.10
  -8   0  -3  275.47   17.20
  -8   0  -3  263.97   18.50
  -8   0  -3  271.17   17.60
  -8   0  -3  271.17   15.70
  -9   0  -3   39.60    6.00
  -9   0  -3   37.70    5.40
  -9   0  -3   39.60    6.20
  -9   0  -3   40.60    5.50
  -9   0  -3   36.80    6.30
  -9   0  -3   34.70    7.20
  -9   0  -3   43.70    6.40
  -9   0  -3   39.30    5.30
  -9   0  -3   38.10    5.60
  -9   0  -3   33.40    8.00
  -9   0  -3   36.50    5.30
 -10   0  -3  140.49    9.50
 -10   0  -3  125.19   10.80
 -10   0  -3  150.88   14.90
 -10   0  -3  105.19    8.90
 -10   0  -3  123.69   10.70
 -10   0  -3  124.59   13.00
 -10   0  -3  115.39    9.40
 -10   0  -3  127.49   10.50
 -11   0  -3   71.69    6.70
 -11   0  -3   63.29    6.40
 -11   0  -3   78.79    5.70
 -11   0  -3   75.69    6.70
 -11   0  -3   52.99    5.80
 -12  -1   3    5.80    2.10
 -12  -1   3    3.90    1.70
 -12  -1   3    7.40    1.50
 -12   1   3    3.40    2.30
 -12   1   3    9.50    3.30
 -11  -1   3   11.90    3.50
 -11  -1   3   12.70    3.00
 -11  -1   3   15.20    3.70
 -11  -1   3    8.80    3.20
 -11  -1   3   21.60    4.00
 -11  -1   3   12.00    2.90
 -11  -1   3   14.40    2.90
 -11  -1   3   12.80    3.00
 -11  -1   3    7.80    3.30
 -11   1   3   11.40    2.40
 -11   1   3   17.60    5.20
 -11   1   3   14.50    4.70
 -11   1   3   11.20    2.50
 -11   1   3   21.20    5.70
 -11   1   3   11.30    2.70
 -11   1   3   12.70    3.40
 -11   1   3    8.20    2.10
 -11   1   3   17.40    4.30
 -10  -1   3  110.29    8.00
 -10  -1   3  106.29   10.50
 -10  -1   3  111.19   10.10
 -10  -1   3  105.99    9.40
 -10  -1   3  114.09    9.20
 -10  -1   3  102.39    8.00
 -10  -1   3  113.09    8.80
 -10  -1   3  106.19    7.60
 -10  -1   3  112.09    9.20
 -10  -1   3  109.79   10.30
 -10  -1   3  110.29    8.90
 -10   1   3  157.28   14.20
 -10   1   3  108.19    9.30
 -10   1   3  104.59   11.30
 -10   1   3  112.39    9.70
 -10   1   3  107.79    9.50
 -10   1   3  103.39    8.50
 -10   1   3  112.99   10.20
 -10   1   3  103.79   10.00
 -10   1   3  108.29   10.20
 -10   1   3  105.39    7.60
 -10   1   3  101.89    7.70
 -10   1   3  109.79    8.00
  -9  -1   3   28.80    5.40
  -9  -1   3   29.10    5.30
  -9  -1   3   29.60    5.40
  -9  -1   3   27.70    3.80
  -9  -1   3   29.90    5.20
  -9  -1   3   35.70    6.50
  -9  -1   3   29.10    7.10
  -9  -1   3   29.90    6.20
  -9  -1   3   27.50    6.20
  -9  -1   3   32.50    4.50
  -9  -1   3   27.50    5.50
  -9  -1   3   29.00    5.40
  -9  -1   3   26.40    4.60
  -9  -1   3    7.00    9.40
  -9   1   3   36.20    5.40
  -9   1   3   35.80    5.70
  -9   1   3   31.60    6.40
  -9   1   3   35.00   21.50
  -9   1   3   20.50    5.10
  -9   1   3   30.10    5.40
  -9   1   3   38.10   11.00
  -9   1   3   22.90    4.20
  -9   1   3   25.80    5.80
  -9   1   3   24.70    5.50
  -9   1   3   26.60    4.70
  -9   1   3   24.80    5.90
  -9   1   3   28.60    3.80
  -9   1   3   43.10   12.50
  -9   1   3   30.00    3.80
  -9   1   3   39.30    8.40
  -9   1   3   28.00    5.70
  -9   1   3   53.19   16.40
  -8  -1   3  463.85   24.50
   8  -1  -3  362.76  151.08
  -8  -1   3  371.86   25.50
  -8  -1   3  396.36   22.30
  -8  -1   3  388.16   30.40
  -8  -1   3  437.86   23.60
  -8  -1   3  396.36   23.00
  -8  -1   3  418.36   21.00
  -8  -1   3  427.16   22.80
  -8  -1   3  424.16   19.50
  -8  -1   3  420.86   21.70
  -8  -1   3  404.96   20.90
  -8  -1   3  431.06   23.70
   8  -1  -3  647.84   90.09
  -8  -1   3  392.56   19.60
  -8  -1   3  397.16   20.70
  -8  -1   3  405.06   21.00
  -8  -1   3  425.66   20.60
  -8   1   3  429.16   20.40
  -8   1   3  436.86   22.60
  -8   1   3  452.15   38.40
  -8   1   3  410.76   20.80
  -8   1   3  443.96   24.10
  -8   1   3  419.96   29.40
  -8   1   3  430.26   22.00
  -8   1   3  402.86   26.80
  -8   1   3  418.26   19.60
  -8   1   3  425.06   22.20
  -8   1   3  420.16   29.90
  -8   1   3  435.66   19.60
  -8   1   3  423.76   21.90
  -8   1   3  441.56   23.10
  -8   1   3  427.26   23.10
   8   1  -3  618.64   82.49
  -8   1   3  432.66   22.20
  -8   1   3  421.26   21.90
  -8   1   3  417.76   23.10
  -7  -1   3   15.40    3.90
  -7  -1   3   16.20    3.80
  -7  -1   3    9.40    4.10
  -7  -1   3   12.10    3.10
   7  -1  -3   36.40   33.80
  -7  -1   3   -4.70   10.20
  -7  -1   3   13.90    3.80
  -7  -1   3    7.60    6.70
  -7  -1   3   16.90    7.40
  -7  -1   3   10.70    2.70
  -7  -1   3   13.40    2.80
   7  -1  -3   21.40   51.39
  -7  -1   3   12.80    6.20
  -7  -1   3   11.40    3.40
  -7  -1   3   11.30    2.80
  -7  -1   3   12.70    3.30
  -7  -1   3   10.90    2.70
  -7  -1   3   15.90    4.30
  -7  -1   3    4.00   14.60
  -7   1   3   16.60    4.10
  -7   1   3    7.00    3.10
  -7   1   3   14.30    5.70
  -7   1   3    9.50    3.10
  -7   1   3   15.00    3.60
  -7   1   3   13.70    4.00
  -7   1   3   12.40    3.90
  -7   1   3   10.80   10.80
  -7   1   3   18.30    4.20
  -7   1   3   17.80    4.10
   7   1  -3   19.00   23.40
  -7   1   3   15.40    3.00
  -7   1   3    9.10    3.00
  -7   1   3   12.40    3.60
  -7   1   3   16.40    3.20
   7   1  -3   72.69   59.79
  -7   1   3   10.20    9.60
  -7   1   3   15.40    4.10
   6  -1  -3  101.19   40.10
   6  -1  -3  214.38   75.99
   6   1  -3  102.89   35.40
   6   1  -3  114.59   44.00
   5  -1  -3 1086.59  109.89
   5  -1  -3  972.80  135.59
   5   1  -3 1120.79  103.29
   5   1  -3  984.60  136.39
   4  -1  -3 1084.79   50.29
   4   1  -3 1113.39   98.29
   4   1  -3 1173.38  131.69
   3  -1  -3 1457.05   63.09
   3   1  -3 1417.16  105.79
   3   1  -3 1503.95  139.59
  -2  -1   3 1139.79   47.50
  -2  -1   3 1246.68   53.09
   2  -1  -3 1286.87   55.99
   2   1  -3 1198.48  101.99
   2   1  -3 1110.59  112.99
  -2   1   3 1198.98   45.50
   1  -1  -3  627.34   35.30
  -1  -1   3  628.24   32.70
  -1   1   3  619.64   29.10
   1   1  -3  617.54   69.99
   1   1  -3  630.24   54.49
   0  -1   3 4539.95  167.78
   0  -1  -3 4497.45  170.68
   0  -1  -3 4387.36  196.38
   0   1   3 4314.97  211.28
   0   1  -3 4656.23  213.48
   0   1  -3 4372.76  185.58
   0   1   3 4446.96  169.28
   1  -1   3 1572.74   75.09
   1  -1   3 1765.12   98.39
  -1  -1  -3 1550.94   73.19
  -1  -1  -3 1430.76   87.79
  -1   1  -3 1626.34   69.89
  -1   1  -3 1532.95   71.49
  -1   1  -3 1498.65   79.39
   1   1   3 1282.67  107.89
   2  -1   3 2021.40   98.59
   2  -1   3 2015.00  123.49
  -2  -1  -3 2094.89  117.89
   2   1   3 1686.93  141.49
   3  -1   3  902.01   64.69
   3  -1   3  934.01   87.19
  -3  -1  -3  889.71   81.09
  -3  -1  -3 1045.70   47.70
   3   1   3  731.93   95.79
   3   1   3  949.71   60.39
  -4  -1  -3  169.58   15.60
   4  -1   3  185.28   28.60
   4  -1   3  165.58   36.60
   4   1   3   77.99   41.20
   4   1   3  131.09   24.00
  -4   1  -3  155.68   13.70
   5  -1   3 1278.17  129.29
  -5  -1  -3 1414.56   56.19
   5   1   3 1129.89  145.99
  -6  -1  -3  342.07   19.70
  -6  -1  -3  336.87   19.80
   6  -1   3  302.57   84.39
   6  -1   3  262.17   41.70
  -6  -1  -3  348.67   19.80
  -6  -1  -3  349.87   19.90
  -6  -1  -3  396.16   24.50
  -6  -1  -3  333.17   17.80
  -6  -1  -3  345.57   22.00
  -6  -1  -3  335.97   17.40
  -6  -1  -3  327.87   16.80
  -6  -1  -3  320.97   17.50
  -6  -1  -3  326.27   21.90
  -6   1  -3  338.17   20.40
  -6   1  -3  349.17   20.00
  -6   1  -3  325.87   19.60
  -6   1  -3  316.47   16.80
  -6   1  -3  323.07   16.50
  -6   1  -3  332.37   18.30
  -6   1  -3  333.17   20.10
  -6   1  -3  352.06   22.90
  -6   1  -3  336.97   18.30
  -6   1  -3  317.27   18.90
   6   1   3  346.97  114.09
  -6   1  -3  325.07   19.50
  -6   1  -3  347.17   24.30
  -7  -1  -3   56.29    6.30
   7  -1   3   67.59   22.50
  -7  -1  -3   57.39    6.40
  -7  -1  -3   51.89    7.30
  -7  -1  -3   63.49    9.00
  -7  -1  -3   59.09    6.60
  -7  -1  -3   58.69    7.60
  -7  -1  -3   57.09    7.60
  -7  -1  -3   68.49    7.80
  -7  -1  -3   66.39    7.20
  -7  -1  -3   64.19    8.30
  -7  -1  -3   56.39    7.10
  -7  -1  -3   52.79    7.50
   7   1   3   33.90   30.70
  -7   1  -3   62.79    6.40
  -7   1  -3   52.79    7.80
  -7   1  -3   59.59    7.10
  -7   1  -3   57.79    7.90
  -7   1  -3   60.19    6.40
  -7   1  -3   47.00    6.70
  -7   1  -3   65.19    8.00
  -7   1  -3   65.89    9.80
  -7   1  -3   47.50    9.80
  -7   1  -3   54.59    7.50
  -7   1  -3   68.09    9.10
  -7   1  -3   62.09    8.00
  -7   1  -3   48.60    7.70
   7   1   3   46.10   52.39
  -7   1  -3   60.79   11.00
  -8  -1  -3  109.09   10.60
  -8  -1  -3  131.39   14.00
  -8  -1  -3  113.99    9.60
  -8  -1  -3  125.79   10.00
  -8  -1  -3  119.99   10.90
  -8  -1  -3  103.19    9.70
  -8  -1  -3  114.69   10.20
  -8  -1  -3  122.09   12.30
  -8  -1  -3  118.39   11.60
  -8  -1  -3  118.09   11.50
  -8  -1  -3  128.19   10.50
  -8  -1  -3  122.89   11.50
  -8   1  -3  129.89   10.80
  -8   1  -3  124.39    9.60
  -8   1  -3  110.19   11.80
  -8   1  -3  126.29   12.10
  -8   1  -3  114.79    9.90
  -8   1  -3  111.79   13.20
  -8   1  -3  114.69   11.20
  -8   1  -3  123.09   11.80
  -8   1  -3  123.49   11.00
  -8   1  -3  125.19   11.80
  -8   1  -3  123.39   13.70
  -8   1  -3  130.99   11.20
  -9  -1  -3   73.89    8.60
  -9  -1  -3   65.59    6.90
  -9  -1  -3   57.89    6.50
  -9  -1  -3   54.19    9.50
  -9  -1  -3   66.89   10.10
  -9  -1  -3   71.89    8.20
  -9  -1  -3   60.69    6.90
  -9  -1  -3   65.39    8.20
  -9  -1  -3   66.09    7.20
  -9  -1  -3   60.09    9.50
  -9  -1  -3   64.69    7.40
  -9   1  -3   71.89    7.20
  -9   1  -3   70.19    9.00
  -9   1  -3   62.99    7.10
  -9   1  -3   65.49    8.00
  -9   1  -3   66.49    8.30
  -9   1  -3   67.99    8.10
  -9   1  -3   64.89    7.30
  -9   1  -3   50.09    7.10
  -9   1  -3   67.79    8.50
  -9   1  -3   61.49    9.60
 -10  -1  -3  428.16   21.40
 -10  -1  -3  438.16   22.00
 -10  -1  -3  444.06   24.40
 -10  -1  -3  446.86   21.60
 -10  -1  -3  463.75   27.00
 -10  -1  -3  443.26   23.40
 -10  -1  -3  441.26   23.30
 -10  -1  -3  439.76   20.90
 -10   1  -3  384.26   20.50
 -10   1  -3  407.26   22.20
 -10   1  -3  463.15   24.10
 -10   1  -3  452.35   22.00
 -10   1  -3  440.76   22.40
 -10   1  -3  461.75   23.30
 -10   1  -3  418.96   26.30
 -10   1  -3  461.55   22.90
 -10   1  -3  428.76   23.60
 -11  -1  -3   53.49    6.10
 -11  -1  -3   52.39    4.50
 -11  -1  -3   52.59    6.70
 -11  -1  -3   48.30    5.10
 -11  -1  -3   52.99    5.50
 -11   1  -3   65.49    6.90
 -11   1  -3   43.40    4.60
 -11   1  -3   44.80    5.40
 -11   1  -3   43.20    5.90
 -11   1  -3   54.19    5.70
 -12  -2   3  137.99    9.90
 -12  -2   3  183.98    9.00
 -11  -2   3   28.60    3.60
 -11  -2   3   23.60    4.50
 -11  -2   3   30.10    3.60
 -11  -2   3   37.60    4.90
 -11  -2   3   24.40    3.70
 -11  -2   3   24.60    4.40
 -11  -2   3   29.60    3.30
 -11  -2   3   29.10    3.90
 -11   2   3   33.00    6.60
 -11   2   3   27.00    4.40
 -11   2   3   26.30    3.10
 -11   2   3   25.80    4.80
 -11   2   3   28.60    3.60
 -11   2   3   28.60    3.30
 -11   2   3   26.60    3.10
 -11   2   3   24.00    5.30
 -10  -2   3   85.39    7.80
 -10  -2   3   75.39    9.50
 -10  -2   3   78.89    6.90
 -10  -2   3   81.89    6.30
 -10  -2   3   85.69    7.60
 -10  -2   3   77.09    8.60
 -10  -2   3   76.79    7.20
 -10  -2   3   65.19    7.60
 -10  -2   3   76.89    6.60
 -10  -2   3   83.39    7.80
 -10   2   3   82.59    6.40
 -10   2   3   78.09    8.80
 -10   2   3   89.39    8.40
 -10   2   3   78.19    6.40
 -10   2   3   81.29    6.20
 -10   2   3   99.09   10.20
 -10   2   3   72.09    8.00
 -10   2   3   85.49    8.90
 -10   2   3   74.89   10.70
 -10   2   3   79.59    8.20
 -10   2   3   80.69    8.50
 -10   2   3   83.79    7.20
 -10   2   3  118.49   13.10
 -10   2   3   88.89   13.10
  -9  -2   3  280.67   17.20
  -9  -2   3  273.07   17.80
  -9  -2   3  242.78   17.10
  -9  -2   3  271.37   13.90
  -9  -2   3  259.87   15.70
  -9  -2   3  256.17   14.90
  -9  -2   3  254.77   15.30
  -9  -2   3  251.17   14.60
  -9  -2   3  269.77   15.80
  -9  -2   3  253.97   17.00
  -9  -2   3  253.67   15.40
  -9  -2   3  267.87   14.60
  -9   2   3  325.87   35.60
  -9   2   3  285.57   26.60
  -9   2   3  264.87   13.90
  -9   2   3  262.97   15.10
  -9   2   3  252.27   15.90
  -9   2   3  271.87   17.40
  -9   2   3  250.27   16.90
  -9   2   3  250.47   14.20
  -9   2   3  257.17   17.30
  -9   2   3  243.88   22.00
  -9   2   3  281.17   16.90
  -9   2   3  258.67   22.70
  -9   2   3  246.78   13.60
  -9   2   3  285.67   18.20
  -9   2   3  248.28   16.50
  -9   2   3  262.67   16.50
  -9   2   3  252.77   16.70
  -8  -2   3  503.15   25.30
  -8  -2   3  498.95   24.10
  -8  -2   3  433.16   23.80
   8  -2  -3  678.13  127.59
  -8  -2   3  444.36   22.70
  -8  -2   3  521.15   31.60
  -8  -2   3  424.26   29.70
  -8  -2   3  515.65   26.30
  -8  -2   3  501.95   23.30
  -8   2   3  558.64   30.30
  -8   2   3  534.85   33.70
  -8   2   3  487.95   32.10
  -8   2   3  498.85   26.40
  -8   2   3  496.55   25.60
  -8   2   3  494.25   35.40
  -8   2   3  479.75   23.00
  -8   2   3  482.55   24.90
  -8   2   3  499.15   32.60
  -8   2   3  435.76   28.30
  -8   2   3  505.15   26.10
  -8   2   3  579.14   50.59
  -8   2   3  486.75   26.00
   8   2  -3  433.86  156.58
   8   2  -3  477.25   83.59
  -8   2   3  462.75   21.70
  -8   2   3  475.95   24.70
  -7  -2   3   95.49    7.70
  -7  -2   3  111.59    8.30
  -7  -2   3  111.59    8.90
  -7  -2   3  110.89    9.10
  -7  -2   3  124.99   10.40
   7  -2  -3  161.18   57.69
  -7  -2   3  119.89   11.00
  -7  -2   3  104.89    7.30
  -7  -2   3  107.39    8.30
  -7  -2   3  113.79   10.20
  -7  -2   3  122.09   10.10
  -7  -2   3  108.79   12.60
  -7  -2   3  116.89   12.50
  -7  -2   3  103.09   10.00
  -7   2   3  116.59   10.00
  -7   2   3  117.79   10.10
   7   2  -3  104.09   31.20
  -7   2   3  122.99   10.50
  -7   2   3  102.19    7.70
  -7   2   3   91.39   12.60
  -7   2   3  117.59   14.90
  -7   2   3  110.49    9.00
  -7   2   3  100.09    8.20
  -7   2   3  118.69    9.40
  -7   2   3  127.19    7.80
   7   2  -3   78.49   54.69
  -7   2   3  117.19    9.20
  -7   2   3  103.49   12.40
  -7   2   3  106.99    9.50
  -7   2   3  108.79    9.20
  -7   2   3  122.09   13.70
  -7   2   3  112.59    9.40
  -7   2   3  106.99   16.10
   6  -2  -3  263.77   97.19
   6  -2  -3  307.17   60.69
   6   2  -3  268.67   50.49
   6   2  -3  234.88   78.29
  -5  -2   3   62.39    6.90
   5  -2  -3   79.19   12.40
   5   2  -3   98.89   31.80
   5   2  -3   34.80   29.30
   4  -2  -3  118.19   15.10
  -4  -2   3  105.39    8.70
   4   2  -3  152.18   58.99
   4   2  -3   62.39   22.60
   3  -2  -3  227.48   20.90
  -3  -2   3  192.88   17.50
   3   2  -3  227.88   37.30
   3   2  -3  299.17   82.79
   2  -2  -3  807.12   47.30
  -2  -2   3  864.41   43.90
  -2  -2   3  930.21   40.00
   2   2  -3  841.92   95.99
  -1  -2   3 2429.46  101.59
   1  -2  -3 2567.24  108.59
   1   2  -3 2346.07  157.08
  -1   2   3 2764.22  106.39
   1   2  -3 2654.63  133.09
   0  -2   3 4321.77  161.88
   0  -2  -3 4189.48  166.08
   0   2  -3 4341.37  204.48
   0   2  -3 3994.20  178.08
   0   2   3 4359.06  218.78
  -1  -2  -3 4362.16  177.88
   1  -2   3 4515.45  175.78
   1   2   3 4357.46  244.38
  -1   2  -3 4548.94  176.68
  -1   2  -3 4620.44  177.68
   2  -2   3  156.58   19.70
   2  -2   3  130.89   22.60
  -2  -2  -3  122.69   16.90
   2   2   3  126.79   45.60
  -2   2  -3  122.79   14.30
   2   2   3  122.39   23.30
   3  -2   3  422.06   46.40
  -3  -2  -3  384.16   23.10
   3  -2   3  415.26   39.30
   3   2   3  319.87   66.09
   3   2   3  442.76   45.60
   4  -2   3  412.86   50.29
   4  -2   3  350.96   39.50
  -4  -2  -3  320.27   21.40
  -4   2  -3  331.87   20.40
   4   2   3  323.77   44.20
   4   2   3  310.47   69.99
   5  -2   3  415.66   47.00
  -5  -2  -3  330.07   23.00
   5  -2   3  380.76   58.29
   5   2   3  472.75   50.89
   5   2   3  337.37   87.89
  -6  -2  -3  251.57   14.40
  -6  -2  -3  253.77   14.30
  -6  -2  -3  282.17   18.50
  -6  -2  -3  250.87   14.10
  -6  -2  -3  243.98   14.00
   6  -2   3  193.88   35.10
  -6  -2  -3  242.88   16.00
  -6  -2  -3  258.87   15.30
  -6  -2  -3  244.58   15.90
  -6  -2  -3  232.28   15.50
  -6  -2  -3  245.08   17.90
  -6  -2  -3  239.18   14.00
  -6   2  -3  254.47   15.60
  -6   2  -3  241.88   19.20
  -6   2  -3  265.57   20.90
  -6   2  -3  259.87   14.70
  -6   2  -3  249.97   16.40
  -6   2  -3  262.37   17.90
  -6   2  -3  260.67   17.20
  -6   2  -3  240.28   14.20
  -6   2  -3  243.48   15.50
  -6   2  -3  242.28   16.40
  -6   2  -3  273.67   17.40
   6   2   3  238.78   79.69
  -6   2  -3  241.88   16.70
  -6   2  -3  266.67   14.00
  -6   2  -3  257.47   17.70
  -7  -2  -3   17.70    4.50
  -7  -2  -3   11.10    3.50
  -7  -2  -3   13.80    4.90
  -7  -2  -3    7.80    3.10
  -7  -2  -3   14.90    4.40
  -7  -2  -3   14.90    4.60
  -7  -2  -3    7.20    3.80
   7  -2   3   29.20   23.80
  -7  -2  -3    7.90    2.70
  -7  -2  -3    6.50    5.30
  -7  -2  -3   11.00    3.20
  -7  -2  -3   14.90    4.30
  -7   2  -3   13.40    5.00
  -7   2  -3   18.40    4.90
  -7   2  -3   13.10    4.30
  -7   2  -3   18.00    4.20
  -7   2  -3    9.90    3.70
  -7   2  -3    7.00    5.00
  -7   2  -3    9.60    3.40
  -7   2  -3   12.00    6.20
  -7   2  -3   14.80    4.40
  -7   2  -3   18.90    7.20
  -7   2  -3   26.20    7.90
  -7   2  -3   11.40    4.20
  -7   2  -3   11.80    4.10
   7   2   3   20.50   17.80
  -7   2  -3   18.40    5.30
  -8  -2  -3  400.06   21.40
  -8  -2  -3  440.76   27.60
  -8  -2  -3  412.46   24.20
  -8  -2  -3  403.36   24.10
  -8  -2  -3  391.96   22.70
  -8  -2  -3  423.96   21.20
  -8  -2  -3  412.36   21.20
  -8  -2  -3  431.16   23.80
  -8  -2  -3  422.16   22.00
  -8  -2  -3  411.66   23.80
  -8   2  -3  424.56   25.60
  -8   2  -3  358.66   20.80
  -8   2  -3  418.06   22.90
  -8   2  -3  406.86   20.70
  -8   2  -3  423.06   25.30
  -8   2  -3  432.66   22.10
  -8   2  -3  405.66   24.00
  -8   2  -3  428.66   30.10
  -8   2  -3  404.36   23.30
  -8   2  -3  414.06   24.10
  -8   2  -3  431.86   25.10
  -8   2  -3  414.06   26.50
  -8   2  -3  405.86   23.30
  -8   2  -3  431.16   28.80
  -9  -2  -3  344.67   20.40
  -9  -2  -3  344.27   17.90
  -9  -2  -3  314.97   17.80
  -9  -2  -3  279.87   17.40
  -9  -2  -3  339.27   17.80
  -9  -2  -3  353.06   23.80
  -9  -2  -3  296.57   19.70
  -9  -2  -3  324.57   19.20
  -9  -2  -3  309.27   18.50
  -9   2  -3  311.37   20.40
  -9   2  -3  313.57   23.80
  -9   2  -3  325.17   19.10
  -9   2  -3  345.47   18.70
  -9   2  -3  330.57   20.20
  -9   2  -3  330.67   20.00
  -9   2  -3  346.27   21.80
  -9   2  -3  319.07   21.00
  -9   2  -3  301.77   19.60
  -9   2  -3  318.37   18.80
 -10  -2  -3  182.98   11.80
 -10  -2  -3  226.48   17.00
 -10  -2  -3  193.78   11.60
 -10  -2  -3  199.98   13.70
 -10  -2  -3  185.08   11.90
 -10  -2  -3  178.18   11.80
 -10  -2  -3  216.58   14.00
 -10  -2  -3  198.58   12.40
 -10   2  -3  176.78   19.20
 -10   2  -3  204.18   14.40
 -10   2  -3  227.88   15.10
 -10   2  -3  212.38   12.50
 -10   2  -3  195.28   13.90
 -10   2  -3  202.48   13.10
 -10   2  -3  197.18   13.30
 -10   2  -3  211.98   14.20
 -11  -2  -3   20.20    5.00
 -11  -2  -3   27.60    5.40
 -11  -2  -3   33.50    3.30
 -11  -2  -3   24.40    3.10
 -11  -2  -3   33.90    4.00
 -11   2  -3   33.10    5.20
 -11   2  -3   38.20    5.60
 -11   2  -3   29.20    5.00
 -11   2  -3   35.30    5.00
 -11   2  -3   23.20    4.20
 -12  -3   3   15.80    2.70
 -12  -3   3   20.60    2.20
 -12  -3   3   13.80    2.80
 -12  -3   3   18.90    2.50
 -11  -3   3  348.77   17.70
 -11  -3   3  375.76   19.10
 -11  -3   3  300.07   15.70
 -11  -3   3  342.67   14.60
 -11  -3   3  347.47   16.70
 -11  -3   3  290.47   15.40
 -11  -3   3  347.27   15.50
 -11  -3   3  380.76   16.20
 -11   3   3  283.97   17.30
 -11   3   3  308.37   14.60
 -11   3   3  386.96   18.30
 -11   3   3  351.96   18.20
 -11   3   3  334.27   14.90
 -11   3   3  329.47   14.00
 -11   3   3  305.87   16.90
 -11   3   3  347.47   17.80
 -10  -3   3   38.80    5.30
 -10  -3   3   38.20    4.80
 -10  -3   3   33.00    3.80
 -10  -3   3   37.60    4.50
 -10  -3   3   33.60    4.70
 -10  -3   3   37.20    4.70
 -10  -3   3   37.40    4.60
 -10  -3   3   38.00    5.80
 -10  -3   3   36.20    5.30
 -10   3   3   37.40    8.20
 -10   3   3   48.80   10.90
 -10   3   3   66.69    9.50
 -10   3   3   36.20    4.10
 -10   3   3   43.40    6.20
 -10   3   3   36.70    5.60
 -10   3   3   35.80    5.60
 -10   3   3   35.60    5.40
 -10   3   3   40.00    6.60
 -10   3   3   50.79    9.20
 -10   3   3   35.30    3.90
 -10   3   3   35.50    4.50
 -10   3   3   40.80    4.20
  -9  -3   3  347.17   17.50
  -9  -3   3  333.57   18.20
  -9  -3   3  297.77   17.10
  -9  -3   3  328.87   19.10
  -9  -3   3  306.67   15.50
  -9  -3   3  317.87   20.00
  -9  -3   3  322.57   19.80
  -9  -3   3  323.47   16.80
  -9  -3   3  309.97   17.60
  -9  -3   3  329.77   17.70
  -9   3   3  348.47   28.00
  -9   3   3  344.97   34.60
  -9   3   3  338.87   20.30
  -9   3   3  321.77   17.00
  -9   3   3  329.37   19.70
  -9   3   3  325.97   16.00
  -9   3   3  320.27   16.20
  -9   3   3  341.67   20.90
  -9   3   3  300.77   15.30
  -9   3   3  318.67   24.80
  -9   3   3  337.57   19.90
  -9   3   3  324.07   19.10
  -9   3   3  327.07   25.60
  -9   3   3  247.28   21.90
  -9   3   3  307.67   18.70
  -9   3   3  334.17   18.60
  -9   3   3  316.07   18.40
  -8  -3   3  814.32   35.30
   8  -3  -3 1036.10  122.99
  -8  -3   3  779.82   34.50
  -8  -3   3  792.62   33.20
  -8  -3   3  837.42   38.00
  -8  -3   3  803.62   32.40
  -8  -3   3  807.12   34.20
  -8  -3   3  771.12   36.70
  -8  -3   3  756.72   33.80
  -8  -3   3  734.63   33.50
  -8  -3   3  828.12   36.30
  -8  -3   3  819.72   37.80
  -8   3   3  804.82   36.90
  -8   3   3  786.52   36.20
  -8   3   3  780.52   43.10
  -8   3   3  852.71   37.40
  -8   3   3  804.62   37.50
  -8   3   3  799.52   50.69
   8   3  -3  928.81   99.89
  -8   3   3  835.72   37.40
  -8   3   3  775.62   33.60
  -8   3   3  849.72   44.20
  -8   3   3  797.32   33.00
  -8   3   3  812.52   36.60
  -8   3   3  703.23   42.60
   8   3  -3  669.73  159.58
  -8   3   3  787.72   35.50
  -8   3   3  831.82   32.80
  -8   3   3  850.31   42.90
  -8   3   3  786.52   40.40
  -8   3   3  820.72   35.40
  -7  -3   3  116.19    8.20
  -7  -3   3  109.89    9.10
  -7  -3   3  120.49    7.50
  -7  -3   3  112.69    8.40
  -7  -3   3   81.09   11.00
  -7  -3   3  113.89    8.60
  -7  -3   3  112.79    9.80
  -7  -3   3  117.89   10.30
  -7  -3   3  115.59    8.40
  -7  -3   3  105.19    9.10
  -7  -3   3  104.89    7.90
   7  -3  -3  164.18   52.89
  -7  -3   3  118.89   10.70
  -7   3   3  121.59   10.40
  -7   3   3  107.49    7.90
  -7   3   3  108.39    8.40
  -7   3   3  122.39   16.40
  -7   3   3  100.19   13.90
  -7   3   3  126.69   13.40
  -7   3   3  115.19    9.70
  -7   3   3  100.79    8.90
   7   3  -3  103.79   79.99
  -7   3   3  114.79   14.30
  -7   3   3  112.69    7.50
  -7   3   3  109.49    7.90
  -7   3   3  111.99   10.00
   7   3  -3  141.19   35.30
  -7   3   3  110.19    9.40
  -7   3   3  109.39    9.90
  -7   3   3  112.69    8.90
  -7   3   3  120.49   10.50
  -7   3   3  117.89   14.30
   7   3  -3  138.69   75.69
  -7   3   3   90.59   12.40
  -6  -3   3  503.35   23.80
  -6  -3   3  504.85   22.20
  -6  -3   3  489.15   24.80
   6  -3  -3  546.35   41.60
   6  -3  -3  533.95  111.19
  -6  -3   3  505.25   22.00
  -6  -3   3  477.95   22.20
  -6  -3   3  515.15   22.70
  -6  -3   3  485.45   23.20
  -6  -3   3  500.85   25.80
   6   3  -3  727.53  116.39
   6   3  -3  522.75   66.29
  -6   3   3  524.25   23.70
  -6   3   3  543.75   29.70
  -6   3   3  533.75   29.20
  -6   3   3  490.85   23.80
  -6   3   3  558.94   34.40
  -6   3   3  524.25   28.80
  -6   3   3  512.45   25.50
  -6   3   3  530.25   25.70
  -5  -3   3  316.07   17.80
   5  -3  -3  342.27   32.00
   5   3  -3  346.37   53.39
   5   3  -3  328.17   85.99
   4  -3  -3   84.99   18.20
  -4  -3   3   65.59    7.40
   4   3  -3   76.49   32.20
   4   3  -3  111.69   44.00
   3  -3  -3 1177.68   64.29
  -3  -3   3 1150.38   57.19
   3   3  -3 1030.30   87.59
   3   3  -3 1111.39  125.69
  -2  -3   3  152.68   16.30
   2  -3  -3  169.38   20.40
  -2  -3   3  187.18   15.70
   2   3  -3  190.58   31.50
   2   3  -3  143.09   45.20
  -1  -3   3 2534.05  104.29
   1  -3  -3 2335.37  111.09
  -1   3   3 2503.25   94.19
   1   3  -3 2672.43  134.59
   1   3  -3 2344.97  158.38
  -1   3   3 2703.63  150.18
   0  -3   3 2978.60  122.69
   0   3   3 3045.80  183.68
   0   3  -3 3110.99  142.09
   0   3  -3 2992.60  163.68
  -1  -3  -3 1019.60   60.19
   1  -3   3 1022.80   56.19
   1   3   3  965.30  103.79
  -1   3  -3 1032.80   62.09
   1   3   3 1109.59   83.59
  -1   3  -3 1056.59   62.19
  -2  -3  -3 1857.81   95.69
  -2  -3  -3 2028.10   76.99
   2  -3   3 2091.09   96.79
  -2   3  -3 2020.70   91.89
   2   3   3 1954.00  123.99
   2   3   3 1641.34  159.28
   3  -3   3 2942.51  136.99
  -3  -3  -3 3177.08  112.29
  -3   3  -3 3049.09  114.09
   3   3   3 2804.82  164.88
   3   3   3 2596.84  226.38
  -4  -3  -3  420.76   25.10
   4   3   3  350.36   82.49
   4   3   3  368.06   54.29
   5  -3   3  429.86   46.10
   5   3   3  572.24   64.29
   5   3   3  455.45   96.69
  -6  -3  -3  511.25   23.30
  -6  -3  -3  525.55   24.70
  -6  -3  -3  485.15   27.40
  -6  -3  -3  511.05   25.90
  -6  -3  -3  492.75   23.40
  -6  -3  -3  501.15   25.40
  -6  -3  -3  446.86   27.00
  -6  -3  -3  466.75   24.80
  -6  -3  -3  485.35   25.30
   6  -3   3  518.85   54.69
  -6  -3  -3  486.45   23.00
  -6   3  -3  525.65   29.20
  -6   3  -3  500.65   26.00
  -6   3  -3  521.15   22.80
  -6   3  -3  556.84   32.00
  -6   3  -3  541.25   26.00
  -6   3  -3  437.06   23.90
  -6   3  -3  524.95   27.40
  -6   3  -3  544.45   27.40
  -6   3  -3  514.15   27.20
  -6   3  -3  495.85   31.40
  -6   3  -3  485.85   26.10
   6   3   3  327.37  115.79
  -6   3  -3  521.85   27.90
  -6   3  -3  497.15   28.00
  -6   3  -3  503.55   24.10
  -7  -3  -3   72.89   11.70
  -7  -3  -3   60.49    7.60
   7  -3   3  133.99   29.70
  -7  -3  -3   59.19    6.60
  -7  -3  -3   65.49   10.10
  -7  -3  -3   60.79    7.50
  -7  -3  -3   58.49    7.60
  -7  -3  -3   59.99    7.10
  -7  -3  -3   52.29    7.20
  -7  -3  -3   60.69    6.50
  -7  -3  -3   58.69    8.30
  -7   3  -3   51.69    7.80
  -7   3  -3   50.49    6.40
  -7   3  -3   57.29    8.60
  -7   3  -3   55.99    6.70
  -7   3  -3   61.09    8.80
  -7   3  -3   62.29   11.40
   7   3   3   29.60   49.80
  -7   3  -3   60.39    8.40
  -7   3  -3   82.99   11.80
  -7   3  -3   72.49   10.90
  -7   3  -3   62.99    9.80
  -7   3  -3   59.89    8.20
  -7   3  -3   65.79   14.60
  -8  -3  -3 1094.89   46.20
  -8  -3  -3 1002.10   44.80
  -8  -3  -3 1078.89   46.80
  -8  -3  -3 1000.70   49.60
  -8  -3  -3 1053.09   43.20
  -8  -3  -3 1011.80   46.10
  -8  -3  -3 1037.90   43.80
  -8  -3  -3 1092.19   43.40
  -8  -3  -3 1044.40   43.20
  -8  -3  -3 1058.59   45.80
  -8   3  -3 1024.80   46.40
  -8   3  -3  993.90   46.40
  -8   3  -3 1024.60   41.50
  -8   3  -3 1032.30   52.79
  -8   3  -3 1099.29   48.60
  -8   3  -3 1036.10   49.20
  -8   3  -3 1064.89   47.90
  -8   3  -3 1073.69   47.60
  -8   3  -3 1030.00   53.59
  -8   3  -3 1067.79   46.10
  -8   3  -3 1056.69   48.90
  -8   3  -3 1072.09   44.50
  -9  -3  -3  112.89    9.30
  -9  -3  -3  106.59    9.40
  -9  -3  -3  112.89   10.70
  -9  -3  -3  105.99    8.80
  -9  -3  -3   98.59    8.50
  -9  -3  -3  114.19   12.30
  -9  -3  -3  116.19    9.70
  -9  -3  -3  111.19   10.20
  -9  -3  -3  136.39    9.90
  -9   3  -3  119.89   11.10
  -9   3  -3  150.18   13.60
  -9   3  -3  112.69    9.40
  -9   3  -3  111.89   10.70
  -9   3  -3  114.79   10.30
  -9   3  -3  124.19   14.00
  -9   3  -3  129.99   11.10
  -9   3  -3  111.79   11.00
  -9   3  -3  115.99   11.90
  -9   3  -3  111.69   11.30
 -10  -3  -3   12.30    3.30
 -10  -3  -3   12.80    3.00
 -10  -3  -3   11.50    2.60
 -10  -3  -3    6.20    2.80
 -10  -3  -3   11.40    4.90
 -10  -3  -3   10.10    4.20
 -10  -3  -3   11.50    3.40
 -10   3  -3    6.90    3.10
 -10   3  -3   10.40    4.10
 -10   3  -3    8.90    3.50
 -10   3  -3    7.60    3.40
 -10   3  -3    7.40    3.10
 -10   3  -3   18.50    5.90
 -10   3  -3    8.50    3.60
 -10   3  -3    9.20    4.20
 -11  -3  -3  112.69    6.20
 -11  -3  -3  116.59    7.80
 -11  -3  -3   90.39    6.20
 -11  -3  -3   99.19    6.90
 -11  -3  -3  105.09    8.80
 -11   3  -3  103.99    8.20
 -11   3  -3  114.69    9.00
 -11   3  -3  102.59    7.70
 -11   3  -3  120.59    7.90
 -12  -4   3   24.80    3.00
 -12  -4   3   23.20    2.40
 -11  -4   3   20.10    3.40
 -11  -4   3   19.80    2.80
 -11  -4   3   18.50    3.90
 -11  -4   3   20.10    3.00
 -11  -4   3   18.10    3.20
 -11  -4   3   16.60    4.00
 -11  -4   3   17.20    3.00
 -11   4   3   25.70    4.80
 -11   4   3   15.60    2.90
 -11   4   3   18.90    3.20
 -11   4   3   17.20    3.20
 -10  -4   3  712.23   30.00
 -10  -4   3  696.03   31.00
 -10  -4   3  703.23   28.50
 -10  -4   3  789.52   33.20
 -10  -4   3  759.32   34.70
 -10  -4   3  724.63   30.90
 -10  -4   3  785.82   32.10
 -10  -4   3  717.13   30.50
 -10   4   3  700.73   38.20
 -10   4   3  769.52   33.80
 -10   4   3  731.03   29.20
 -10   4   3  796.52   51.59
 -10   4   3  761.42   33.90
 -10   4   3  677.63   28.30
 -10   4   3  714.43   29.50
 -10   4   3  691.13   32.70
 -10   4   3  745.73   32.10
 -10   4   3  712.13   31.70
  -9  -4   3   39.50    6.10
  -9  -4   3   39.10    4.70
  -9  -4   3   48.60    6.10
  -9  -4   3   35.50    8.70
  -9  -4   3   40.50    6.40
  -9  -4   3   31.80    5.40
  -9  -4   3   37.30    5.00
  -9  -4   3   36.10    5.50
  -9  -4   3   42.80    5.30
  -9   4   3   47.20    4.70
  -9   4   3   41.20    9.80
  -9   4   3   43.40    8.70
  -9   4   3   39.80   12.40
  -9   4   3   43.90    6.10
  -9   4   3   48.20   12.90
  -9   4   3   39.80    9.40
  -9   4   3   60.99   13.90
  -9   4   3   46.00    6.30
  -9   4   3   41.00    6.20
  -9   4   3   38.90    4.50
  -9   4   3   41.40    9.00
  -9   4   3   27.70   11.60
  -9   4   3   60.89   12.50
  -9   4   3   48.40    6.50
  -9   4   3   63.99   18.30
  -8  -4   3   52.89    7.70
   8  -4  -3  -73.19   68.69
  -8  -4   3   58.99    6.30
  -8  -4   3   56.19    7.30
  -8  -4   3   55.39    6.70
  -8  -4   3   50.89    5.70
  -8  -4   3   55.39    6.00
  -8  -4   3   56.79    5.20
  -8  -4   3   64.19    6.40
  -8  -4   3   54.99    6.00
  -8  -4   3   57.19    6.90
  -8   4   3   53.99    7.30
  -8   4   3   69.99   15.30
  -8   4   3   55.89    9.90
  -8   4   3   55.49    7.20
  -8   4   3   49.40    6.90
  -8   4   3   55.59    5.40
  -8   4   3   60.89   12.60
  -8   4   3   66.99   14.30
  -8   4   3   50.69    5.40
  -8   4   3   65.69   16.20
  -8   4   3   60.59   11.20
   8   4  -3  195.28  102.09
  -8   4   3   54.59   11.90
  -8   4   3   64.69    7.60
  -8   4   3   46.00    5.60
  -8   4   3   59.29    6.60
  -8   4   3   57.99    6.00
  -8   4   3   54.29    6.60
  -8   4   3   56.39   11.30
   7  -4  -3  738.53  108.39
  -7  -4   3  635.94   30.50
  -7  -4   3  656.13   31.20
  -7  -4   3  634.04   26.20
  -7  -4   3  646.04   27.70
  -7  -4   3  638.24   27.30
  -7  -4   3  605.04   27.50
  -7  -4   3  645.04   28.30
  -7  -4   3  656.63   28.20
  -7  -4   3  623.04   29.10
  -7  -4   3  643.04   29.60
   7  -4  -3  868.11  194.08
  -7   4   3  640.74   29.20
  -7   4   3  677.53   36.40
  -7   4   3  631.64   35.70
  -7   4   3  669.73   31.50
  -7   4   3  662.43   31.40
  -7   4   3  690.23   42.20
  -7   4   3  622.34   26.80
  -7   4   3  623.34   27.80
  -7   4   3  619.24   36.00
  -7   4   3  653.23   26.60
  -7   4   3  601.64   29.20
  -7   4   3  622.14   30.20
  -7   4   3  663.63   35.00
  -7   4   3  650.73   31.40
  -7   4   3  657.53   30.70
   7   4  -3  530.75   81.19
  -7   4   3  597.34   33.40
  -7   4   3  635.24   31.10
  -6  -4   3  876.41   34.90
  -6  -4   3  830.52   37.50
  -6  -4   3  890.11   36.90
   6  -4  -3  923.71   80.29
  -6  -4   3  832.92   40.40
  -6  -4   3  955.20   38.90
  -6  -4   3  914.71   39.80
  -6  -4   3  866.51   46.00
  -6  -4   3  841.52   36.30
  -6  -4   3  900.61   35.60
  -6   4   3  906.41   39.10
  -6   4   3  867.71   34.10
  -6   4   3  876.71   45.50
  -6   4   3  916.71   51.39
   6   4  -3  908.91   93.59
   6   4  -3  971.30  144.89
  -6   4   3  880.51   38.80
  -6   4   3  920.51   42.20
  -6   4   3  885.21   39.00
  -6   4   3  860.31   42.20
  -6   4   3  812.02   35.30
  -6   4   3  875.11   36.70
  -6   4   3  915.11   38.60
  -6   4   3  949.21   49.00
   5  -4  -3  377.96   37.30
  -5  -4   3  327.57   20.10
   5   4  -3  370.76   52.89
   5   4  -3  355.56  103.79
   4  -4  -3 1229.48   74.79
  -4  -4   3 1239.58   51.99
   4   4  -3 1256.57  102.59
   4   4  -3 1155.28  144.09
  -3  -4   3  461.35   24.70
  -3  -4   3  436.26   33.10
  -3  -4   3  473.15   22.70
   3  -4  -3  475.65   40.50
   3   4  -3  456.25   77.89
   3   4  -3  450.85   55.29
   2  -4  -3  194.48   23.70
  -2  -4   3  200.28   19.90
  -2  -4   3  180.38   19.20
   2   4  -3  216.78   63.79
   2   4  -3  164.18   30.00
  -2   4   3  249.18   37.50
   1  -4  -3  346.97   34.10
  -1  -4   3  371.16   28.60
  -1  -4   3  412.26   35.00
   1   4  -3  374.56   56.19
  -1   4   3  410.06   52.89
   1   4  -3  361.66   41.10
   0  -4   3 1342.77   66.79
   0   4  -3 1261.27   99.19
   0   4  -3 1328.57   83.49
   0   4   3 1380.56  119.29
  -1  -4  -3 1301.27   74.29
  -1  -4  -3 1276.37   54.39
   1  -4   3 1425.96   69.49
   1  -4   3 1300.67  102.89
  -1   4  -3 1278.37   77.19
  -1   4  -3 1404.76   62.19
   1   4   3 1032.30  117.99
  -1   4  -3 1209.88   78.39
   1   4   3 1323.57  104.19
  -2  -4  -3 1406.76   57.89
  -2  -4  -3 1338.77   78.49
   2  -4   3 1417.76   74.89
  -2   4  -3 1361.76   77.49
  -2   4  -3 1454.75   67.49
   2   4   3 1111.09  136.09
   2   4   3 1332.77  107.19
  -3  -4  -3 2877.31  110.99
   3  -4   3 3041.00  135.79
  -3  -4  -3 2921.81  137.19
   3   4   3 2942.71  180.78
  -3   4  -3 2762.32  113.39
   4  -4   3   30.10   14.00
  -4  -4  -3   14.60    5.70
   4   4   3   46.30   22.00
   4   4   3   24.50   23.70
  -5  -4  -3  935.31   38.10
  -5  -4  -3  892.51   38.00
   5  -4   3  983.10   72.39
  -5  -4  -3  960.70   38.50
  -5  -4  -3 1017.60   53.99
  -5  -4  -3  902.41   46.50
  -5  -4  -3  984.30   39.10
  -5   4  -3  943.21   47.70
  -5   4  -3 1014.60   48.30
  -5   4  -3 1000.50   41.80
   5   4   3  851.11  149.79
  -5   4  -3  926.71   42.00
   5   4   3  996.00  105.69
  -5   4  -3  953.20   44.40
  -5   4  -3  951.20   44.20
  -5   4  -3  969.50   42.60
  -5   4  -3 1019.10   43.20
  -5   4  -3  941.41   39.50
  -5   4  -3  958.80   43.10
  -5   4  -3  983.90   42.50
  -6  -4  -3   12.00    3.30
  -6  -4  -3   27.40    7.50
  -6  -4  -3   13.30    3.60
  -6  -4  -3   21.30    4.60
  -6  -4  -3   16.20    4.10
  -6  -4  -3   28.30    4.80
   6  -4   3   32.80   15.60
  -6  -4  -3   18.70    4.80
  -6  -4  -3   15.40    4.70
  -6  -4  -3   18.00    3.50
  -6   4  -3   24.00    6.90
   6   4   3  -12.20   31.60
  -6   4  -3   21.70    6.90
  -6   4  -3   18.00    5.20
  -6   4  -3   13.00    3.90
   6   4   3   15.10   11.40
  -6   4  -3   15.40    5.60
  -6   4  -3   28.30    8.40
  -6   4  -3   12.00    4.30
  -6   4  -3   17.40    5.30
  -6   4  -3   19.40    6.40
  -6   4  -3   13.80    4.80
  -6   4  -3   17.60    4.10
  -6   4  -3   17.70    4.70
  -7  -4  -3   12.00    3.50
  -7  -4  -3   17.10    4.70
  -7  -4  -3   14.40    4.90
  -7  -4  -3   11.50    3.50
   7  -4   3   34.80   21.30
  -7  -4  -3   11.60    3.60
  -7  -4  -3   12.10    4.70
  -7  -4  -3   15.80    4.10
  -7  -4  -3    9.20    4.30
  -7  -4  -3   14.10    3.90
  -7  -4  -3   15.20    4.00
   7   4   3   86.99   70.19
  -7   4  -3   26.10    5.80
  -7   4  -3   13.20    3.70
  -7   4  -3   13.20    4.90
  -7   4  -3   12.70    6.30
  -7   4  -3   13.30    5.20
  -7   4  -3   16.90    3.70
   7   4   3   -7.50   12.00
  -7   4  -3   21.10    5.20
  -7   4  -3   14.50    4.80
  -7   4  -3   19.70    7.50
  -7   4  -3   11.20    4.40
  -7   4  -3   14.20    5.50
  -7   4  -3   17.00    7.10
  -8  -4  -3  341.77   18.40
  -8  -4  -3  358.56   18.30
  -8  -4  -3  350.66   21.00
  -8  -4  -3  330.17   18.00
  -8  -4  -3  332.97   22.80
  -8  -4  -3  344.67   18.70
  -8  -4  -3  315.27   22.30
  -8  -4  -3  340.97   19.80
  -8  -4  -3  319.87   19.10
  -8   4  -3  318.27   20.60
  -8   4  -3  349.37   23.40
  -8   4  -3  368.16   23.60
  -8   4  -3  321.77   25.30
  -8   4  -3  333.17   21.70
  -8   4  -3  326.87   25.00
  -8   4  -3  376.96   23.10
  -8   4  -3  364.16   22.00
  -8   4  -3  320.87   18.80
  -8   4  -3  349.57   21.00
  -8   4  -3  309.77   21.30
  -9  -4  -3   98.89    7.90
  -9  -4  -3   83.79    7.90
  -9  -4  -3   88.99    7.80
  -9  -4  -3   89.89   10.50
  -9  -4  -3   81.09    8.30
  -9  -4  -3   90.39    7.90
  -9  -4  -3   79.99    8.60
  -9  -4  -3   78.59    7.80
  -9  -4  -3   88.39    7.50
  -9   4  -3   92.49   10.80
  -9   4  -3   88.29    9.30
  -9   4  -3   95.59    9.20
  -9   4  -3   95.59    9.90
  -9   4  -3  100.39   11.00
  -9   4  -3   89.19    8.30
  -9   4  -3  102.69   13.60
  -9   4  -3  102.89   11.50
  -9   4  -3   97.39   10.00
 -10  -4  -3  263.57   17.50
 -10  -4  -3  293.87   15.70
 -10  -4  -3  267.27   15.30
 -10  -4  -3  261.17   13.80
 -10  -4  -3  265.17   13.40
 -10  -4  -3  289.07   14.40
 -10   4  -3  258.67   16.00
 -10   4  -3  270.57   17.10
 -10   4  -3  260.47   16.30
 -10   4  -3  221.28   14.10
 -10   4  -3  272.97   14.70
 -10   4  -3  246.08   16.20
 -10   4  -3  271.67   15.70
 -11  -4  -3   17.50    2.20
 -11  -4  -3   18.70    2.60
 -11  -4  -3   17.70    3.20
 -11  -4  -3   18.70    3.00
 -11   4  -3   12.00    4.10
 -11  -5   3   29.90    3.30
 -11  -5   3   35.80    3.40
 -11  -5   3   28.70    3.50
 -11  -5   3   25.80    2.90
 -11  -5   3   35.90    4.60
 -11  -5   3   34.90    4.50
 -11   5   3   48.10    6.40
 -11   5   3   29.70    4.60
 -10  -5   3  213.78   11.30
 -10  -5   3  189.88    9.80
 -10  -5   3  192.48   11.60
 -10  -5   3  209.28   12.70
 -10  -5   3  193.68   11.80
 -10  -5   3  200.98   13.90
 -10  -5   3  197.48   11.40
 -10  -5   3  190.58   11.30
 -10   5   3  192.18   10.40
 -10   5   3  204.88   20.80
 -10   5   3  202.88   12.50
 -10   5   3  175.48   13.30
 -10   5   3  182.08   11.70
 -10   5   3  188.78   10.30
 -10   5   3  264.37   30.30
 -10   5   3  203.78   13.00
 -10   5   3  199.58   12.80
  -9  -5   3  279.67   15.30
  -9  -5   3  269.97   16.10
  -9  -5   3  266.97   17.70
  -9  -5   3  253.37   14.10
  -9  -5   3  261.67   15.00
  -9  -5   3  256.57   12.70
  -9  -5   3  275.77   15.20
  -9  -5   3  239.08   14.20
  -9   5   3  301.27   26.30
  -9   5   3  272.47   22.30
  -9   5   3  303.87   28.90
  -9   5   3  258.17   13.30
  -9   5   3  270.97   21.20
  -9   5   3  276.67   15.90
  -9   5   3  262.87   16.80
  -9   5   3  267.67   15.60
  -9   5   3  258.57   14.00
  -9   5   3  260.17   16.10
  -9   5   3  227.88   17.40
  -9   5   3  270.17   17.30
  -9   5   3  265.37   12.90
  -8  -5   3  412.76   21.90
  -8  -5   3  402.46   18.30
  -8  -5   3  413.36   20.50
  -8  -5   3  405.76   19.80
  -8  -5   3  411.46   20.30
  -8  -5   3  415.86   21.90
  -8  -5   3  409.36   20.50
  -8  -5   3  399.56   20.50
  -8  -5   3  431.06   24.00
  -8   5   3  439.86   30.90
  -8   5   3  427.96   23.40
  -8   5   3  397.56   25.00
  -8   5   3  441.76   28.70
  -8   5   3  404.86   18.80
  -8   5   3  412.16   22.70
  -8   5   3  431.46   21.80
  -8   5   3  440.56   23.70
  -8   5   3  422.36   33.50
  -8   5   3  413.06   19.90
  -8   5   3  435.46   24.70
  -8   5   3  369.96   22.80
  -8   5   3  397.86   18.80
   8   5  -3  420.46   34.40
  -8   5   3  433.96   28.80
  -8   5   3  432.16   30.60
  -8   5   3  388.26   27.00
  -8   5   3  416.86   21.90
  -7  -5   3  491.95   25.50
  -7  -5   3  447.56   24.60
  -7  -5   3  462.85   24.00
  -7  -5   3  450.75   21.30
  -7  -5   3  489.65   23.80
  -7  -5   3  445.76   21.50
  -7  -5   3  470.25   22.30
  -7  -5   3  470.45   20.30
  -7  -5   3  451.85   21.90
  -7  -5   3  475.25   22.20
  -7   5   3  468.15   26.90
  -7   5   3  488.65   25.30
  -7   5   3  487.05   26.80
  -7   5   3  464.65   30.10
  -7   5   3  449.16   21.60
  -7   5   3  501.35   30.20
  -7   5   3  432.66   28.40
  -7   5   3  510.45   35.10
  -7   5   3  476.55   21.10
   7   5  -3  261.07  125.99
  -7   5   3  469.45   25.00
  -7   5   3  460.55   23.10
   7   5  -3  450.25   37.70
  -7   5   3  472.95   25.00
  -7   5   3  456.35   29.20
  -7   5   3  496.15   25.50
  -7   5   3  467.25   20.70
  -7   5   3  480.65   31.20
  -7   5   3  460.65   23.90
   7   5  -3  592.54   76.69
  -6  -5   3 1525.55   58.29
  -6  -5   3 1513.35   55.39
  -6  -5   3 1471.75   56.49
  -6  -5   3 1508.25   58.69
  -6  -5   3 1551.24   56.79
  -6  -5   3 1565.64   61.09
  -6  -5   3 1578.94   57.79
  -6  -5   3 1407.26   61.29
   6  -5  -3 1432.56   97.59
  -6  -5   3 1463.65   58.59
  -6   5   3 1520.75   65.29
  -6   5   3 1553.54   65.49
  -6   5   3 1554.94   60.49
  -6   5   3 1786.12   62.29
  -6   5   3 1586.74   66.19
  -6   5   3 1543.95   62.09
  -6   5   3 1624.74   66.99
   6   5  -3 1462.05  124.09
  -6   5   3 1486.45   58.99
  -6   5   3 1603.44   71.99
  -6   5   3 1565.54   60.89
   6   5  -3 1271.97  178.68
   6   5  -3 1379.16   75.59
  -6   5   3 1549.94   61.59
  -6   5   3 1507.85   60.79
  -6   5   3 1472.05   64.29
  -6   5   3 1506.75   60.79
  -6   5   3 1450.95   57.19
  -6   5   3 1517.15   56.29
  -6   5   3 1573.44   59.19
  -5  -5   3   24.10    6.80
   5  -5  -3   43.30   17.40
  -5   5   3   20.80    8.70
  -5   5   3   25.40   10.10
  -5   5   3   39.50    5.80
  -5   5   3   19.00    7.90
  -5   5   3   31.20    5.90
   5   5  -3   46.70   20.60
  -5   5   3   25.70    4.40
  -5   5   3   28.50    7.30
   5   5  -3   19.20   39.50
   4  -5  -3   12.60    8.10
  -4  -5   3    0.80    2.90
   4   5  -3   16.00   17.50
   4   5  -3  -17.30   22.50
  -3  -5   3  871.61   41.10
   3  -5  -3  827.32   62.39
  -3  -5   3  863.51   45.20
   3   5  -3  950.50   84.39
   3   5  -3  847.22  113.89
  -2  -5   3  532.35   28.60
  -2  -5   3  517.95   38.80
  -2  -5   3  495.15   37.10
   2  -5  -3  561.34   48.20
   2   5  -3  520.55   57.69
   2   5  -3  535.85   81.89
   2   5  -3  582.74   42.30
  -1  -5   3   56.09   10.20
  -1  -5   3   73.49   18.90
   1  -5  -3   66.89   19.20
   1   5  -3   50.89   23.20
   1   5  -3   62.39   23.30
  -1   5   3   66.39   27.70
   0  -5  -3  139.19   21.40
   0  -5   3  138.09   25.20
   0  -5   3  143.99   19.00
   0  -5  -3  145.39   12.70
   0   5  -3  171.18   44.90
   0   5  -3  155.98   35.00
   0   5   3  185.88   58.19
   0   5  -3  163.18   17.20
   1  -5   3  824.82   50.49
  -1  -5  -3  727.43   56.39
  -1  -5  -3  765.82   37.70
  -1   5  -3  778.52   61.69
  -1   5  -3  722.63   66.29
  -1   5  -3  879.31   46.40
   1   5   3  756.62   83.29
   1   5   3  646.84   95.09
   2  -5   3  932.11   57.59
  -2  -5  -3  933.21   43.60
  -2  -5  -3  833.32   62.19
   2   5   3  907.81   94.89
  -2   5  -3  918.81   49.10
   2   5   3  894.11  125.39
   3  -5   3  297.37   32.70
  -3  -5  -3  327.57   22.10
  -3  -5  -3  335.07   36.50
   3   5   3  372.46   58.29
   3   5   3  286.77   74.39
   4  -5   3  140.19   22.00
  -4  -5  -3  142.19   14.50
   4   5   3  149.59   80.29
  -5  -5  -3  192.28   11.50
  -5  -5  -3  170.78   10.70
  -5  -5  -3  180.38   11.00
  -5  -5  -3  180.38   17.30
  -5  -5  -3  181.18   13.50
   5  -5   3  196.58   28.00
  -5  -5  -3  148.19   12.80
   5   5   3  176.58   23.90
  -5   5  -3  176.28   15.60
  -5   5  -3  187.18   11.20
  -5   5  -3  184.48   14.10
  -5   5  -3  180.08   14.00
  -5   5  -3  189.48   13.90
   5   5   3  198.58   64.39
  -5   5  -3  173.78   15.10
  -5   5  -3  178.28   14.30
  -5   5  -3  188.98   14.10
  -5   5  -3  176.68   16.80
  -5   5  -3  177.58   13.40
  -5   5  -3  170.68   12.80
   5   5   3  136.09   62.39
  -6  -5  -3  720.93   31.30
  -6  -5  -3  718.43   33.60
   6  -5   3  607.24   82.09
  -6  -5  -3  751.52   33.50
  -6  -5  -3  727.43   31.60
   6  -5   3  812.42   64.99
  -6  -5  -3  711.63   30.50
  -6  -5  -3  734.23   36.00
  -6  -5  -3  656.83   40.40
  -6  -5  -3  731.73   31.40
  -6  -5  -3  746.63   32.20
  -6   5  -3  733.93   35.90
  -6   5  -3  714.93   38.10
  -6   5  -3  725.33   30.60
  -6   5  -3  752.42   36.00
   6   5   3  665.43   47.60
  -6   5  -3  741.83   35.50
  -6   5  -3  712.73   38.20
  -6   5  -3  738.93   33.00
  -6   5  -3  753.22   36.20
  -6   5  -3  720.23   35.20
   6   5   3  670.73  142.99
  -6   5  -3  719.73   36.60
  -6   5  -3  747.03   41.80
  -7  -5  -3  907.01   41.00
   7  -5   3 1096.39  146.99
  -7  -5  -3  933.51   42.00
  -7  -5  -3  974.40   38.60
  -7  -5  -3  972.90   40.60
  -7  -5  -3  918.31   40.90
  -7  -5  -3  890.41   38.50
  -7  -5  -3  915.61   44.30
  -7  -5  -3  918.11   38.90
  -7  -5  -3  964.50   39.70
  -7   5  -3  990.00   47.30
  -7   5  -3  950.70   43.90
   7   5   3  884.11   53.99
  -7   5  -3  941.21   46.40
  -7   5  -3  996.10   51.29
  -7   5  -3  932.11   43.10
  -7   5  -3  898.61   43.70
  -7   5  -3  916.51   45.00
  -7   5  -3  945.51   37.80
  -7   5  -3  940.61   40.60
  -7   5  -3  906.41   44.20
  -8  -5  -3  498.55   28.30
  -8  -5  -3  467.05   23.90
  -8  -5  -3  459.05   31.30
  -8  -5  -3  489.25   23.00
  -8  -5  -3  496.95   22.60
  -8  -5  -3  520.05   27.90
  -8  -5  -3  490.35   28.20
  -8   5  -3  458.75   39.20
  -8   5  -3  493.45   25.50
  -8   5  -3  464.95   21.30
  -8   5  -3  481.15   27.80
  -8   5  -3  499.85   32.20
  -8   5  -3  506.55   29.90
   8   5   3  483.85   31.90
  -8   5  -3  465.35   31.20
  -8   5  -3  483.85   35.10
  -8   5  -3  409.56   26.30
  -8   5  -3  426.96   31.90
  -9  -5  -3   29.10    4.00
  -9  -5  -3   32.00    4.80
  -9  -5  -3   30.40    5.00
  -9  -5  -3   29.00    6.40
  -9  -5  -3   38.20    4.90
  -9  -5  -3   30.60    4.30
  -9  -5  -3   30.60    4.10
  -9   5  -3   26.00    5.40
  -9   5  -3   34.70    5.70
  -9   5  -3   31.60    6.00
  -9   5  -3   33.60    5.80
  -9   5  -3   32.70    8.60
  -9   5  -3   22.00    5.20
  -9   5  -3   49.40    9.10
  -9   5  -3   46.70    7.60
 -10  -5  -3   18.00    2.90
 -10  -5  -3   28.60    4.00
 -10  -5  -3   28.20    4.10
 -10  -5  -3   26.70    3.10
 -10  -5  -3   19.70    4.70
 -10   5  -3   26.20    5.50
 -10   5  -3   21.40    5.60
 -10   5  -3   20.40    4.60
 -10   5  -3   25.00    4.20
 -10   5  -3   18.00    4.90
 -10   5  -3   32.00    6.20
 -11   5  -3   12.00    4.10
 -11  -6   3   38.80    4.10
 -11  -6   3   41.50    5.30
 -11  -6   3   37.30    3.30
 -10  -6   3   69.99    5.50
 -10  -6   3   82.79    6.70
 -10  -6   3   72.89    5.90
 -10  -6   3   72.09    6.10
 -10  -6   3   69.79    5.80
 -10   6   3   64.59    5.80
 -10   6   3   71.99    5.30
 -10   6   3   69.39    5.30
 -10   6   3   74.19    7.00
 -10   6   3   79.29   25.30
 -10   6   3   75.99    9.70
 -10   6   3   69.59    6.60
  -9  -6   3  736.83   31.30
  -9  -6   3  758.22   31.70
  -9  -6   3  738.53   30.40
  -9  -6   3  743.13   32.40
  -9  -6   3  752.92   31.10
  -9  -6   3  754.42   32.20
  -9  -6   3  698.73   34.20
  -9   6   3  805.12   48.10
  -9   6   3  777.82   33.70
  -9   6   3  705.63   40.90
   9   6  -3  759.52   49.50
  -9   6   3  659.53   38.20
  -9   6   3  743.93   32.20
  -9   6   3  708.53   34.10
  -9   6   3  754.92   39.40
  -9   6   3  720.13   31.90
  -9   6   3  736.23   30.00
  -9   6   3  764.42   29.30
  -9   6   3  756.72   33.10
  -8  -6   3  405.46   20.20
  -8  -6   3  410.96   23.40
  -8  -6   3  427.16   21.60
  -8  -6   3  411.16   19.50
  -8  -6   3  406.56   20.00
  -8  -6   3  421.26   20.50
  -8  -6   3  429.46   20.80
  -8   6   3  433.46   30.20
  -8   6   3  399.36   27.80
  -8   6   3  397.46   19.20
  -8   6   3  399.96   21.00
  -8   6   3  415.56   32.50
  -8   6   3  391.06   18.20
  -8   6   3  418.36   21.60
  -8   6   3  405.36   22.40
   8   6  -3  348.57   33.80
  -8   6   3  402.86   27.30
  -8   6   3  402.96   28.80
  -8   6   3  412.16   22.50
  -8   6   3  432.26   30.50
  -8   6   3  389.36   22.60
  -7  -6   3   62.39    7.40
  -7  -6   3   60.19    6.70
  -7  -6   3   54.49    5.50
  -7  -6   3   60.49    5.90
  -7  -6   3   42.80    6.90
  -7  -6   3   58.99    6.00
  -7  -6   3   56.69    6.00
  -7  -6   3   49.70    6.50
  -7  -6   3   52.59    5.90
  -7  -6   3   64.79    7.60
  -7   6   3   77.99   15.20
  -7   6   3   52.69    6.90
   7   6  -3   41.50   80.59
  -7   6   3   53.19    6.70
   7   6  -3  130.79   54.59
  -7   6   3   59.59    7.80
  -7   6   3   56.79    6.40
  -7   6   3   51.39   13.20
  -7   6   3   58.79    9.30
  -7   6   3   58.59   12.30
  -7   6   3   49.90    7.10
   7   6  -3   76.39   17.80
  -7   6   3   59.99    5.30
  -7   6   3   53.69    5.90
  -7   6   3   56.99   11.30
  -7   6   3   48.80   13.00
  -7   6   3   62.99    7.90
  -6  -6   3   13.60    3.20
  -6  -6   3   18.10    4.60
  -6  -6   3   18.90    4.00
  -6  -6   3   17.50    3.80
  -6  -6   3   19.60    4.20
  -6  -6   3   18.40    4.30
  -6  -6   3   18.10    5.30
  -6  -6   3   18.80    4.60
  -6   6   3   19.90    4.40
  -6   6   3   15.30   10.30
  -6   6   3   14.90    3.70
  -6   6   3   19.70   11.60
  -6   6   3   20.00    3.40
  -6   6   3   26.30    9.00
  -6   6   3   31.60    7.90
  -6   6   3   18.80    5.10
  -6   6   3   18.30    7.40
   6   6  -3   54.49   32.30
   6   6  -3   20.20   10.60
  -6   6   3   18.20    8.60
   6   6  -3   -0.70   41.20
  -6   6   3   23.60    4.00
  -6   6   3   20.20    4.80
  -6   6   3   21.70    4.20
  -5  -6   3   69.69    6.00
  -5  -6   3   62.09    5.20
  -5  -6   3   72.69    9.50
   5  -6  -3   51.19   19.00
  -5  -6   3   64.59    5.60
  -5  -6   3   62.39    8.60
  -5  -6   3   61.39    6.10
  -5   6   3   63.39   10.30
   5   6  -3   76.59   16.10
  -5   6   3   71.39   10.50
  -5   6   3   71.99   11.10
  -5   6   3   65.09    6.30
  -5   6   3   75.39   14.20
   5   6  -3   63.89   80.29
  -5   6   3   70.99    7.00
  -5   6   3   65.99    7.30
  -5   6   3   72.19    8.80
  -5   6   3   64.39   13.20
  -5   6   3   64.99    7.10
   5   6  -3   23.10   36.80
   5   6  -3   88.79   33.10
  -5   6   3   59.19    6.50
  -4  -6   3  602.54   32.60
  -4  -6   3  554.54   25.70
   4  -6  -3  581.64   26.90
   4  -6  -3  630.94   57.49
   4   6  -3  633.94  101.09
   4   6  -3  416.96  105.69
   4   6  -3  548.85   67.69
   3  -6  -3  262.77   34.40
  -3  -6   3  282.37   25.70
  -3  -6   3  235.48   14.20
   3   6  -3  223.88   41.00
   3   6  -3  374.16  105.39
  -2  -6   3  302.97   29.80
  -2  -6   3  358.96   32.80
  -2  -6   3  347.67   22.60
   2  -6  -3  281.97   38.20
   2   6  -3  345.97   69.79
   2   6  -3  397.06   51.79
  -1  -6   3  679.73   55.99
   1  -6  -3  739.63   60.69
  -1  -6   3  751.02   49.90
  -1  -6   3  746.53   37.40
   1  -6  -3  704.63   36.70
   1   6  -3  685.93   67.89
   1   6  -3  689.03   90.49
  -1   6   3  761.62   84.49
   0  -6   3  466.55   27.20
   0  -6  -3  452.75   21.70
   0  -6   3  473.85   46.90
   0  -6  -3  436.16   45.20
   0  -6   3  476.55   37.30
   0  -6  -3  480.15   27.40
   0   6  -3  399.06   47.40
   0   6  -3  432.16   62.69
   0   6   3  461.45   73.49
   0   6  -3  367.26   58.09
  -1  -6  -3  146.39   10.30
  -1  -6  -3  167.28   15.10
  -1  -6  -3  150.28   26.20
   1  -6   3  124.59   33.20
   1  -6   3  165.88   21.90
   1   6   3  161.98   53.39
  -1   6  -3  170.68   28.80
   1   6   3  134.39   55.89
  -1   6  -3  221.78   51.39
   2  -6   3   74.89   24.60
   2  -6   3   89.79   14.90
  -2  -6  -3   81.59   10.60
   2  -6   3   93.49   11.00
  -2  -6  -3   55.39   16.50
   2   6   3   88.59   48.60
   2   6   3  132.39   46.30
   3  -6   3  511.15   43.20
   3  -6   3  480.25   61.99
  -3  -6  -3  481.35   30.10
  -3  -6  -3  466.55   48.30
   3   6   3  490.15  103.19
   3   6   3  571.44   80.69
   4  -6   3   98.49   32.30
  -4  -6  -3  139.89   14.70
  -4  -6  -3  145.69    9.40
   4  -6   3  146.39   24.50
   4   6   3  216.38   59.59
  -4   6  -3  140.99   12.30
   4   6   3  164.28   21.70
  -4   6  -3  128.29   14.60
   4   6   3   77.39   53.09
  -4   6  -3  146.79   14.70
  -4   6  -3  153.98   12.00
  -4   6  -3  158.78   13.90
  -4   6  -3  154.38   12.30
  -5  -6  -3  438.36   24.10
  -5  -6  -3  414.16   20.40
  -5  -6  -3  446.66   21.10
   5  -6   3  343.17   60.89
  -5  -6  -3  439.76   20.80
  -5  -6  -3  427.96   20.60
  -5  -6  -3  429.86   29.40
  -5   6  -3  428.96   27.70
  -5   6  -3  418.96   20.40
  -5   6  -3  428.86   27.40
  -5   6  -3  429.36   25.60
  -5   6  -3  426.16   22.10
  -5   6  -3  457.65   30.10
  -5   6  -3  441.96   25.00
  -5   6  -3  451.15   24.80
   5   6   3  387.46   35.10
   5   6   3  549.85   99.99
   5   6   3  309.27  127.69
  -5   6  -3  443.46   25.70
  -5   6  -3  431.76   24.50
  -5   6  -3  439.96   24.20
  -6  -6  -3   85.39    7.50
  -6  -6  -3   77.89   11.90
  -6  -6  -3   79.39    7.50
  -6  -6  -3   87.39    7.90
  -6  -6  -3   86.19    8.70
  -6  -6  -3   71.99    6.80
   6  -6   3  139.19   31.60
  -6  -6  -3   83.29    9.60
  -6  -6  -3   85.09    7.80
   6  -6   3  101.59   34.60
  -6   6  -3   85.39    8.80
  -6   6  -3   90.69   12.30
   6   6   3   63.69   16.20
  -6   6  -3   89.49   12.90
  -6   6  -3   91.99   10.30
  -6   6  -3   73.39    9.70
  -6   6  -3   84.19    9.70
  -6   6  -3   92.99   12.30
  -6   6  -3   88.99    9.90
  -6   6  -3   88.09   13.10
  -6   6  -3  105.59   13.80
   6   6   3  130.59   65.49
  -7  -6  -3  477.25   23.10
  -7  -6  -3  474.75   21.70
  -7  -6  -3  486.25   22.70
  -7  -6  -3  462.05   24.70
  -7  -6  -3  498.45   27.50
  -7  -6  -3  446.16   23.70
  -7  -6  -3  480.15   22.80
  -7  -6  -3  498.05   23.90
  -7   6  -3  462.75   29.60
  -7   6  -3  450.75   21.40
  -7   6  -3  474.25   24.30
  -7   6  -3  434.76   26.10
  -7   6  -3  480.55   27.10
   7   6   3  461.75   36.50
  -7   6  -3  456.75   31.80
  -7   6  -3  427.16   28.60
  -7   6  -3  493.25   27.20
  -7   6  -3  457.85   27.70
  -7   6  -3  435.96   25.00
  -8  -6  -3  209.78   14.40
  -8  -6  -3  194.78   12.80
  -8  -6  -3  210.68   12.00
  -8  -6  -3  191.48   12.00
  -8  -6  -3  176.38   14.90
  -8  -6  -3  193.58   12.50
  -8  -6  -3  206.28   12.40
  -8  -6  -3  210.58   13.60
  -8   6  -3  197.08   15.30
  -8   6  -3  214.18   18.20
  -8   6  -3  199.58   15.30
  -8   6  -3  175.48   17.70
   8   6   3  186.98   19.00
  -8   6  -3  185.78   14.10
  -8   6  -3  188.98   11.00
  -8   6  -3  207.88   15.40
  -8   6  -3  196.38   15.70
  -9  -6  -3   39.60    6.20
  -9  -6  -3   40.60    4.30
  -9  -6  -3   46.00    5.00
  -9  -6  -3   48.10    4.40
  -9  -6  -3   40.70    5.50
  -9  -6  -3   45.10    5.50
   9   6   3   43.50    7.50
  -9   6  -3   54.59   10.10
  -9   6  -3   38.20    6.00
  -9   6  -3   38.00    6.80
  -9   6  -3   36.40    5.80
  -9   6  -3   44.80    7.30
  -9   6  -3   38.50    7.90
  -9   6  -3   36.80    8.00
 -10  -6  -3   32.20    3.50
 -10  -6  -3   29.30    4.50
 -10  -6  -3   31.80    4.00
 -10  -6  -3   28.50    2.90
 -10  -6  -3   29.80    3.70
 -10   6  -3   29.70    4.80
 -10   6  -3   50.69    8.20
 -10   6  -3   28.90    5.90
 -10   6  -3   39.20    6.50
 -11  -7   3   36.50    3.70
 -11  -7   3   39.80    3.10
 -10  -7   3   12.40    2.20
 -10  -7   3   13.30    3.30
 -10  -7   3   15.10    2.80
 -10  -7   3   20.20    2.90
 -10  -7   3   19.50    2.90
 -10  -7   3   12.30    2.70
 -10   7   3   14.00    3.70
 -10   7   3   14.30    2.80
 -10   7   3   37.70   13.80
 -10   7   3   22.70    4.50
 -10   7   3   14.70    5.20
 -10   7   3   15.10    3.30
  -9  -7   3    0.00    1.10
  -9  -7   3    0.70    1.00
  -9  -7   3    0.60    1.10
  -9  -7   3   -0.40    1.00
  -9  -7   3   -0.20    1.20
  -9  -7   3    0.90    1.30
  -9   7   3   16.30   10.80
  -9   7   3   16.30   10.30
  -9   7   3   -2.00    1.70
   9   7  -3   -4.30    7.20
  -9   7   3    5.40    8.60
  -9   7   3   -0.20    1.40
  -9   7   3    2.90    2.50
  -9   7   3    3.10    2.00
  -9   7   3   -0.40    1.40
  -9   7   3    0.00    1.50
  -8  -7   3    2.40    1.60
  -8  -7   3    7.00    2.20
  -8  -7   3    5.90    2.30
  -8  -7   3    6.60    2.90
  -8  -7   3    5.40    1.80
  -8  -7   3    6.40    2.30
  -8  -7   3    7.80    2.30
   8   7  -3   -4.10    7.00
  -8   7   3    7.70    2.70
  -8   7   3    6.60    2.70
  -8   7   3    9.20    7.40
  -8   7   3   37.40   11.50
  -8   7   3    4.50    2.40
  -8   7   3   17.60   12.40
  -8   7   3    8.10    3.30
  -8   7   3    4.90    2.40
  -8   7   3    7.90    3.80
  -8   7   3    8.90    2.30
  -7  -7   3  250.57   14.50
  -7  -7   3  280.97   17.70
  -7  -7   3  275.97   15.30
  -7  -7   3  269.97   15.00
  -7  -7   3  279.37   15.30
  -7  -7   3  276.67   14.80
  -7  -7   3  273.17   15.70
  -7  -7   3  257.57   16.70
  -7  -7   3  272.87   14.20
  -7   7   3  259.97   17.40
  -7   7   3  301.17   24.50
  -7   7   3  298.57   25.20
  -7   7   3  263.07   15.80
  -7   7   3  256.27   20.90
  -7   7   3  256.27   24.00
  -7   7   3  254.17   14.10
  -7   7   3  277.47   17.00
  -7   7   3  266.77   16.30
   7   7  -3  270.77   29.80
  -7   7   3  271.37   13.20
  -6  -7   3   71.49    6.60
  -6  -7   3   69.99    9.20
  -6  -7   3   84.39    7.50
  -6  -7   3   80.29    9.60
  -6  -7   3   72.99    6.30
  -6  -7   3   75.99    6.50
  -6  -7   3   78.59    6.90
   6  -7  -3   90.99   34.50
  -6   7   3   69.99   10.00
   6   7  -3  164.98   44.70
  -6   7   3   77.69    8.20
  -6   7   3   80.39   19.50
  -6   7   3   99.89   16.20
   6   7  -3  139.99   72.29
  -6   7   3   75.39    7.50
  -6   7   3   61.69    7.30
  -6   7   3   88.69    9.10
  -6   7   3   80.49   10.70
  -5  -7   3  464.25   24.20
  -5  -7   3  514.65   30.10
  -5  -7   3  463.25   20.40
  -5  -7   3  482.55   22.50
  -5  -7   3  502.45   21.70
   5  -7  -3  509.25   55.89
  -5  -7   3  447.06   21.10
  -5   7   3  503.45   24.50
  -5   7   3  467.25   25.30
  -5   7   3  459.25   23.60
  -5   7   3  485.25   28.30
  -5   7   3  439.36   30.70
  -5   7   3  495.95   28.90
   5   7  -3  465.45  169.68
  -5   7   3  465.65   30.80
  -5   7   3  440.36   21.70
  -5   7   3  504.25   30.90
  -5   7   3  459.55   22.70
   5   7  -3  477.65   37.30
   5   7  -3  388.46   62.19
  -4  -7   3  115.49    9.50
  -4  -7   3  121.39    8.70
   4  -7  -3  126.09    9.30
   4  -7  -3   94.19   29.30
  -4  -7   3  108.79   13.00
   4   7  -3  128.99   35.70
  -4   7   3  128.99   10.20
  -4   7   3   88.99   13.70
  -4   7   3  124.79   10.60
  -4   7   3  128.09   10.50
  -4   7   3  127.09   13.00
   4   7  -3  284.67   89.69
  -4   7   3  121.19   12.40
  -4   7   3  114.49   13.10
   4   7  -3   82.09   75.19
  -4   7   3  122.09   14.50
  -3  -7   3  197.68   26.70
  -3  -7   3  179.18   16.40
  -3  -7   3  181.48   12.20
   3  -7  -3  114.09   29.10
   3  -7  -3  191.38   11.90
   3   7  -3  153.68   62.39
   3   7  -3  194.58   51.39
   3   7  -3  116.49   67.99
  -3   7   3  168.98   12.30
   3   7  -3  194.38   24.20
  -3   7   3  171.68   17.80
   2  -7  -3  747.13   67.59
  -2  -7   3  797.02   40.80
  -2  -7   3  702.83   51.39
  -2  -7   3  750.42   56.99
  -2  -7   3  787.32   33.80
   2  -7  -3  776.12   33.20
   2  -7  -3  738.03   40.20
   2   7  -3  725.83   76.79
   2   7  -3  763.62  103.49
   2   7  -3  637.24  115.99
  -1  -7   3  377.36   42.80
  -1  -7   3  415.46   36.60
   1  -7  -3  402.26   26.30
  -1  -7   3  395.66   25.90
   1  -7  -3  400.66   20.30
   1  -7  -3  327.97   43.20
   1   7  -3  359.06   99.69
  -1   7   3  441.26   65.99
   1   7  -3  462.95   72.19
   1   7  -3  350.26   50.69
   0  -7  -3  307.47   40.40
   0  -7  -3  323.37   17.50
   0  -7   3  273.17   21.60
   0  -7   3  300.37   30.50
   0  -7  -3  311.37   22.50
   0  -7   3  313.07   41.70
   0   7   3  329.57   69.89
   0   7  -3  290.17   44.30
   0   7  -3  278.07   56.89
   1  -7   3 1242.78   71.89
   1  -7   3 1116.39   55.29
   1  -7   3 1205.28   92.59
  -1  -7  -3 1174.98   56.59
  -1  -7  -3 1213.78   86.29
  -1  -7  -3 1297.27   49.10
   1   7   3 1198.18  126.59
   1   7   3 1153.98  141.99
  -1   7  -3 1131.29  101.39
  -1   7  -3 1138.29   90.69
   2  -7   3  339.67   33.70
  -2  -7  -3  317.37   18.20
  -2  -7  -3  281.07   22.60
  -2  -7  -3  341.17   40.50
   2  -7   3  340.27   23.20
   2  -7   3  320.77   47.60
   2   7   3  223.98   67.69
   2   7   3  201.98   78.79
   3  -7   3  740.23   80.19
  -3  -7  -3  643.14   61.59
   3  -7   3  702.03   54.19
  -3  -7  -3  674.83   39.00
  -3   7  -3  675.53   35.20
  -3   7  -3  669.03   29.00
  -3   7  -3  713.93   32.60
   3   7   3  678.13  123.99
  -3   7  -3  545.75   40.00
   3   7   3  849.91  112.69
  -3   7  -3  706.13   32.90
  -3   7  -3  692.83   34.00
  -4  -7  -3   16.90    3.50
   4  -7   3   14.70    4.30
   4  -7   3   28.00   11.00
  -4  -7  -3   11.40    4.90
   4  -7   3  -16.00   13.10
  -4  -7  -3   -6.20   23.00
  -4   7  -3   22.50    5.90
   4   7   3   25.40   11.30
  -4   7  -3   20.20    8.70
  -4   7  -3   16.00    5.80
   4   7   3   37.90   42.20
  -4   7  -3   20.10    5.20
  -4   7  -3   16.30    6.30
   4   7   3   14.20   28.80
  -4   7  -3   11.70    4.00
  -4   7  -3   21.10    4.20
  -5  -7  -3  129.79    9.30
   5  -7   3  130.39   31.00
  -5  -7  -3  114.39    9.30
  -5  -7  -3  138.69    9.60
  -5  -7  -3  118.49   11.20
  -5  -7  -3  122.99   15.10
  -5  -7  -3  133.89    9.40
   5  -7   3   93.09   35.60
  -5   7  -3  132.59   11.90
   5   7   3  111.89   21.40
  -5   7  -3  121.09   12.10
  -5   7  -3  126.69   15.50
   5   7   3  221.28   91.89
  -5   7  -3  135.19   12.10
  -5   7  -3  123.29   12.10
  -5   7  -3  140.69   15.80
  -5   7  -3  124.69   12.60
  -5   7  -3  130.39   12.20
  -5   7  -3  127.09    9.20
  -6  -7  -3  517.85   23.70
  -6  -7  -3  564.24   25.40
  -6  -7  -3  553.54   25.70
  -6  -7  -3  576.04   26.00
  -6  -7  -3  532.95   25.10
  -6  -7  -3  572.54   29.50
  -6  -7  -3  538.55   34.20
  -6   7  -3  522.65   29.20
  -6   7  -3  538.75   35.20
   6   7   3  501.75   40.40
  -6   7  -3  545.15   27.70
  -6   7  -3  544.45   29.60
  -6   7  -3  547.05   29.40
  -6   7  -3  587.64   34.80
  -6   7  -3  561.24   31.60
  -6   7  -3  582.14   30.70
  -6   7  -3  545.25   24.70
  -7  -7  -3  167.28   12.60
  -7  -7  -3  169.38   16.20
  -7  -7  -3  175.48   10.30
  -7  -7  -3  135.49   14.00
  -7  -7  -3  165.98   13.70
  -7  -7  -3  172.08   12.10
  -7  -7  -3  162.18   11.40
  -7   7  -3  160.28   17.50
  -7   7  -3  171.98   10.50
  -7   7  -3  162.18   13.80
  -7   7  -3  179.48   14.70
  -7   7  -3  177.08   15.60
  -7   7  -3  226.08   26.90
  -7   7  -3  152.18   17.70
   7   7   3  150.78   29.60
  -7   7  -3  150.38   14.90
  -7   7  -3  164.78   13.30
  -8  -7  -3  334.07   15.90
  -8  -7  -3  299.97   17.90
  -8  -7  -3  276.87   16.50
  -8  -7  -3  324.67   19.70
  -8  -7  -3  326.47   15.00
  -8  -7  -3  336.07   16.70
  -8  -7  -3  245.18   18.00
  -8   7  -3  297.37   19.30
   8   7   3  304.87   23.60
  -8   7  -3  296.37   20.20
  -8   7  -3  307.47   14.60
  -8   7  -3  338.47   20.30
  -8   7  -3  258.77   18.30
  -8   7  -3  325.87   23.60
  -8   7  -3  341.77   24.00
  -8   7  -3  299.67   18.30
  -9  -7  -3  117.19    7.40
  -9  -7  -3  135.19    9.00
  -9  -7  -3  130.49   10.20
  -9  -7  -3  114.39    8.00
  -9  -7  -3  131.09    9.50
  -9   7  -3  125.69   11.80
   9   7   3  128.99   10.60
  -9   7  -3  118.99   10.20
  -9   7  -3  104.29    9.70
  -9   7  -3  112.99   12.10
  -9   7  -3  144.39   12.20
 -10  -7  -3   19.20    2.40
 -10  -7  -3   20.20    2.60
 -10  -7  -3   19.90    2.30
 -10   7  -3   25.60    5.60
 -10   7  -3   16.40    4.10
 -10   7  -3   26.20    5.60
 -10   7  -3   14.80    4.70
 -10  -8   3   73.09    6.90
 -10  -8   3   55.19    4.50
 -10  -8   3   45.70    4.40
 -10   8   3   45.00    4.20
 -10   8   3   84.69   15.20
 -10   8   3   68.99    7.70
 -10   8   3   68.09    5.70
 -10   8   3   62.99    5.50
  -9  -8   3   51.89    5.10
  -9  -8   3   47.50    8.60
  -9  -8   3   52.49    4.50
  -9  -8   3   50.89    4.70
  -9  -8   3   53.69    5.10
  -9   8   3   49.40    5.30
  -9   8   3   54.69    5.60
   9   8  -3   49.20   12.20
  -9   8   3   49.60    5.20
  -9   8   3   44.50   15.80
  -9   8   3   38.90    9.40
  -9   8   3   53.19    5.30
  -8  -8   3  134.09    9.10
  -8  -8   3  119.89    7.80
  -8  -8   3  110.39    8.50
  -8  -8   3  124.99    8.60
  -8  -8   3  125.39   10.50
  -8  -8   3  110.29    8.20
  -8   8   3  116.79   12.70
   8   8  -3  131.69   21.10
  -8   8   3  109.89    7.40
  -8   8   3  156.98   19.40
  -8   8   3  118.89   18.40
  -8   8   3  115.99    9.10
  -8   8   3  115.39    9.10
  -8   8   3  102.79   15.20
  -8   8   3  121.69    9.30
  -8   8   3  104.39    9.50
  -7  -8   3  139.39   10.00
  -7  -8   3  166.98   12.80
  -7  -8   3  130.69   11.60
  -7  -8   3  148.59   10.20
  -7  -8   3  148.89   11.80
  -7  -8   3  151.88    9.90
  -7  -8   3  138.59    9.70
  -7   8   3  184.68   21.60
  -7   8   3  147.79   14.90
  -7   8   3  151.98   11.00
  -7   8   3  163.08   19.70
  -7   8   3  147.99   11.10
  -7   8   3  139.49   11.80
  -7   8   3  154.58   17.50
   7   8  -3  140.99   24.10
  -6  -8   3  324.87   16.10
   6  -8  -3  342.67   55.29
  -6  -8   3  353.66   17.00
  -6  -8   3  334.47   19.70
  -6  -8   3  350.96   18.00
  -6  -8   3  338.07   17.00
  -6  -8   3  323.97   22.70
  -6  -8   3  337.07   17.10
  -6   8   3  326.37   18.50
  -6   8   3  352.56   19.30
  -6   8   3  362.06   27.60
  -6   8   3  341.47   23.90
   6   8  -3  373.06  197.18
   6   8  -3  390.56   85.69
  -6   8   3  331.17   18.50
  -6   8   3  314.17   16.70
   6   8  -3  317.27   32.60
  -6   8   3  356.76   20.90
  -6   8   3  328.37   25.60
  -6   8   3  323.17   26.10
   5  -8  -3  108.89   32.30
  -5  -8   3  183.38    9.90
  -5  -8   3  178.98   12.80
  -5  -8   3  146.79   14.20
  -5  -8   3  169.58   16.20
  -5  -8   3  176.48   11.10
  -5   8   3  137.39   14.40
  -5   8   3  169.48   15.80
  -5   8   3  168.18   12.30
  -5   8   3  156.68   10.70
  -5   8   3  124.39   17.00
   5   8  -3  275.77   52.59
  -5   8   3  162.78   17.10
  -4  -8   3    2.20    2.90
  -4  -8   3   -2.30    2.70
   4  -8  -3  -10.30   10.90
  -4  -8   3    5.70    2.80
   4  -8  -3    9.30    2.60
  -4  -8   3    2.60    2.10
   4  -8  -3    3.20    3.70
   4   8  -3    5.90   57.99
  -4   8   3    3.30    2.40
   4   8  -3   15.30    8.80
  -4   8   3   -0.10    3.10
  -4   8   3   -0.60    4.80
  -4   8   3    1.60    2.90
   4   8  -3   -5.70    6.00
  -4   8   3    2.20    2.30
  -4   8   3   -0.20    7.00
   4   8  -3    2.40   20.90
  -4   8   3    1.50    2.70
  -4   8   3    1.70    2.50
  -3  -8   3   25.10    4.90
   3  -8  -3   22.10    5.20
  -3  -8   3   22.70    8.10
   3  -8  -3   32.70   15.30
   3  -8  -3   32.40    4.40
   3   8  -3   39.50   51.49
  -3   8   3   28.90    6.60
   3   8  -3   67.89   37.50
   3   8  -3   31.90    9.40
  -3   8   3   27.80    5.70
  -3   8   3   13.70    8.80
  -3   8   3   40.20    6.80
   3   8  -3   20.60   49.20
  -3   8   3   24.00    4.80
  -3   8   3   24.50    5.00
  -3   8   3   25.60    6.90
   3   8  -3   24.30    8.90
  -2  -8   3  181.28   17.00
  -2  -8   3  192.48   29.80
   2  -8  -3  165.78   16.90
   2  -8  -3  117.49   29.60
  -2  -8   3  168.38   12.40
   2  -8  -3  159.28   12.10
   2  -8  -3  165.08   12.00
   2   8  -3  143.29   16.90
  -2   8   3  160.08   13.00
   2   8  -3  105.59   75.39
   2   8  -3  217.28   62.99
   2   8  -3  191.58   49.90
  -2   8   3  127.79   15.20
  -2   8   3  168.68   10.60
   1  -8  -3   48.80    6.80
  -1  -8   3   40.50    6.40
   1  -8  -3   46.90    5.90
   1  -8  -3   55.69   19.40
  -1  -8   3   47.70   19.40
  -1  -8   3   56.79   17.70
  -1  -8   3   37.20    8.80
  -1  -8   3   54.49    6.90
   1  -8  -3   58.59    9.20
   1   8  -3  100.19   38.40
  -1   8   3   97.79   40.00
   1   8  -3  126.09   69.19
[truncated: 608,017 more chars]
